# Supplementary material for: In silico identification of drug target pathways in breast cancer subtypes using pathway cross-talk inhibition
Source: J Transl Med. 2018 Jun 5;16:154. doi: 10.1186/s12967-018-1535-2 (PMC5989433; doi:10.1186/s12967-018-1535-2)
Supplement: Supplementary file 1 — Additional file 1. Shows the network efficiency after inhibition of individual and combined pathway(s) in luminal A BC. [file 12967_2018_1535_MOESM1_ESM.xlsx]

## Sheet: luminal A NE individual pathway
Pathway	NE
LXR/RXR_Activation	0.304361
Extrinsic_Prothrombin_Activation_Pathway	0.31051
Estrogen_Receptor_Signaling	0.313728
Human_Embryonic_Stem_Cell_Pluripotency	0.315798
Ethanol_Degradation_IV	0.316897
RAR_Activation	0.317038
Fatty_Acid__-oxidation	0.317802
Bladder_Cancer_Signaling	0.317988
Factors_Promoting_Cardiogenesis_in_Vertebrates	0.318032
Glioma_Invasiveness_Signaling	0.318292
Tryptophan_Degradation_X_(Mammalian,_via_Tryptamine)	0.318338
Superoxide_Radicals_Degradation	0.318338
Mitotic_Roles_of_Polo-Like_Kinase	0.318681
Oxidative_Ethanol_Degradation_III	0.319075
Semaphorin_Signaling_in_Neurons	0.319131
Dopamine_Degradation	0.319251
Pregnenolone_Biosynthesis	0.319257
FXR/RXR_Activation	0.319355
Eicosanoid_Signaling	0.319418
Putrescine_Degradation_III	0.319446
Noradrenaline_and_Adrenaline_Degradation	0.31958
Acute_Phase_Response_Signaling	0.319622
Regulation_of_Cellular_Mechanics_by_Calpain_Protease	0.319877
HIF1__Signaling	0.319909
Assembly_of_RNA_Polymerase_II_Complex	0.319929
Retinoate_Biosynthesis_I	0.320398
G_s_Signaling	0.320615
Chondroitin_Sulfate_Biosynthesis	0.320685
Chondroitin_Sulfate_Biosynthesis_(Late_Stages)	0.321083
Colorectal_Cancer_Metastasis_Signaling	0.321253
CXCR4_Signaling	0.3215
Axonal_Guidance_Signaling	0.321624
Histamine_Degradation	0.32167
Ethanol_Degradation_II	0.321768
TR/RXR_Activation	0.321905
Protein_Ubiquitination_Pathway	0.322169
Estrogen_Dependent_Breast_Cancer_Signaling	0.322309
Pancreatic_Adenocarcinoma_Signaling	0.322335
Triacylglycerol_Biosynthesis	0.322446
Basal_Cell_Carcinoma_Signaling	0.322446
Heparan_Sulfate_Biosynthesis	0.322446
Heparan_Sulfate_Biosynthesis_(Late_Stages)	0.322446
Wnt/_-catenin_Signaling	0.322446
Cardiac__-adrenergic_Signaling	0.322452
Regulation_of_the_Epithelial-Mesenchymal_Transition_Pathway	0.322498
Protein_Kinase_A_Signaling	0.322674
Leukocyte_Extravasation_Signaling	0.322902
Intrinsic_Prothrombin_Activation_Pathway	0.322925
G_Beta_Gamma_Signaling	0.322954
Thrombin_Signaling	0.322954
Granzyme_A_Signaling	0.32302
Ephrin_B_Signaling	0.32328
Signaling_by_Rho_Family_GTPases	0.32328
Ephrin_Receptor_Signaling	0.323355
Coagulation_System	0.323456
VDR/RXR_Activation	0.323456
Thyroid_Cancer_Signaling	0.323541
Tight_Junction_Signaling	0.323541
Inhibition_of_Matrix_Metalloproteases	0.323685
Atherosclerosis_Signaling	0.323766
Role_of_Osteoblasts,_Osteoclasts_and_Chondrocytes_in_Rheumatoid_Arthritis	0.323766
Estrogen-mediated_S-phase_Entry	0.324239
CD28_Signaling_in_T_Helper_Cells	0.324313
Chemokine_Signaling	0.324454
EIF2_Signaling	0.324653
Hepatic_Fibrosis_/_Hepatic_Stellate_Cell_Activation	0.325059
LPS/IL1_Mediated_Inhibition_of_RXR_Function	0.325398
Role_of_Macrophages,_Fibroblasts_and_Endothelial_Cells_in_Rheumatoid_Arthritis	0.325408
Granulocyte_Adhesion_and_Diapedesis	0.327069
Agranulocyte_Adhesion_and_Diapedesis	0.339942
Cell_Cycle_Regulation_by_BTG_Family_Proteins	0.339942
Dendritic_Cell_Maturation	0.339942
Thrombopoietin_Signaling	0.339942

## Sheet: luminal A NE combined pathways
Pathway 1	Pathway 2	NE
LXR/RXR_Activation	Extrinsic_Prothrombin_Activation_Pathway	0.292718
Estrogen_Receptor_Signaling	LXR/RXR_Activation	0.29499
LXR/RXR_Activation	RAR_Activation	0.296223
LXR/RXR_Activation	Human_Embryonic_Stem_Cell_Pluripotency	0.297418
Mitotic_Roles_of_Polo-Like_Kinase	Intrinsic_Prothrombin_Activation_Pathway	0.298136
Ethanol_Degradation_IV	LXR/RXR_Activation	0.29878
Fatty_Acid__-oxidation	LXR/RXR_Activation	0.299015
LXR/RXR_Activation	Factors_Promoting_Cardiogenesis_in_Vertebrates	0.299663
Glioma_Invasiveness_Signaling	LXR/RXR_Activation	0.300278
LXR/RXR_Activation	Bladder_Cancer_Signaling	0.300301
Tryptophan_Degradation_X_(Mammalian,_via_Tryptamine)	LXR/RXR_Activation	0.30052
LXR/RXR_Activation	Pregnenolone_Biosynthesis	0.300941
Dopamine_Degradation	LXR/RXR_Activation	0.301061
Oxidative_Ethanol_Degradation_III	LXR/RXR_Activation	0.301106
LXR/RXR_Activation	Putrescine_Degradation_III	0.301248
LXR/RXR_Activation	FXR/RXR_Activation	0.301403
LXR/RXR_Activation	Noradrenaline_and_Adrenaline_Degradation	0.301516
Estrogen_Receptor_Signaling	Extrinsic_Prothrombin_Activation_Pathway	0.301563
LXR/RXR_Activation	Acute_Phase_Response_Signaling	0.301934
LXR/RXR_Activation	Regulation_of_Cellular_Mechanics_by_Calpain_Protease	0.301955
LXR/RXR_Activation	HIF1__Signaling	0.30199
LXR/RXR_Activation	Assembly_of_RNA_Polymerase_II_Complex	0.30201
Retinoate_Biosynthesis_I	LXR/RXR_Activation	0.302055
LXR/RXR_Activation	Superoxide_Radicals_Degradation	0.302141
LXR/RXR_Activation	G_s_Signaling	0.302321
LXR/RXR_Activation	Semaphorin_Signaling_in_Neurons	0.302638
Mitotic_Roles_of_Polo-Like_Kinase	LXR/RXR_Activation	0.302667
LXR/RXR_Activation	Protein_Ubiquitination_Pathway	0.302748
LXR/RXR_Activation	Chondroitin_Sulfate_Biosynthesis	0.302811
LXR/RXR_Activation	Eicosanoid_Signaling	0.303109
LXR/RXR_Activation	Chondroitin_Sulfate_Biosynthesis_(Late_Stages)	0.303232
LXR/RXR_Activation	Colorectal_Cancer_Metastasis_Signaling	0.303411
LXR/RXR_Activation	Histamine_Degradation	0.303763
LXR/RXR_Activation	Ethanol_Degradation_II	0.303867
LXR/RXR_Activation	CXCR4_Signaling	0.303943
LXR/RXR_Activation	Intrinsic_Prothrombin_Activation_Pathway	0.304074
Human_Embryonic_Stem_Cell_Pluripotency	Extrinsic_Prothrombin_Activation_Pathway	0.304076
LXR/RXR_Activation	Protein_Kinase_A_Signaling	0.304361
LXR/RXR_Activation	TR/RXR_Activation	0.304391
LXR/RXR_Activation	Estrogen-Dependent_Breast_Cancer_Signaling	0.30444
LXR/RXR_Activation	Pancreatic_Adenocarcinoma_Signaling	0.304467
LXR/RXR_Activation	Cardiac__-adrenergic_Signaling	0.304681
Axonal_Guidance_Signaling	LXR/RXR_Activation	0.304692
LXR/RXR_Activation	Regulation_of_the_Epithelial-Mesenchymal_Transition_Pathway	0.304729
LXR/RXR_Activation	Triacylglycerol_Biosynthesis	0.304936
LXR/RXR_Activation	Basal_Cell_Carcinoma_Signaling	0.304936
LXR/RXR_Activation	Heparan_Sulfate_Biosynthesis	0.304936
LXR/RXR_Activation	Heparan_Sulfate_Biosynthesis_(Late_Stages)	0.304936
LXR/RXR_Activation	Wnt/_-catenin_Signaling	0.304936
Ethanol_Degradation_IV	Extrinsic_Prothrombin_Activation_Pathway	0.305128
LXR/RXR_Activation	Leukocyte_Extravasation_Signaling	0.305178
LXR/RXR_Activation	Granzyme_A_Signaling	0.305192
LXR/RXR_Activation	Ephrin_B_Signaling	0.305468
LXR/RXR_Activation	Signaling_by_Rho_Family_GTPases	0.305468
LXR/RXR_Activation	G_Beta_Gamma_Signaling	0.305502
LXR/RXR_Activation	Thrombin_Signaling	0.305502
RAR_Activation	Extrinsic_Prothrombin_Activation_Pathway	0.30557
LXR/RXR_Activation	Coagulation_System	0.305654
LXR/RXR_Activation	VDR/RXR_Activation	0.305654
LXR/RXR_Activation	Ephrin_Receptor_Signaling	0.305657
LXR/RXR_Activation	Estrogen-mediated_S-phase_Entry	0.305782
Fatty_Acid__-oxidation	Extrinsic_Prothrombin_Activation_Pathway	0.305818
LXR/RXR_Activation	Thyroid_Cancer_Signaling	0.305834
LXR/RXR_Activation	Tight_Junction_Signaling	0.305834
LXR/RXR_Activation	Inhibition_of_Matrix_Metalloproteases	0.306006
LXR/RXR_Activation	Atherosclerosis_Signaling	0.306071
LXR/RXR_Activation	Role_of_Osteoblasts,_Osteoclasts_and_Chondrocytes_in_Rheumatoid_Arthritis	0.306071
Bladder_Cancer_Signaling	Extrinsic_Prothrombin_Activation_Pathway	0.306282
Tryptophan_Degradation_X_(Mammalian,_via_Tryptamine)	Extrinsic_Prothrombin_Activation_Pathway	0.306563
Glioma_Invasiveness_Signaling	Extrinsic_Prothrombin_Activation_Pathway	0.306605
LXR/RXR_Activation	CD28_Signaling_in_T_Helper_Cells	0.306651
Superoxide_Radicals_Degradation	Extrinsic_Prothrombin_Activation_Pathway	0.306653
Extrinsic_Prothrombin_Activation_Pathway	Factors_Promoting_Cardiogenesis_in_Vertebrates	0.30677
LXR/RXR_Activation	EIF2_Signaling	0.306818
LXR/RXR_Activation	LPS/IL-1_Mediated_Inhibition_of_RXR_Function	0.307003
Estrogen_Receptor_Signaling	Human_Embryonic_Stem_Cell_Pluripotency	0.307118
LXR/RXR_Activation	Hepatic_Fibrosis_/_Hepatic_Stellate_Cell_Activation	0.307364
Oxidative_Ethanol_Degradation_III	Extrinsic_Prothrombin_Activation_Pathway	0.307433
Extrinsic_Prothrombin_Activation_Pathway	Semaphorin_Signaling_in_Neurons	0.307492
Extrinsic_Prothrombin_Activation_Pathway	Pregnenolone_Biosynthesis	0.307626
FXR/RXR_Activation	Extrinsic_Prothrombin_Activation_Pathway	0.307729
Dopamine_Degradation	Extrinsic_Prothrombin_Activation_Pathway	0.307793
Extrinsic_Prothrombin_Activation_Pathway	Eicosanoid_Signaling	0.307797
Putrescine_Degradation_III	Extrinsic_Prothrombin_Activation_Pathway	0.307826
Acute_Phase_Response_Signaling	Extrinsic_Prothrombin_Activation_Pathway	0.307923
Extrinsic_Prothrombin_Activation_Pathway	Noradrenaline_and_Adrenaline_Degradation	0.308126
Protein_Ubiquitination_Pathway	Eicosanoid_Signaling	0.308274
Regulation_of_Cellular_Mechanics_by_Calpain_Protease	Extrinsic_Prothrombin_Activation_Pathway	0.308282
HIF1__Signaling	Extrinsic_Prothrombin_Activation_Pathway	0.308316
Assembly_of_RNA_Polymerase_II_Complex	Extrinsic_Prothrombin_Activation_Pathway	0.308337
Extrinsic_Prothrombin_Activation_Pathway	G_s_Signaling	0.308527
Retinoate_Biosynthesis_I	Extrinsic_Prothrombin_Activation_Pathway	0.308589
Estrogen_Receptor_Signaling	Ethanol_Degradation_IV	0.308605
Estrogen_Receptor_Signaling	Mitotic_Roles_of_Polo-Like_Kinase	0.308858
Extrinsic_Prothrombin_Activation_Pathway	Chondroitin_Sulfate_Biosynthesis	0.309137
LXR/RXR_Activation	Granulocyte_Adhesion_and_Diapedesis	0.309157
Estrogen_Receptor_Signaling	Factors_Promoting_Cardiogenesis_in_Vertebrates	0.309282
Estrogen_Receptor_Signaling	Bladder_Cancer_Signaling	0.309442
Extrinsic_Prothrombin_Activation_Pathway	Chondroitin_Sulfate_Biosynthesis_(Late_Stages)	0.309558
Estrogen_Receptor_Signaling	Fatty_Acid__-oxidation	0.309561
Axonal_Guidance_Signaling	Extrinsic_Prothrombin_Activation_Pathway	0.309592
Extrinsic_Prothrombin_Activation_Pathway	Colorectal_Cancer_Metastasis_Signaling	0.309648
Estrogen_Receptor_Signaling	Superoxide_Radicals_Degradation	0.309668
Estrogen_Receptor_Signaling	RAR_Activation	0.309872
Human_Embryonic_Stem_Cell_Pluripotency	Factors_Promoting_Cardiogenesis_in_Vertebrates	0.30988
Extrinsic_Prothrombin_Activation_Pathway	CXCR4_Signaling	0.30991
Estrogen_Receptor_Signaling	Tryptophan_Degradation_X_(Mammalian,_via_Tryptamine)	0.310047
Extrinsic_Prothrombin_Activation_Pathway	Histamine_Degradation	0.31009
Protein_Ubiquitination_Pathway	Extrinsic_Prothrombin_Activation_Pathway	0.31017
Extrinsic_Prothrombin_Activation_Pathway	Ethanol_Degradation_II	0.310193
Human_Embryonic_Stem_Cell_Pluripotency	RAR_Activation	0.310324
Extrinsic_Prothrombin_Activation_Pathway	TR/RXR_Activation	0.310338
Ethanol_Degradation_IV	Human_Embryonic_Stem_Cell_Pluripotency	0.310358
Estrogen_Receptor_Signaling	Assembly_of_RNA_Polymerase_II_Complex	0.310483
Extrinsic_Prothrombin_Activation_Pathway	Inhibition_of_Matrix_Metalloproteases	0.31051
Estrogen_Receptor_Signaling	FXR/RXR_Activation	0.310731
Estrogen_Receptor_Signaling	Semaphorin_Signaling_in_Neurons	0.310755
Extrinsic_Prothrombin_Activation_Pathway	Estrogen-Dependent_Breast_Cancer_Signaling	0.310766
Extrinsic_Prothrombin_Activation_Pathway	Pancreatic_Adenocarcinoma_Signaling	0.310794
Estrogen_Receptor_Signaling	Pregnenolone_Biosynthesis	0.310903
Extrinsic_Prothrombin_Activation_Pathway	Cardiac__-adrenergic_Signaling	0.310918
Estrogen_Receptor_Signaling	Eicosanoid_Signaling	0.310922
Estrogen_Receptor_Signaling	Putrescine_Degradation_III	0.310931
Extrinsic_Prothrombin_Activation_Pathway	Regulation_of_the_Epithelial-Mesenchymal_Transition_Pathway	0.311056
Estrogen_Receptor_Signaling	Noradrenaline_and_Adrenaline_Degradation	0.311092
Estrogen_Receptor_Signaling	Glioma_Invasiveness_Signaling	0.311231
Extrinsic_Prothrombin_Activation_Pathway	Triacylglycerol_Biosynthesis	0.311235
Extrinsic_Prothrombin_Activation_Pathway	Basal_Cell_Carcinoma_Signaling	0.311235
Extrinsic_Prothrombin_Activation_Pathway	Heparan_Sulfate_Biosynthesis	0.311235
Extrinsic_Prothrombin_Activation_Pathway	Heparan_Sulfate_Biosynthesis_(Late_Stages)	0.311235
Extrinsic_Prothrombin_Activation_Pathway	Wnt/_-catenin_Signaling	0.311235
Extrinsic_Prothrombin_Activation_Pathway	Protein_Kinase_A_Signaling	0.311242
Fatty_Acid__-oxidation	RAR_Activation	0.311263
Estrogen_Receptor_Signaling	HIF1__Signaling	0.311359
Extrinsic_Prothrombin_Activation_Pathway	G_Beta_Gamma_Signaling	0.311449
Extrinsic_Prothrombin_Activation_Pathway	Thrombin_Signaling	0.311449
Extrinsic_Prothrombin_Activation_Pathway	Leukocyte_Extravasation_Signaling	0.311484
Estrogen_Receptor_Signaling	Regulation_of_Cellular_Mechanics_by_Calpain_Protease	0.311545
Estrogen_Receptor_Signaling	Oxidative_Ethanol_Degradation_III	0.311586
Extrinsic_Prothrombin_Activation_Pathway	Granzyme_A_Signaling	0.311608
Ethanol_Degradation_IV	RAR_Activation	0.311673
Ethanol_Degradation_IV	Fatty_Acid__-oxidation	0.311769
Human_Embryonic_Stem_Cell_Pluripotency	Bladder_Cancer_Signaling	0.311785
Glioma_Invasiveness_Signaling	Human_Embryonic_Stem_Cell_Pluripotency	0.31179
Extrinsic_Prothrombin_Activation_Pathway	Ephrin_B_Signaling	0.311794
Extrinsic_Prothrombin_Activation_Pathway	Signaling_by_Rho_Family_GTPases	0.311794
Extrinsic_Prothrombin_Activation_Pathway	Ephrin_Receptor_Signaling	0.311815
Estrogen_Receptor_Signaling	Dopamine_Degradation	0.311877
Human_Embryonic_Stem_Cell_Pluripotency	Superoxide_Radicals_Degradation	0.311975
Tryptophan_Degradation_X_(Mammalian,_via_Tryptamine)	Human_Embryonic_Stem_Cell_Pluripotency	0.312045
Estrogen_Receptor_Signaling	Axonal_Guidance_Signaling	0.312068
Extrinsic_Prothrombin_Activation_Pathway	Thyroid_Cancer_Signaling	0.31207
Extrinsic_Prothrombin_Activation_Pathway	Tight_Junction_Signaling	0.31207
Fatty_Acid__-oxidation	Human_Embryonic_Stem_Cell_Pluripotency	0.312118
Extrinsic_Prothrombin_Activation_Pathway	Atherosclerosis_Signaling	0.31225
Extrinsic_Prothrombin_Activation_Pathway	Role_of_Osteoblasts,_Osteoclasts_and_Chondrocytes_in_Rheumatoid_Arthritis	0.31225
Mitotic_Roles_of_Polo-Like_Kinase	Extrinsic_Prothrombin_Activation_Pathway	0.312344
Estrogen-mediated_S-phase_Entry	Extrinsic_Prothrombin_Activation_Pathway	0.312365
Extrinsic_Prothrombin_Activation_Pathway	Coagulation_System	0.312388
Extrinsic_Prothrombin_Activation_Pathway	VDR/RXR_Activation	0.312388
Estrogen_Receptor_Signaling	Retinoate_Biosynthesis_I	0.312404
Estrogen_Receptor_Signaling	Chondroitin_Sulfate_Biosynthesis	0.312435
Dopamine_Degradation	Human_Embryonic_Stem_Cell_Pluripotency	0.312552
Ethanol_Degradation_IV	Bladder_Cancer_Signaling	0.31274
Estrogen_Receptor_Signaling	Chondroitin_Sulfate_Biosynthesis_(Late_Stages)	0.312822
Tryptophan_Degradation_X_(Mammalian,_via_Tryptamine)	RAR_Activation	0.312826
Extrinsic_Prothrombin_Activation_Pathway	CD28_Signaling_in_T_Helper_Cells	0.31283
Human_Embryonic_Stem_Cell_Pluripotency	Semaphorin_Signaling_in_Neurons	0.31284
Extrinsic_Prothrombin_Activation_Pathway	EIF2_Signaling	0.312923
Human_Embryonic_Stem_Cell_Pluripotency	FXR/RXR_Activation	0.312923
RAR_Activation	Factors_Promoting_Cardiogenesis_in_Vertebrates	0.312965
Extrinsic_Prothrombin_Activation_Pathway	Chemokine_Signaling	0.313037
RAR_Activation	Bladder_Cancer_Signaling	0.313064
Human_Embryonic_Stem_Cell_Pluripotency	Eicosanoid_Signaling	0.313076
Ethanol_Degradation_IV	Superoxide_Radicals_Degradation	0.313101
Fatty_Acid__-oxidation	Tryptophan_Degradation_X_(Mammalian,_via_Tryptamine)	0.313108
Estrogen_Receptor_Signaling	CXCR4_Signaling	0.313125
Glioma_Invasiveness_Signaling	RAR_Activation	0.313136
Ethanol_Degradation_IV	Mitotic_Roles_of_Polo-Like_Kinase	0.313141
Human_Embryonic_Stem_Cell_Pluripotency	Noradrenaline_and_Adrenaline_Degradation	0.313161
RAR_Activation	Superoxide_Radicals_Degradation	0.313184
Ethanol_Degradation_IV	Tryptophan_Degradation_X_(Mammalian,_via_Tryptamine)	0.313241
Dopamine_Degradation	Ethanol_Degradation_IV	0.313284
Oxidative_Ethanol_Degradation_III	Human_Embryonic_Stem_Cell_Pluripotency	0.313339
Human_Embryonic_Stem_Cell_Pluripotency	Acute_Phase_Response_Signaling	0.313366
LPS/IL-1_Mediated_Inhibition_of_RXR_Function	Extrinsic_Prothrombin_Activation_Pathway	0.313374
Superoxide_Radicals_Degradation	Factors_Promoting_Cardiogenesis_in_Vertebrates	0.313385
Mitotic_Roles_of_Polo-Like_Kinase	Fatty_Acid__-oxidation	0.313459
Glioma_Invasiveness_Signaling	Ethanol_Degradation_IV	0.313496
Estrogen_Receptor_Signaling	TR/RXR_Activation	0.313498
Bladder_Cancer_Signaling	Superoxide_Radicals_Degradation	0.313553
Human_Embryonic_Stem_Cell_Pluripotency	Regulation_of_Cellular_Mechanics_by_Calpain_Protease	0.313695
Estrogen_Receptor_Signaling	Estrogen-Dependent_Breast_Cancer_Signaling	0.313728
Human_Embryonic_Stem_Cell_Pluripotency	HIF1__Signaling	0.313728
Fatty_Acid__-oxidation	Superoxide_Radicals_Degradation	0.313737
Human_Embryonic_Stem_Cell_Pluripotency	Assembly_of_RNA_Polymerase_II_Complex	0.313782
Estrogen_Receptor_Signaling	Acute_Phase_Response_Signaling	0.31382
Mitotic_Roles_of_Polo-Like_Kinase	Bladder_Cancer_Signaling	0.31385
Extrinsic_Prothrombin_Activation_Pathway	Role_of_Macrophages,_Fibroblasts_and_Endothelial_Cells_in_Rheumatoid_Arthritis	0.313875
Human_Embryonic_Stem_Cell_Pluripotency	Putrescine_Degradation_III	0.313876
Ethanol_Degradation_IV	Factors_Promoting_Cardiogenesis_in_Vertebrates	0.313886
Ethanol_Degradation_IV	Semaphorin_Signaling_in_Neurons	0.313923
Estrogen_Receptor_Signaling	G_s_Signaling	0.313962
RAR_Activation	Eicosanoid_Signaling	0.313967
RAR_Activation	Semaphorin_Signaling_in_Neurons	0.314023
Bladder_Cancer_Signaling	Factors_Promoting_Cardiogenesis_in_Vertebrates	0.314049
Glioma_Invasiveness_Signaling	Bladder_Cancer_Signaling	0.314062
Oxidative_Ethanol_Degradation_III	RAR_Activation	0.314068
Dopamine_Degradation	RAR_Activation	0.314084
Intrinsic_Prothrombin_Activation_Pathway	Extrinsic_Prothrombin_Activation_Pathway	0.314121
RAR_Activation	Pregnenolone_Biosynthesis	0.314123
Estrogen_Receptor_Signaling	Triacylglycerol_Biosynthesis	0.314167
Estrogen_Receptor_Signaling	Basal_Cell_Carcinoma_Signaling	0.314167
Estrogen_Receptor_Signaling	Heparan_Sulfate_Biosynthesis	0.314167
Estrogen_Receptor_Signaling	Heparan_Sulfate_Biosynthesis_(Late_Stages)	0.314167
Estrogen_Receptor_Signaling	Wnt/_-catenin_Signaling	0.314167
Human_Embryonic_Stem_Cell_Pluripotency	G_s_Signaling	0.314177
Human_Embryonic_Stem_Cell_Pluripotency	Pregnenolone_Biosynthesis	0.314184
Estrogen_Receptor_Signaling	Pancreatic_Adenocarcinoma_Signaling	0.314202
Glioma_Invasiveness_Signaling	Mitotic_Roles_of_Polo-Like_Kinase	0.314213
Ethanol_Degradation_IV	Pregnenolone_Biosynthesis	0.314221
Glioma_Invasiveness_Signaling	Fatty_Acid__-oxidation	0.314267
Mitotic_Roles_of_Polo-Like_Kinase	Tryptophan_Degradation_X_(Mammalian,_via_Tryptamine)	0.314267
Ethanol_Degradation_IV	Eicosanoid_Signaling	0.314286
Tryptophan_Degradation_X_(Mammalian,_via_Tryptamine)	Bladder_Cancer_Signaling	0.314296
Estrogen_Receptor_Signaling	Protein_Kinase_A_Signaling	0.314312
Estrogen_Receptor_Signaling	Cardiac__-adrenergic_Signaling	0.314326
Estrogen_Receptor_Signaling	Intrinsic_Prothrombin_Activation_Pathway	0.31434
Tryptophan_Degradation_X_(Mammalian,_via_Tryptamine)	Factors_Promoting_Cardiogenesis_in_Vertebrates	0.314342
Ethanol_Degradation_IV	Putrescine_Degradation_III	0.314361
Bladder_Cancer_Signaling	FXR/RXR_Activation	0.314385
Dopamine_Degradation	Mitotic_Roles_of_Polo-Like_Kinase	0.314398
Glioma_Invasiveness_Signaling	Factors_Promoting_Cardiogenesis_in_Vertebrates	0.314436
Putrescine_Degradation_III	RAR_Activation	0.314461
Ethanol_Degradation_IV	Noradrenaline_and_Adrenaline_Degradation	0.314519
Estrogen_Receptor_Signaling	Regulation_of_the_Epithelial-Mesenchymal_Transition_Pathway	0.314519
Ethanol_Degradation_IV	Acute_Phase_Response_Signaling	0.314522
Estrogen_Receptor_Signaling	Ethanol_Degradation_II	0.314581
Fatty_Acid__-oxidation	Bladder_Cancer_Signaling	0.314593
RAR_Activation	Noradrenaline_and_Adrenaline_Degradation	0.314602
Glioma_Invasiveness_Signaling	Superoxide_Radicals_Degradation	0.31461
Ethanol_Degradation_IV	Retinoate_Biosynthesis_I	0.314644
Acute_Phase_Response_Signaling	RAR_Activation	0.314648
Tryptophan_Degradation_X_(Mammalian,_via_Tryptamine)	Superoxide_Radicals_Degradation	0.314657
Estrogen_Receptor_Signaling	G_Beta_Gamma_Signaling	0.314664
Estrogen_Receptor_Signaling	Thrombin_Signaling	0.314664
Mitotic_Roles_of_Polo-Like_Kinase	Human_Embryonic_Stem_Cell_Pluripotency	0.314679
Mitotic_Roles_of_Polo-Like_Kinase	Superoxide_Radicals_Degradation	0.314706
Ethanol_Degradation_IV	HIF1__Signaling	0.314757
Regulation_of_Cellular_Mechanics_by_Calpain_Protease	RAR_Activation	0.314813
RAR_Activation	Assembly_of_RNA_Polymerase_II_Complex	0.314813
Fatty_Acid__-oxidation	Eicosanoid_Signaling	0.314832
RAR_Activation	HIF1__Signaling	0.314848
Fatty_Acid__-oxidation	Oxidative_Ethanol_Degradation_III	0.314854
Dopamine_Degradation	Fatty_Acid__-oxidation	0.314857
Fatty_Acid__-oxidation	Factors_Promoting_Cardiogenesis_in_Vertebrates	0.314924
Bladder_Cancer_Signaling	Semaphorin_Signaling_in_Neurons	0.314937
Mitotic_Roles_of_Polo-Like_Kinase	Noradrenaline_and_Adrenaline_Degradation	0.31495
Fatty_Acid__-oxidation	Pregnenolone_Biosynthesis	0.314957
Human_Embryonic_Stem_Cell_Pluripotency	Chondroitin_Sulfate_Biosynthesis_(Late_Stages)	0.314969
Fatty_Acid__-oxidation	FXR/RXR_Activation	0.314971
Estrogen_Receptor_Signaling	Granzyme_A_Signaling	0.314982
Axonal_Guidance_Signaling	Human_Embryonic_Stem_Cell_Pluripotency	0.314996
Fatty_Acid__-oxidation	Putrescine_Degradation_III	0.315005
Ethanol_Degradation_IV	Regulation_of_Cellular_Mechanics_by_Calpain_Protease	0.315025
Estrogen_Receptor_Signaling	Histamine_Degradation	0.31503
Estrogen_Receptor_Signaling	Ephrin_B_Signaling	0.31503
Estrogen_Receptor_Signaling	Leukocyte_Extravasation_Signaling	0.31503
Estrogen_Receptor_Signaling	Signaling_by_Rho_Family_GTPases	0.31503
Human_Embryonic_Stem_Cell_Pluripotency	Colorectal_Cancer_Metastasis_Signaling	0.315043
Oxidative_Ethanol_Degradation_III	Bladder_Cancer_Signaling	0.315054
Dopamine_Degradation	Bladder_Cancer_Signaling	0.31509
Oxidative_Ethanol_Degradation_III	Factors_Promoting_Cardiogenesis_in_Vertebrates	0.3151
Putrescine_Degradation_III	Bladder_Cancer_Signaling	0.315108
Dopamine_Degradation	Factors_Promoting_Cardiogenesis_in_Vertebrates	0.315138
Glioma_Invasiveness_Signaling	Tryptophan_Degradation_X_(Mammalian,_via_Tryptamine)	0.315186
Bladder_Cancer_Signaling	Eicosanoid_Signaling	0.3152
Factors_Promoting_Cardiogenesis_in_Vertebrates	Pregnenolone_Biosynthesis	0.315214
Factors_Promoting_Cardiogenesis_in_Vertebrates	Semaphorin_Signaling_in_Neurons	0.315225
Ethanol_Degradation_IV	FXR/RXR_Activation	0.315227
Ethanol_Degradation_IV	G_s_Signaling	0.315236
Bladder_Cancer_Signaling	Pregnenolone_Biosynthesis	0.315242
Estrogen_Receptor_Signaling	Coagulation_System	0.315251
Estrogen_Receptor_Signaling	VDR/RXR_Activation	0.315251
Retinoate_Biosynthesis_I	Human_Embryonic_Stem_Cell_Pluripotency	0.315261
Dopamine_Degradation	Tryptophan_Degradation_X_(Mammalian,_via_Tryptamine)	0.315268
Estrogen_Receptor_Signaling	Colorectal_Cancer_Metastasis_Signaling	0.315281
Fatty_Acid__-oxidation	Noradrenaline_and_Adrenaline_Degradation	0.315284
Human_Embryonic_Stem_Cell_Pluripotency	CXCR4_Signaling	0.315297
Retinoate_Biosynthesis_I	RAR_Activation	0.315299
Fatty_Acid__-oxidation	Acute_Phase_Response_Signaling	0.31533
Factors_Promoting_Cardiogenesis_in_Vertebrates	Eicosanoid_Signaling	0.315374
Estrogen_Receptor_Signaling	Thyroid_Cancer_Signaling	0.315382
Estrogen_Receptor_Signaling	Tight_Junction_Signaling	0.315382
Mitotic_Roles_of_Polo-Like_Kinase	Semaphorin_Signaling_in_Neurons	0.315383
Glioma_Invasiveness_Signaling	Pregnenolone_Biosynthesis	0.315394
Estrogen_Receptor_Signaling	Inhibition_of_Matrix_Metalloproteases	0.315396
Mitotic_Roles_of_Polo-Like_Kinase	Oxidative_Ethanol_Degradation_III	0.315453
FXR/RXR_Activation	Factors_Promoting_Cardiogenesis_in_Vertebrates	0.315456
Dopamine_Degradation	Superoxide_Radicals_Degradation	0.315461
Estrogen_Receptor_Signaling	Atherosclerosis_Signaling	0.315468
Estrogen_Receptor_Signaling	Role_of_Osteoblasts,_Osteoclasts_and_Chondrocytes_in_Rheumatoid_Arthritis	0.315468
Human_Embryonic_Stem_Cell_Pluripotency	Histamine_Degradation	0.315472
Oxidative_Ethanol_Degradation_III	Tryptophan_Degradation_X_(Mammalian,_via_Tryptamine)	0.315481
Putrescine_Degradation_III	Factors_Promoting_Cardiogenesis_in_Vertebrates	0.315482
Fatty_Acid__-oxidation	Semaphorin_Signaling_in_Neurons	0.315486
Ethanol_Degradation_IV	Oxidative_Ethanol_Degradation_III	0.315489
Glioma_Invasiveness_Signaling	Semaphorin_Signaling_in_Neurons	0.315492
Putrescine_Degradation_III	Superoxide_Radicals_Degradation	0.315492
Oxidative_Ethanol_Degradation_III	Superoxide_Radicals_Degradation	0.315495
RAR_Activation	G_s_Signaling	0.315529
Mitotic_Roles_of_Polo-Like_Kinase	Pregnenolone_Biosynthesis	0.315531
Estrogen_Receptor_Signaling	Ephrin_Receptor_Signaling	0.315537
Fatty_Acid__-oxidation	Assembly_of_RNA_Polymerase_II_Complex	0.315551
RAR_Activation	FXR/RXR_Activation	0.315559
Human_Embryonic_Stem_Cell_Pluripotency	Ethanol_Degradation_II	0.315572
Tryptophan_Degradation_X_(Mammalian,_via_Tryptamine)	Pregnenolone_Biosynthesis	0.315602
Factors_Promoting_Cardiogenesis_in_Vertebrates	Noradrenaline_and_Adrenaline_Degradation	0.315619
Superoxide_Radicals_Degradation	Semaphorin_Signaling_in_Neurons	0.315626
Glioma_Invasiveness_Signaling	Oxidative_Ethanol_Degradation_III	0.315629
Factors_Promoting_Cardiogenesis_in_Vertebrates	G_s_Signaling	0.315648
FXR/RXR_Activation	Superoxide_Radicals_Degradation	0.315649
Tryptophan_Degradation_X_(Mammalian,_via_Tryptamine)	Semaphorin_Signaling_in_Neurons	0.315653
Acute_Phase_Response_Signaling	Factors_Promoting_Cardiogenesis_in_Vertebrates	0.315664
RAR_Activation	Chondroitin_Sulfate_Biosynthesis	0.315669
Mitotic_Roles_of_Polo-Like_Kinase	Eicosanoid_Signaling	0.315674
Glioma_Invasiveness_Signaling	Eicosanoid_Signaling	0.315701
Dopamine_Degradation	Glioma_Invasiveness_Signaling	0.315702
Tryptophan_Degradation_X_(Mammalian,_via_Tryptamine)	FXR/RXR_Activation	0.315703
Glioma_Invasiveness_Signaling	FXR/RXR_Activation	0.315723
Human_Embryonic_Stem_Cell_Pluripotency	Chondroitin_Sulfate_Biosynthesis	0.31574
Estrogen_Receptor_Signaling	Protein_Ubiquitination_Pathway	0.315746
Tryptophan_Degradation_X_(Mammalian,_via_Tryptamine)	Eicosanoid_Signaling	0.315768
Superoxide_Radicals_Degradation	Eicosanoid_Signaling	0.315768
Ethanol_Degradation_IV	Assembly_of_RNA_Polymerase_II_Complex	0.31577
Human_Embryonic_Stem_Cell_Pluripotency	Protein_Ubiquitination_Pathway	0.315778
Mitotic_Roles_of_Polo-Like_Kinase	Acute_Phase_Response_Signaling	0.315798
Estrogen_Receptor_Signaling	Estrogen-mediated_S-phase_Entry	0.315802
Human_Embryonic_Stem_Cell_Pluripotency	TR/RXR_Activation	0.315814
Bladder_Cancer_Signaling	HIF1__Signaling	0.315825
Tryptophan_Degradation_X_(Mammalian,_via_Tryptamine)	Acute_Phase_Response_Signaling	0.315837
Mitotic_Roles_of_Polo-Like_Kinase	FXR/RXR_Activation	0.315856
Tryptophan_Degradation_X_(Mammalian,_via_Tryptamine)	Putrescine_Degradation_III	0.315897
Glioma_Invasiveness_Signaling	Acute_Phase_Response_Signaling	0.315931
Superoxide_Radicals_Degradation	Noradrenaline_and_Adrenaline_Degradation	0.315934
Regulation_of_Cellular_Mechanics_by_Calpain_Protease	Bladder_Cancer_Signaling	0.315946
Mitotic_Roles_of_Polo-Like_Kinase	Putrescine_Degradation_III	0.315961
Acute_Phase_Response_Signaling	Superoxide_Radicals_Degradation	0.315978
Assembly_of_RNA_Polymerase_II_Complex	Bladder_Cancer_Signaling	0.316
Tryptophan_Degradation_X_(Mammalian,_via_Tryptamine)	Noradrenaline_and_Adrenaline_Degradation	0.316001
Glioma_Invasiveness_Signaling	HIF1__Signaling	0.316005
Assembly_of_RNA_Polymerase_II_Complex	Factors_Promoting_Cardiogenesis_in_Vertebrates	0.316046
Mitotic_Roles_of_Polo-Like_Kinase	G_s_Signaling	0.316059
Estrogen_Receptor_Signaling	CD28_Signaling_in_T_Helper_Cells	0.316061
Regulation_of_Cellular_Mechanics_by_Calpain_Protease	Factors_Promoting_Cardiogenesis_in_Vertebrates	0.316066
Fatty_Acid__-oxidation	Regulation_of_Cellular_Mechanics_by_Calpain_Protease	0.316082
RAR_Activation	Chondroitin_Sulfate_Biosynthesis_(Late_Stages)	0.31609
HIF1__Signaling	Factors_Promoting_Cardiogenesis_in_Vertebrates	0.316099
Mitotic_Roles_of_Polo-Like_Kinase	Regulation_of_Cellular_Mechanics_by_Calpain_Protease	0.316101
Fatty_Acid__-oxidation	Retinoate_Biosynthesis_I	0.316107
Human_Embryonic_Stem_Cell_Pluripotency	Estrogen-Dependent_Breast_Cancer_Signaling	0.316129
Ethanol_Degradation_IV	Axonal_Guidance_Signaling	0.316136
Mitotic_Roles_of_Polo-Like_Kinase	HIF1__Signaling	0.31614
Estrogen_Receptor_Signaling	EIF2_Signaling	0.31615
Estrogen_Receptor_Signaling	Chemokine_Signaling	0.316162
Mitotic_Roles_of_Polo-Like_Kinase	Assembly_of_RNA_Polymerase_II_Complex	0.316163
Fatty_Acid__-oxidation	HIF1__Signaling	0.316192
Ethanol_Degradation_IV	Colorectal_Cancer_Metastasis_Signaling	0.316219
Human_Embryonic_Stem_Cell_Pluripotency	Pancreatic_Adenocarcinoma_Signaling	0.316223
Oxidative_Ethanol_Degradation_III	Semaphorin_Signaling_in_Neurons	0.31623
Human_Embryonic_Stem_Cell_Pluripotency	Intrinsic_Prothrombin_Activation_Pathway	0.316233
Ethanol_Degradation_IV	Chondroitin_Sulfate_Biosynthesis	0.316239
Regulation_of_Cellular_Mechanics_by_Calpain_Protease	Superoxide_Radicals_Degradation	0.316239
Glioma_Invasiveness_Signaling	Regulation_of_Cellular_Mechanics_by_Calpain_Protease	0.316259
Retinoate_Biosynthesis_I	Bladder_Cancer_Signaling	0.31627
HIF1__Signaling	Superoxide_Radicals_Degradation	0.316273
Tryptophan_Degradation_X_(Mammalian,_via_Tryptamine)	Assembly_of_RNA_Polymerase_II_Complex	0.316293
Assembly_of_RNA_Polymerase_II_Complex	Superoxide_Radicals_Degradation	0.316293
Glioma_Invasiveness_Signaling	Assembly_of_RNA_Polymerase_II_Complex	0.316313
Retinoate_Biosynthesis_I	Factors_Promoting_Cardiogenesis_in_Vertebrates	0.316318
Human_Embryonic_Stem_Cell_Pluripotency	Regulation_of_the_Epithelial-Mesenchymal_Transition_Pathway	0.316324
Fatty_Acid__-oxidation	G_s_Signaling	0.316338
Glioma_Invasiveness_Signaling	Putrescine_Degradation_III	0.31634
Dopamine_Degradation	Oxidative_Ethanol_Degradation_III	0.316344
Oxidative_Ethanol_Degradation_III	Putrescine_Degradation_III	0.316353
Dopamine_Degradation	Retinoate_Biosynthesis_I	0.316357
Mitotic_Roles_of_Polo-Like_Kinase	Factors_Promoting_Cardiogenesis_in_Vertebrates	0.316376
Human_Embryonic_Stem_Cell_Pluripotency	Cardiac__-adrenergic_Signaling	0.316411
Pregnenolone_Biosynthesis	Semaphorin_Signaling_in_Neurons	0.316418
Superoxide_Radicals_Degradation	Pregnenolone_Biosynthesis	0.316434
Dopamine_Degradation	Pregnenolone_Biosynthesis	0.316434
Acute_Phase_Response_Signaling	Bladder_Cancer_Signaling	0.316469
Mitotic_Roles_of_Polo-Like_Kinase	RAR_Activation	0.31648
FXR/RXR_Activation	Semaphorin_Signaling_in_Neurons	0.316485
Bladder_Cancer_Signaling	G_s_Signaling	0.316494
RAR_Activation	Colorectal_Cancer_Metastasis_Signaling	0.316511
Human_Embryonic_Stem_Cell_Pluripotency	Triacylglycerol_Biosynthesis	0.316525
Human_Embryonic_Stem_Cell_Pluripotency	Basal_Cell_Carcinoma_Signaling	0.316525
Human_Embryonic_Stem_Cell_Pluripotency	Heparan_Sulfate_Biosynthesis	0.316525
Human_Embryonic_Stem_Cell_Pluripotency	Heparan_Sulfate_Biosynthesis_(Late_Stages)	0.316525
Human_Embryonic_Stem_Cell_Pluripotency	Wnt/_-catenin_Signaling	0.316525
Dopamine_Degradation	FXR/RXR_Activation	0.316538
Human_Embryonic_Stem_Cell_Pluripotency	Protein_Kinase_A_Signaling	0.316538
Tryptophan_Degradation_X_(Mammalian,_via_Tryptamine)	HIF1__Signaling	0.316541
Ethanol_Degradation_IV	CXCR4_Signaling	0.316548
Putrescine_Degradation_III	Semaphorin_Signaling_in_Neurons	0.316579
Estrogen_Receptor_Signaling	LPS/IL-1_Mediated_Inhibition_of_RXR_Function	0.316584
FXR/RXR_Activation	Pregnenolone_Biosynthesis	0.316595
Dopamine_Degradation	Eicosanoid_Signaling	0.316605
RAR_Activation	CXCR4_Signaling	0.316635
Retinoate_Biosynthesis_I	Superoxide_Radicals_Degradation	0.316641
Semaphorin_Signaling_in_Neurons	Eicosanoid_Signaling	0.31665
Ethanol_Degradation_IV	Histamine_Degradation	0.316669
Fatty_Acid__-oxidation	Chondroitin_Sulfate_Biosynthesis	0.316669
Semaphorin_Signaling_in_Neurons	Noradrenaline_and_Adrenaline_Degradation	0.316695
Bladder_Cancer_Signaling	Chondroitin_Sulfate_Biosynthesis	0.316711
Oxidative_Ethanol_Degradation_III	Acute_Phase_Response_Signaling	0.316716
Tryptophan_Degradation_X_(Mammalian,_via_Tryptamine)	Regulation_of_Cellular_Mechanics_by_Calpain_Protease	0.316716
Pregnenolone_Biosynthesis	Noradrenaline_and_Adrenaline_Degradation	0.316718
Mitotic_Roles_of_Polo-Like_Kinase	Retinoate_Biosynthesis_I	0.316724
Glioma_Invasiveness_Signaling	Noradrenaline_and_Adrenaline_Degradation	0.316725
Human_Embryonic_Stem_Cell_Pluripotency	Leukocyte_Extravasation_Signaling	0.316739
Retinoate_Biosynthesis_I	Tryptophan_Degradation_X_(Mammalian,_via_Tryptamine)	0.316745
Ethanol_Degradation_IV	Protein_Ubiquitination_Pathway	0.316754
Oxidative_Ethanol_Degradation_III	Noradrenaline_and_Adrenaline_Degradation	0.316759
Human_Embryonic_Stem_Cell_Pluripotency	G_Beta_Gamma_Signaling	0.31676
Human_Embryonic_Stem_Cell_Pluripotency	Thrombin_Signaling	0.31676
Ethanol_Degradation_IV	Ethanol_Degradation_II	0.316769
Dopamine_Degradation	Putrescine_Degradation_III	0.316793
Acute_Phase_Response_Signaling	Semaphorin_Signaling_in_Neurons	0.316793
Oxidative_Ethanol_Degradation_III	Eicosanoid_Signaling	0.316801
Estrogen_Receptor_Signaling	Hepatic_Fibrosis_/_Hepatic_Stellate_Cell_Activation	0.316812
FXR/RXR_Activation	Eicosanoid_Signaling	0.316814
Oxidative_Ethanol_Degradation_III	FXR/RXR_Activation	0.316816
Glioma_Invasiveness_Signaling	G_s_Signaling	0.316817
Bladder_Cancer_Signaling	Noradrenaline_and_Adrenaline_Degradation	0.316826
Ethanol_Degradation_IV	TR/RXR_Activation	0.316843
Estrogen_Receptor_Signaling	Role_of_Macrophages,_Fibroblasts_and_Endothelial_Cells_in_Rheumatoid_Arthritis	0.316843
Axonal_Guidance_Signaling	Bladder_Cancer_Signaling	0.316855
Fatty_Acid__-oxidation	Chondroitin_Sulfate_Biosynthesis_(Late_Stages)	0.316876
Dopamine_Degradation	Noradrenaline_and_Adrenaline_Degradation	0.316879
Factors_Promoting_Cardiogenesis_in_Vertebrates	Chondroitin_Sulfate_Biosynthesis	0.316898
Acute_Phase_Response_Signaling	Pregnenolone_Biosynthesis	0.316903
Dopamine_Degradation	Acute_Phase_Response_Signaling	0.316924
Assembly_of_RNA_Polymerase_II_Complex	Semaphorin_Signaling_in_Neurons	0.316934
Acute_Phase_Response_Signaling	FXR/RXR_Activation	0.31695
Dopamine_Degradation	Assembly_of_RNA_Polymerase_II_Complex	0.316952
RAR_Activation	Histamine_Degradation	0.316953
RAR_Activation	TR/RXR_Activation	0.316959
Superoxide_Radicals_Degradation	G_s_Signaling	0.316968
Glioma_Invasiveness_Signaling	Retinoate_Biosynthesis_I	0.316972
FXR/RXR_Activation	Noradrenaline_and_Adrenaline_Degradation	0.31698
Axonal_Guidance_Signaling	Fatty_Acid__-oxidation	0.317027
Oxidative_Ethanol_Degradation_III	HIF1__Signaling	0.317031
RAR_Activation	Regulation_of_the_Epithelial-Mesenchymal_Transition_Pathway	0.317038
Tryptophan_Degradation_X_(Mammalian,_via_Tryptamine)	G_s_Signaling	0.317044
Oxidative_Ethanol_Degradation_III	Assembly_of_RNA_Polymerase_II_Complex	0.317051
RAR_Activation	Ethanol_Degradation_II	0.317056
Putrescine_Degradation_III	Eicosanoid_Signaling	0.317062
Tryptophan_Degradation_X_(Mammalian,_via_Tryptamine)	Chondroitin_Sulfate_Biosynthesis	0.317071
Superoxide_Radicals_Degradation	Chondroitin_Sulfate_Biosynthesis	0.317071
Bladder_Cancer_Signaling	Chondroitin_Sulfate_Biosynthesis_(Late_Stages)	0.317086
Acute_Phase_Response_Signaling	Eicosanoid_Signaling	0.317089
Glioma_Invasiveness_Signaling	Chondroitin_Sulfate_Biosynthesis	0.317091
Putrescine_Degradation_III	Noradrenaline_and_Adrenaline_Degradation	0.317094
Ethanol_Degradation_IV	Chondroitin_Sulfate_Biosynthesis_(Late_Stages)	0.317098
Regulation_of_Cellular_Mechanics_by_Calpain_Protease	Semaphorin_Signaling_in_Neurons	0.317122
Human_Embryonic_Stem_Cell_Pluripotency	Ephrin_B_Signaling	0.317149
Human_Embryonic_Stem_Cell_Pluripotency	Signaling_by_Rho_Family_GTPases	0.317149
HIF1__Signaling	Semaphorin_Signaling_in_Neurons	0.317155
Fatty_Acid__-oxidation	Colorectal_Cancer_Metastasis_Signaling	0.317159
Putrescine_Degradation_III	Pregnenolone_Biosynthesis	0.317165
Human_Embryonic_Stem_Cell_Pluripotency	Ephrin_Receptor_Signaling	0.317172
Human_Embryonic_Stem_Cell_Pluripotency	Granzyme_A_Signaling	0.317205
Intrinsic_Prothrombin_Activation_Pathway	RAR_Activation	0.317232
Assembly_of_RNA_Polymerase_II_Complex	Pregnenolone_Biosynthesis	0.317239
Acute_Phase_Response_Signaling	Putrescine_Degradation_III	0.317252
Putrescine_Degradation_III	FXR/RXR_Activation	0.317259
Factors_Promoting_Cardiogenesis_in_Vertebrates	Chondroitin_Sulfate_Biosynthesis_(Late_Stages)	0.317307
Human_Embryonic_Stem_Cell_Pluripotency	Coagulation_System	0.31731
Human_Embryonic_Stem_Cell_Pluripotency	VDR/RXR_Activation	0.31731
Regulation_of_Cellular_Mechanics_by_Calpain_Protease	Pregnenolone_Biosynthesis	0.317319
Ethanol_Degradation_IV	Estrogen-Dependent_Breast_Cancer_Signaling	0.317326
Axonal_Guidance_Signaling	RAR_Activation	0.317328
Mitotic_Roles_of_Polo-Like_Kinase	Chondroitin_Sulfate_Biosynthesis	0.317337
Oxidative_Ethanol_Degradation_III	Pregnenolone_Biosynthesis	0.317339
Factors_Promoting_Cardiogenesis_in_Vertebrates	Colorectal_Cancer_Metastasis_Signaling	0.31734
Regulation_of_Cellular_Mechanics_by_Calpain_Protease	Eicosanoid_Signaling	0.317351
Regulation_of_Cellular_Mechanics_by_Calpain_Protease	FXR/RXR_Activation	0.317353
HIF1__Signaling	Pregnenolone_Biosynthesis	0.317353
Acute_Phase_Response_Signaling	Noradrenaline_and_Adrenaline_Degradation	0.317356
Retinoate_Biosynthesis_I	Semaphorin_Signaling_in_Neurons	0.317356
Human_Embryonic_Stem_Cell_Pluripotency	Thyroid_Cancer_Signaling	0.317363
Human_Embryonic_Stem_Cell_Pluripotency	Tight_Junction_Signaling	0.317363
Assembly_of_RNA_Polymerase_II_Complex	Eicosanoid_Signaling	0.317371
Regulation_of_Cellular_Mechanics_by_Calpain_Protease	Putrescine_Degradation_III	0.31738
HIF1__Signaling	Eicosanoid_Signaling	0.317384
FXR/RXR_Activation	HIF1__Signaling	0.317386
Oxidative_Ethanol_Degradation_III	Regulation_of_Cellular_Mechanics_by_Calpain_Protease	0.3174
Ethanol_Degradation_IV	Cardiac__-adrenergic_Signaling	0.317406
Assembly_of_RNA_Polymerase_II_Complex	FXR/RXR_Activation	0.317406
RAR_Activation	Pancreatic_Adenocarcinoma_Signaling	0.317415
Ethanol_Degradation_IV	Triacylglycerol_Biosynthesis	0.31742
Ethanol_Degradation_IV	Basal_Cell_Carcinoma_Signaling	0.31742
Ethanol_Degradation_IV	Heparan_Sulfate_Biosynthesis	0.31742
Ethanol_Degradation_IV	Heparan_Sulfate_Biosynthesis_(Late_Stages)	0.31742
Ethanol_Degradation_IV	Wnt/_-catenin_Signaling	0.31742
Fatty_Acid__-oxidation	CXCR4_Signaling	0.317421
Axonal_Guidance_Signaling	Factors_Promoting_Cardiogenesis_in_Vertebrates	0.31743
Putrescine_Degradation_III	Assembly_of_RNA_Polymerase_II_Complex	0.317433
Superoxide_Radicals_Degradation	Chondroitin_Sulfate_Biosynthesis_(Late_Stages)	0.317447
Ethanol_Degradation_IV	Regulation_of_the_Epithelial-Mesenchymal_Transition_Pathway	0.317453
Bladder_Cancer_Signaling	Colorectal_Cancer_Metastasis_Signaling	0.317469
Dopamine_Degradation	Regulation_of_Cellular_Mechanics_by_Calpain_Protease	0.317469
Ethanol_Degradation_IV	Intrinsic_Prothrombin_Activation_Pathway	0.317472
Glioma_Invasiveness_Signaling	Chondroitin_Sulfate_Biosynthesis_(Late_Stages)	0.3175
Regulation_of_Cellular_Mechanics_by_Calpain_Protease	Noradrenaline_and_Adrenaline_Degradation	0.317517
Oxidative_Ethanol_Degradation_III	Retinoate_Biosynthesis_I	0.317524
Mitotic_Roles_of_Polo-Like_Kinase	Chondroitin_Sulfate_Biosynthesis_(Late_Stages)	0.317539
RAR_Activation	Cardiac__-adrenergic_Signaling	0.317539
Bladder_Cancer_Signaling	CXCR4_Signaling	0.317549
HIF1__Signaling	Noradrenaline_and_Adrenaline_Degradation	0.31755
Regulation_of_Cellular_Mechanics_by_Calpain_Protease	Acute_Phase_Response_Signaling	0.317561
Assembly_of_RNA_Polymerase_II_Complex	Noradrenaline_and_Adrenaline_Degradation	0.31757
Dopamine_Degradation	Semaphorin_Signaling_in_Neurons	0.317573
Axonal_Guidance_Signaling	Semaphorin_Signaling_in_Neurons	0.317579
Human_Embryonic_Stem_Cell_Pluripotency	Atherosclerosis_Signaling	0.317594
Human_Embryonic_Stem_Cell_Pluripotency	Role_of_Osteoblasts,_Osteoclasts_and_Chondrocytes_in_Rheumatoid_Arthritis	0.317594
Factors_Promoting_Cardiogenesis_in_Vertebrates	CXCR4_Signaling	0.317595
Fatty_Acid__-oxidation	Histamine_Degradation	0.3176
Ethanol_Degradation_IV	Protein_Kinase_A_Signaling	0.317601
Human_Embryonic_Stem_Cell_Pluripotency	Inhibition_of_Matrix_Metalloproteases	0.317605
Glioma_Invasiveness_Signaling	Colorectal_Cancer_Metastasis_Signaling	0.317608
Superoxide_Radicals_Degradation	Colorectal_Cancer_Metastasis_Signaling	0.317621
RAR_Activation	Estrogen-Dependent_Breast_Cancer_Signaling	0.317629
Human_Embryonic_Stem_Cell_Pluripotency	Estrogen-mediated_S-phase_Entry	0.317653
Oxidative_Ethanol_Degradation_III	G_s_Signaling	0.317672
G_s_Signaling	Pregnenolone_Biosynthesis	0.317686
Fatty_Acid__-oxidation	Ethanol_Degradation_II	0.317704
G_s_Signaling	Semaphorin_Signaling_in_Neurons	0.317704
Retinoate_Biosynthesis_I	Eicosanoid_Signaling	0.317709
Retinoate_Biosynthesis_I	FXR/RXR_Activation	0.317718
Tryptophan_Degradation_X_(Mammalian,_via_Tryptamine)	Colorectal_Cancer_Metastasis_Signaling	0.317722
Bladder_Cancer_Signaling	Histamine_Degradation	0.317723
Mitotic_Roles_of_Polo-Like_Kinase	Colorectal_Cancer_Metastasis_Signaling	0.317741
Fatty_Acid__-oxidation	TR/RXR_Activation	0.317745
Pregnenolone_Biosynthesis	Eicosanoid_Signaling	0.317767
Factors_Promoting_Cardiogenesis_in_Vertebrates	Histamine_Degradation	0.317769
Retinoate_Biosynthesis_I	Pregnenolone_Biosynthesis	0.317773
RAR_Activation	Protein_Kinase_A_Signaling	0.317774
Fatty_Acid__-oxidation	Cardiac__-adrenergic_Signaling	0.317802
Bladder_Cancer_Signaling	Ethanol_Degradation_II	0.317824
Axonal_Guidance_Signaling	Superoxide_Radicals_Degradation	0.317831
Glioma_Invasiveness_Signaling	Axonal_Guidance_Signaling	0.317855
Glioma_Invasiveness_Signaling	CXCR4_Signaling	0.317862
RAR_Activation	Triacylglycerol_Biosynthesis	0.317864
RAR_Activation	Basal_Cell_Carcinoma_Signaling	0.317864
RAR_Activation	Heparan_Sulfate_Biosynthesis	0.317864
RAR_Activation	Heparan_Sulfate_Biosynthesis_(Late_Stages)	0.317864
RAR_Activation	Wnt/_-catenin_Signaling	0.317864
Ethanol_Degradation_IV	Leukocyte_Extravasation_Signaling	0.317869
Factors_Promoting_Cardiogenesis_in_Vertebrates	Ethanol_Degradation_II	0.31787
Ethanol_Degradation_IV	G_Beta_Gamma_Signaling	0.317889
Ethanol_Degradation_IV	Thrombin_Signaling	0.317889
Oxidative_Ethanol_Degradation_III	Chondroitin_Sulfate_Biosynthesis	0.317896
Regulation_of_Cellular_Mechanics_by_Calpain_Protease	HIF1__Signaling	0.317923
Superoxide_Radicals_Degradation	CXCR4_Signaling	0.317929
FXR/RXR_Activation	G_s_Signaling	0.317941
Regulation_of_Cellular_Mechanics_by_Calpain_Protease	Assembly_of_RNA_Polymerase_II_Complex	0.317943
Assembly_of_RNA_Polymerase_II_Complex	HIF1__Signaling	0.317943
Semaphorin_Signaling_in_Neurons	Chondroitin_Sulfate_Biosynthesis	0.317953
Retinoate_Biosynthesis_I	Putrescine_Degradation_III	0.317973
Tryptophan_Degradation_X_(Mammalian,_via_Tryptamine)	CXCR4_Signaling	0.317976
Dopamine_Degradation	HIF1__Signaling	0.31798
Retinoate_Biosynthesis_I	Noradrenaline_and_Adrenaline_Degradation	0.317983
Putrescine_Degradation_III	G_s_Signaling	0.317983
Ethanol_Degradation_IV	Granzyme_A_Signaling	0.31799
Dopamine_Degradation	G_s_Signaling	0.318
G_s_Signaling	Eicosanoid_Signaling	0.318008
Factors_Promoting_Cardiogenesis_in_Vertebrates	TR/RXR_Activation	0.318011
RAR_Activation	Leukocyte_Extravasation_Signaling	0.318015
Bladder_Cancer_Signaling	TR/RXR_Activation	0.318032
Mitotic_Roles_of_Polo-Like_Kinase	CXCR4_Signaling	0.318036
Glioma_Invasiveness_Signaling	Histamine_Degradation	0.318037
Eicosanoid_Signaling	Noradrenaline_and_Adrenaline_Degradation	0.318043
Superoxide_Radicals_Degradation	Histamine_Degradation	0.31805
Ethanol_Degradation_IV	Pancreatic_Adenocarcinoma_Signaling	0.318084
Protein_Ubiquitination_Pathway	Bladder_Cancer_Signaling	0.318084
Retinoate_Biosynthesis_I	Acute_Phase_Response_Signaling	0.318104
G_s_Signaling	Noradrenaline_and_Adrenaline_Degradation	0.318124
RAR_Activation	Granzyme_A_Signaling	0.31814
Tryptophan_Degradation_X_(Mammalian,_via_Tryptamine)	Histamine_Degradation	0.318151
Superoxide_Radicals_Degradation	Ethanol_Degradation_II	0.318151
Pregnenolone_Biosynthesis	Chondroitin_Sulfate_Biosynthesis	0.318151
Protein_Ubiquitination_Pathway	Superoxide_Radicals_Degradation	0.318162
Human_Embryonic_Stem_Cell_Pluripotency	CD28_Signaling_in_T_Helper_Cells	0.318171
Chondroitin_Sulfate_Biosynthesis	Eicosanoid_Signaling	0.318182
Putrescine_Degradation_III	HIF1__Signaling	0.318184
Fatty_Acid__-oxidation	Pancreatic_Adenocarcinoma_Signaling	0.318201
Ethanol_Degradation_IV	Ephrin_B_Signaling	0.318225
Ethanol_Degradation_IV	Signaling_by_Rho_Family_GTPases	0.318225
RAR_Activation	G_Beta_Gamma_Signaling	0.318229
RAR_Activation	Thrombin_Signaling	0.318229
Mitotic_Roles_of_Polo-Like_Kinase	Histamine_Degradation	0.318238
Oxidative_Ethanol_Degradation_III	Chondroitin_Sulfate_Biosynthesis_(Late_Stages)	0.318238
Tryptophan_Degradation_X_(Mammalian,_via_Tryptamine)	Chondroitin_Sulfate_Biosynthesis_(Late_Stages)	0.318251
Tryptophan_Degradation_X_(Mammalian,_via_Tryptamine)	Ethanol_Degradation_II	0.318251
FXR/RXR_Activation	Chondroitin_Sulfate_Biosynthesis	0.318258
Fatty_Acid__-oxidation	Estrogen-Dependent_Breast_Cancer_Signaling	0.318277
Human_Embryonic_Stem_Cell_Pluripotency	EIF2_Signaling	0.31829
Acute_Phase_Response_Signaling	HIF1__Signaling	0.318298
Retinoate_Biosynthesis_I	HIF1__Signaling	0.318304
Putrescine_Degradation_III	Chondroitin_Sulfate_Biosynthesis	0.318312
Fatty_Acid__-oxidation	Triacylglycerol_Biosynthesis	0.318318
Fatty_Acid__-oxidation	Basal_Cell_Carcinoma_Signaling	0.318318
Fatty_Acid__-oxidation	Heparan_Sulfate_Biosynthesis	0.318318
Fatty_Acid__-oxidation	Heparan_Sulfate_Biosynthesis_(Late_Stages)	0.318318
Fatty_Acid__-oxidation	Wnt/_-catenin_Signaling	0.318318
Tryptophan_Degradation_X_(Mammalian,_via_Tryptamine)	TR/RXR_Activation	0.318325
Human_Embryonic_Stem_Cell_Pluripotency	Chemokine_Signaling	0.318325
Ethanol_Degradation_IV	Ephrin_Receptor_Signaling	0.318335
Chondroitin_Sulfate_Biosynthesis	Noradrenaline_and_Adrenaline_Degradation	0.318348
Acute_Phase_Response_Signaling	Assembly_of_RNA_Polymerase_II_Complex	0.318352
Mitotic_Roles_of_Polo-Like_Kinase	Ethanol_Degradation_II	0.318354
Semaphorin_Signaling_in_Neurons	Chondroitin_Sulfate_Biosynthesis_(Late_Stages)	0.318363
Protein_Ubiquitination_Pathway	Factors_Promoting_Cardiogenesis_in_Vertebrates	0.318368
Fatty_Acid__-oxidation	Regulation_of_the_Epithelial-Mesenchymal_Transition_Pathway	0.318373
Bladder_Cancer_Signaling	Pancreatic_Adenocarcinoma_Signaling	0.318374
Bladder_Cancer_Signaling	Estrogen-Dependent_Breast_Cancer_Signaling	0.318381
Glioma_Invasiveness_Signaling	Protein_Ubiquitination_Pathway	0.318381
Acute_Phase_Response_Signaling	Chondroitin_Sulfate_Biosynthesis	0.318392
Glioma_Invasiveness_Signaling	TR/RXR_Activation	0.318399
Acute_Phase_Response_Signaling	G_s_Signaling	0.318404
Ethanol_Degradation_IV	Coagulation_System	0.318406
Ethanol_Degradation_IV	VDR/RXR_Activation	0.318406
Fatty_Acid__-oxidation	Intrinsic_Prothrombin_Activation_Pathway	0.318407
Mitotic_Roles_of_Polo-Like_Kinase	Axonal_Guidance_Signaling	0.318414
Pregnenolone_Biosynthesis	Chondroitin_Sulfate_Biosynthesis_(Late_Stages)	0.318426
Factors_Promoting_Cardiogenesis_in_Vertebrates	Estrogen-Dependent_Breast_Cancer_Signaling	0.318427
Semaphorin_Signaling_in_Neurons	Colorectal_Cancer_Metastasis_Signaling	0.31847
Regulation_of_Cellular_Mechanics_by_Calpain_Protease	G_s_Signaling	0.318494
RAR_Activation	Ephrin_Receptor_Signaling	0.318495
Bladder_Cancer_Signaling	Triacylglycerol_Biosynthesis	0.318522
Bladder_Cancer_Signaling	Basal_Cell_Carcinoma_Signaling	0.318522
Bladder_Cancer_Signaling	Heparan_Sulfate_Biosynthesis	0.318522
Bladder_Cancer_Signaling	Heparan_Sulfate_Biosynthesis_(Late_Stages)	0.318522
Bladder_Cancer_Signaling	Wnt/_-catenin_Signaling	0.318522
HIF1__Signaling	G_s_Signaling	0.318528
Oxidative_Ethanol_Degradation_III	Colorectal_Cancer_Metastasis_Signaling	0.318547
RAR_Activation	Coagulation_System	0.318547
RAR_Activation	VDR/RXR_Activation	0.318547
Chondroitin_Sulfate_Biosynthesis_(Late_Stages)	Eicosanoid_Signaling	0.318558
Fatty_Acid__-oxidation	Protein_Kinase_A_Signaling	0.31856
Axonal_Guidance_Signaling	Oxidative_Ethanol_Degradation_III	0.318566
Mitotic_Roles_of_Polo-Like_Kinase	TR/RXR_Activation	0.318583
Ethanol_Degradation_IV	Thyroid_Cancer_Signaling	0.318587
Ethanol_Degradation_IV	Tight_Junction_Signaling	0.318587
Factors_Promoting_Cardiogenesis_in_Vertebrates	Pancreatic_Adenocarcinoma_Signaling	0.318594
Pregnenolone_Biosynthesis	Colorectal_Cancer_Metastasis_Signaling	0.3186
Dopamine_Degradation	Axonal_Guidance_Signaling	0.318608
Putrescine_Degradation_III	Chondroitin_Sulfate_Biosynthesis_(Late_Stages)	0.31862
Factors_Promoting_Cardiogenesis_in_Vertebrates	Regulation_of_the_Epithelial-Mesenchymal_Transition_Pathway	0.318621
Estrogen_Receptor_Signaling	Granulocyte_Adhesion_and_Diapedesis	0.318627
Oxidative_Ethanol_Degradation_III	CXCR4_Signaling	0.318634
RAR_Activation	Thyroid_Cancer_Signaling	0.318636
RAR_Activation	Tight_Junction_Signaling	0.318636
Ethanol_Degradation_IV	Inhibition_of_Matrix_Metalloproteases	0.31864
Dopamine_Degradation	Colorectal_Cancer_Metastasis_Signaling	0.318649
Retinoate_Biosynthesis_I	Regulation_of_Cellular_Mechanics_by_Calpain_Protease	0.318649
Mitotic_Roles_of_Polo-Like_Kinase	Triacylglycerol_Biosynthesis	0.318681
Mitotic_Roles_of_Polo-Like_Kinase	Basal_Cell_Carcinoma_Signaling	0.318681
Mitotic_Roles_of_Polo-Like_Kinase	Heparan_Sulfate_Biosynthesis	0.318681
Mitotic_Roles_of_Polo-Like_Kinase	Heparan_Sulfate_Biosynthesis_(Late_Stages)	0.318681
Mitotic_Roles_of_Polo-Like_Kinase	Wnt/_-catenin_Signaling	0.318681
Glioma_Invasiveness_Signaling	Ethanol_Degradation_II	0.318694
Glioma_Invasiveness_Signaling	Estrogen-Dependent_Breast_Cancer_Signaling	0.318694
Bladder_Cancer_Signaling	Regulation_of_the_Epithelial-Mesenchymal_Transition_Pathway	0.318696
FXR/RXR_Activation	Colorectal_Cancer_Metastasis_Signaling	0.318701
Dopamine_Degradation	Chondroitin_Sulfate_Biosynthesis	0.318705
Superoxide_Radicals_Degradation	Estrogen-Dependent_Breast_Cancer_Signaling	0.318707
Factors_Promoting_Cardiogenesis_in_Vertebrates	Triacylglycerol_Biosynthesis	0.318708
Factors_Promoting_Cardiogenesis_in_Vertebrates	Basal_Cell_Carcinoma_Signaling	0.318708
Factors_Promoting_Cardiogenesis_in_Vertebrates	Heparan_Sulfate_Biosynthesis	0.318708
Factors_Promoting_Cardiogenesis_in_Vertebrates	Heparan_Sulfate_Biosynthesis_(Late_Stages)	0.318708
Factors_Promoting_Cardiogenesis_in_Vertebrates	Wnt/_-catenin_Signaling	0.318708
FXR/RXR_Activation	Chondroitin_Sulfate_Biosynthesis_(Late_Stages)	0.318714
Factors_Promoting_Cardiogenesis_in_Vertebrates	Cardiac__-adrenergic_Signaling	0.318715
Bladder_Cancer_Signaling	Cardiac__-adrenergic_Signaling	0.318716
Regulation_of_Cellular_Mechanics_by_Calpain_Protease	Chondroitin_Sulfate_Biosynthesis	0.318721
Eicosanoid_Signaling	Colorectal_Cancer_Metastasis_Signaling	0.318732
HIF1__Signaling	Chondroitin_Sulfate_Biosynthesis	0.318754
Chondroitin_Sulfate_Biosynthesis_(Late_Stages)	Noradrenaline_and_Adrenaline_Degradation	0.318757
Axonal_Guidance_Signaling	Pregnenolone_Biosynthesis	0.318764
Tryptophan_Degradation_X_(Mammalian,_via_Tryptamine)	Pancreatic_Adenocarcinoma_Signaling	0.318768
Superoxide_Radicals_Degradation	Pancreatic_Adenocarcinoma_Signaling	0.318768
Intrinsic_Prothrombin_Activation_Pathway	Factors_Promoting_Cardiogenesis_in_Vertebrates	0.31877
RAR_Activation	Ephrin_B_Signaling	0.318771
RAR_Activation	Signaling_by_Rho_Family_GTPases	0.318771
Assembly_of_RNA_Polymerase_II_Complex	Chondroitin_Sulfate_Biosynthesis	0.318775
Putrescine_Degradation_III	Colorectal_Cancer_Metastasis_Signaling	0.318795
Fatty_Acid__-oxidation	G_Beta_Gamma_Signaling	0.318801
Fatty_Acid__-oxidation	Leukocyte_Extravasation_Signaling	0.318801
Fatty_Acid__-oxidation	Thrombin_Signaling	0.318801
Glioma_Invasiveness_Signaling	Triacylglycerol_Biosynthesis	0.318801
Glioma_Invasiveness_Signaling	Basal_Cell_Carcinoma_Signaling	0.318801
Glioma_Invasiveness_Signaling	Heparan_Sulfate_Biosynthesis	0.318801
Glioma_Invasiveness_Signaling	Heparan_Sulfate_Biosynthesis_(Late_Stages)	0.318801
Glioma_Invasiveness_Signaling	Wnt/_-catenin_Signaling	0.318801
Acute_Phase_Response_Signaling	Chondroitin_Sulfate_Biosynthesis_(Late_Stages)	0.318801
Factors_Promoting_Cardiogenesis_in_Vertebrates	Protein_Kinase_A_Signaling	0.318802
Tryptophan_Degradation_X_(Mammalian,_via_Tryptamine)	Estrogen-Dependent_Breast_Cancer_Signaling	0.318808
Ethanol_Degradation_IV	Atherosclerosis_Signaling	0.318811
Ethanol_Degradation_IV	Role_of_Osteoblasts,_Osteoclasts_and_Chondrocytes_in_Rheumatoid_Arthritis	0.318811
Glioma_Invasiveness_Signaling	Pancreatic_Adenocarcinoma_Signaling	0.318821
Pregnenolone_Biosynthesis	CXCR4_Signaling	0.318821
Bladder_Cancer_Signaling	Protein_Kinase_A_Signaling	0.318823
Protein_Ubiquitination_Pathway	RAR_Activation	0.318827
Tryptophan_Degradation_X_(Mammalian,_via_Tryptamine)	Triacylglycerol_Biosynthesis	0.318848
Tryptophan_Degradation_X_(Mammalian,_via_Tryptamine)	Basal_Cell_Carcinoma_Signaling	0.318848
Tryptophan_Degradation_X_(Mammalian,_via_Tryptamine)	Heparan_Sulfate_Biosynthesis	0.318848
Tryptophan_Degradation_X_(Mammalian,_via_Tryptamine)	Heparan_Sulfate_Biosynthesis_(Late_Stages)	0.318848
Tryptophan_Degradation_X_(Mammalian,_via_Tryptamine)	Wnt/_-catenin_Signaling	0.318848
Glioma_Invasiveness_Signaling	Regulation_of_the_Epithelial-Mesenchymal_Transition_Pathway	0.318855
Superoxide_Radicals_Degradation	Cardiac__-adrenergic_Signaling	0.318855
Glioma_Invasiveness_Signaling	Intrinsic_Prothrombin_Activation_Pathway	0.318868
Human_Embryonic_Stem_Cell_Pluripotency	LPS/IL-1_Mediated_Inhibition_of_RXR_Function	0.318881
Superoxide_Radicals_Degradation	Triacylglycerol_Biosynthesis	0.318882
Superoxide_Radicals_Degradation	Basal_Cell_Carcinoma_Signaling	0.318882
Superoxide_Radicals_Degradation	Heparan_Sulfate_Biosynthesis	0.318882
Superoxide_Radicals_Degradation	Heparan_Sulfate_Biosynthesis_(Late_Stages)	0.318882
Superoxide_Radicals_Degradation	Wnt/_-catenin_Signaling	0.318882
Tryptophan_Degradation_X_(Mammalian,_via_Tryptamine)	Cardiac__-adrenergic_Signaling	0.318889
Semaphorin_Signaling_in_Neurons	Histamine_Degradation	0.318899
Superoxide_Radicals_Degradation	Regulation_of_the_Epithelial-Mesenchymal_Transition_Pathway	0.318902
Glioma_Invasiveness_Signaling	Cardiac__-adrenergic_Signaling	0.318909
Dopamine_Degradation	CXCR4_Signaling	0.318912
RAR_Activation	Inhibition_of_Matrix_Metalloproteases	0.318913
Axonal_Guidance_Signaling	Tryptophan_Degradation_X_(Mammalian,_via_Tryptamine)	0.318921
Fatty_Acid__-oxidation	Granzyme_A_Signaling	0.318925
RAR_Activation	Atherosclerosis_Signaling	0.318929
RAR_Activation	Role_of_Osteoblasts,_Osteoclasts_and_Chondrocytes_in_Rheumatoid_Arthritis	0.318929
Noradrenaline_and_Adrenaline_Degradation	Colorectal_Cancer_Metastasis_Signaling	0.318932
Mitotic_Roles_of_Polo-Like_Kinase	Protein_Ubiquitination_Pathway	0.318935
Tryptophan_Degradation_X_(Mammalian,_via_Tryptamine)	Regulation_of_the_Epithelial-Mesenchymal_Transition_Pathway	0.318936
Oxidative_Ethanol_Degradation_III	Histamine_Degradation	0.318942
FXR/RXR_Activation	CXCR4_Signaling	0.318956
Bladder_Cancer_Signaling	Leukocyte_Extravasation_Signaling	0.318958
Human_Embryonic_Stem_Cell_Pluripotency	Hepatic_Fibrosis_/_Hepatic_Stellate_Cell_Activation	0.318964
Estrogen-mediated_S-phase_Entry	RAR_Activation	0.318967
Axonal_Guidance_Signaling	Putrescine_Degradation_III	0.31897
Oxidative_Ethanol_Degradation_III	Protein_Ubiquitination_Pathway	0.318986
Mitotic_Roles_of_Polo-Like_Kinase	Estrogen-Dependent_Breast_Cancer_Signaling	0.318999
Semaphorin_Signaling_in_Neurons	Ethanol_Degradation_II	0.319
Factors_Promoting_Cardiogenesis_in_Vertebrates	Leukocyte_Extravasation_Signaling	0.319004
Oxidative_Ethanol_Degradation_III	Ethanol_Degradation_II	0.319009
Axonal_Guidance_Signaling	Assembly_of_RNA_Polymerase_II_Complex	0.319013
Axonal_Guidance_Signaling	FXR/RXR_Activation	0.319013
Putrescine_Degradation_III	CXCR4_Signaling	0.319016
Eicosanoid_Signaling	CXCR4_Signaling	0.319021
Protein_Ubiquitination_Pathway	Pregnenolone_Biosynthesis	0.319021
Intrinsic_Prothrombin_Activation_Pathway	Superoxide_Radicals_Degradation	0.319024
Pregnenolone_Biosynthesis	Histamine_Degradation	0.319029
Glioma_Invasiveness_Signaling	Protein_Kinase_A_Signaling	0.319036
Bladder_Cancer_Signaling	G_Beta_Gamma_Signaling	0.319045
Bladder_Cancer_Signaling	Thrombin_Signaling	0.319045
Dopamine_Degradation	Chondroitin_Sulfate_Biosynthesis_(Late_Stages)	0.31905
Factors_Promoting_Cardiogenesis_in_Vertebrates	G_Beta_Gamma_Signaling	0.319057
Factors_Promoting_Cardiogenesis_in_Vertebrates	Thrombin_Signaling	0.319057
Bladder_Cancer_Signaling	Granzyme_A_Signaling	0.319078
Oxidative_Ethanol_Degradation_III	TR/RXR_Activation	0.319083
Dopamine_Degradation	Histamine_Degradation	0.319091
Mitotic_Roles_of_Polo-Like_Kinase	Pancreatic_Adenocarcinoma_Signaling	0.319096
Assembly_of_RNA_Polymerase_II_Complex	G_s_Signaling	0.319101
Tryptophan_Degradation_X_(Mammalian,_via_Tryptamine)	Intrinsic_Prothrombin_Activation_Pathway	0.319102
Axonal_Guidance_Signaling	Noradrenaline_and_Adrenaline_Degradation	0.319116
Tryptophan_Degradation_X_(Mammalian,_via_Tryptamine)	Protein_Kinase_A_Signaling	0.319117
Factors_Promoting_Cardiogenesis_in_Vertebrates	Granzyme_A_Signaling	0.319124
Regulation_of_Cellular_Mechanics_by_Calpain_Protease	Chondroitin_Sulfate_Biosynthesis_(Late_Stages)	0.31913
FXR/RXR_Activation	Histamine_Degradation	0.31913
Pregnenolone_Biosynthesis	TR/RXR_Activation	0.31913
Pregnenolone_Biosynthesis	Ethanol_Degradation_II	0.31913
Axonal_Guidance_Signaling	Eicosanoid_Signaling	0.319139
Semaphorin_Signaling_in_Neurons	TR/RXR_Activation	0.319141
Noradrenaline_and_Adrenaline_Degradation	CXCR4_Signaling	0.319153
Intrinsic_Prothrombin_Activation_Pathway	Bladder_Cancer_Signaling	0.319159
HIF1__Signaling	Chondroitin_Sulfate_Biosynthesis_(Late_Stages)	0.319164
Human_Embryonic_Stem_Cell_Pluripotency	Role_of_Macrophages,_Fibroblasts_and_Endothelial_Cells_in_Rheumatoid_Arthritis	0.319167
Assembly_of_RNA_Polymerase_II_Complex	Chondroitin_Sulfate_Biosynthesis_(Late_Stages)	0.319184
Dopamine_Degradation	Protein_Ubiquitination_Pathway	0.319186
Putrescine_Degradation_III	Histamine_Degradation	0.31919
Dopamine_Degradation	Ethanol_Degradation_II	0.319195
Eicosanoid_Signaling	Histamine_Degradation	0.319195
Retinoate_Biosynthesis_I	G_s_Signaling	0.319215
Fatty_Acid__-oxidation	Protein_Ubiquitination_Pathway	0.319222
Ethanol_Degradation_IV	Estrogen-mediated_S-phase_Entry	0.319226
Retinoate_Biosynthesis_I	Chondroitin_Sulfate_Biosynthesis	0.319229
FXR/RXR_Activation	Ethanol_Degradation_II	0.319231
Mitotic_Roles_of_Polo-Like_Kinase	Cardiac__-adrenergic_Signaling	0.319236
Dopamine_Degradation	TR/RXR_Activation	0.319236
Regulation_of_Cellular_Mechanics_by_Calpain_Protease	Colorectal_Cancer_Metastasis_Signaling	0.319237
Dopamine_Degradation	Leukocyte_Extravasation_Signaling	0.319251
Assembly_of_RNA_Polymerase_II_Complex	Colorectal_Cancer_Metastasis_Signaling	0.319251
Superoxide_Radicals_Degradation	TR/RXR_Activation	0.319251
Ethanol_Degradation_IV	CD28_Signaling_in_T_Helper_Cells	0.319267
Retinoate_Biosynthesis_I	Assembly_of_RNA_Polymerase_II_Complex	0.31927
Fatty_Acid__-oxidation	Ephrin_Receptor_Signaling	0.31928
Superoxide_Radicals_Degradation	Protein_Kinase_A_Signaling	0.319291
Eicosanoid_Signaling	Ethanol_Degradation_II	0.319296
Tryptophan_Degradation_X_(Mammalian,_via_Tryptamine)	Protein_Ubiquitination_Pathway	0.319297
FXR/RXR_Activation	TR/RXR_Activation	0.319304
HIF1__Signaling	Colorectal_Cancer_Metastasis_Signaling	0.319318
Superoxide_Radicals_Degradation	Leukocyte_Extravasation_Signaling	0.319318
Noradrenaline_and_Adrenaline_Degradation	Histamine_Degradation	0.319327
Protein_Ubiquitination_Pathway	Semaphorin_Signaling_in_Neurons	0.31933
Acute_Phase_Response_Signaling	CXCR4_Signaling	0.319331
Fatty_Acid__-oxidation	Coagulation_System	0.319333
Fatty_Acid__-oxidation	VDR/RXR_Activation	0.319333
G_s_Signaling	Chondroitin_Sulfate_Biosynthesis	0.319349
Tryptophan_Degradation_X_(Mammalian,_via_Tryptamine)	Leukocyte_Extravasation_Signaling	0.319351
Glioma_Invasiveness_Signaling	G_Beta_Gamma_Signaling	0.319358
Glioma_Invasiveness_Signaling	Thrombin_Signaling	0.319358
Glioma_Invasiveness_Signaling	Leukocyte_Extravasation_Signaling	0.319371
Bladder_Cancer_Signaling	Ephrin_B_Signaling	0.31938
Bladder_Cancer_Signaling	Signaling_by_Rho_Family_GTPases	0.31938
Semaphorin_Signaling_in_Neurons	CXCR4_Signaling	0.319402
Acute_Phase_Response_Signaling	Histamine_Degradation	0.319405
Ethanol_Degradation_IV	Chemokine_Signaling	0.319412
Bladder_Cancer_Signaling	Ephrin_Receptor_Signaling	0.319423
Superoxide_Radicals_Degradation	G_Beta_Gamma_Signaling	0.319425
Superoxide_Radicals_Degradation	Thrombin_Signaling	0.319425
Superoxide_Radicals_Degradation	Granzyme_A_Signaling	0.319439
Ethanol_Degradation_IV	EIF2_Signaling	0.319439
Fatty_Acid__-oxidation	Ephrin_B_Signaling	0.319443
Fatty_Acid__-oxidation	Signaling_by_Rho_Family_GTPases	0.319443
Putrescine_Degradation_III	Ethanol_Degradation_II	0.319445
Eicosanoid_Signaling	TR/RXR_Activation	0.31947
Tryptophan_Degradation_X_(Mammalian,_via_Tryptamine)	Granzyme_A_Signaling	0.319472
Factors_Promoting_Cardiogenesis_in_Vertebrates	Ephrin_B_Signaling	0.319473
Factors_Promoting_Cardiogenesis_in_Vertebrates	Signaling_by_Rho_Family_GTPases	0.319473
Glioma_Invasiveness_Signaling	Granzyme_A_Signaling	0.319492
Regulation_of_Cellular_Mechanics_by_Calpain_Protease	CXCR4_Signaling	0.319492
Protein_Ubiquitination_Pathway	Putrescine_Degradation_III	0.319496
Factors_Promoting_Cardiogenesis_in_Vertebrates	Ephrin_Receptor_Signaling	0.319503
Acute_Phase_Response_Signaling	Ethanol_Degradation_II	0.319506
HIF1__Signaling	CXCR4_Signaling	0.319526
RAR_Activation	CD28_Signaling_in_T_Helper_Cells	0.31953
Axonal_Guidance_Signaling	HIF1__Signaling	0.319546
Fatty_Acid__-oxidation	Thyroid_Cancer_Signaling	0.319546
Fatty_Acid__-oxidation	Tight_Junction_Signaling	0.319546
Retinoate_Biosynthesis_I	Chondroitin_Sulfate_Biosynthesis_(Late_Stages)	0.319546
Semaphorin_Signaling_in_Neurons	Pancreatic_Adenocarcinoma_Signaling	0.31955
Mitotic_Roles_of_Polo-Like_Kinase	Leukocyte_Extravasation_Signaling	0.319551
Semaphorin_Signaling_in_Neurons	Estrogen-Dependent_Breast_Cancer_Signaling	0.319556
Noradrenaline_and_Adrenaline_Degradation	Ethanol_Degradation_II	0.319562
Factors_Promoting_Cardiogenesis_in_Vertebrates	Coagulation_System	0.319574
Factors_Promoting_Cardiogenesis_in_Vertebrates	VDR/RXR_Activation	0.319574
Fatty_Acid__-oxidation	Inhibition_of_Matrix_Metalloproteases	0.319574
Axonal_Guidance_Signaling	Regulation_of_Cellular_Mechanics_by_Calpain_Protease	0.319581
Protein_Ubiquitination_Pathway	Noradrenaline_and_Adrenaline_Degradation	0.319584
Noradrenaline_and_Adrenaline_Degradation	TR/RXR_Activation	0.319602
RAR_Activation	Chemokine_Signaling	0.319603
Bladder_Cancer_Signaling	Thyroid_Cancer_Signaling	0.319615
Bladder_Cancer_Signaling	Tight_Junction_Signaling	0.319615
Oxidative_Ethanol_Degradation_III	Estrogen-Dependent_Breast_Cancer_Signaling	0.31962
Protein_Ubiquitination_Pathway	FXR/RXR_Activation	0.319631
Tryptophan_Degradation_X_(Mammalian,_via_Tryptamine)	G_Beta_Gamma_Signaling	0.319633
Tryptophan_Degradation_X_(Mammalian,_via_Tryptamine)	Thrombin_Signaling	0.319633
Oxidative_Ethanol_Degradation_III	Triacylglycerol_Biosynthesis	0.31964
Oxidative_Ethanol_Degradation_III	Basal_Cell_Carcinoma_Signaling	0.31964
Oxidative_Ethanol_Degradation_III	Heparan_Sulfate_Biosynthesis	0.31964
Oxidative_Ethanol_Degradation_III	Heparan_Sulfate_Biosynthesis_(Late_Stages)	0.31964
Oxidative_Ethanol_Degradation_III	Wnt/_-catenin_Signaling	0.31964
Bladder_Cancer_Signaling	Coagulation_System	0.319641
Bladder_Cancer_Signaling	VDR/RXR_Activation	0.319641
Oxidative_Ethanol_Degradation_III	Cardiac__-adrenergic_Signaling	0.319646
Regulation_of_Cellular_Mechanics_by_Calpain_Protease	Histamine_Degradation	0.319667
Acute_Phase_Response_Signaling	TR/RXR_Activation	0.319667
Superoxide_Radicals_Degradation	Ephrin_B_Signaling	0.319687
Superoxide_Radicals_Degradation	Signaling_by_Rho_Family_GTPases	0.319687
Dopamine_Degradation	Pancreatic_Adenocarcinoma_Signaling	0.319691
Glioma_Invasiveness_Signaling	Ephrin_B_Signaling	0.319693
Glioma_Invasiveness_Signaling	Signaling_by_Rho_Family_GTPases	0.319693
Oxidative_Ethanol_Degradation_III	Regulation_of_the_Epithelial-Mesenchymal_Transition_Pathway	0.319693
Semaphorin_Signaling_in_Neurons	Triacylglycerol_Biosynthesis	0.319697
Semaphorin_Signaling_in_Neurons	Basal_Cell_Carcinoma_Signaling	0.319697
Semaphorin_Signaling_in_Neurons	Heparan_Sulfate_Biosynthesis	0.319697
Semaphorin_Signaling_in_Neurons	Heparan_Sulfate_Biosynthesis_(Late_Stages)	0.319697
Semaphorin_Signaling_in_Neurons	Wnt/_-catenin_Signaling	0.319697
HIF1__Signaling	Histamine_Degradation	0.3197
Pregnenolone_Biosynthesis	Estrogen-Dependent_Breast_Cancer_Signaling	0.319707
Fatty_Acid__-oxidation	Atherosclerosis_Signaling	0.319715
Fatty_Acid__-oxidation	Role_of_Osteoblasts,_Osteoclasts_and_Chondrocytes_in_Rheumatoid_Arthritis	0.319715
Semaphorin_Signaling_in_Neurons	Regulation_of_the_Epithelial-Mesenchymal_Transition_Pathway	0.319717
Assembly_of_RNA_Polymerase_II_Complex	Histamine_Degradation	0.31972
Protein_Ubiquitination_Pathway	Acute_Phase_Response_Signaling	0.319724
Glioma_Invasiveness_Signaling	Ephrin_Receptor_Signaling	0.319737
Mitotic_Roles_of_Polo-Like_Kinase	Regulation_of_the_Epithelial-Mesenchymal_Transition_Pathway	0.319741
Dopamine_Degradation	Triacylglycerol_Biosynthesis	0.319754
Dopamine_Degradation	Basal_Cell_Carcinoma_Signaling	0.319754
Dopamine_Degradation	Heparan_Sulfate_Biosynthesis	0.319754
Dopamine_Degradation	Heparan_Sulfate_Biosynthesis_(Late_Stages)	0.319754
Dopamine_Degradation	Wnt/_-catenin_Signaling	0.319754
Bladder_Cancer_Signaling	Inhibition_of_Matrix_Metalloproteases	0.319762
Regulation_of_Cellular_Mechanics_by_Calpain_Protease	Ethanol_Degradation_II	0.319767
Dopamine_Degradation	Estrogen-Dependent_Breast_Cancer_Signaling	0.319767
G_s_Signaling	Chondroitin_Sulfate_Biosynthesis_(Late_Stages)	0.31977
FXR/RXR_Activation	Estrogen-Dependent_Breast_Cancer_Signaling	0.319787
HIF1__Signaling	Ethanol_Degradation_II	0.319801
Axonal_Guidance_Signaling	Acute_Phase_Response_Signaling	0.319802
Dopamine_Degradation	Cardiac__-adrenergic_Signaling	0.319816
Tryptophan_Degradation_X_(Mammalian,_via_Tryptamine)	Ephrin_Receptor_Signaling	0.319817
Eicosanoid_Signaling	Estrogen-Dependent_Breast_Cancer_Signaling	0.319819
Assembly_of_RNA_Polymerase_II_Complex	Ethanol_Degradation_II	0.319821
Semaphorin_Signaling_in_Neurons	Cardiac__-adrenergic_Signaling	0.319825
Pregnenolone_Biosynthesis	Triacylglycerol_Biosynthesis	0.319828
Pregnenolone_Biosynthesis	Basal_Cell_Carcinoma_Signaling	0.319828
Pregnenolone_Biosynthesis	Heparan_Sulfate_Biosynthesis	0.319828
Pregnenolone_Biosynthesis	Heparan_Sulfate_Biosynthesis_(Late_Stages)	0.319828
Pregnenolone_Biosynthesis	Wnt/_-catenin_Signaling	0.319828
Retinoate_Biosynthesis_I	Colorectal_Cancer_Metastasis_Signaling	0.319829
Pregnenolone_Biosynthesis	Cardiac__-adrenergic_Signaling	0.319834
Oxidative_Ethanol_Degradation_III	Protein_Kinase_A_Signaling	0.319841
Putrescine_Degradation_III	Estrogen-Dependent_Breast_Cancer_Signaling	0.319848
Pregnenolone_Biosynthesis	Regulation_of_the_Epithelial-Mesenchymal_Transition_Pathway	0.319848
Axonal_Guidance_Signaling	Retinoate_Biosynthesis_I	0.319859
Tryptophan_Degradation_X_(Mammalian,_via_Tryptamine)	Ephrin_B_Signaling	0.319861
Tryptophan_Degradation_X_(Mammalian,_via_Tryptamine)	Signaling_by_Rho_Family_GTPases	0.319861
RAR_Activation	EIF2_Signaling	0.319863
Dopamine_Degradation	Regulation_of_the_Epithelial-Mesenchymal_Transition_Pathway	0.319864
Superoxide_Radicals_Degradation	Coagulation_System	0.319868
Superoxide_Radicals_Degradation	VDR/RXR_Activation	0.319868
Glioma_Invasiveness_Signaling	Coagulation_System	0.319874
Glioma_Invasiveness_Signaling	VDR/RXR_Activation	0.319874
Regulation_of_Cellular_Mechanics_by_Calpain_Protease	TR/RXR_Activation	0.319874
Pregnenolone_Biosynthesis	Pancreatic_Adenocarcinoma_Signaling	0.319881
Tryptophan_Degradation_X_(Mammalian,_via_Tryptamine)	Coagulation_System	0.319888
Tryptophan_Degradation_X_(Mammalian,_via_Tryptamine)	VDR/RXR_Activation	0.319888
Factors_Promoting_Cardiogenesis_in_Vertebrates	Inhibition_of_Matrix_Metalloproteases	0.319889
Factors_Promoting_Cardiogenesis_in_Vertebrates	Atherosclerosis_Signaling	0.319892
Factors_Promoting_Cardiogenesis_in_Vertebrates	Role_of_Osteoblasts,_Osteoclasts_and_Chondrocytes_in_Rheumatoid_Arthritis	0.319892
Superoxide_Radicals_Degradation	Ephrin_Receptor_Signaling	0.319897
FXR/RXR_Activation	Cardiac__-adrenergic_Signaling	0.319901
Mitotic_Roles_of_Polo-Like_Kinase	G_Beta_Gamma_Signaling	0.319903
Mitotic_Roles_of_Polo-Like_Kinase	Thrombin_Signaling	0.319903
Oxidative_Ethanol_Degradation_III	Intrinsic_Prothrombin_Activation_Pathway	0.319905
Putrescine_Degradation_III	Pancreatic_Adenocarcinoma_Signaling	0.319908
Mitotic_Roles_of_Polo-Like_Kinase	Granzyme_A_Signaling	0.319912
Eicosanoid_Signaling	Pancreatic_Adenocarcinoma_Signaling	0.319913
Glioma_Invasiveness_Signaling	Thyroid_Cancer_Signaling	0.319928
Glioma_Invasiveness_Signaling	Tight_Junction_Signaling	0.319928
Assembly_of_RNA_Polymerase_II_Complex	TR/RXR_Activation	0.319928
FXR/RXR_Activation	Triacylglycerol_Biosynthesis	0.319928
FXR/RXR_Activation	Basal_Cell_Carcinoma_Signaling	0.319928
FXR/RXR_Activation	Heparan_Sulfate_Biosynthesis	0.319928
FXR/RXR_Activation	Heparan_Sulfate_Biosynthesis_(Late_Stages)	0.319928
FXR/RXR_Activation	Wnt/_-catenin_Signaling	0.319928
FXR/RXR_Activation	Pancreatic_Adenocarcinoma_Signaling	0.319955
Oxidative_Ethanol_Degradation_III	Pancreatic_Adenocarcinoma_Signaling	0.319962
Chondroitin_Sulfate_Biosynthesis	Chondroitin_Sulfate_Biosynthesis_(Late_Stages)	0.319962
Eicosanoid_Signaling	Cardiac__-adrenergic_Signaling	0.319966
Tryptophan_Degradation_X_(Mammalian,_via_Tryptamine)	Thyroid_Cancer_Signaling	0.319975
Tryptophan_Degradation_X_(Mammalian,_via_Tryptamine)	Tight_Junction_Signaling	0.319975
Protein_Ubiquitination_Pathway	Assembly_of_RNA_Polymerase_II_Complex	0.319979
Noradrenaline_and_Adrenaline_Degradation	Estrogen-Dependent_Breast_Cancer_Signaling	0.319985
Eicosanoid_Signaling	Triacylglycerol_Biosynthesis	0.319993
Eicosanoid_Signaling	Basal_Cell_Carcinoma_Signaling	0.319993
Eicosanoid_Signaling	Heparan_Sulfate_Biosynthesis	0.319993
Eicosanoid_Signaling	Heparan_Sulfate_Biosynthesis_(Late_Stages)	0.319993
Eicosanoid_Signaling	Wnt/_-catenin_Signaling	0.319993
HIF1__Signaling	TR/RXR_Activation	0.320009
Mitotic_Roles_of_Polo-Like_Kinase	Protein_Kinase_A_Signaling	0.320013
Eicosanoid_Signaling	Regulation_of_the_Epithelial-Mesenchymal_Transition_Pathway	0.320013
Putrescine_Degradation_III	Triacylglycerol_Biosynthesis	0.320022
Putrescine_Degradation_III	Basal_Cell_Carcinoma_Signaling	0.320022
Putrescine_Degradation_III	Heparan_Sulfate_Biosynthesis	0.320022
Putrescine_Degradation_III	Heparan_Sulfate_Biosynthesis_(Late_Stages)	0.320022
Putrescine_Degradation_III	Wnt/_-catenin_Signaling	0.320022
Putrescine_Degradation_III	Cardiac__-adrenergic_Signaling	0.320029
Ethanol_Degradation_IV	Hepatic_Fibrosis_/_Hepatic_Stellate_Cell_Activation	0.320034
Noradrenaline_and_Adrenaline_Degradation	Pancreatic_Adenocarcinoma_Signaling	0.320045
Dopamine_Degradation	Protein_Kinase_A_Signaling	0.32005
Acute_Phase_Response_Signaling	Colorectal_Cancer_Metastasis_Signaling	0.320062
Acute_Phase_Response_Signaling	Estrogen-Dependent_Breast_Cancer_Signaling	0.320062
Pregnenolone_Biosynthesis	Protein_Kinase_A_Signaling	0.320062
Chondroitin_Sulfate_Biosynthesis	Colorectal_Cancer_Metastasis_Signaling	0.320069
Estrogen-mediated_S-phase_Entry	Bladder_Cancer_Signaling	0.320074
Glioma_Invasiveness_Signaling	Inhibition_of_Matrix_Metalloproteases	0.320076
Putrescine_Degradation_III	Regulation_of_the_Epithelial-Mesenchymal_Transition_Pathway	0.320076
FXR/RXR_Activation	Regulation_of_the_Epithelial-Mesenchymal_Transition_Pathway	0.320082
Semaphorin_Signaling_in_Neurons	Protein_Kinase_A_Signaling	0.320086
Acute_Phase_Response_Signaling	Pancreatic_Adenocarcinoma_Signaling	0.320089
Mitotic_Roles_of_Polo-Like_Kinase	Ephrin_Receptor_Signaling	0.32009
Retinoate_Biosynthesis_I	CXCR4_Signaling	0.320092
Tryptophan_Degradation_X_(Mammalian,_via_Tryptamine)	Inhibition_of_Matrix_Metalloproteases	0.320103
Intrinsic_Prothrombin_Activation_Pathway	Pregnenolone_Biosynthesis	0.320104
Intrinsic_Prothrombin_Activation_Pathway	Semaphorin_Signaling_in_Neurons	0.320108
Oxidative_Ethanol_Degradation_III	Leukocyte_Extravasation_Signaling	0.320109
Superoxide_Radicals_Degradation	Inhibition_of_Matrix_Metalloproteases	0.320123
Noradrenaline_and_Adrenaline_Degradation	Triacylglycerol_Biosynthesis	0.320126
Noradrenaline_and_Adrenaline_Degradation	Basal_Cell_Carcinoma_Signaling	0.320126
Noradrenaline_and_Adrenaline_Degradation	Heparan_Sulfate_Biosynthesis	0.320126
Noradrenaline_and_Adrenaline_Degradation	Heparan_Sulfate_Biosynthesis_(Late_Stages)	0.320126
Noradrenaline_and_Adrenaline_Degradation	Wnt/_-catenin_Signaling	0.320126
G_s_Signaling	Colorectal_Cancer_Metastasis_Signaling	0.320129
Oxidative_Ethanol_Degradation_III	G_Beta_Gamma_Signaling	0.320129
Oxidative_Ethanol_Degradation_III	Thrombin_Signaling	0.320129
FXR/RXR_Activation	Protein_Kinase_A_Signaling	0.320129
Intrinsic_Prothrombin_Activation_Pathway	FXR/RXR_Activation	0.320133
Glioma_Invasiveness_Signaling	Atherosclerosis_Signaling	0.320159
Glioma_Invasiveness_Signaling	Role_of_Osteoblasts,_Osteoclasts_and_Chondrocytes_in_Rheumatoid_Arthritis	0.320159
Noradrenaline_and_Adrenaline_Degradation	Cardiac__-adrenergic_Signaling	0.320166
Acute_Phase_Response_Signaling	Triacylglycerol_Biosynthesis	0.32017
Acute_Phase_Response_Signaling	Basal_Cell_Carcinoma_Signaling	0.32017
Acute_Phase_Response_Signaling	Heparan_Sulfate_Biosynthesis	0.32017
Acute_Phase_Response_Signaling	Heparan_Sulfate_Biosynthesis_(Late_Stages)	0.32017
Acute_Phase_Response_Signaling	Wnt/_-catenin_Signaling	0.32017
Tryptophan_Degradation_X_(Mammalian,_via_Tryptamine)	Atherosclerosis_Signaling	0.320186
Tryptophan_Degradation_X_(Mammalian,_via_Tryptamine)	Role_of_Osteoblasts,_Osteoclasts_and_Chondrocytes_in_Rheumatoid_Arthritis	0.320186
Protein_Ubiquitination_Pathway	Regulation_of_Cellular_Mechanics_by_Calpain_Protease	0.3202
Factors_Promoting_Cardiogenesis_in_Vertebrates	Thyroid_Cancer_Signaling	0.320207
Factors_Promoting_Cardiogenesis_in_Vertebrates	Tight_Junction_Signaling	0.320207
Acute_Phase_Response_Signaling	Cardiac__-adrenergic_Signaling	0.32021
Noradrenaline_and_Adrenaline_Degradation	Regulation_of_the_Epithelial-Mesenchymal_Transition_Pathway	0.320213
Ethanol_Degradation_IV	Role_of_Macrophages,_Fibroblasts_and_Endothelial_Cells_in_Rheumatoid_Arthritis	0.320216
RAR_Activation	LPS/IL-1_Mediated_Inhibition_of_RXR_Function	0.320217
Semaphorin_Signaling_in_Neurons	G_Beta_Gamma_Signaling	0.32022
Semaphorin_Signaling_in_Neurons	Thrombin_Signaling	0.32022
Putrescine_Degradation_III	Protein_Kinase_A_Signaling	0.320223
Assembly_of_RNA_Polymerase_II_Complex	CXCR4_Signaling	0.320223
Oxidative_Ethanol_Degradation_III	Granzyme_A_Signaling	0.32023
Putrescine_Degradation_III	TR/RXR_Activation	0.32023
Protein_Ubiquitination_Pathway	HIF1__Signaling	0.320235
Bladder_Cancer_Signaling	Atherosclerosis_Signaling	0.32024
Bladder_Cancer_Signaling	Role_of_Osteoblasts,_Osteoclasts_and_Chondrocytes_in_Rheumatoid_Arthritis	0.32024
Axonal_Guidance_Signaling	Chondroitin_Sulfate_Biosynthesis	0.320242
Semaphorin_Signaling_in_Neurons	Granzyme_A_Signaling	0.320254
Acute_Phase_Response_Signaling	Regulation_of_the_Epithelial-Mesenchymal_Transition_Pathway	0.320257
Pregnenolone_Biosynthesis	Leukocyte_Extravasation_Signaling	0.320263
Mitotic_Roles_of_Polo-Like_Kinase	Ephrin_B_Signaling	0.320269
Mitotic_Roles_of_Polo-Like_Kinase	Signaling_by_Rho_Family_GTPases	0.320269
Retinoate_Biosynthesis_I	Histamine_Degradation	0.320271
RAR_Activation	Hepatic_Fibrosis_/_Hepatic_Stellate_Cell_Activation	0.32029
Fatty_Acid__-oxidation	Estrogen-mediated_S-phase_Entry	0.32029
Dopamine_Degradation	G_Beta_Gamma_Signaling	0.320292
Dopamine_Degradation	Thrombin_Signaling	0.320292
Intrinsic_Prothrombin_Activation_Pathway	Putrescine_Degradation_III	0.32031
Fatty_Acid__-oxidation	CD28_Signaling_in_T_Helper_Cells	0.320315
Pregnenolone_Biosynthesis	G_Beta_Gamma_Signaling	0.320317
Pregnenolone_Biosynthesis	Thrombin_Signaling	0.320317
Regulation_of_Cellular_Mechanics_by_Calpain_Protease	Estrogen-Dependent_Breast_Cancer_Signaling	0.320324
Chondroitin_Sulfate_Biosynthesis	CXCR4_Signaling	0.320324
Ethanol_Degradation_IV	LPS/IL-1_Mediated_Inhibition_of_RXR_Function	0.320348
HIF1__Signaling	Pancreatic_Adenocarcinoma_Signaling	0.320351
HIF1__Signaling	Estrogen-Dependent_Breast_Cancer_Signaling	0.320357
FXR/RXR_Activation	Leukocyte_Extravasation_Signaling	0.320364
Retinoate_Biosynthesis_I	Ethanol_Degradation_II	0.320375
Assembly_of_RNA_Polymerase_II_Complex	Estrogen-Dependent_Breast_Cancer_Signaling	0.320378
Eicosanoid_Signaling	Protein_Kinase_A_Signaling	0.320382
Fatty_Acid__-oxidation	Chemokine_Signaling	0.320388
Mitotic_Roles_of_Polo-Like_Kinase	Coagulation_System	0.32039
Mitotic_Roles_of_Polo-Like_Kinase	VDR/RXR_Activation	0.32039
G_s_Signaling	CXCR4_Signaling	0.320391
Noradrenaline_and_Adrenaline_Degradation	Protein_Kinase_A_Signaling	0.320394
Retinoate_Biosynthesis_I	Granzyme_A_Signaling	0.320398
Glioma_Invasiveness_Signaling	Estrogen-mediated_S-phase_Entry	0.320406
Bladder_Cancer_Signaling	CD28_Signaling_in_T_Helper_Cells	0.320409
Dopamine_Degradation	Granzyme_A_Signaling	0.320416
Retinoate_Biosynthesis_I	TR/RXR_Activation	0.320416
Regulation_of_Cellular_Mechanics_by_Calpain_Protease	Pancreatic_Adenocarcinoma_Signaling	0.320418
Eicosanoid_Signaling	Leukocyte_Extravasation_Signaling	0.320429
Regulation_of_Cellular_Mechanics_by_Calpain_Protease	Triacylglycerol_Biosynthesis	0.320431
Regulation_of_Cellular_Mechanics_by_Calpain_Protease	Basal_Cell_Carcinoma_Signaling	0.320431
Regulation_of_Cellular_Mechanics_by_Calpain_Protease	Heparan_Sulfate_Biosynthesis	0.320431
Regulation_of_Cellular_Mechanics_by_Calpain_Protease	Heparan_Sulfate_Biosynthesis_(Late_Stages)	0.320431
Regulation_of_Cellular_Mechanics_by_Calpain_Protease	Wnt/_-catenin_Signaling	0.320431
Retinoate_Biosynthesis_I	Protein_Ubiquitination_Pathway	0.320437
Pregnenolone_Biosynthesis	Granzyme_A_Signaling	0.320438
RAR_Activation	Role_of_Macrophages,_Fibroblasts_and_Endothelial_Cells_in_Rheumatoid_Arthritis	0.320442
Superoxide_Radicals_Degradation	Thyroid_Cancer_Signaling	0.320445
Superoxide_Radicals_Degradation	Tight_Junction_Signaling	0.320445
FXR/RXR_Activation	G_Beta_Gamma_Signaling	0.320451
FXR/RXR_Activation	Thrombin_Signaling	0.320451
Semaphorin_Signaling_in_Neurons	Leukocyte_Extravasation_Signaling	0.320451
Factors_Promoting_Cardiogenesis_in_Vertebrates	CD28_Signaling_in_T_Helper_Cells	0.320455
Tryptophan_Degradation_X_(Mammalian,_via_Tryptamine)	Estrogen-mediated_S-phase_Entry	0.320455
Acute_Phase_Response_Signaling	Protein_Kinase_A_Signaling	0.320458
Oxidative_Ethanol_Degradation_III	Ephrin_B_Signaling	0.320465
Oxidative_Ethanol_Degradation_III	Signaling_by_Rho_Family_GTPases	0.320465
HIF1__Signaling	Triacylglycerol_Biosynthesis	0.320465
HIF1__Signaling	Basal_Cell_Carcinoma_Signaling	0.320465
HIF1__Signaling	Heparan_Sulfate_Biosynthesis	0.320465
HIF1__Signaling	Heparan_Sulfate_Biosynthesis_(Late_Stages)	0.320465
HIF1__Signaling	Wnt/_-catenin_Signaling	0.320465
Chondroitin_Sulfate_Biosynthesis_(Late_Stages)	Colorectal_Cancer_Metastasis_Signaling	0.320478
Regulation_of_Cellular_Mechanics_by_Calpain_Protease	Regulation_of_the_Epithelial-Mesenchymal_Transition_Pathway	0.320485
Assembly_of_RNA_Polymerase_II_Complex	Triacylglycerol_Biosynthesis	0.320485
Assembly_of_RNA_Polymerase_II_Complex	Basal_Cell_Carcinoma_Signaling	0.320485
Assembly_of_RNA_Polymerase_II_Complex	Heparan_Sulfate_Biosynthesis	0.320485
Assembly_of_RNA_Polymerase_II_Complex	Heparan_Sulfate_Biosynthesis_(Late_Stages)	0.320485
Assembly_of_RNA_Polymerase_II_Complex	Wnt/_-catenin_Signaling	0.320485
FXR/RXR_Activation	Granzyme_A_Signaling	0.320485
Assembly_of_RNA_Polymerase_II_Complex	Cardiac__-adrenergic_Signaling	0.320492
Superoxide_Radicals_Degradation	Atherosclerosis_Signaling	0.320494
Superoxide_Radicals_Degradation	Role_of_Osteoblasts,_Osteoclasts_and_Chondrocytes_in_Rheumatoid_Arthritis	0.320494
Chondroitin_Sulfate_Biosynthesis	Histamine_Degradation	0.320498
Intrinsic_Prothrombin_Activation_Pathway	Acute_Phase_Response_Signaling	0.320502
Putrescine_Degradation_III	G_Beta_Gamma_Signaling	0.320512
Putrescine_Degradation_III	Leukocyte_Extravasation_Signaling	0.320512
Putrescine_Degradation_III	Thrombin_Signaling	0.320512
Eicosanoid_Signaling	G_Beta_Gamma_Signaling	0.320516
Eicosanoid_Signaling	Thrombin_Signaling	0.320516
HIF1__Signaling	Regulation_of_the_Epithelial-Mesenchymal_Transition_Pathway	0.320518
Regulation_of_Cellular_Mechanics_by_Calpain_Protease	Cardiac__-adrenergic_Signaling	0.320538
Assembly_of_RNA_Polymerase_II_Complex	Regulation_of_the_Epithelial-Mesenchymal_Transition_Pathway	0.320538
Eicosanoid_Signaling	Granzyme_A_Signaling	0.32055
Semaphorin_Signaling_in_Neurons	Ephrin_B_Signaling	0.320556
Semaphorin_Signaling_in_Neurons	Signaling_by_Rho_Family_GTPases	0.320556
Assembly_of_RNA_Polymerase_II_Complex	Pancreatic_Adenocarcinoma_Signaling	0.320559
G_s_Signaling	Histamine_Degradation	0.320571
HIF1__Signaling	Cardiac__-adrenergic_Signaling	0.320572
Oxidative_Ethanol_Degradation_III	Ephrin_Receptor_Signaling	0.320575
Mitotic_Roles_of_Polo-Like_Kinase	Thyroid_Cancer_Signaling	0.320579
Mitotic_Roles_of_Polo-Like_Kinase	Tight_Junction_Signaling	0.320579
Mitotic_Roles_of_Polo-Like_Kinase	Atherosclerosis_Signaling	0.32058
Mitotic_Roles_of_Polo-Like_Kinase	Role_of_Osteoblasts,_Osteoclasts_and_Chondrocytes_in_Rheumatoid_Arthritis	0.32058
Bladder_Cancer_Signaling	Chemokine_Signaling	0.320587
Fatty_Acid__-oxidation	EIF2_Signaling	0.320593
Semaphorin_Signaling_in_Neurons	Ephrin_Receptor_Signaling	0.320599
Chondroitin_Sulfate_Biosynthesis	Ethanol_Degradation_II	0.320599
Factors_Promoting_Cardiogenesis_in_Vertebrates	Chemokine_Signaling	0.3206
G_s_Signaling	Ephrin_Receptor_Signaling	0.320615
Noradrenaline_and_Adrenaline_Degradation	Leukocyte_Extravasation_Signaling	0.320629
Putrescine_Degradation_III	Granzyme_A_Signaling	0.320632
Intrinsic_Prothrombin_Activation_Pathway	Eicosanoid_Signaling	0.320634
Dopamine_Degradation	Ephrin_B_Signaling	0.320637
Dopamine_Degradation	Signaling_by_Rho_Family_GTPases	0.320637
G_s_Signaling	TR/RXR_Activation	0.32064
Oxidative_Ethanol_Degradation_III	Coagulation_System	0.320646
Oxidative_Ethanol_Degradation_III	VDR/RXR_Activation	0.320646
Noradrenaline_and_Adrenaline_Degradation	G_Beta_Gamma_Signaling	0.320649
Noradrenaline_and_Adrenaline_Degradation	Thrombin_Signaling	0.320649
Bladder_Cancer_Signaling	EIF2_Signaling	0.320649
Pregnenolone_Biosynthesis	Ephrin_B_Signaling	0.320652
Pregnenolone_Biosynthesis	Signaling_by_Rho_Family_GTPases	0.320652
Regulation_of_Cellular_Mechanics_by_Calpain_Protease	Protein_Kinase_A_Signaling	0.320666
Acute_Phase_Response_Signaling	Leukocyte_Extravasation_Signaling	0.320673
Protein_Ubiquitination_Pathway	G_s_Signaling	0.320674
G_s_Signaling	Ethanol_Degradation_II	0.320674
Factors_Promoting_Cardiogenesis_in_Vertebrates	EIF2_Signaling	0.320696
HIF1__Signaling	Protein_Kinase_A_Signaling	0.320699
Assembly_of_RNA_Polymerase_II_Complex	Protein_Kinase_A_Signaling	0.32072
Glioma_Invasiveness_Signaling	CD28_Signaling_in_T_Helper_Cells	0.320722
Pregnenolone_Biosynthesis	Ephrin_Receptor_Signaling	0.320729
Oxidative_Ethanol_Degradation_III	Thyroid_Cancer_Signaling	0.320733
Oxidative_Ethanol_Degradation_III	Tight_Junction_Signaling	0.320733
Chondroitin_Sulfate_Biosynthesis_(Late_Stages)	CXCR4_Signaling	0.320733
Semaphorin_Signaling_in_Neurons	Coagulation_System	0.320737
Semaphorin_Signaling_in_Neurons	VDR/RXR_Activation	0.320737
Chondroitin_Sulfate_Biosynthesis	TR/RXR_Activation	0.32074
Noradrenaline_and_Adrenaline_Degradation	Granzyme_A_Signaling	0.320749
Superoxide_Radicals_Degradation	CD28_Signaling_in_T_Helper_Cells	0.320769
Dopamine_Degradation	Ephrin_Receptor_Signaling	0.320771
FXR/RXR_Activation	Ephrin_B_Signaling	0.320787
FXR/RXR_Activation	Signaling_by_Rho_Family_GTPases	0.320787
Semaphorin_Signaling_in_Neurons	Thyroid_Cancer_Signaling	0.32079
Semaphorin_Signaling_in_Neurons	Tight_Junction_Signaling	0.32079
Acute_Phase_Response_Signaling	Granzyme_A_Signaling	0.320793
Acute_Phase_Response_Signaling	G_Beta_Gamma_Signaling	0.320827
Acute_Phase_Response_Signaling	Thrombin_Signaling	0.320827
FXR/RXR_Activation	Ephrin_Receptor_Signaling	0.32083
Pregnenolone_Biosynthesis	Coagulation_System	0.320834
Pregnenolone_Biosynthesis	VDR/RXR_Activation	0.320834
Tryptophan_Degradation_X_(Mammalian,_via_Tryptamine)	CD28_Signaling_in_T_Helper_Cells	0.320836
Glioma_Invasiveness_Signaling	Chemokine_Signaling	0.320847
Putrescine_Degradation_III	Ephrin_B_Signaling	0.320847
Putrescine_Degradation_III	Signaling_by_Rho_Family_GTPases	0.320847
Eicosanoid_Signaling	Ephrin_B_Signaling	0.320852
Eicosanoid_Signaling	Signaling_by_Rho_Family_GTPases	0.320852
Retinoate_Biosynthesis_I	Pancreatic_Adenocarcinoma_Signaling	0.320872
Oxidative_Ethanol_Degradation_III	Inhibition_of_Matrix_Metalloproteases	0.320881
Protein_Ubiquitination_Pathway	Chondroitin_Sulfate_Biosynthesis	0.320882
Eicosanoid_Signaling	Ephrin_Receptor_Signaling	0.320895
Axonal_Guidance_Signaling	Chondroitin_Sulfate_Biosynthesis_(Late_Stages)	0.320896
Putrescine_Degradation_III	Ephrin_Receptor_Signaling	0.320904
Chondroitin_Sulfate_Biosynthesis_(Late_Stages)	Histamine_Degradation	0.320907
CXCR4_Signaling	Colorectal_Cancer_Metastasis_Signaling	0.320907
Dopamine_Degradation	Thyroid_Cancer_Signaling	0.320913
Dopamine_Degradation	Tight_Junction_Signaling	0.320913
Tryptophan_Degradation_X_(Mammalian,_via_Tryptamine)	Chemokine_Signaling	0.320914
FXR/RXR_Activation	Coagulation_System	0.320914
FXR/RXR_Activation	VDR/RXR_Activation	0.320914
Human_Embryonic_Stem_Cell_Pluripotency	Granulocyte_Adhesion_and_Diapedesis	0.320922
Semaphorin_Signaling_in_Neurons	Inhibition_of_Matrix_Metalloproteases	0.320938
Retinoate_Biosynthesis_I	Estrogen-Dependent_Breast_Cancer_Signaling	0.320947
Assembly_of_RNA_Polymerase_II_Complex	Leukocyte_Extravasation_Signaling	0.320954
Pregnenolone_Biosynthesis	Thyroid_Cancer_Signaling	0.320954
Pregnenolone_Biosynthesis	Tight_Junction_Signaling	0.320954
Glioma_Invasiveness_Signaling	EIF2_Signaling	0.320971
Noradrenaline_and_Adrenaline_Degradation	Ephrin_B_Signaling	0.320984
Noradrenaline_and_Adrenaline_Degradation	Signaling_by_Rho_Family_GTPases	0.320984
Regulation_of_Cellular_Mechanics_by_Calpain_Protease	G_Beta_Gamma_Signaling	0.320988
Regulation_of_Cellular_Mechanics_by_Calpain_Protease	Thrombin_Signaling	0.320988
Retinoate_Biosynthesis_I	Triacylglycerol_Biosynthesis	0.320989
Retinoate_Biosynthesis_I	Basal_Cell_Carcinoma_Signaling	0.320989
Retinoate_Biosynthesis_I	Heparan_Sulfate_Biosynthesis	0.320989
Retinoate_Biosynthesis_I	Heparan_Sulfate_Biosynthesis_(Late_Stages)	0.320989
Retinoate_Biosynthesis_I	Wnt/_-catenin_Signaling	0.320989
Fatty_Acid__-oxidation	Hepatic_Fibrosis_/_Hepatic_Stellate_Cell_Activation	0.320994
Retinoate_Biosynthesis_I	Cardiac__-adrenergic_Signaling	0.320996
Oxidative_Ethanol_Degradation_III	Atherosclerosis_Signaling	0.320997
Oxidative_Ethanol_Degradation_III	Role_of_Osteoblasts,_Osteoclasts_and_Chondrocytes_in_Rheumatoid_Arthritis	0.320997
Regulation_of_Cellular_Mechanics_by_Calpain_Protease	Leukocyte_Extravasation_Signaling	0.321001
Chondroitin_Sulfate_Biosynthesis_(Late_Stages)	Ethanol_Degradation_II	0.321008
Intrinsic_Prothrombin_Activation_Pathway	Regulation_of_Cellular_Mechanics_by_Calpain_Protease	0.321013
Superoxide_Radicals_Degradation	Chemokine_Signaling	0.321015
Superoxide_Radicals_Degradation	EIF2_Signaling	0.321019
FXR/RXR_Activation	Thyroid_Cancer_Signaling	0.321021
FXR/RXR_Activation	Tight_Junction_Signaling	0.321021
HIF1__Signaling	G_Beta_Gamma_Signaling	0.321021
HIF1__Signaling	Thrombin_Signaling	0.321021
Semaphorin_Signaling_in_Neurons	Atherosclerosis_Signaling	0.321021
Semaphorin_Signaling_in_Neurons	Role_of_Osteoblasts,_Osteoclasts_and_Chondrocytes_in_Rheumatoid_Arthritis	0.321021
Acute_Phase_Response_Signaling	Ephrin_B_Signaling	0.321028
Acute_Phase_Response_Signaling	Signaling_by_Rho_Family_GTPases	0.321028
Putrescine_Degradation_III	Coagulation_System	0.321028
Putrescine_Degradation_III	VDR/RXR_Activation	0.321028
Noradrenaline_and_Adrenaline_Degradation	Ephrin_Receptor_Signaling	0.321041
Assembly_of_RNA_Polymerase_II_Complex	G_Beta_Gamma_Signaling	0.321041
Assembly_of_RNA_Polymerase_II_Complex	Thrombin_Signaling	0.321041
Retinoate_Biosynthesis_I	Regulation_of_the_Epithelial-Mesenchymal_Transition_Pathway	0.321044
Intrinsic_Prothrombin_Activation_Pathway	HIF1__Signaling	0.321049
HIF1__Signaling	Granzyme_A_Signaling	0.321055
HIF1__Signaling	Leukocyte_Extravasation_Signaling	0.321068
Pregnenolone_Biosynthesis	Inhibition_of_Matrix_Metalloproteases	0.321068
Intrinsic_Prothrombin_Activation_Pathway	Assembly_of_RNA_Polymerase_II_Complex	0.32107
Axonal_Guidance_Signaling	Colorectal_Cancer_Metastasis_Signaling	0.32108
Eicosanoid_Signaling	Thyroid_Cancer_Signaling	0.321087
Eicosanoid_Signaling	Tight_Junction_Signaling	0.321087
Eicosanoid_Signaling	Coagulation_System	0.321089
Eicosanoid_Signaling	VDR/RXR_Activation	0.321089
G_s_Signaling	Pancreatic_Adenocarcinoma_Signaling	0.321095
Putrescine_Degradation_III	Thyroid_Cancer_Signaling	0.321115
Putrescine_Degradation_III	Tight_Junction_Signaling	0.321115
Chondroitin_Sulfate_Biosynthesis_(Late_Stages)	TR/RXR_Activation	0.321115
Dopamine_Degradation	Atherosclerosis_Signaling	0.321116
Dopamine_Degradation	Role_of_Osteoblasts,_Osteoclasts_and_Chondrocytes_in_Rheumatoid_Arthritis	0.321116
Regulation_of_Cellular_Mechanics_by_Calpain_Protease	Granzyme_A_Signaling	0.321122
Oxidative_Ethanol_Degradation_III	Estrogen-mediated_S-phase_Entry	0.321123
Acute_Phase_Response_Signaling	Ephrin_Receptor_Signaling	0.321138
Bladder_Cancer_Signaling	Hepatic_Fibrosis_/_Hepatic_Stellate_Cell_Activation	0.321156
Chondroitin_Sulfate_Biosynthesis	Estrogen-Dependent_Breast_Cancer_Signaling	0.321156
G_s_Signaling	Triacylglycerol_Biosynthesis	0.321157
G_s_Signaling	Basal_Cell_Carcinoma_Signaling	0.321157
G_s_Signaling	Heparan_Sulfate_Biosynthesis	0.321157
G_s_Signaling	Heparan_Sulfate_Biosynthesis_(Late_Stages)	0.321157
G_s_Signaling	Wnt/_-catenin_Signaling	0.321157
Dopamine_Degradation	Inhibition_of_Matrix_Metalloproteases	0.321161
FXR/RXR_Activation	Inhibition_of_Matrix_Metalloproteases	0.321169
Retinoate_Biosynthesis_I	Protein_Kinase_A_Signaling	0.321175
Dopamine_Degradation	Coagulation_System	0.321182
Dopamine_Degradation	VDR/RXR_Activation	0.321182
Colorectal_Cancer_Metastasis_Signaling	Histamine_Degradation	0.321182
Pregnenolone_Biosynthesis	Atherosclerosis_Signaling	0.321185
Pregnenolone_Biosynthesis	Role_of_Osteoblasts,_Osteoclasts_and_Chondrocytes_in_Rheumatoid_Arthritis	0.321185
Acute_Phase_Response_Signaling	Coagulation_System	0.321209
Acute_Phase_Response_Signaling	VDR/RXR_Activation	0.321209
Tryptophan_Degradation_X_(Mammalian,_via_Tryptamine)	EIF2_Signaling	0.321213
G_s_Signaling	Cardiac__-adrenergic_Signaling	0.32122
Noradrenaline_and_Adrenaline_Degradation	Thyroid_Cancer_Signaling	0.321232
Noradrenaline_and_Adrenaline_Degradation	Tight_Junction_Signaling	0.321232
Mitotic_Roles_of_Polo-Like_Kinase	CD28_Signaling_in_T_Helper_Cells	0.321233
Eicosanoid_Signaling	Inhibition_of_Matrix_Metalloproteases	0.321234
LPS/IL-1_Mediated_Inhibition_of_RXR_Function	Factors_Promoting_Cardiogenesis_in_Vertebrates	0.321237
G_s_Signaling	Estrogen-Dependent_Breast_Cancer_Signaling	0.321247
Chondroitin_Sulfate_Biosynthesis	Pancreatic_Adenocarcinoma_Signaling	0.321249
Fatty_Acid__-oxidation	Role_of_Macrophages,_Fibroblasts_and_Endothelial_Cells_in_Rheumatoid_Arthritis	0.321251
Factors_Promoting_Cardiogenesis_in_Vertebrates	Hepatic_Fibrosis_/_Hepatic_Stellate_Cell_Activation	0.321254
Fatty_Acid__-oxidation	LPS/IL-1_Mediated_Inhibition_of_RXR_Function	0.321255
Putrescine_Degradation_III	Inhibition_of_Matrix_Metalloproteases	0.321263
Assembly_of_RNA_Polymerase_II_Complex	Granzyme_A_Signaling	0.321263
G_s_Signaling	Regulation_of_the_Epithelial-Mesenchymal_Transition_Pathway	0.321268
Colorectal_Cancer_Metastasis_Signaling	Ethanol_Degradation_II	0.321283
TR/RXR_Activation	Colorectal_Cancer_Metastasis_Signaling	0.32129
Acute_Phase_Response_Signaling	Thyroid_Cancer_Signaling	0.321296
Acute_Phase_Response_Signaling	Tight_Junction_Signaling	0.321296
Chondroitin_Sulfate_Biosynthesis	Triacylglycerol_Biosynthesis	0.321296
Chondroitin_Sulfate_Biosynthesis	Basal_Cell_Carcinoma_Signaling	0.321296
Chondroitin_Sulfate_Biosynthesis	Heparan_Sulfate_Biosynthesis	0.321296
Chondroitin_Sulfate_Biosynthesis	Heparan_Sulfate_Biosynthesis_(Late_Stages)	0.321296
Chondroitin_Sulfate_Biosynthesis	Wnt/_-catenin_Signaling	0.321296
Chondroitin_Sulfate_Biosynthesis	Cardiac__-adrenergic_Signaling	0.321303
CXCR4_Signaling	Histamine_Degradation	0.321303
Chondroitin_Sulfate_Biosynthesis	Regulation_of_the_Epithelial-Mesenchymal_Transition_Pathway	0.321316
Eicosanoid_Signaling	Atherosclerosis_Signaling	0.321317
Eicosanoid_Signaling	Role_of_Osteoblasts,_Osteoclasts_and_Chondrocytes_in_Rheumatoid_Arthritis	0.321317
Estrogen-mediated_S-phase_Entry	Semaphorin_Signaling_in_Neurons	0.321319
Regulation_of_Cellular_Mechanics_by_Calpain_Protease	Ephrin_B_Signaling	0.321323
Regulation_of_Cellular_Mechanics_by_Calpain_Protease	Signaling_by_Rho_Family_GTPases	0.321323
Assembly_of_RNA_Polymerase_II_Complex	Ephrin_B_Signaling	0.321323
Assembly_of_RNA_Polymerase_II_Complex	Signaling_by_Rho_Family_GTPases	0.321323
Mitotic_Roles_of_Polo-Like_Kinase	Estrogen-mediated_S-phase_Entry	0.321324
HIF1__Signaling	Ephrin_B_Signaling	0.321357
HIF1__Signaling	Signaling_by_Rho_Family_GTPases	0.321357
Regulation_of_Cellular_Mechanics_by_Calpain_Protease	Ephrin_Receptor_Signaling	0.321366
Mitotic_Roles_of_Polo-Like_Kinase	EIF2_Signaling	0.321367
Putrescine_Degradation_III	Atherosclerosis_Signaling	0.32138
Putrescine_Degradation_III	Role_of_Osteoblasts,_Osteoclasts_and_Chondrocytes_in_Rheumatoid_Arthritis	0.32138
Dopamine_Degradation	Estrogen-mediated_S-phase_Entry	0.32138
Axonal_Guidance_Signaling	Histamine_Degradation	0.321393
HIF1__Signaling	Ephrin_Receptor_Signaling	0.3214
CXCR4_Signaling	Ethanol_Degradation_II	0.321404
Acute_Phase_Response_Signaling	Inhibition_of_Matrix_Metalloproteases	0.321424
Noradrenaline_and_Adrenaline_Degradation	Inhibition_of_Matrix_Metalloproteases	0.321433
G_s_Signaling	Protein_Kinase_A_Signaling	0.321454
Axonal_Guidance_Signaling	G_s_Signaling	0.321464
Glioma_Invasiveness_Signaling	Hepatic_Fibrosis_/_Hepatic_Stellate_Cell_Activation	0.321469
Retinoate_Biosynthesis_I	G_Beta_Gamma_Signaling	0.321472
Retinoate_Biosynthesis_I	Leukocyte_Extravasation_Signaling	0.321472
Retinoate_Biosynthesis_I	Thrombin_Signaling	0.321472
Factors_Promoting_Cardiogenesis_in_Vertebrates	Role_of_Macrophages,_Fibroblasts_and_Endothelial_Cells_in_Rheumatoid_Arthritis	0.321473
Intrinsic_Prothrombin_Activation_Pathway	G_s_Signaling	0.321476
Chondroitin_Sulfate_Biosynthesis	Protein_Kinase_A_Signaling	0.321498
Axonal_Guidance_Signaling	Ethanol_Degradation_II	0.3215
Tryptophan_Degradation_X_(Mammalian,_via_Tryptamine)	Hepatic_Fibrosis_/_Hepatic_Stellate_Cell_Activation	0.321502
Regulation_of_Cellular_Mechanics_by_Calpain_Protease	Coagulation_System	0.321504
Regulation_of_Cellular_Mechanics_by_Calpain_Protease	VDR/RXR_Activation	0.321504
Noradrenaline_and_Adrenaline_Degradation	Coagulation_System	0.321509
Noradrenaline_and_Adrenaline_Degradation	VDR/RXR_Activation	0.321509
FXR/RXR_Activation	Atherosclerosis_Signaling	0.321514
FXR/RXR_Activation	Role_of_Osteoblasts,_Osteoclasts_and_Chondrocytes_in_Rheumatoid_Arthritis	0.321514
Superoxide_Radicals_Degradation	Hepatic_Fibrosis_/_Hepatic_Stellate_Cell_Activation	0.321516
Assembly_of_RNA_Polymerase_II_Complex	Ephrin_Receptor_Signaling	0.321521
Estrogen-mediated_S-phase_Entry	Pregnenolone_Biosynthesis	0.321521
Bladder_Cancer_Signaling	Role_of_Macrophages,_Fibroblasts_and_Endothelial_Cells_in_Rheumatoid_Arthritis	0.321529
Protein_Ubiquitination_Pathway	Colorectal_Cancer_Metastasis_Signaling	0.321535
HIF1__Signaling	Coagulation_System	0.321538
HIF1__Signaling	VDR/RXR_Activation	0.321538
Oxidative_Ethanol_Degradation_III	CD28_Signaling_in_T_Helper_Cells	0.321541
CXCR4_Signaling	TR/RXR_Activation	0.321545
Protein_Ubiquitination_Pathway	Chondroitin_Sulfate_Biosynthesis_(Late_Stages)	0.321549
Regulation_of_Cellular_Mechanics_by_Calpain_Protease	Thyroid_Cancer_Signaling	0.321558
Regulation_of_Cellular_Mechanics_by_Calpain_Protease	Tight_Junction_Signaling	0.321558
Assembly_of_RNA_Polymerase_II_Complex	Coagulation_System	0.321558
Assembly_of_RNA_Polymerase_II_Complex	VDR/RXR_Activation	0.321558
Glioma_Invasiveness_Signaling	LPS/IL-1_Mediated_Inhibition_of_RXR_Function	0.321563
Estrogen-mediated_S-phase_Entry	FXR/RXR_Activation	0.321564
Chondroitin_Sulfate_Biosynthesis_(Late_Stages)	Estrogen-Dependent_Breast_Cancer_Signaling	0.321565
Tryptophan_Degradation_X_(Mammalian,_via_Tryptamine)	LPS/IL-1_Mediated_Inhibition_of_RXR_Function	0.32157
Acute_Phase_Response_Signaling	Atherosclerosis_Signaling	0.321581
Acute_Phase_Response_Signaling	Role_of_Osteoblasts,_Osteoclasts_and_Chondrocytes_in_Rheumatoid_Arthritis	0.321581
Semaphorin_Signaling_in_Neurons	CD28_Signaling_in_T_Helper_Cells	0.321585
HIF1__Signaling	Thyroid_Cancer_Signaling	0.321591
HIF1__Signaling	Tight_Junction_Signaling	0.321591
Noradrenaline_and_Adrenaline_Degradation	Atherosclerosis_Signaling	0.321596
Noradrenaline_and_Adrenaline_Degradation	Role_of_Osteoblasts,_Osteoclasts_and_Chondrocytes_in_Rheumatoid_Arthritis	0.321596
Axonal_Guidance_Signaling	G_Beta_Gamma_Signaling	0.321624
Axonal_Guidance_Signaling	Thrombin_Signaling	0.321624
Estrogen-mediated_S-phase_Entry	Eicosanoid_Signaling	0.321633
Assembly_of_RNA_Polymerase_II_Complex	Thyroid_Cancer_Signaling	0.321645
Assembly_of_RNA_Polymerase_II_Complex	Tight_Junction_Signaling	0.321645
Axonal_Guidance_Signaling	TR/RXR_Activation	0.321649
Oxidative_Ethanol_Degradation_III	Chemokine_Signaling	0.321652
Chondroitin_Sulfate_Biosynthesis_(Late_Stages)	Pancreatic_Adenocarcinoma_Signaling	0.321659
Estrogen-mediated_S-phase_Entry	Putrescine_Degradation_III	0.321663
Chondroitin_Sulfate_Biosynthesis_(Late_Stages)	Triacylglycerol_Biosynthesis	0.321672
Chondroitin_Sulfate_Biosynthesis_(Late_Stages)	Basal_Cell_Carcinoma_Signaling	0.321672
Chondroitin_Sulfate_Biosynthesis_(Late_Stages)	Heparan_Sulfate_Biosynthesis	0.321672
Chondroitin_Sulfate_Biosynthesis_(Late_Stages)	Heparan_Sulfate_Biosynthesis_(Late_Stages)	0.321672
Chondroitin_Sulfate_Biosynthesis_(Late_Stages)	Wnt/_-catenin_Signaling	0.321672
Chondroitin_Sulfate_Biosynthesis_(Late_Stages)	Cardiac__-adrenergic_Signaling	0.321679
Ethanol_Degradation_II	Histamine_Degradation	0.321679
Glioma_Invasiveness_Signaling	Role_of_Macrophages,_Fibroblasts_and_Endothelial_Cells_in_Rheumatoid_Arthritis	0.321693
Dopamine_Degradation	CD28_Signaling_in_T_Helper_Cells	0.321696
TR/RXR_Activation	Histamine_Degradation	0.321699
Regulation_of_Cellular_Mechanics_by_Calpain_Protease	Inhibition_of_Matrix_Metalloproteases	0.321705
Chondroitin_Sulfate_Biosynthesis_(Late_Stages)	Regulation_of_the_Epithelial-Mesenchymal_Transition_Pathway	0.321726
Estrogen-mediated_S-phase_Entry	Noradrenaline_and_Adrenaline_Degradation	0.32173
HIF1__Signaling	Inhibition_of_Matrix_Metalloproteases	0.321739
G_s_Signaling	Leukocyte_Extravasation_Signaling	0.321744
Mitotic_Roles_of_Polo-Like_Kinase	Chemokine_Signaling	0.321756
Assembly_of_RNA_Polymerase_II_Complex	Inhibition_of_Matrix_Metalloproteases	0.321759
Chondroitin_Sulfate_Biosynthesis	G_Beta_Gamma_Signaling	0.321766
Chondroitin_Sulfate_Biosynthesis	Thrombin_Signaling	0.321766
Colorectal_Cancer_Metastasis_Signaling	Pancreatic_Adenocarcinoma_Signaling	0.321766
Protein_Ubiquitination_Pathway	CXCR4_Signaling	0.32177
Regulation_of_Cellular_Mechanics_by_Calpain_Protease	Atherosclerosis_Signaling	0.321789
Regulation_of_Cellular_Mechanics_by_Calpain_Protease	Role_of_Osteoblasts,_Osteoclasts_and_Chondrocytes_in_Rheumatoid_Arthritis	0.321789
Tryptophan_Degradation_X_(Mammalian,_via_Tryptamine)	Role_of_Macrophages,_Fibroblasts_and_Endothelial_Cells_in_Rheumatoid_Arthritis	0.321796
Intrinsic_Prothrombin_Activation_Pathway	Chondroitin_Sulfate_Biosynthesis	0.321802
Pregnenolone_Biosynthesis	CD28_Signaling_in_T_Helper_Cells	0.321802
Mitotic_Roles_of_Polo-Like_Kinase	LPS/IL-1_Mediated_Inhibition_of_RXR_Function	0.321809
Mitotic_Roles_of_Polo-Like_Kinase	Inhibition_of_Matrix_Metalloproteases	0.321812
Oxidative_Ethanol_Degradation_III	EIF2_Signaling	0.321813
FXR/RXR_Activation	CD28_Signaling_in_T_Helper_Cells	0.321816
Retinoate_Biosynthesis_I	Ephrin_B_Signaling	0.321817
Retinoate_Biosynthesis_I	Signaling_by_Rho_Family_GTPases	0.321817
Semaphorin_Signaling_in_Neurons	Chemokine_Signaling	0.321819
HIF1__Signaling	Atherosclerosis_Signaling	0.321822
HIF1__Signaling	Role_of_Osteoblasts,_Osteoclasts_and_Chondrocytes_in_Rheumatoid_Arthritis	0.321822
Colorectal_Cancer_Metastasis_Signaling	Estrogen-Dependent_Breast_Cancer_Signaling	0.32184
Assembly_of_RNA_Polymerase_II_Complex	Atherosclerosis_Signaling	0.321842
Assembly_of_RNA_Polymerase_II_Complex	Role_of_Osteoblasts,_Osteoclasts_and_Chondrocytes_in_Rheumatoid_Arthritis	0.321842
Colorectal_Cancer_Metastasis_Signaling	Triacylglycerol_Biosynthesis	0.321846
Colorectal_Cancer_Metastasis_Signaling	Basal_Cell_Carcinoma_Signaling	0.321846
Colorectal_Cancer_Metastasis_Signaling	Heparan_Sulfate_Biosynthesis	0.321846
Colorectal_Cancer_Metastasis_Signaling	Heparan_Sulfate_Biosynthesis_(Late_Stages)	0.321846
Colorectal_Cancer_Metastasis_Signaling	Wnt/_-catenin_Signaling	0.321846
TR/RXR_Activation	Ethanol_Degradation_II	0.321853
Acute_Phase_Response_Signaling	Estrogen-mediated_S-phase_Entry	0.321855
Semaphorin_Signaling_in_Neurons	EIF2_Signaling	0.321858
Pregnenolone_Biosynthesis	Chemokine_Signaling	0.32186
Chondroitin_Sulfate_Biosynthesis	Leukocyte_Extravasation_Signaling	0.321866
G_s_Signaling	Granzyme_A_Signaling	0.321868
Axonal_Guidance_Signaling	CXCR4_Signaling	0.321869
Dopamine_Degradation	Chemokine_Signaling	0.321879
Chondroitin_Sulfate_Biosynthesis	Granzyme_A_Signaling	0.321887
Colorectal_Cancer_Metastasis_Signaling	Cardiac__-adrenergic_Signaling	0.321887
Axonal_Guidance_Signaling	Protein_Ubiquitination_Pathway	0.321889
Dopamine_Degradation	EIF2_Signaling	0.321893
Chondroitin_Sulfate_Biosynthesis_(Late_Stages)	Protein_Kinase_A_Signaling	0.321907
Putrescine_Degradation_III	CD28_Signaling_in_T_Helper_Cells	0.32191
Ethanol_Degradation_IV	Granulocyte_Adhesion_and_Diapedesis	0.321925
G_s_Signaling	G_Beta_Gamma_Signaling	0.32193
G_s_Signaling	Thrombin_Signaling	0.32193
Colorectal_Cancer_Metastasis_Signaling	Regulation_of_the_Epithelial-Mesenchymal_Transition_Pathway	0.321934
FXR/RXR_Activation	Chemokine_Signaling	0.32194
Retinoate_Biosynthesis_I	Ephrin_Receptor_Signaling	0.321951
CXCR4_Signaling	Estrogen-Dependent_Breast_Cancer_Signaling	0.32196
LXR/RXR_Activation	Role_of_Macrophages,_Fibroblasts_and_Endothelial_Cells_in_Rheumatoid_Arthritis	0.321968
LXR/RXR_Activation	Agranulocyte_Adhesion_and_Diapedesis	0.321968
LXR/RXR_Activation	Cell_Cycle_Regulation_by_BTG_Family_Proteins	0.321968
LXR/RXR_Activation	Chemokine_Signaling	0.321968
LXR/RXR_Activation	Dendritic_Cell_Maturation	0.321968
LXR/RXR_Activation	Thrombopoietin_Signaling	0.321968
CXCR4_Signaling	Pancreatic_Adenocarcinoma_Signaling	0.322021
Putrescine_Degradation_III	Chemokine_Signaling	0.322034
Axonal_Guidance_Signaling	Pancreatic_Adenocarcinoma_Signaling	0.32204
G_s_Signaling	Ephrin_B_Signaling	0.322041
G_s_Signaling	Signaling_by_Rho_Family_GTPases	0.322041
Protein_Ubiquitination_Pathway	Ethanol_Degradation_II	0.322061
Acute_Phase_Response_Signaling	CD28_Signaling_in_T_Helper_Cells	0.322071
Superoxide_Radicals_Degradation	Role_of_Macrophages,_Fibroblasts_and_Endothelial_Cells_in_Rheumatoid_Arthritis	0.322079
Colorectal_Cancer_Metastasis_Signaling	Protein_Kinase_A_Signaling	0.322081
Axonal_Guidance_Signaling	Estrogen-Dependent_Breast_Cancer_Signaling	0.322089
Retinoate_Biosynthesis_I	Thyroid_Cancer_Signaling	0.322093
Retinoate_Biosynthesis_I	Tight_Junction_Signaling	0.322093
FXR/RXR_Activation	EIF2_Signaling	0.322096
CXCR4_Signaling	Triacylglycerol_Biosynthesis	0.322101
CXCR4_Signaling	Basal_Cell_Carcinoma_Signaling	0.322101
CXCR4_Signaling	Heparan_Sulfate_Biosynthesis	0.322101
CXCR4_Signaling	Heparan_Sulfate_Biosynthesis_(Late_Stages)	0.322101
CXCR4_Signaling	Wnt/_-catenin_Signaling	0.322101
Eicosanoid_Signaling	Chemokine_Signaling	0.322116
Chondroitin_Sulfate_Biosynthesis	Ephrin_B_Signaling	0.322121
Chondroitin_Sulfate_Biosynthesis	Signaling_by_Rho_Family_GTPases	0.322121
Protein_Ubiquitination_Pathway	TR/RXR_Activation	0.322132
Regulation_of_Cellular_Mechanics_by_Calpain_Protease	Estrogen-mediated_S-phase_Entry	0.322132
CXCR4_Signaling	Cardiac__-adrenergic_Signaling	0.322141
Intrinsic_Prothrombin_Activation_Pathway	Noradrenaline_and_Adrenaline_Degradation	0.322157
Noradrenaline_and_Adrenaline_Degradation	CD28_Signaling_in_T_Helper_Cells	0.32216
Dopamine_Degradation	Intrinsic_Prothrombin_Activation_Pathway	0.322163
Axonal_Guidance_Signaling	Cardiac__-adrenergic_Signaling	0.322167
Estrogen-mediated_S-phase_Entry	HIF1__Signaling	0.322167
Protein_Ubiquitination_Pathway	Ephrin_B_Signaling	0.322169
Protein_Ubiquitination_Pathway	Signaling_by_Rho_Family_GTPases	0.322169
CXCR4_Signaling	Regulation_of_the_Epithelial-Mesenchymal_Transition_Pathway	0.322188
Noradrenaline_and_Adrenaline_Degradation	Chemokine_Signaling	0.322191
Putrescine_Degradation_III	EIF2_Signaling	0.322193
Histamine_Degradation	Pancreatic_Adenocarcinoma_Signaling	0.322195
Chondroitin_Sulfate_Biosynthesis	Ephrin_Receptor_Signaling	0.322198
Pregnenolone_Biosynthesis	EIF2_Signaling	0.32222
G_s_Signaling	Coagulation_System	0.322227
G_s_Signaling	VDR/RXR_Activation	0.322227
Chondroitin_Sulfate_Biosynthesis_(Late_Stages)	G_Beta_Gamma_Signaling	0.322229
Chondroitin_Sulfate_Biosynthesis_(Late_Stages)	Thrombin_Signaling	0.322229
Histamine_Degradation	Estrogen-Dependent_Breast_Cancer_Signaling	0.322235
Axonal_Guidance_Signaling	Triacylglycerol_Biosynthesis	0.322238
Axonal_Guidance_Signaling	Basal_Cell_Carcinoma_Signaling	0.322238
Axonal_Guidance_Signaling	Heparan_Sulfate_Biosynthesis	0.322238
Axonal_Guidance_Signaling	Heparan_Sulfate_Biosynthesis_(Late_Stages)	0.322238
Axonal_Guidance_Signaling	Wnt/_-catenin_Signaling	0.322238
Chondroitin_Sulfate_Biosynthesis_(Late_Stages)	Leukocyte_Extravasation_Signaling	0.322242
Acute_Phase_Response_Signaling	Chemokine_Signaling	0.322249
Retinoate_Biosynthesis_I	Coagulation_System	0.322252
Retinoate_Biosynthesis_I	VDR/RXR_Activation	0.322252
Chondroitin_Sulfate_Biosynthesis_(Late_Stages)	Granzyme_A_Signaling	0.322262
Oxidative_Ethanol_Degradation_III	Hepatic_Fibrosis_/_Hepatic_Stellate_Cell_Activation	0.322274
Axonal_Guidance_Signaling	Intrinsic_Prothrombin_Activation_Pathway	0.322274
Histamine_Degradation	Triacylglycerol_Biosynthesis	0.322276
Histamine_Degradation	Basal_Cell_Carcinoma_Signaling	0.322276
Histamine_Degradation	Heparan_Sulfate_Biosynthesis	0.322276
Histamine_Degradation	Heparan_Sulfate_Biosynthesis_(Late_Stages)	0.322276
Histamine_Degradation	Wnt/_-catenin_Signaling	0.322276
Intrinsic_Prothrombin_Activation_Pathway	Colorectal_Cancer_Metastasis_Signaling	0.322278
Ethanol_Degradation_II	Pancreatic_Adenocarcinoma_Signaling	0.322296
Retinoate_Biosynthesis_I	Atherosclerosis_Signaling	0.322296
Retinoate_Biosynthesis_I	Role_of_Osteoblasts,_Osteoclasts_and_Chondrocytes_in_Rheumatoid_Arthritis	0.322296
Histamine_Degradation	Cardiac__-adrenergic_Signaling	0.322316
Retinoate_Biosynthesis_I	Inhibition_of_Matrix_Metalloproteases	0.322321
RAR_Activation	Granulocyte_Adhesion_and_Diapedesis	0.322322
Acute_Phase_Response_Signaling	EIF2_Signaling	0.322324
Intrinsic_Prothrombin_Activation_Pathway	Chondroitin_Sulfate_Biosynthesis_(Late_Stages)	0.322328
Semaphorin_Signaling_in_Neurons	Hepatic_Fibrosis_/_Hepatic_Stellate_Cell_Activation	0.322331
Chondroitin_Sulfate_Biosynthesis	Coagulation_System	0.322336
Chondroitin_Sulfate_Biosynthesis	VDR/RXR_Activation	0.322336
Ethanol_Degradation_II	Estrogen-Dependent_Breast_Cancer_Signaling	0.322336
Colorectal_Cancer_Metastasis_Signaling	Leukocyte_Extravasation_Signaling	0.322349
Regulation_of_Cellular_Mechanics_by_Calpain_Protease	CD28_Signaling_in_T_Helper_Cells	0.322352
TR/RXR_Activation	Estrogen-Dependent_Breast_Cancer_Signaling	0.322356
Histamine_Degradation	Regulation_of_the_Epithelial-Mesenchymal_Transition_Pathway	0.322363
Estrogen-mediated_S-phase_Entry	Assembly_of_RNA_Polymerase_II_Complex	0.322366
CXCR4_Signaling	Protein_Kinase_A_Signaling	0.322369
Assembly_of_RNA_Polymerase_II_Complex	CD28_Signaling_in_T_Helper_Cells	0.322372
Ethanol_Degradation_II	Triacylglycerol_Biosynthesis	0.322376
Ethanol_Degradation_II	Basal_Cell_Carcinoma_Signaling	0.322376
Ethanol_Degradation_II	Heparan_Sulfate_Biosynthesis	0.322376
Ethanol_Degradation_II	Heparan_Sulfate_Biosynthesis_(Late_Stages)	0.322376
Ethanol_Degradation_II	Wnt/_-catenin_Signaling	0.322376
HIF1__Signaling	CD28_Signaling_in_T_Helper_Cells	0.322386
Chondroitin_Sulfate_Biosynthesis	Thyroid_Cancer_Signaling	0.32239
Chondroitin_Sulfate_Biosynthesis	Tight_Junction_Signaling	0.32239
TR/RXR_Activation	Pancreatic_Adenocarcinoma_Signaling	0.322403
Colorectal_Cancer_Metastasis_Signaling	G_Beta_Gamma_Signaling	0.322403
Colorectal_Cancer_Metastasis_Signaling	Thrombin_Signaling	0.322403
Eicosanoid_Signaling	CD28_Signaling_in_T_Helper_Cells	0.322413
Ethanol_Degradation_II	Cardiac__-adrenergic_Signaling	0.322416
G_s_Signaling	Inhibition_of_Matrix_Metalloproteases	0.322434
Pregnenolone_Biosynthesis	Hepatic_Fibrosis_/_Hepatic_Stellate_Cell_Activation	0.322461
Ethanol_Degradation_II	Regulation_of_the_Epithelial-Mesenchymal_Transition_Pathway	0.322463
Colorectal_Cancer_Metastasis_Signaling	Granzyme_A_Signaling	0.32247
Regulation_of_Cellular_Mechanics_by_Calpain_Protease	Chemokine_Signaling	0.322477
Dopamine_Degradation	LPS/IL-1_Mediated_Inhibition_of_RXR_Function	0.322477
Histamine_Degradation	Protein_Kinase_A_Signaling	0.32249
Axonal_Guidance_Signaling	Regulation_of_the_Epithelial-Mesenchymal_Transition_Pathway	0.322494
Putrescine_Degradation_III	LPS/IL-1_Mediated_Inhibition_of_RXR_Function	0.322507
HIF1__Signaling	Chemokine_Signaling	0.32251
LPS/IL-1_Mediated_Inhibition_of_RXR_Function	Semaphorin_Signaling_in_Neurons	0.322511
TR/RXR_Activation	Triacylglycerol_Biosynthesis	0.322517
TR/RXR_Activation	Basal_Cell_Carcinoma_Signaling	0.322517
TR/RXR_Activation	Heparan_Sulfate_Biosynthesis	0.322517
TR/RXR_Activation	Heparan_Sulfate_Biosynthesis_(Late_Stages)	0.322517
TR/RXR_Activation	Wnt/_-catenin_Signaling	0.322517
Oxidative_Ethanol_Degradation_III	Role_of_Macrophages,_Fibroblasts_and_Endothelial_Cells_in_Rheumatoid_Arthritis	0.322521
TR/RXR_Activation	Cardiac__-adrenergic_Signaling	0.322524
Assembly_of_RNA_Polymerase_II_Complex	Chemokine_Signaling	0.32253
Chondroitin_Sulfate_Biosynthesis	Inhibition_of_Matrix_Metalloproteases	0.322537
Dopamine_Degradation	Hepatic_Fibrosis_/_Hepatic_Stellate_Cell_Activation	0.322547
Intrinsic_Prothrombin_Activation_Pathway	CXCR4_Signaling	0.322548
G_s_Signaling	Atherosclerosis_Signaling	0.322554
G_s_Signaling	Role_of_Osteoblasts,_Osteoclasts_and_Chondrocytes_in_Rheumatoid_Arthritis	0.322554
FXR/RXR_Activation	Hepatic_Fibrosis_/_Hepatic_Stellate_Cell_Activation	0.322562
Chondroitin_Sulfate_Biosynthesis_(Late_Stages)	Ephrin_B_Signaling	0.322564
Chondroitin_Sulfate_Biosynthesis_(Late_Stages)	Signaling_by_Rho_Family_GTPases	0.322564
TR/RXR_Activation	Regulation_of_the_Epithelial-Mesenchymal_Transition_Pathway	0.322571
Estrogen-mediated_S-phase_Entry	Factors_Promoting_Cardiogenesis_in_Vertebrates	0.322587
Ethanol_Degradation_II	Protein_Kinase_A_Signaling	0.322591
Oxidative_Ethanol_Degradation_III	LPS/IL-1_Mediated_Inhibition_of_RXR_Function	0.322593
Protein_Ubiquitination_Pathway	Pancreatic_Adenocarcinoma_Signaling	0.322601
CXCR4_Signaling	Leukocyte_Extravasation_Signaling	0.322604
Chondroitin_Sulfate_Biosynthesis_(Late_Stages)	Ephrin_Receptor_Signaling	0.322607
Assembly_of_RNA_Polymerase_II_Complex	EIF2_Signaling	0.322614
Chondroitin_Sulfate_Biosynthesis	Atherosclerosis_Signaling	0.32262
Chondroitin_Sulfate_Biosynthesis	Role_of_Osteoblasts,_Osteoclasts_and_Chondrocytes_in_Rheumatoid_Arthritis	0.32262
Eicosanoid_Signaling	Hepatic_Fibrosis_/_Hepatic_Stellate_Cell_Activation	0.322627
Retinoate_Biosynthesis_I	Estrogen-mediated_S-phase_Entry	0.322632
Noradrenaline_and_Adrenaline_Degradation	EIF2_Signaling	0.322643
Regulation_of_Cellular_Mechanics_by_Calpain_Protease	EIF2_Signaling	0.322648
Putrescine_Degradation_III	Hepatic_Fibrosis_/_Hepatic_Stellate_Cell_Activation	0.322656
Axonal_Guidance_Signaling	Leukocyte_Extravasation_Signaling	0.322658
HIF1__Signaling	EIF2_Signaling	0.322683
Axonal_Guidance_Signaling	Protein_Kinase_A_Signaling	0.322686
Protein_Ubiquitination_Pathway	Histamine_Degradation	0.322686
Protein_Ubiquitination_Pathway	Estrogen-Dependent_Breast_Cancer_Signaling	0.322686
Colorectal_Cancer_Metastasis_Signaling	Ephrin_B_Signaling	0.322705
Colorectal_Cancer_Metastasis_Signaling	Signaling_by_Rho_Family_GTPases	0.322705
Retinoate_Biosynthesis_I	Intrinsic_Prothrombin_Activation_Pathway	0.322709
CXCR4_Signaling	G_Beta_Gamma_Signaling	0.322725
CXCR4_Signaling	Granzyme_A_Signaling	0.322725
CXCR4_Signaling	Thrombin_Signaling	0.322725
Intrinsic_Prothrombin_Activation_Pathway	Histamine_Degradation	0.322733
Chondroitin_Sulfate_Biosynthesis_(Late_Stages)	Coagulation_System	0.322745
Chondroitin_Sulfate_Biosynthesis_(Late_Stages)	VDR/RXR_Activation	0.322745
LPS/IL-1_Mediated_Inhibition_of_RXR_Function	Pregnenolone_Biosynthesis	0.322756
Pregnenolone_Biosynthesis	Role_of_Macrophages,_Fibroblasts_and_Endothelial_Cells_in_Rheumatoid_Arthritis	0.322769
Histamine_Degradation	Leukocyte_Extravasation_Signaling	0.322779
TR/RXR_Activation	Protein_Kinase_A_Signaling	0.322785
Dopamine_Degradation	Role_of_Macrophages,_Fibroblasts_and_Endothelial_Cells_in_Rheumatoid_Arthritis	0.322785
Axonal_Guidance_Signaling	Granzyme_A_Signaling	0.322785
Chondroitin_Sulfate_Biosynthesis_(Late_Stages)	Thyroid_Cancer_Signaling	0.322799
Chondroitin_Sulfate_Biosynthesis_(Late_Stages)	Tight_Junction_Signaling	0.322799
Histamine_Degradation	G_Beta_Gamma_Signaling	0.322799
Histamine_Degradation	Thrombin_Signaling	0.322799
Protein_Ubiquitination_Pathway	Triacylglycerol_Biosynthesis	0.3228
Protein_Ubiquitination_Pathway	Basal_Cell_Carcinoma_Signaling	0.3228
Protein_Ubiquitination_Pathway	Heparan_Sulfate_Biosynthesis	0.3228
Protein_Ubiquitination_Pathway	Heparan_Sulfate_Biosynthesis_(Late_Stages)	0.3228
Protein_Ubiquitination_Pathway	Wnt/_-catenin_Signaling	0.3228
Noradrenaline_and_Adrenaline_Degradation	Hepatic_Fibrosis_/_Hepatic_Stellate_Cell_Activation	0.322813
Colorectal_Cancer_Metastasis_Signaling	Ephrin_Receptor_Signaling	0.322815
FXR/RXR_Activation	Role_of_Macrophages,_Fibroblasts_and_Endothelial_Cells_in_Rheumatoid_Arthritis	0.322818
Acute_Phase_Response_Signaling	Hepatic_Fibrosis_/_Hepatic_Stellate_Cell_Activation	0.322824
LPS/IL-1_Mediated_Inhibition_of_RXR_Function	Eicosanoid_Signaling	0.322825
LPS/IL-1_Mediated_Inhibition_of_RXR_Function	Superoxide_Radicals_Degradation	0.322834
G_s_Signaling	Thyroid_Cancer_Signaling	0.322834
G_s_Signaling	Tight_Junction_Signaling	0.322834
Intrinsic_Prothrombin_Activation_Pathway	Ethanol_Degradation_II	0.322839
Pancreatic_Adenocarcinoma_Signaling	Estrogen-Dependent_Breast_Cancer_Signaling	0.322852
Estrogen-mediated_S-phase_Entry	Superoxide_Radicals_Degradation	0.322857
Intrinsic_Prothrombin_Activation_Pathway	Protein_Ubiquitination_Pathway	0.322869
Retinoate_Biosynthesis_I	CD28_Signaling_in_T_Helper_Cells	0.322876
Ethanol_Degradation_II	Leukocyte_Extravasation_Signaling	0.322879
Colorectal_Cancer_Metastasis_Signaling	Coagulation_System	0.322886
Colorectal_Cancer_Metastasis_Signaling	VDR/RXR_Activation	0.322886
Semaphorin_Signaling_in_Neurons	Role_of_Macrophages,_Fibroblasts_and_Endothelial_Cells_in_Rheumatoid_Arthritis	0.322887
Mitotic_Roles_of_Polo-Like_Kinase	Hepatic_Fibrosis_/_Hepatic_Stellate_Cell_Activation	0.322887
Ethanol_Degradation_II	G_Beta_Gamma_Signaling	0.322899
Ethanol_Degradation_II	Thrombin_Signaling	0.322899
Histamine_Degradation	Granzyme_A_Signaling	0.322899
Intrinsic_Prothrombin_Activation_Pathway	TR/RXR_Activation	0.32291
Putrescine_Degradation_III	Role_of_Macrophages,_Fibroblasts_and_Endothelial_Cells_in_Rheumatoid_Arthritis	0.322914
Fatty_Acid__-oxidation	Granulocyte_Adhesion_and_Diapedesis	0.322918
Intrinsic_Prothrombin_Activation_Pathway	Coagulation_System	0.322925
Intrinsic_Prothrombin_Activation_Pathway	VDR/RXR_Activation	0.322925
Triacylglycerol_Biosynthesis	Estrogen-Dependent_Breast_Cancer_Signaling	0.322933
Basal_Cell_Carcinoma_Signaling	Estrogen-Dependent_Breast_Cancer_Signaling	0.322933
Estrogen-Dependent_Breast_Cancer_Signaling	Heparan_Sulfate_Biosynthesis	0.322933
Estrogen-Dependent_Breast_Cancer_Signaling	Heparan_Sulfate_Biosynthesis_(Late_Stages)	0.322933
Estrogen-Dependent_Breast_Cancer_Signaling	Wnt/_-catenin_Signaling	0.322933
Chondroitin_Sulfate_Biosynthesis_(Late_Stages)	Inhibition_of_Matrix_Metalloproteases	0.322946
CXCR4_Signaling	Ephrin_B_Signaling	0.32296
CXCR4_Signaling	Signaling_by_Rho_Family_GTPases	0.32296
Pancreatic_Adenocarcinoma_Signaling	Triacylglycerol_Biosynthesis	0.32296
Pancreatic_Adenocarcinoma_Signaling	Basal_Cell_Carcinoma_Signaling	0.32296
Pancreatic_Adenocarcinoma_Signaling	Heparan_Sulfate_Biosynthesis	0.32296
Pancreatic_Adenocarcinoma_Signaling	Heparan_Sulfate_Biosynthesis_(Late_Stages)	0.32296
Pancreatic_Adenocarcinoma_Signaling	Wnt/_-catenin_Signaling	0.32296
Pancreatic_Adenocarcinoma_Signaling	Cardiac__-adrenergic_Signaling	0.322966
Protein_Ubiquitination_Pathway	Protein_Kinase_A_Signaling	0.32297
Colorectal_Cancer_Metastasis_Signaling	Thyroid_Cancer_Signaling	0.322973
Colorectal_Cancer_Metastasis_Signaling	Tight_Junction_Signaling	0.322973
Cardiac__-adrenergic_Signaling	Estrogen-Dependent_Breast_Cancer_Signaling	0.322973
TR/RXR_Activation	Leukocyte_Extravasation_Signaling	0.322986
Bladder_Cancer_Signaling	LPS/IL-1_Mediated_Inhibition_of_RXR_Function	0.322998
Ethanol_Degradation_II	Granzyme_A_Signaling	0.323
Estrogen-mediated_S-phase_Entry	Chondroitin_Sulfate_Biosynthesis	0.323013
Pancreatic_Adenocarcinoma_Signaling	Regulation_of_the_Epithelial-Mesenchymal_Transition_Pathway	0.323013
Estrogen-Dependent_Breast_Cancer_Signaling	Regulation_of_the_Epithelial-Mesenchymal_Transition_Pathway	0.32302
Retinoate_Biosynthesis_I	Chemokine_Signaling	0.323025
Chondroitin_Sulfate_Biosynthesis_(Late_Stages)	Atherosclerosis_Signaling	0.32303
Chondroitin_Sulfate_Biosynthesis_(Late_Stages)	Role_of_Osteoblasts,_Osteoclasts_and_Chondrocytes_in_Rheumatoid_Arthritis	0.32303
TR/RXR_Activation	G_Beta_Gamma_Signaling	0.32304
TR/RXR_Activation	Thrombin_Signaling	0.32304
Protein_Ubiquitination_Pathway	Cardiac__-adrenergic_Signaling	0.323041
CXCR4_Signaling	Ephrin_Receptor_Signaling	0.32307
Bladder_Cancer_Signaling	Granulocyte_Adhesion_and_Diapedesis	0.32308
Triacylglycerol_Biosynthesis	Cardiac__-adrenergic_Signaling	0.32308
Basal_Cell_Carcinoma_Signaling	Cardiac__-adrenergic_Signaling	0.32308
Cardiac__-adrenergic_Signaling	Heparan_Sulfate_Biosynthesis	0.32308
Cardiac__-adrenergic_Signaling	Heparan_Sulfate_Biosynthesis_(Late_Stages)	0.32308
Cardiac__-adrenergic_Signaling	Wnt/_-catenin_Signaling	0.32308
Protein_Ubiquitination_Pathway	Regulation_of_the_Epithelial-Mesenchymal_Transition_Pathway	0.323091
Regulation_of_Cellular_Mechanics_by_Calpain_Protease	Hepatic_Fibrosis_/_Hepatic_Stellate_Cell_Activation	0.323099
G_s_Signaling	CD28_Signaling_in_T_Helper_Cells	0.3231
Colorectal_Cancer_Metastasis_Signaling	Inhibition_of_Matrix_Metalloproteases	0.323101
TR/RXR_Activation	Granzyme_A_Signaling	0.323107
Retinoate_Biosynthesis_I	EIF2_Signaling	0.323108
Noradrenaline_and_Adrenaline_Degradation	Role_of_Macrophages,_Fibroblasts_and_Endothelial_Cells_in_Rheumatoid_Arthritis	0.323111
HIF1__Signaling	Hepatic_Fibrosis_/_Hepatic_Stellate_Cell_Activation	0.323132
Cardiac__-adrenergic_Signaling	Regulation_of_the_Epithelial-Mesenchymal_Transition_Pathway	0.323134
CXCR4_Signaling	Coagulation_System	0.323141
CXCR4_Signaling	VDR/RXR_Activation	0.323141
Estrogen-Dependent_Breast_Cancer_Signaling	Protein_Kinase_A_Signaling	0.323147
Axonal_Guidance_Signaling	Ephrin_B_Signaling	0.323148
Axonal_Guidance_Signaling	Signaling_by_Rho_Family_GTPases	0.323148
Assembly_of_RNA_Polymerase_II_Complex	Hepatic_Fibrosis_/_Hepatic_Stellate_Cell_Activation	0.323152
Triacylglycerol_Biosynthesis	Regulation_of_the_Epithelial-Mesenchymal_Transition_Pathway	0.323161
Basal_Cell_Carcinoma_Signaling	Regulation_of_the_Epithelial-Mesenchymal_Transition_Pathway	0.323161
Heparan_Sulfate_Biosynthesis	Regulation_of_the_Epithelial-Mesenchymal_Transition_Pathway	0.323161
Heparan_Sulfate_Biosynthesis_(Late_Stages)	Regulation_of_the_Epithelial-Mesenchymal_Transition_Pathway	0.323161
Regulation_of_the_Epithelial-Mesenchymal_Transition_Pathway	Wnt/_-catenin_Signaling	0.323161
Chondroitin_Sulfate_Biosynthesis	CD28_Signaling_in_T_Helper_Cells	0.323164
Pancreatic_Adenocarcinoma_Signaling	Protein_Kinase_A_Signaling	0.323174
Triacylglycerol_Biosynthesis	Basal_Cell_Carcinoma_Signaling	0.323174
Triacylglycerol_Biosynthesis	Heparan_Sulfate_Biosynthesis	0.323174
Triacylglycerol_Biosynthesis	Heparan_Sulfate_Biosynthesis_(Late_Stages)	0.323174
Triacylglycerol_Biosynthesis	Wnt/_-catenin_Signaling	0.323174
Basal_Cell_Carcinoma_Signaling	Heparan_Sulfate_Biosynthesis	0.323174
Basal_Cell_Carcinoma_Signaling	Heparan_Sulfate_Biosynthesis_(Late_Stages)	0.323174
Basal_Cell_Carcinoma_Signaling	Wnt/_-catenin_Signaling	0.323174
Heparan_Sulfate_Biosynthesis	Heparan_Sulfate_Biosynthesis_(Late_Stages)	0.323174
Heparan_Sulfate_Biosynthesis	Wnt/_-catenin_Signaling	0.323174
Heparan_Sulfate_Biosynthesis_(Late_Stages)	Wnt/_-catenin_Signaling	0.323174
Acute_Phase_Response_Signaling	Role_of_Macrophages,_Fibroblasts_and_Endothelial_Cells_in_Rheumatoid_Arthritis	0.32319
Eicosanoid_Signaling	Role_of_Macrophages,_Fibroblasts_and_Endothelial_Cells_in_Rheumatoid_Arthritis	0.323191
Colorectal_Cancer_Metastasis_Signaling	Atherosclerosis_Signaling	0.323204
Colorectal_Cancer_Metastasis_Signaling	Role_of_Osteoblasts,_Osteoclasts_and_Chondrocytes_in_Rheumatoid_Arthritis	0.323204
Axonal_Guidance_Signaling	Coagulation_System	0.323212
Axonal_Guidance_Signaling	VDR/RXR_Activation	0.323212
Protein_Ubiquitination_Pathway	Leukocyte_Extravasation_Signaling	0.323219
CXCR4_Signaling	Thyroid_Cancer_Signaling	0.323228
CXCR4_Signaling	Tight_Junction_Signaling	0.323228
Mitotic_Roles_of_Polo-Like_Kinase	Role_of_Macrophages,_Fibroblasts_and_Endothelial_Cells_in_Rheumatoid_Arthritis	0.323233
Ethanol_Degradation_II	Ephrin_B_Signaling	0.323235
Ethanol_Degradation_II	Signaling_by_Rho_Family_GTPases	0.323235
Histamine_Degradation	Ephrin_B_Signaling	0.323235
Histamine_Degradation	Signaling_by_Rho_Family_GTPases	0.323235
Histamine_Degradation	Ephrin_Receptor_Signaling	0.323244
Factors_Promoting_Cardiogenesis_in_Vertebrates	Granulocyte_Adhesion_and_Diapedesis	0.323264
Acute_Phase_Response_Signaling	LPS/IL-1_Mediated_Inhibition_of_RXR_Function	0.323268
G_s_Signaling	Chemokine_Signaling	0.323283
HIF1__Signaling	LPS/IL-1_Mediated_Inhibition_of_RXR_Function	0.323303
Chondroitin_Sulfate_Biosynthesis	Chemokine_Signaling	0.323308
Histamine_Degradation	Coagulation_System	0.323315
Histamine_Degradation	VDR/RXR_Activation	0.323315
Cardiac__-adrenergic_Signaling	Protein_Kinase_A_Signaling	0.323315
Regulation_of_Cellular_Mechanics_by_Calpain_Protease	LPS/IL-1_Mediated_Inhibition_of_RXR_Function	0.323324
G_s_Signaling	EIF2_Signaling	0.323339
Triacylglycerol_Biosynthesis	Protein_Kinase_A_Signaling	0.323342
Basal_Cell_Carcinoma_Signaling	Protein_Kinase_A_Signaling	0.323342
Heparan_Sulfate_Biosynthesis	Protein_Kinase_A_Signaling	0.323342
Heparan_Sulfate_Biosynthesis_(Late_Stages)	Protein_Kinase_A_Signaling	0.323342
Protein_Kinase_A_Signaling	Wnt/_-catenin_Signaling	0.323342
Ethanol_Degradation_II	Ephrin_Receptor_Signaling	0.323345
Protein_Ubiquitination_Pathway	Granzyme_A_Signaling	0.323347
Protein_Ubiquitination_Pathway	G_Beta_Gamma_Signaling	0.323354
Protein_Ubiquitination_Pathway	Thrombin_Signaling	0.323354
CXCR4_Signaling	Inhibition_of_Matrix_Metalloproteases	0.323355
TR/RXR_Activation	Ephrin_B_Signaling	0.323355
TR/RXR_Activation	Signaling_by_Rho_Family_GTPases	0.323355
Protein_Kinase_A_Signaling	Regulation_of_the_Epithelial-Mesenchymal_Transition_Pathway	0.323362
Regulation_of_Cellular_Mechanics_by_Calpain_Protease	Role_of_Macrophages,_Fibroblasts_and_Endothelial_Cells_in_Rheumatoid_Arthritis	0.32337
Intrinsic_Prothrombin_Activation_Pathway	Pancreatic_Adenocarcinoma_Signaling	0.323379
Assembly_of_RNA_Polymerase_II_Complex	LPS/IL-1_Mediated_Inhibition_of_RXR_Function	0.323381
Histamine_Degradation	Thyroid_Cancer_Signaling	0.323402
Histamine_Degradation	Tight_Junction_Signaling	0.323402
Glioma_Invasiveness_Signaling	Granulocyte_Adhesion_and_Diapedesis	0.323402
HIF1__Signaling	Role_of_Macrophages,_Fibroblasts_and_Endothelial_Cells_in_Rheumatoid_Arthritis	0.323404
Ethanol_Degradation_II	Coagulation_System	0.323416
Ethanol_Degradation_II	VDR/RXR_Activation	0.323416
Tryptophan_Degradation_X_(Mammalian,_via_Tryptamine)	Granulocyte_Adhesion_and_Diapedesis	0.323416
Assembly_of_RNA_Polymerase_II_Complex	Role_of_Macrophages,_Fibroblasts_and_Endothelial_Cells_in_Rheumatoid_Arthritis	0.323425
Intrinsic_Prothrombin_Activation_Pathway	Estrogen-Dependent_Breast_Cancer_Signaling	0.323429
Pancreatic_Adenocarcinoma_Signaling	Leukocyte_Extravasation_Signaling	0.323429
Axonal_Guidance_Signaling	Thyroid_Cancer_Signaling	0.323432
Axonal_Guidance_Signaling	Tight_Junction_Signaling	0.323432
Estrogen-Dependent_Breast_Cancer_Signaling	Leukocyte_Extravasation_Signaling	0.323436
CXCR4_Signaling	Atherosclerosis_Signaling	0.323439
CXCR4_Signaling	Role_of_Osteoblasts,_Osteoclasts_and_Chondrocytes_in_Rheumatoid_Arthritis	0.323439
LPS/IL-1_Mediated_Inhibition_of_RXR_Function	Noradrenaline_and_Adrenaline_Degradation	0.323439
Estrogen-mediated_S-phase_Entry	Chondroitin_Sulfate_Biosynthesis_(Late_Stages)	0.323446
Chondroitin_Sulfate_Biosynthesis	EIF2_Signaling	0.323449
Superoxide_Radicals_Degradation	Granulocyte_Adhesion_and_Diapedesis	0.323451
TR/RXR_Activation	Ephrin_Receptor_Signaling	0.323452
Estrogen-Dependent_Breast_Cancer_Signaling	G_Beta_Gamma_Signaling	0.323456
Estrogen-Dependent_Breast_Cancer_Signaling	Thrombin_Signaling	0.323456
Pancreatic_Adenocarcinoma_Signaling	G_Beta_Gamma_Signaling	0.323463
Pancreatic_Adenocarcinoma_Signaling	Thrombin_Signaling	0.323463
Axonal_Guidance_Signaling	Ephrin_Receptor_Signaling	0.323485
Ethanol_Degradation_II	Thyroid_Cancer_Signaling	0.323503
Ethanol_Degradation_II	Tight_Junction_Signaling	0.323503
Intrinsic_Prothrombin_Activation_Pathway	Cardiac__-adrenergic_Signaling	0.323507
Axonal_Guidance_Signaling	Inhibition_of_Matrix_Metalloproteases	0.32351
Triacylglycerol_Biosynthesis	Leukocyte_Extravasation_Signaling	0.323523
Basal_Cell_Carcinoma_Signaling	Leukocyte_Extravasation_Signaling	0.323523
Heparan_Sulfate_Biosynthesis	Leukocyte_Extravasation_Signaling	0.323523
Heparan_Sulfate_Biosynthesis_(Late_Stages)	Leukocyte_Extravasation_Signaling	0.323523
Leukocyte_Extravasation_Signaling	Wnt/_-catenin_Signaling	0.323523
Histamine_Degradation	Inhibition_of_Matrix_Metalloproteases	0.32353
TR/RXR_Activation	Coagulation_System	0.323536
TR/RXR_Activation	VDR/RXR_Activation	0.323536
Pancreatic_Adenocarcinoma_Signaling	Granzyme_A_Signaling	0.32355
Cardiac__-adrenergic_Signaling	Leukocyte_Extravasation_Signaling	0.32355
Estrogen-Dependent_Breast_Cancer_Signaling	Granzyme_A_Signaling	0.323557
Intrinsic_Prothrombin_Activation_Pathway	Regulation_of_the_Epithelial-Mesenchymal_Transition_Pathway	0.323557
Intrinsic_Prothrombin_Activation_Pathway	Triacylglycerol_Biosynthesis	0.323578
Intrinsic_Prothrombin_Activation_Pathway	Basal_Cell_Carcinoma_Signaling	0.323578
Intrinsic_Prothrombin_Activation_Pathway	Heparan_Sulfate_Biosynthesis	0.323578
Intrinsic_Prothrombin_Activation_Pathway	Heparan_Sulfate_Biosynthesis_(Late_Stages)	0.323578
Intrinsic_Prothrombin_Activation_Pathway	Wnt/_-catenin_Signaling	0.323578
Cardiac__-adrenergic_Signaling	G_Beta_Gamma_Signaling	0.323583
Cardiac__-adrenergic_Signaling	Thrombin_Signaling	0.323583
Chondroitin_Sulfate_Biosynthesis_(Late_Stages)	CD28_Signaling_in_T_Helper_Cells	0.323593
Triacylglycerol_Biosynthesis	G_Beta_Gamma_Signaling	0.323597
Triacylglycerol_Biosynthesis	Thrombin_Signaling	0.323597
Basal_Cell_Carcinoma_Signaling	G_Beta_Gamma_Signaling	0.323597
Basal_Cell_Carcinoma_Signaling	Thrombin_Signaling	0.323597
G_Beta_Gamma_Signaling	Heparan_Sulfate_Biosynthesis	0.323597
G_Beta_Gamma_Signaling	Heparan_Sulfate_Biosynthesis_(Late_Stages)	0.323597
G_Beta_Gamma_Signaling	Wnt/_-catenin_Signaling	0.323597
Heparan_Sulfate_Biosynthesis	Thrombin_Signaling	0.323597
Heparan_Sulfate_Biosynthesis_(Late_Stages)	Thrombin_Signaling	0.323597
Leukocyte_Extravasation_Signaling	Regulation_of_the_Epithelial-Mesenchymal_Transition_Pathway	0.323597
Thrombin_Signaling	Wnt/_-catenin_Signaling	0.323597
Axonal_Guidance_Signaling	Atherosclerosis_Signaling	0.323598
Axonal_Guidance_Signaling	Role_of_Osteoblasts,_Osteoclasts_and_Chondrocytes_in_Rheumatoid_Arthritis	0.323598
Histamine_Degradation	Atherosclerosis_Signaling	0.323613
Histamine_Degradation	Role_of_Osteoblasts,_Osteoclasts_and_Chondrocytes_in_Rheumatoid_Arthritis	0.323613
Ethanol_Degradation_II	Inhibition_of_Matrix_Metalloproteases	0.32363
Estrogen-mediated_S-phase_Entry	Colorectal_Cancer_Metastasis_Signaling	0.323631
Triacylglycerol_Biosynthesis	Granzyme_A_Signaling	0.323664
Basal_Cell_Carcinoma_Signaling	Granzyme_A_Signaling	0.323664
Granzyme_A_Signaling	Heparan_Sulfate_Biosynthesis	0.323664
Granzyme_A_Signaling	Heparan_Sulfate_Biosynthesis_(Late_Stages)	0.323664
Granzyme_A_Signaling	Wnt/_-catenin_Signaling	0.323664
Cardiac__-adrenergic_Signaling	Granzyme_A_Signaling	0.323671
TR/RXR_Activation	Thyroid_Cancer_Signaling	0.323677
TR/RXR_Activation	Tight_Junction_Signaling	0.323677
G_Beta_Gamma_Signaling	Regulation_of_the_Epithelial-Mesenchymal_Transition_Pathway	0.323684
Regulation_of_the_Epithelial-Mesenchymal_Transition_Pathway	Thrombin_Signaling	0.323684
Protein_Ubiquitination_Pathway	Ephrin_Receptor_Signaling	0.323712
Retinoate_Biosynthesis_I	Hepatic_Fibrosis_/_Hepatic_Stellate_Cell_Activation	0.323713
Ethanol_Degradation_II	Atherosclerosis_Signaling	0.323714
Ethanol_Degradation_II	Role_of_Osteoblasts,_Osteoclasts_and_Chondrocytes_in_Rheumatoid_Arthritis	0.323714
Chondroitin_Sulfate_Biosynthesis_(Late_Stages)	Chemokine_Signaling	0.323718
Granzyme_A_Signaling	Regulation_of_the_Epithelial-Mesenchymal_Transition_Pathway	0.323718
Retinoate_Biosynthesis_I	LPS/IL-1_Mediated_Inhibition_of_RXR_Function	0.323728
Colorectal_Cancer_Metastasis_Signaling	CD28_Signaling_in_T_Helper_Cells	0.323747
Intrinsic_Prothrombin_Activation_Pathway	Protein_Kinase_A_Signaling	0.323749
TR/RXR_Activation	Inhibition_of_Matrix_Metalloproteases	0.323771
Protein_Ubiquitination_Pathway	Coagulation_System	0.323773
Protein_Ubiquitination_Pathway	VDR/RXR_Activation	0.323773
Leukocyte_Extravasation_Signaling	Protein_Kinase_A_Signaling	0.323778
Ephrin_B_Signaling	Estrogen-Dependent_Breast_Cancer_Signaling	0.323791
Estrogen-Dependent_Breast_Cancer_Signaling	Signaling_by_Rho_Family_GTPases	0.323791
Pancreatic_Adenocarcinoma_Signaling	Ephrin_B_Signaling	0.323798
Pancreatic_Adenocarcinoma_Signaling	Signaling_by_Rho_Family_GTPases	0.323798
G_s_Signaling	Hepatic_Fibrosis_/_Hepatic_Stellate_Cell_Activation	0.323865
G_Beta_Gamma_Signaling	Protein_Kinase_A_Signaling	0.323865
Protein_Kinase_A_Signaling	Thrombin_Signaling	0.323865
Granzyme_A_Signaling	Protein_Kinase_A_Signaling	0.323879
Colorectal_Cancer_Metastasis_Signaling	Chemokine_Signaling	0.323892
Pancreatic_Adenocarcinoma_Signaling	Ephrin_Receptor_Signaling	0.323895
Estrogen-mediated_S-phase_Entry	CXCR4_Signaling	0.323901
Ephrin_Receptor_Signaling	Estrogen-Dependent_Breast_Cancer_Signaling	0.323902
Retinoate_Biosynthesis_I	Role_of_Macrophages,_Fibroblasts_and_Endothelial_Cells_in_Rheumatoid_Arthritis	0.323908
FXR/RXR_Activation	LPS/IL-1_Mediated_Inhibition_of_RXR_Function	0.323914
Protein_Ubiquitination_Pathway	Thyroid_Cancer_Signaling	0.323915
Protein_Ubiquitination_Pathway	Tight_Junction_Signaling	0.323915
Chondroitin_Sulfate_Biosynthesis_(Late_Stages)	EIF2_Signaling	0.323925
Chondroitin_Sulfate_Biosynthesis	Hepatic_Fibrosis_/_Hepatic_Stellate_Cell_Activation	0.32393
Triacylglycerol_Biosynthesis	Ephrin_B_Signaling	0.323932
Triacylglycerol_Biosynthesis	Signaling_by_Rho_Family_GTPases	0.323932
Basal_Cell_Carcinoma_Signaling	Ephrin_B_Signaling	0.323932
Basal_Cell_Carcinoma_Signaling	Signaling_by_Rho_Family_GTPases	0.323932
Ephrin_B_Signaling	Heparan_Sulfate_Biosynthesis	0.323932
Ephrin_B_Signaling	Heparan_Sulfate_Biosynthesis_(Late_Stages)	0.323932
Ephrin_B_Signaling	Wnt/_-catenin_Signaling	0.323932
Heparan_Sulfate_Biosynthesis	Signaling_by_Rho_Family_GTPases	0.323932
Heparan_Sulfate_Biosynthesis_(Late_Stages)	Signaling_by_Rho_Family_GTPases	0.323932
Signaling_by_Rho_Family_GTPases	Wnt/_-catenin_Signaling	0.323932
Axonal_Guidance_Signaling	Estrogen-mediated_S-phase_Entry	0.323955
Cardiac__-adrenergic_Signaling	Ephrin_B_Signaling	0.323972
Cardiac__-adrenergic_Signaling	Signaling_by_Rho_Family_GTPases	0.323972
Coagulation_System	Estrogen-Dependent_Breast_Cancer_Signaling	0.323972
Estrogen-Dependent_Breast_Cancer_Signaling	VDR/RXR_Activation	0.323972
TR/RXR_Activation	Atherosclerosis_Signaling	0.323975
TR/RXR_Activation	Role_of_Osteoblasts,_Osteoclasts_and_Chondrocytes_in_Rheumatoid_Arthritis	0.323975
Pancreatic_Adenocarcinoma_Signaling	Coagulation_System	0.323979
Pancreatic_Adenocarcinoma_Signaling	VDR/RXR_Activation	0.323979
Eicosanoid_Signaling	EIF2_Signaling	0.32398
Triacylglycerol_Biosynthesis	Ephrin_Receptor_Signaling	0.323989
Basal_Cell_Carcinoma_Signaling	Ephrin_Receptor_Signaling	0.323989
Ephrin_Receptor_Signaling	Heparan_Sulfate_Biosynthesis	0.323989
Ephrin_Receptor_Signaling	Heparan_Sulfate_Biosynthesis_(Late_Stages)	0.323989
Ephrin_Receptor_Signaling	Wnt/_-catenin_Signaling	0.323989
CXCR4_Signaling	CD28_Signaling_in_T_Helper_Cells	0.324002
Intrinsic_Prothrombin_Activation_Pathway	G_Beta_Gamma_Signaling	0.324004
Intrinsic_Prothrombin_Activation_Pathway	Thrombin_Signaling	0.324004
Cardiac__-adrenergic_Signaling	Ephrin_Receptor_Signaling	0.324016
Ephrin_B_Signaling	Regulation_of_the_Epithelial-Mesenchymal_Transition_Pathway	0.324019
Regulation_of_the_Epithelial-Mesenchymal_Transition_Pathway	Signaling_by_Rho_Family_GTPases	0.324019
G_Beta_Gamma_Signaling	Leukocyte_Extravasation_Signaling	0.324046
Leukocyte_Extravasation_Signaling	Thrombin_Signaling	0.324046
EIF2_Signaling	Colorectal_Cancer_Metastasis_Signaling	0.324049
Thyroid_Cancer_Signaling	Estrogen-Dependent_Breast_Cancer_Signaling	0.32406
Estrogen-Dependent_Breast_Cancer_Signaling	Tight_Junction_Signaling	0.32406
Ephrin_Receptor_Signaling	Regulation_of_the_Epithelial-Mesenchymal_Transition_Pathway	0.324062
Protein_Ubiquitination_Pathway	Inhibition_of_Matrix_Metalloproteases	0.324071
Estrogen-mediated_S-phase_Entry	Histamine_Degradation	0.324086
Pancreatic_Adenocarcinoma_Signaling	Thyroid_Cancer_Signaling	0.324086
Pancreatic_Adenocarcinoma_Signaling	Tight_Junction_Signaling	0.324086
LPS/IL-1_Mediated_Inhibition_of_RXR_Function	G_s_Signaling	0.324097
Cardiac__-adrenergic_Signaling	Coagulation_System	0.3241
Cardiac__-adrenergic_Signaling	VDR/RXR_Activation	0.3241
Triacylglycerol_Biosynthesis	Coagulation_System	0.324113
Triacylglycerol_Biosynthesis	VDR/RXR_Activation	0.324113
Basal_Cell_Carcinoma_Signaling	Coagulation_System	0.324113
Basal_Cell_Carcinoma_Signaling	VDR/RXR_Activation	0.324113
Coagulation_System	Heparan_Sulfate_Biosynthesis	0.324113
Coagulation_System	Heparan_Sulfate_Biosynthesis_(Late_Stages)	0.324113
Coagulation_System	Wnt/_-catenin_Signaling	0.324113
Heparan_Sulfate_Biosynthesis	VDR/RXR_Activation	0.324113
Heparan_Sulfate_Biosynthesis_(Late_Stages)	VDR/RXR_Activation	0.324113
VDR/RXR_Activation	Wnt/_-catenin_Signaling	0.324113
Granzyme_A_Signaling	Leukocyte_Extravasation_Signaling	0.324133
Coagulation_System	Regulation_of_the_Epithelial-Mesenchymal_Transition_Pathway	0.324147
Ephrin_B_Signaling	Protein_Kinase_A_Signaling	0.324147
Protein_Kinase_A_Signaling	Signaling_by_Rho_Family_GTPases	0.324147
Regulation_of_the_Epithelial-Mesenchymal_Transition_Pathway	VDR/RXR_Activation	0.324147
Protein_Ubiquitination_Pathway	Atherosclerosis_Signaling	0.32416
Protein_Ubiquitination_Pathway	Role_of_Osteoblasts,_Osteoclasts_and_Chondrocytes_in_Rheumatoid_Arthritis	0.32416
CXCR4_Signaling	Chemokine_Signaling	0.324167
G_Beta_Gamma_Signaling	Granzyme_A_Signaling	0.324167
Granzyme_A_Signaling	Thrombin_Signaling	0.324167
Estrogen-Dependent_Breast_Cancer_Signaling	Inhibition_of_Matrix_Metalloproteases	0.324187
Estrogen-mediated_S-phase_Entry	Ethanol_Degradation_II	0.324192
Axonal_Guidance_Signaling	CD28_Signaling_in_T_Helper_Cells	0.324195
Thyroid_Cancer_Signaling	Triacylglycerol_Biosynthesis	0.3242
Thyroid_Cancer_Signaling	Basal_Cell_Carcinoma_Signaling	0.3242
Thyroid_Cancer_Signaling	Heparan_Sulfate_Biosynthesis	0.3242
Thyroid_Cancer_Signaling	Heparan_Sulfate_Biosynthesis_(Late_Stages)	0.3242
Thyroid_Cancer_Signaling	Wnt/_-catenin_Signaling	0.3242
Triacylglycerol_Biosynthesis	Tight_Junction_Signaling	0.3242
Basal_Cell_Carcinoma_Signaling	Tight_Junction_Signaling	0.3242
Heparan_Sulfate_Biosynthesis	Tight_Junction_Signaling	0.3242
Heparan_Sulfate_Biosynthesis_(Late_Stages)	Tight_Junction_Signaling	0.3242
Tight_Junction_Signaling	Wnt/_-catenin_Signaling	0.3242
LPS/IL-1_Mediated_Inhibition_of_RXR_Function	Chondroitin_Sulfate_Biosynthesis	0.324205
Thyroid_Cancer_Signaling	Cardiac__-adrenergic_Signaling	0.324207
Cardiac__-adrenergic_Signaling	Tight_Junction_Signaling	0.324207
Pancreatic_Adenocarcinoma_Signaling	Inhibition_of_Matrix_Metalloproteases	0.324214
G_Beta_Gamma_Signaling	Thrombin_Signaling	0.324221
Chondroitin_Sulfate_Biosynthesis	Role_of_Macrophages,_Fibroblasts_and_Endothelial_Cells_in_Rheumatoid_Arthritis	0.324226
Histamine_Degradation	CD28_Signaling_in_T_Helper_Cells	0.32423
Oxidative_Ethanol_Degradation_III	Granulocyte_Adhesion_and_Diapedesis	0.324231
G_s_Signaling	Role_of_Macrophages,_Fibroblasts_and_Endothelial_Cells_in_Rheumatoid_Arthritis	0.324231
Thyroid_Cancer_Signaling	Regulation_of_the_Epithelial-Mesenchymal_Transition_Pathway	0.324234
Regulation_of_the_Epithelial-Mesenchymal_Transition_Pathway	Tight_Junction_Signaling	0.324234
Estrogen-mediated_S-phase_Entry	Thyroid_Cancer_Signaling	0.324239
Estrogen-mediated_S-phase_Entry	Tight_Junction_Signaling	0.324239
Ephrin_Receptor_Signaling	Protein_Kinase_A_Signaling	0.324244
Atherosclerosis_Signaling	Estrogen-Dependent_Breast_Cancer_Signaling	0.32427
Estrogen-Dependent_Breast_Cancer_Signaling	Role_of_Osteoblasts,_Osteoclasts_and_Chondrocytes_in_Rheumatoid_Arthritis	0.32427
Ethanol_Degradation_II	CD28_Signaling_in_T_Helper_Cells	0.324277
Semaphorin_Signaling_in_Neurons	Granulocyte_Adhesion_and_Diapedesis	0.32429
Histamine_Degradation	Chemokine_Signaling	0.324308
CXCR4_Signaling	EIF2_Signaling	0.324311
Pancreatic_Adenocarcinoma_Signaling	Atherosclerosis_Signaling	0.324317
Pancreatic_Adenocarcinoma_Signaling	Role_of_Osteoblasts,_Osteoclasts_and_Chondrocytes_in_Rheumatoid_Arthritis	0.324317
Coagulation_System	Protein_Kinase_A_Signaling	0.324328
Protein_Kinase_A_Signaling	VDR/RXR_Activation	0.324328
Cardiac__-adrenergic_Signaling	Inhibition_of_Matrix_Metalloproteases	0.324335
Chondroitin_Sulfate_Biosynthesis_(Late_Stages)	Hepatic_Fibrosis_/_Hepatic_Stellate_Cell_Activation	0.324339
Intrinsic_Prothrombin_Activation_Pathway	Ephrin_B_Signaling	0.32436
Intrinsic_Prothrombin_Activation_Pathway	Signaling_by_Rho_Family_GTPases	0.32436
Intrinsic_Prothrombin_Activation_Pathway	Leukocyte_Extravasation_Signaling	0.32437
Triacylglycerol_Biosynthesis	Inhibition_of_Matrix_Metalloproteases	0.324382
Basal_Cell_Carcinoma_Signaling	Inhibition_of_Matrix_Metalloproteases	0.324382
Ephrin_B_Signaling	Leukocyte_Extravasation_Signaling	0.324382
Heparan_Sulfate_Biosynthesis	Inhibition_of_Matrix_Metalloproteases	0.324382
Heparan_Sulfate_Biosynthesis_(Late_Stages)	Inhibition_of_Matrix_Metalloproteases	0.324382
Inhibition_of_Matrix_Metalloproteases	Wnt/_-catenin_Signaling	0.324382
Leukocyte_Extravasation_Signaling	Signaling_by_Rho_Family_GTPases	0.324382
Inhibition_of_Matrix_Metalloproteases	Regulation_of_the_Epithelial-Mesenchymal_Transition_Pathway	0.324402
Ethanol_Degradation_II	Chemokine_Signaling	0.324408
Triacylglycerol_Biosynthesis	Atherosclerosis_Signaling	0.324411
Triacylglycerol_Biosynthesis	Role_of_Osteoblasts,_Osteoclasts_and_Chondrocytes_in_Rheumatoid_Arthritis	0.324411
Atherosclerosis_Signaling	Basal_Cell_Carcinoma_Signaling	0.324411
Atherosclerosis_Signaling	Heparan_Sulfate_Biosynthesis	0.324411
Atherosclerosis_Signaling	Heparan_Sulfate_Biosynthesis_(Late_Stages)	0.324411
Atherosclerosis_Signaling	Wnt/_-catenin_Signaling	0.324411
Basal_Cell_Carcinoma_Signaling	Role_of_Osteoblasts,_Osteoclasts_and_Chondrocytes_in_Rheumatoid_Arthritis	0.324411
Heparan_Sulfate_Biosynthesis	Role_of_Osteoblasts,_Osteoclasts_and_Chondrocytes_in_Rheumatoid_Arthritis	0.324411
Heparan_Sulfate_Biosynthesis_(Late_Stages)	Role_of_Osteoblasts,_Osteoclasts_and_Chondrocytes_in_Rheumatoid_Arthritis	0.324411
Role_of_Osteoblasts,_Osteoclasts_and_Chondrocytes_in_Rheumatoid_Arthritis	Wnt/_-catenin_Signaling	0.324411
TR/RXR_Activation	CD28_Signaling_in_T_Helper_Cells	0.324418
Pregnenolone_Biosynthesis	Granulocyte_Adhesion_and_Diapedesis	0.324424
Thyroid_Cancer_Signaling	Protein_Kinase_A_Signaling	0.324435
Protein_Kinase_A_Signaling	Tight_Junction_Signaling	0.324435
Intrinsic_Prothrombin_Activation_Pathway	Granzyme_A_Signaling	0.324438
Atherosclerosis_Signaling	Cardiac__-adrenergic_Signaling	0.324438
Cardiac__-adrenergic_Signaling	Role_of_Osteoblasts,_Osteoclasts_and_Chondrocytes_in_Rheumatoid_Arthritis	0.324438
Ephrin_B_Signaling	G_Beta_Gamma_Signaling	0.324455
Ephrin_B_Signaling	Thrombin_Signaling	0.324455
G_Beta_Gamma_Signaling	Signaling_by_Rho_Family_GTPases	0.324455
Signaling_by_Rho_Family_GTPases	Thrombin_Signaling	0.324455
Axonal_Guidance_Signaling	Chemokine_Signaling	0.324462
Ephrin_Receptor_Signaling	Leukocyte_Extravasation_Signaling	0.324478
Atherosclerosis_Signaling	Regulation_of_the_Epithelial-Mesenchymal_Transition_Pathway	0.324485
Regulation_of_the_Epithelial-Mesenchymal_Transition_Pathway	Role_of_Osteoblasts,_Osteoclasts_and_Chondrocytes_in_Rheumatoid_Arthritis	0.324485
Intrinsic_Prothrombin_Activation_Pathway	Ephrin_Receptor_Signaling	0.324491
Protein_Ubiquitination_Pathway	Estrogen-mediated_S-phase_Entry	0.324493
Colorectal_Cancer_Metastasis_Signaling	Hepatic_Fibrosis_/_Hepatic_Stellate_Cell_Activation	0.3245
Axonal_Guidance_Signaling	EIF2_Signaling	0.3245
Ephrin_B_Signaling	Granzyme_A_Signaling	0.324502
Granzyme_A_Signaling	Signaling_by_Rho_Family_GTPases	0.324502
FXR/RXR_Activation	Granulocyte_Adhesion_and_Diapedesis	0.324527
Ephrin_Receptor_Signaling	G_Beta_Gamma_Signaling	0.324565
Ephrin_Receptor_Signaling	Thrombin_Signaling	0.324565
Estrogen-mediated_S-phase_Entry	TR/RXR_Activation	0.324576
TR/RXR_Activation	Chemokine_Signaling	0.324583
Inhibition_of_Matrix_Metalloproteases	Protein_Kinase_A_Signaling	0.324583
Eicosanoid_Signaling	Granulocyte_Adhesion_and_Diapedesis	0.324594
EIF2_Signaling	Ethanol_Degradation_II	0.324594
Ephrin_Receptor_Signaling	Granzyme_A_Signaling	0.324599
Coagulation_System	G_Beta_Gamma_Signaling	0.324603
Coagulation_System	Thrombin_Signaling	0.324603
G_Beta_Gamma_Signaling	VDR/RXR_Activation	0.324603
Thrombin_Signaling	VDR/RXR_Activation	0.324603
[truncated: 629 more rows]
