# Supplementary material for: In silico identification of drug target pathways in breast cancer subtypes using pathway cross-talk inhibition
Source: J Transl Med. 2018 Jun 5;16:154. doi: 10.1186/s12967-018-1535-2 (PMC5989433; doi:10.1186/s12967-018-1535-2)
Supplement: Supplementary file 2 — Additional file 2. Shows the network efficiency after inhibition of individual and combined pathway(s) in luminal B BC. [file 12967_2018_1535_MOESM2_ESM.xlsx]

## Sheet: luminal B NE individual pathway
Pathway	NE
Cell_Cycle_Control_of_Chromosomal_Replication	0.312335
P2Y_Purigenic_Receptor_Signaling_Pathway	0.315121
Growth_Hormone_Signaling	0.318736
Epithelial_Adherens_Junction_Signaling	0.319654
Regulation_of_the_Epithelial-Mesenchymal_Transition_Pathway	0.320172
Mitotic_Roles_of_Polo-Like_Kinase	0.320703
Tight_Junction_Signaling	0.321756
Role_of_BRCA1_in_DNA_Damage_Response	0.322375
Cellular_Effects_of_Sildenafil_(Viagra)	0.324228
Cell_Cycle:_G2/M_DNA_Damage_Checkpoint_Regulation	0.324893
Retinoate_Biosynthesis_I	0.325095
EIF2_Signaling	0.325164
Wnt/_-catenin_Signaling	0.325443
Basal_Cell_Carcinoma_Signaling	0.325486
Tryptophan_Degradation_X_(Mammalian,_via_Tryptamine)	0.325538
Putrescine_Degradation_III	0.325571
Oxidative_Ethanol_Degradation_III	0.325571
Ethanol_Degradation_IV	0.325571
Germ_Cell-Sertoli_Cell_Junction_Signaling	0.325679
Triacylglycerol_Biosynthesis	0.325708
Axonal_Guidance_Signaling	0.325853
Prolactin_Signaling	0.326188
Nitric_Oxide_Signaling_in_the_Cardiovascular_System	0.326308
Ephrin_Receptor_Signaling	0.326419
RhoA_Signaling	0.326712
Role_of_Osteoblasts,_Osteoclasts_and_Chondrocytes_in_Rheumatoid_Arthritis	0.326745
Estrogen-mediated_S-phase_Entry	0.327093
Factors_Promoting_Cardiogenesis_in_Vertebrates	0.327338
Glioblastoma_Multiforme_Signaling	0.327338
ILK_Signaling	0.327338
Signaling_by_Rho_Family_GTPases	0.327338
RAR_Activation	0.327338
Integrin_Signaling	0.327338
Agranulocyte_Adhesion_and_Diapedesis	0.327338
Regulation_of_Actin-based_Motility_by_Rho	0.327338
Calcium_Signaling	0.327547
IL-6_Signaling	0.327547
Assembly_of_RNA_Polymerase_II_Complex	0.327814
HIF1__Signaling	0.327856
Bladder_Cancer_Signaling	0.327856
Eicosanoid_Signaling	0.327977
Ethanol_Degradation_II	0.327977
Noradrenaline_and_Adrenaline_Degradation	0.327977
Role_of_JAK2_in_Hormone-like_Cytokine_Signaling	0.327977
Triacylglycerol_Degradation	0.327977
Human_Embryonic_Stem_Cell_Pluripotency	0.327977
p38_MAPK_Signaling	0.327977
CDK5_Signaling	0.328036
Fatty_Acid__-oxidation	0.328036
Histamine_Degradation	0.328036
Granzyme_A_Signaling	0.328088
CD28_Signaling_in_T_Helper_Cells	0.328329
Antioxidant_Action_of_Vitamin_C	0.328329
Colorectal_Cancer_Metastasis_Signaling	0.328394
Sertoli_Cell-Sertoli_Cell_Junction_Signaling	0.328394
Thrombin_Signaling	0.328394
IL-8_Signaling	0.328688
tRNA_Charging	0.329068
Coagulation_System	0.329162
Thyroid_Cancer_Signaling	0.329264
Dendritic_Cell_Maturation	0.32933
Estrogen-Dependent_Breast_Cancer_Signaling	0.32963
Estrogen_Receptor_Signaling	0.329651
_-linolenate_Biosynthesis_II_(Animals)	0.329701
FXR/RXR_Activation	0.329701
Role_of_Macrophages,_Fibroblasts_and_Endothelial_Cells_in_Rheumatoid_Arthritis	0.329975
HMGB1_Signaling	0.330738
Acute_Phase_Response_Signaling	0.330959
Salvage_Pathways_of_Pyrimidine_Deoxyribonucleotides	0.331615
LPS/IL-1_Mediated_Inhibition_of_RXR_Function	0.332954
Molecular_Mechanisms_of_Cancer	0.333186
Intrinsic_Prothrombin_Activation_Pathway	0.345631
Extrinsic_Prothrombin_Activation_Pathway	0.345631

## Sheet: luminal B NE combined pathways
Pathway 1	Pathway 2	NE
Growth_Hormone_Signaling	Regulation_of_the_Epithelial-Mesenchymal_Transition_Pathway	0.293577656414679
Mitotic_Roles_of_Polo-Like_Kinase	Cell_Cycle_Control_of_Chromosomal_Replication	0.297774091421632
Cell_Cycle_Control_of_Chromosomal_Replication	Growth_Hormone_Signaling	0.297831330599873
Mitotic_Roles_of_Polo-Like_Kinase	Cell_Cycle:_G2/M_DNA_Damage_Checkpoint_Regulation	0.30146416989735
Cell_Cycle_Control_of_Chromosomal_Replication	Role_of_BRCA1_in_DNA_Damage_Response	0.3024489744639
Cell_Cycle_Control_of_Chromosomal_Replication	P2Y_Purigenic_Receptor_Signaling_Pathway	0.303426146578034
Assembly_of_RNA_Polymerase_II_Complex	Regulation_of_the_Epithelial-Mesenchymal_Transition_Pathway	0.304678760393046
Cell_Cycle_Control_of_Chromosomal_Replication	Epithelial_Adherens_Junction_Signaling	0.305239414606422
Cell_Cycle_Control_of_Chromosomal_Replication	Tight_Junction_Signaling	0.305569933287325
Mitotic_Roles_of_Polo-Like_Kinase	P2Y_Purigenic_Receptor_Signaling_Pathway	0.306154146246312
Growth_Hormone_Signaling	P2Y_Purigenic_Receptor_Signaling_Pathway	0.306181853022899
Epithelial_Adherens_Junction_Signaling	P2Y_Purigenic_Receptor_Signaling_Pathway	0.307650665900163
Regulation_of_the_Epithelial-Mesenchymal_Transition_Pathway	P2Y_Purigenic_Receptor_Signaling_Pathway	0.307955351154546
Cell_Cycle_Control_of_Chromosomal_Replication	Retinoate_Biosynthesis_I	0.308408604987889
Cell_Cycle_Control_of_Chromosomal_Replication	EIF2_Signaling	0.308497017079107
Cell_Cycle_Control_of_Chromosomal_Replication	Germ_Cell-Sertoli_Cell_Junction_Signaling	0.309445831472686
Cell_Cycle_Control_of_Chromosomal_Replication	Cell_Cycle:_G2/M_DNA_Damage_Checkpoint_Regulation	0.309550366040136
Role_of_BRCA1_in_DNA_Damage_Response	P2Y_Purigenic_Receptor_Signaling_Pathway	0.309555271383916
Cell_Cycle_Control_of_Chromosomal_Replication	Cellular_Effects_of_Sildenafil_(Viagra)	0.309578783204103
Tight_Junction_Signaling	P2Y_Purigenic_Receptor_Signaling_Pathway	0.309845741113347
Mitotic_Roles_of_Polo-Like_Kinase	Epithelial_Adherens_Junction_Signaling	0.309966555319858
Cell_Cycle_Control_of_Chromosomal_Replication	Tryptophan_Degradation_X_(Mammalian,_via_Tryptamine)	0.309983727790633
Cell_Cycle_Control_of_Chromosomal_Replication	Triacylglycerol_Biosynthesis	0.310225273684353
Epithelial_Adherens_Junction_Signaling	Growth_Hormone_Signaling	0.310635719076363
Cell_Cycle_Control_of_Chromosomal_Replication	Regulation_of_the_Epithelial-Mesenchymal_Transition_Pathway	0.310862630076185
Mitotic_Roles_of_Polo-Like_Kinase	Regulation_of_the_Epithelial-Mesenchymal_Transition_Pathway	0.311054015393493
Cell_Cycle_Control_of_Chromosomal_Replication	Basal_Cell_Carcinoma_Signaling	0.311113310058323
Cell_Cycle_Control_of_Chromosomal_Replication	Wnt/_-catenin_Signaling	0.311214062739524
Cell_Cycle_Control_of_Chromosomal_Replication	Assembly_of_RNA_Polymerase_II_Complex	0.311290187716878
Cell_Cycle_Control_of_Chromosomal_Replication	RhoA_Signaling	0.311319334497084
Cell_Cycle_Control_of_Chromosomal_Replication	Putrescine_Degradation_III	0.311354855952043
Cell_Cycle_Control_of_Chromosomal_Replication	Oxidative_Ethanol_Degradation_III	0.311354855952043
Cell_Cycle_Control_of_Chromosomal_Replication	Ethanol_Degradation_IV	0.311354855952043
Cell_Cycle_Control_of_Chromosomal_Replication	Role_of_Osteoblasts,_Osteoclasts_and_Chondrocytes_in_Rheumatoid_Arthritis	0.311354855952043
Epithelial_Adherens_Junction_Signaling	Regulation_of_the_Epithelial-Mesenchymal_Transition_Pathway	0.311430487688033
Cell_Cycle_Control_of_Chromosomal_Replication	Estrogen-mediated_S-phase_Entry	0.311550615270984
Cell_Cycle_Control_of_Chromosomal_Replication	Factors_Promoting_Cardiogenesis_in_Vertebrates	0.312001346432293
Cell_Cycle_Control_of_Chromosomal_Replication	Glioblastoma_Multiforme_Signaling	0.312001346432293
Cell_Cycle_Control_of_Chromosomal_Replication	ILK_Signaling	0.312001346432293
Cell_Cycle_Control_of_Chromosomal_Replication	Signaling_by_Rho_Family_GTPases	0.312001346432293
Cell_Cycle_Control_of_Chromosomal_Replication	RAR_Activation	0.312001346432293
Cell_Cycle_Control_of_Chromosomal_Replication	Integrin_Signaling	0.312001346432293
Cell_Cycle_Control_of_Chromosomal_Replication	Agranulocyte_Adhesion_and_Diapedesis	0.312001346432293
Cell_Cycle_Control_of_Chromosomal_Replication	Regulation_of_Actin-based_Motility_by_Rho	0.312001346432293
Cellular_Effects_of_Sildenafil_(Viagra)	P2Y_Purigenic_Receptor_Signaling_Pathway	0.312018779342723
Cell_Cycle_Control_of_Chromosomal_Replication	Calcium_Signaling	0.312334779322357
Cell_Cycle_Control_of_Chromosomal_Replication	IL-6_Signaling	0.312334779322357
EIF2_Signaling	P2Y_Purigenic_Receptor_Signaling_Pathway	0.312457881703406
Cell_Cycle_Control_of_Chromosomal_Replication	tRNA_Charging	0.312529877529878
Cell_Cycle:_G2/M_DNA_Damage_Checkpoint_Regulation	P2Y_Purigenic_Receptor_Signaling_Pathway	0.312582159624413
Mitotic_Roles_of_Polo-Like_Kinase	Role_of_BRCA1_in_DNA_Damage_Response	0.31260343481655
Cell_Cycle_Control_of_Chromosomal_Replication	HIF1__Signaling	0.31264377731769
Cell_Cycle_Control_of_Chromosomal_Replication	Bladder_Cancer_Signaling	0.31264377731769
Mitotic_Roles_of_Polo-Like_Kinase	Tight_Junction_Signaling	0.31264599029576
Retinoate_Biosynthesis_I	P2Y_Purigenic_Receptor_Signaling_Pathway	0.312723004694836
Cell_Cycle_Control_of_Chromosomal_Replication	Fatty_Acid__-oxidation	0.312761505568411
Cell_Cycle_Control_of_Chromosomal_Replication	Histamine_Degradation	0.312761505568411
Cell_Cycle_Control_of_Chromosomal_Replication	Eicosanoid_Signaling	0.312813265402779
Cell_Cycle_Control_of_Chromosomal_Replication	Ethanol_Degradation_II	0.312813265402779
Cell_Cycle_Control_of_Chromosomal_Replication	Noradrenaline_and_Adrenaline_Degradation	0.312813265402779
Cell_Cycle_Control_of_Chromosomal_Replication	Role_of_JAK2_in_Hormone-like_Cytokine_Signaling	0.312813265402779
Cell_Cycle_Control_of_Chromosomal_Replication	Nitric_Oxide_Signaling_in_the_Cardiovascular_System	0.312813265402779
Cell_Cycle_Control_of_Chromosomal_Replication	Triacylglycerol_Degradation	0.312813265402779
Cell_Cycle_Control_of_Chromosomal_Replication	Human_Embryonic_Stem_Cell_Pluripotency	0.312813265402779
Cell_Cycle_Control_of_Chromosomal_Replication	p38_MAPK_Signaling	0.312813265402779
Cell_Cycle_Control_of_Chromosomal_Replication	Ephrin_Receptor_Signaling	0.312821384592484
Cell_Cycle_Control_of_Chromosomal_Replication	CDK5_Signaling	0.312821384592484
Epithelial_Adherens_Junction_Signaling	Cellular_Effects_of_Sildenafil_(Viagra)	0.312825524576028
Wnt/_-catenin_Signaling	P2Y_Purigenic_Receptor_Signaling_Pathway	0.312912353347136
Growth_Hormone_Signaling	Tight_Junction_Signaling	0.313026731819488
Tryptophan_Degradation_X_(Mammalian,_via_Tryptamine)	P2Y_Purigenic_Receptor_Signaling_Pathway	0.31317907444668
Cell_Cycle_Control_of_Chromosomal_Replication	CD28_Signaling_in_T_Helper_Cells	0.313187763027916
Cell_Cycle_Control_of_Chromosomal_Replication	Antioxidant_Action_of_Vitamin_C	0.313187763027916
Cell_Cycle_Control_of_Chromosomal_Replication	Colorectal_Cancer_Metastasis_Signaling	0.313212120597031
Cell_Cycle_Control_of_Chromosomal_Replication	Sertoli_Cell-Sertoli_Cell_Junction_Signaling	0.313212120597031
Cell_Cycle_Control_of_Chromosomal_Replication	Thrombin_Signaling	0.313212120597031
Putrescine_Degradation_III	P2Y_Purigenic_Receptor_Signaling_Pathway	0.31327967806841
Oxidative_Ethanol_Degradation_III	P2Y_Purigenic_Receptor_Signaling_Pathway	0.31327967806841
Ethanol_Degradation_IV	P2Y_Purigenic_Receptor_Signaling_Pathway	0.31327967806841
Basal_Cell_Carcinoma_Signaling	P2Y_Purigenic_Receptor_Signaling_Pathway	0.313313212608987
P2Y_Purigenic_Receptor_Signaling_Pathway	Germ_Cell-Sertoli_Cell_Junction_Signaling	0.313323752036026
Cell_Cycle_Control_of_Chromosomal_Replication	Granzyme_A_Signaling	0.313347102125874
P2Y_Purigenic_Receptor_Signaling_Pathway	Triacylglycerol_Biosynthesis	0.313353454057679
Cell_Cycle_Control_of_Chromosomal_Replication	Coagulation_System	0.313401654194016
Cell_Cycle_Control_of_Chromosomal_Replication	IL-8_Signaling	0.31353181369166
Epithelial_Adherens_Junction_Signaling	Role_of_BRCA1_in_DNA_Damage_Response	0.313606239597288
Role_of_BRCA1_in_DNA_Damage_Response	Regulation_of_the_Epithelial-Mesenchymal_Transition_Pathway	0.313627721620049
Epithelial_Adherens_Junction_Signaling	Tight_Junction_Signaling	0.313890485771773
P2Y_Purigenic_Receptor_Signaling_Pathway	Prolactin_Signaling	0.313987735939446
Cell_Cycle_Control_of_Chromosomal_Replication	Thyroid_Cancer_Signaling	0.314029114061083
P2Y_Purigenic_Receptor_Signaling_Pathway	Nitric_Oxide_Signaling_in_the_Cardiovascular_System	0.314037558685446
Cell_Cycle_Control_of_Chromosomal_Replication	Dendritic_Cell_Maturation	0.314085948389017
Mitotic_Roles_of_Polo-Like_Kinase	Growth_Hormone_Signaling	0.314191841611196
Ephrin_Receptor_Signaling	P2Y_Purigenic_Receptor_Signaling_Pathway	0.314272300469484
Growth_Hormone_Signaling	Cellular_Effects_of_Sildenafil_(Viagra)	0.314321165085753
RhoA_Signaling	P2Y_Purigenic_Receptor_Signaling_Pathway	0.314386317907445
P2Y_Purigenic_Receptor_Signaling_Pathway	Role_of_Osteoblasts,_Osteoclasts_and_Chondrocytes_in_Rheumatoid_Arthritis	0.314419852448021
Tight_Junction_Signaling	Regulation_of_the_Epithelial-Mesenchymal_Transition_Pathway	0.31456421066079
Cell_Cycle_Control_of_Chromosomal_Replication	Axonal_Guidance_Signaling	0.314620292561469
Cell_Cycle_Control_of_Chromosomal_Replication	Prolactin_Signaling	0.314671037497124
Cell_Cycle_Control_of_Chromosomal_Replication	Estrogen-Dependent_Breast_Cancer_Signaling	0.314671037497124
EIF2_Signaling	Regulation_of_the_Epithelial-Mesenchymal_Transition_Pathway	0.314926115373686
Cell_Cycle_Control_of_Chromosomal_Replication	_-linolenate_Biosynthesis_II_(Animals)	0.314983626300762
Cell_Cycle_Control_of_Chromosomal_Replication	FXR/RXR_Activation	0.314983626300762
Factors_Promoting_Cardiogenesis_in_Vertebrates	P2Y_Purigenic_Receptor_Signaling_Pathway	0.315030181086519
Glioblastoma_Multiforme_Signaling	P2Y_Purigenic_Receptor_Signaling_Pathway	0.315030181086519
ILK_Signaling	P2Y_Purigenic_Receptor_Signaling_Pathway	0.315030181086519
P2Y_Purigenic_Receptor_Signaling_Pathway	Signaling_by_Rho_Family_GTPases	0.315030181086519
P2Y_Purigenic_Receptor_Signaling_Pathway	RAR_Activation	0.315030181086519
P2Y_Purigenic_Receptor_Signaling_Pathway	Integrin_Signaling	0.315030181086519
P2Y_Purigenic_Receptor_Signaling_Pathway	Agranulocyte_Adhesion_and_Diapedesis	0.315030181086519
P2Y_Purigenic_Receptor_Signaling_Pathway	Regulation_of_Actin-based_Motility_by_Rho	0.315030181086519
Assembly_of_RNA_Polymerase_II_Complex	P2Y_Purigenic_Receptor_Signaling_Pathway	0.315238095238095
Calcium_Signaling	P2Y_Purigenic_Receptor_Signaling_Pathway	0.315311871227364
P2Y_Purigenic_Receptor_Signaling_Pathway	Axonal_Guidance_Signaling	0.315311871227364
P2Y_Purigenic_Receptor_Signaling_Pathway	IL-6_Signaling	0.315311871227364
Estrogen-mediated_S-phase_Entry	P2Y_Purigenic_Receptor_Signaling_Pathway	0.315341614906832
Cell_Cycle_Control_of_Chromosomal_Replication	Salvage_Pathways_of_Pyrimidine_Deoxyribonucleotides	0.315406149709428
Growth_Hormone_Signaling	Role_of_BRCA1_in_DNA_Damage_Response	0.315472130881338
Cell_Cycle_Control_of_Chromosomal_Replication	Role_of_Macrophages,_Fibroblasts_and_Endothelial_Cells_in_Rheumatoid_Arthritis	0.315472638330695
Growth_Hormone_Signaling	EIF2_Signaling	0.315473653229408
HIF1__Signaling	P2Y_Purigenic_Receptor_Signaling_Pathway	0.31551978537894
Bladder_Cancer_Signaling	P2Y_Purigenic_Receptor_Signaling_Pathway	0.31551978537894
Eicosanoid_Signaling	P2Y_Purigenic_Receptor_Signaling_Pathway	0.315687458081824
Ethanol_Degradation_II	P2Y_Purigenic_Receptor_Signaling_Pathway	0.315687458081824
P2Y_Purigenic_Receptor_Signaling_Pathway	Noradrenaline_and_Adrenaline_Degradation	0.315687458081824
P2Y_Purigenic_Receptor_Signaling_Pathway	Role_of_JAK2_in_Hormone-like_Cytokine_Signaling	0.315687458081824
P2Y_Purigenic_Receptor_Signaling_Pathway	Triacylglycerol_Degradation	0.315687458081824
P2Y_Purigenic_Receptor_Signaling_Pathway	Human_Embryonic_Stem_Cell_Pluripotency	0.315687458081824
P2Y_Purigenic_Receptor_Signaling_Pathway	p38_MAPK_Signaling	0.315687458081824
P2Y_Purigenic_Receptor_Signaling_Pathway	Fatty_Acid__-oxidation	0.315747820254863
P2Y_Purigenic_Receptor_Signaling_Pathway	Histamine_Degradation	0.315747820254863
P2Y_Purigenic_Receptor_Signaling_Pathway	Granzyme_A_Signaling	0.315801475519785
Cell_Cycle_Control_of_Chromosomal_Replication	HMGB1_Signaling	0.315818211342508
P2Y_Purigenic_Receptor_Signaling_Pathway	CDK5_Signaling	0.315969148222669
P2Y_Purigenic_Receptor_Signaling_Pathway	CD28_Signaling_in_T_Helper_Cells	0.316049631120054
P2Y_Purigenic_Receptor_Signaling_Pathway	Antioxidant_Action_of_Vitamin_C	0.316049631120054
Growth_Hormone_Signaling	Retinoate_Biosynthesis_I	0.316286289163553
P2Y_Purigenic_Receptor_Signaling_Pathway	Colorectal_Cancer_Metastasis_Signaling	0.316338028169014
P2Y_Purigenic_Receptor_Signaling_Pathway	Sertoli_Cell-Sertoli_Cell_Junction_Signaling	0.316338028169014
P2Y_Purigenic_Receptor_Signaling_Pathway	Thrombin_Signaling	0.316338028169014
Mitotic_Roles_of_Polo-Like_Kinase	Retinoate_Biosynthesis_I	0.316354570502036
Mitotic_Roles_of_Polo-Like_Kinase	Tryptophan_Degradation_X_(Mammalian,_via_Tryptamine)	0.316511837709994
Wnt/_-catenin_Signaling	Growth_Hormone_Signaling	0.316613427979888
Coagulation_System	P2Y_Purigenic_Receptor_Signaling_Pathway	0.316625258799172
P2Y_Purigenic_Receptor_Signaling_Pathway	IL-8_Signaling	0.316639839034205
Role_of_BRCA1_in_DNA_Damage_Response	Tight_Junction_Signaling	0.316700158324199
Growth_Hormone_Signaling	Cell_Cycle:_G2/M_DNA_Damage_Checkpoint_Regulation	0.316749065823512
Growth_Hormone_Signaling	Tryptophan_Degradation_X_(Mammalian,_via_Tryptamine)	0.316789307272205
Growth_Hormone_Signaling	Basal_Cell_Carcinoma_Signaling	0.316863083261474
Growth_Hormone_Signaling	Putrescine_Degradation_III	0.316950273066973
Growth_Hormone_Signaling	Oxidative_Ethanol_Degradation_III	0.316950273066973
Growth_Hormone_Signaling	Ethanol_Degradation_IV	0.316950273066973
P2Y_Purigenic_Receptor_Signaling_Pathway	Thyroid_Cancer_Signaling	0.316968477531858
P2Y_Purigenic_Receptor_Signaling_Pathway	Dendritic_Cell_Maturation	0.317035546613011
Growth_Hormone_Signaling	Axonal_Guidance_Signaling	0.31704608604005
Regulation_of_the_Epithelial-Mesenchymal_Transition_Pathway	Retinoate_Biosynthesis_I	0.317083133722973
Cellular_Effects_of_Sildenafil_(Viagra)	Regulation_of_the_Epithelial-Mesenchymal_Transition_Pathway	0.317106128836511
P2Y_Purigenic_Receptor_Signaling_Pathway	Estrogen_Receptor_Signaling	0.317129054520359
Cell_Cycle_Control_of_Chromosomal_Replication	Acute_Phase_Response_Signaling	0.317166269492872
Growth_Hormone_Signaling	Germ_Cell-Sertoli_Cell_Junction_Signaling	0.317195554278049
Epithelial_Adherens_Junction_Signaling	Retinoate_Biosynthesis_I	0.317214237807799
Growth_Hormone_Signaling	Triacylglycerol_Biosynthesis	0.317225256299703
P2Y_Purigenic_Receptor_Signaling_Pathway	Estrogen-Dependent_Breast_Cancer_Signaling	0.317344064386318
Growth_Hormone_Signaling	Prolactin_Signaling	0.317404905624222
_-linolenate_Biosynthesis_II_(Animals)	P2Y_Purigenic_Receptor_Signaling_Pathway	0.317417840375587
P2Y_Purigenic_Receptor_Signaling_Pathway	FXR/RXR_Activation	0.317417840375587
Wnt/_-catenin_Signaling	Epithelial_Adherens_Junction_Signaling	0.317474613033619
tRNA_Charging	P2Y_Purigenic_Receptor_Signaling_Pathway	0.317537313432836
Growth_Hormone_Signaling	Nitric_Oxide_Signaling_in_the_Cardiovascular_System	0.317574015521702
Growth_Hormone_Signaling	Assembly_of_RNA_Polymerase_II_Complex	0.317659469584935
Cell_Cycle:_G2/M_DNA_Damage_Checkpoint_Regulation	Regulation_of_the_Epithelial-Mesenchymal_Transition_Pathway	0.317662802210086
Salvage_Pathways_of_Pyrimidine_Deoxyribonucleotides	P2Y_Purigenic_Receptor_Signaling_Pathway	0.317666997354497
Growth_Hormone_Signaling	Ephrin_Receptor_Signaling	0.317688032959663
P2Y_Purigenic_Receptor_Signaling_Pathway	Role_of_Macrophages,_Fibroblasts_and_Endothelial_Cells_in_Rheumatoid_Arthritis	0.317699530516432
Epithelial_Adherens_Junction_Signaling	Tryptophan_Degradation_X_(Mammalian,_via_Tryptamine)	0.317760371754336
Epithelial_Adherens_Junction_Signaling	Basal_Cell_Carcinoma_Signaling	0.317814027019258
Cell_Cycle_Control_of_Chromosomal_Replication	Estrogen_Receptor_Signaling	0.317867552569045
Epithelial_Adherens_Junction_Signaling	Putrescine_Degradation_III	0.317901216824758
Epithelial_Adherens_Junction_Signaling	Oxidative_Ethanol_Degradation_III	0.317901216824758
Epithelial_Adherens_Junction_Signaling	Ethanol_Degradation_IV	0.317901216824758
Mitotic_Roles_of_Polo-Like_Kinase	Basal_Cell_Carcinoma_Signaling	0.317932119084193
Epithelial_Adherens_Junction_Signaling	Triacylglycerol_Biosynthesis	0.317968285905912
Epithelial_Adherens_Junction_Signaling	Germ_Cell-Sertoli_Cell_Junction_Signaling	0.318025773689758
Mitotic_Roles_of_Polo-Like_Kinase	Putrescine_Degradation_III	0.318043059517714
Mitotic_Roles_of_Polo-Like_Kinase	Oxidative_Ethanol_Degradation_III	0.318043059517714
Mitotic_Roles_of_Polo-Like_Kinase	Ethanol_Degradation_IV	0.318043059517714
Mitotic_Roles_of_Polo-Like_Kinase	Prolactin_Signaling	0.318127179187087
Growth_Hormone_Signaling	Estrogen-mediated_S-phase_Entry	0.318166223010943
Epithelial_Adherens_Junction_Signaling	Axonal_Guidance_Signaling	0.318225064673757
Wnt/_-catenin_Signaling	Regulation_of_the_Epithelial-Mesenchymal_Transition_Pathway	0.31823687929278
Epithelial_Adherens_Junction_Signaling	Cell_Cycle:_G2/M_DNA_Damage_Checkpoint_Regulation	0.318246143527834
Growth_Hormone_Signaling	RhoA_Signaling	0.318258120149468
Tryptophan_Degradation_X_(Mammalian,_via_Tryptamine)	Regulation_of_the_Epithelial-Mesenchymal_Transition_Pathway	0.318259717032353
Cell_Cycle_Control_of_Chromosomal_Replication	Molecular_Mechanisms_of_Cancer	0.318285149880848
Growth_Hormone_Signaling	Role_of_Osteoblasts,_Osteoclasts_and_Chondrocytes_in_Rheumatoid_Arthritis	0.318291654690045
Mitotic_Roles_of_Polo-Like_Kinase	Axonal_Guidance_Signaling	0.318374052129812
Basal_Cell_Carcinoma_Signaling	Regulation_of_the_Epithelial-Mesenchymal_Transition_Pathway	0.318400562102775
Mitotic_Roles_of_Polo-Like_Kinase	Cellular_Effects_of_Sildenafil_(Viagra)	0.318401482456782
Regulation_of_the_Epithelial-Mesenchymal_Transition_Pathway	Germ_Cell-Sertoli_Cell_Junction_Signaling	0.318404394621698
Regulation_of_the_Epithelial-Mesenchymal_Transition_Pathway	Triacylglycerol_Biosynthesis	0.318434096643352
Acute_Phase_Response_Signaling	P2Y_Purigenic_Receptor_Signaling_Pathway	0.318474810213941
Putrescine_Degradation_III	Regulation_of_the_Epithelial-Mesenchymal_Transition_Pathway	0.318487751908275
Oxidative_Ethanol_Degradation_III	Regulation_of_the_Epithelial-Mesenchymal_Transition_Pathway	0.318487751908275
Ethanol_Degradation_IV	Regulation_of_the_Epithelial-Mesenchymal_Transition_Pathway	0.318487751908275
Role_of_BRCA1_in_DNA_Damage_Response	EIF2_Signaling	0.318507570373242
Epithelial_Adherens_Junction_Signaling	Prolactin_Signaling	0.318569512311967
Cellular_Effects_of_Sildenafil_(Viagra)	Tight_Junction_Signaling	0.318608795630928
Epithelial_Adherens_Junction_Signaling	Nitric_Oxide_Signaling_in_the_Cardiovascular_System	0.318659097441794
Epithelial_Adherens_Junction_Signaling	Ephrin_Receptor_Signaling	0.318806649420331
Cell_Cycle_Control_of_Chromosomal_Replication	LPS/IL-1_Mediated_Inhibition_of_RXR_Function	0.318814118440984
Growth_Hormone_Signaling	Calcium_Signaling	0.31884832806362
Growth_Hormone_Signaling	IL-6_Signaling	0.31884832806362
Growth_Hormone_Signaling	Factors_Promoting_Cardiogenesis_in_Vertebrates	0.318901983328543
Growth_Hormone_Signaling	Glioblastoma_Multiforme_Signaling	0.318901983328543
Growth_Hormone_Signaling	ILK_Signaling	0.318901983328543
Growth_Hormone_Signaling	Signaling_by_Rho_Family_GTPases	0.318901983328543
Growth_Hormone_Signaling	RAR_Activation	0.318901983328543
Growth_Hormone_Signaling	Integrin_Signaling	0.318901983328543
Growth_Hormone_Signaling	Agranulocyte_Adhesion_and_Diapedesis	0.318901983328543
Growth_Hormone_Signaling	Regulation_of_Actin-based_Motility_by_Rho	0.318901983328543
Epithelial_Adherens_Junction_Signaling	Role_of_Osteoblasts,_Osteoclasts_and_Chondrocytes_in_Rheumatoid_Arthritis	0.318934080674523
Mitotic_Roles_of_Polo-Like_Kinase	Nitric_Oxide_Signaling_in_the_Cardiovascular_System	0.319007387901397
Epithelial_Adherens_Junction_Signaling	RhoA_Signaling	0.319088339561177
EIF2_Signaling	Tight_Junction_Signaling	0.31910496082491
Mitotic_Roles_of_Polo-Like_Kinase	Ephrin_Receptor_Signaling	0.319152463852925
Regulation_of_the_Epithelial-Mesenchymal_Transition_Pathway	Axonal_Guidance_Signaling	0.319199163233368
Tight_Junction_Signaling	Cell_Cycle:_G2/M_DNA_Damage_Checkpoint_Regulation	0.319225831177541
Growth_Hormone_Signaling	Eicosanoid_Signaling	0.319284277091118
Growth_Hormone_Signaling	Ethanol_Degradation_II	0.319284277091118
Growth_Hormone_Signaling	Noradrenaline_and_Adrenaline_Degradation	0.319284277091118
Growth_Hormone_Signaling	Role_of_JAK2_in_Hormone-like_Cytokine_Signaling	0.319284277091118
Growth_Hormone_Signaling	Triacylglycerol_Degradation	0.319284277091118
Growth_Hormone_Signaling	Human_Embryonic_Stem_Cell_Pluripotency	0.319284277091118
Growth_Hormone_Signaling	p38_MAPK_Signaling	0.319284277091118
Role_of_BRCA1_in_DNA_Damage_Response	Cell_Cycle:_G2/M_DNA_Damage_Checkpoint_Regulation	0.319324686396298
Growth_Hormone_Signaling	CDK5_Signaling	0.319344639264156
Regulation_of_the_Epithelial-Mesenchymal_Transition_Pathway	Prolactin_Signaling	0.319363003417329
Regulation_of_the_Epithelial-Mesenchymal_Transition_Pathway	Nitric_Oxide_Signaling_in_the_Cardiovascular_System	0.319422886525502
Basal_Cell_Carcinoma_Signaling	Tight_Junction_Signaling	0.319433745329118
Growth_Hormone_Signaling	Granzyme_A_Signaling	0.319445242885887
RhoA_Signaling	Regulation_of_the_Epithelial-Mesenchymal_Transition_Pathway	0.319466960493117
Regulation_of_the_Epithelial-Mesenchymal_Transition_Pathway	Role_of_Osteoblasts,_Osteoclasts_and_Chondrocytes_in_Rheumatoid_Arthritis	0.319500495033694
Ephrin_Receptor_Signaling	Regulation_of_the_Epithelial-Mesenchymal_Transition_Pathway	0.319536903963463
Tight_Junction_Signaling	Retinoate_Biosynthesis_I	0.319554469675194
Mitotic_Roles_of_Polo-Like_Kinase	Role_of_Osteoblasts,_Osteoclasts_and_Chondrocytes_in_Rheumatoid_Arthritis	0.319604759466511
Growth_Hormone_Signaling	Fatty_Acid__-oxidation	0.319619622496886
Growth_Hormone_Signaling	Histamine_Degradation	0.319619622496886
Growth_Hormone_Signaling	tRNA_Charging	0.319653831681927
Estrogen-mediated_S-phase_Entry	Regulation_of_the_Epithelial-Mesenchymal_Transition_Pathway	0.319675309737422
Wnt/_-catenin_Signaling	Tight_Junction_Signaling	0.319700285911466
Growth_Hormone_Signaling	Colorectal_Cancer_Metastasis_Signaling	0.319713519210501
Growth_Hormone_Signaling	Sertoli_Cell-Sertoli_Cell_Junction_Signaling	0.319713519210501
Growth_Hormone_Signaling	Thrombin_Signaling	0.319713519210501
Growth_Hormone_Signaling	CD28_Signaling_in_T_Helper_Cells	0.319720226118617
Growth_Hormone_Signaling	Antioxidant_Action_of_Vitamin_C	0.319720226118617
Epithelial_Adherens_Junction_Signaling	Factors_Promoting_Cardiogenesis_in_Vertebrates	0.319732202740251
Epithelial_Adherens_Junction_Signaling	Glioblastoma_Multiforme_Signaling	0.319732202740251
Epithelial_Adherens_Junction_Signaling	ILK_Signaling	0.319732202740251
Epithelial_Adherens_Junction_Signaling	Signaling_by_Rho_Family_GTPases	0.319732202740251
Epithelial_Adherens_Junction_Signaling	RAR_Activation	0.319732202740251
Epithelial_Adherens_Junction_Signaling	Integrin_Signaling	0.319732202740251
Epithelial_Adherens_Junction_Signaling	Agranulocyte_Adhesion_and_Diapedesis	0.319732202740251
Epithelial_Adherens_Junction_Signaling	Regulation_of_Actin-based_Motility_by_Rho	0.319732202740251
Role_of_BRCA1_in_DNA_Damage_Response	Cellular_Effects_of_Sildenafil_(Viagra)	0.319743839564811
Epithelial_Adherens_Junction_Signaling	EIF2_Signaling	0.319930073478667
Wnt/_-catenin_Signaling	Role_of_BRCA1_in_DNA_Damage_Response	0.319952757222292
Tight_Junction_Signaling	Tryptophan_Degradation_X_(Mammalian,_via_Tryptamine)	0.319956884162116
Epithelial_Adherens_Junction_Signaling	Calcium_Signaling	0.319966944524289
Epithelial_Adherens_Junction_Signaling	IL-6_Signaling	0.319966944524289
Putrescine_Degradation_III	Tight_Junction_Signaling	0.319990418702692
Oxidative_Ethanol_Degradation_III	Tight_Junction_Signaling	0.319990418702692
Tight_Junction_Signaling	Ethanol_Degradation_IV	0.319990418702692
Tight_Junction_Signaling	Germ_Cell-Sertoli_Cell_Junction_Signaling	0.320000958129731
Growth_Hormone_Signaling	IL-8_Signaling	0.320015330075692
Tight_Junction_Signaling	Axonal_Guidance_Signaling	0.320026348567596
Mitotic_Roles_of_Polo-Like_Kinase	Estrogen-mediated_S-phase_Entry	0.320036010173504
Epithelial_Adherens_Junction_Signaling	HIF1__Signaling	0.320110663983903
Epithelial_Adherens_Junction_Signaling	Bladder_Cancer_Signaling	0.320110663983903
Factors_Promoting_Cardiogenesis_in_Vertebrates	Regulation_of_the_Epithelial-Mesenchymal_Transition_Pathway	0.320110823672192
Glioblastoma_Multiforme_Signaling	Regulation_of_the_Epithelial-Mesenchymal_Transition_Pathway	0.320110823672192
ILK_Signaling	Regulation_of_the_Epithelial-Mesenchymal_Transition_Pathway	0.320110823672192
Regulation_of_the_Epithelial-Mesenchymal_Transition_Pathway	Signaling_by_Rho_Family_GTPases	0.320110823672192
Regulation_of_the_Epithelial-Mesenchymal_Transition_Pathway	RAR_Activation	0.320110823672192
Regulation_of_the_Epithelial-Mesenchymal_Transition_Pathway	Integrin_Signaling	0.320110823672192
Regulation_of_the_Epithelial-Mesenchymal_Transition_Pathway	Agranulocyte_Adhesion_and_Diapedesis	0.320110823672192
Regulation_of_the_Epithelial-Mesenchymal_Transition_Pathway	Regulation_of_Actin-based_Motility_by_Rho	0.320110823672192
Tight_Junction_Signaling	Triacylglycerol_Biosynthesis	0.320131263773115
Epithelial_Adherens_Junction_Signaling	Eicosanoid_Signaling	0.320201686308326
Epithelial_Adherens_Junction_Signaling	Ethanol_Degradation_II	0.320201686308326
Epithelial_Adherens_Junction_Signaling	Noradrenaline_and_Adrenaline_Degradation	0.320201686308326
Epithelial_Adherens_Junction_Signaling	Role_of_JAK2_in_Hormone-like_Cytokine_Signaling	0.320201686308326
Epithelial_Adherens_Junction_Signaling	Triacylglycerol_Degradation	0.320201686308326
Epithelial_Adherens_Junction_Signaling	Human_Embryonic_Stem_Cell_Pluripotency	0.320201686308326
Epithelial_Adherens_Junction_Signaling	p38_MAPK_Signaling	0.320201686308326
LPS/IL-1_Mediated_Inhibition_of_RXR_Function	P2Y_Purigenic_Receptor_Signaling_Pathway	0.320237080339382
Epithelial_Adherens_Junction_Signaling	Fatty_Acid__-oxidation	0.320262048481364
Epithelial_Adherens_Junction_Signaling	Histamine_Degradation	0.320262048481364
Epithelial_Adherens_Junction_Signaling	Assembly_of_RNA_Polymerase_II_Complex	0.320306615399783
Epithelial_Adherens_Junction_Signaling	Granzyme_A_Signaling	0.320349238286864
Role_of_BRCA1_in_DNA_Damage_Response	Prolactin_Signaling	0.32035227134332
Role_of_BRCA1_in_DNA_Damage_Response	Germ_Cell-Sertoli_Cell_Junction_Signaling	0.32038018105793
Epithelial_Adherens_Junction_Signaling	CDK5_Signaling	0.320523617897863
Role_of_BRCA1_in_DNA_Damage_Response	Triacylglycerol_Biosynthesis	0.320539520155888
Wnt/_-catenin_Signaling	Triacylglycerol_Biosynthesis	0.320542245883861
Mitotic_Roles_of_Polo-Like_Kinase	Wnt/_-catenin_Signaling	0.320547203545617
Growth_Hormone_Signaling	Thyroid_Cancer_Signaling	0.320581584746575
Tight_Junction_Signaling	Prolactin_Signaling	0.320625179649325
Mitotic_Roles_of_Polo-Like_Kinase	Calcium_Signaling	0.320628825006705
Mitotic_Roles_of_Polo-Like_Kinase	IL-6_Signaling	0.320628825006705
Mitotic_Roles_of_Polo-Like_Kinase	Assembly_of_RNA_Polymerase_II_Complex	0.320665558661328
Growth_Hormone_Signaling	Coagulation_System	0.320669427191166
Calcium_Signaling	Regulation_of_the_Epithelial-Mesenchymal_Transition_Pathway	0.32069719906742
Regulation_of_the_Epithelial-Mesenchymal_Transition_Pathway	IL-6_Signaling	0.32069719906742
Role_of_BRCA1_in_DNA_Damage_Response	Axonal_Guidance_Signaling	0.320697844355133
Mitotic_Roles_of_Polo-Like_Kinase	Factors_Promoting_Cardiogenesis_in_Vertebrates	0.320703420256992
Mitotic_Roles_of_Polo-Like_Kinase	Glioblastoma_Multiforme_Signaling	0.320703420256992
Mitotic_Roles_of_Polo-Like_Kinase	ILK_Signaling	0.320703420256992
Mitotic_Roles_of_Polo-Like_Kinase	Signaling_by_Rho_Family_GTPases	0.320703420256992
Mitotic_Roles_of_Polo-Like_Kinase	RAR_Activation	0.320703420256992
Mitotic_Roles_of_Polo-Like_Kinase	Integrin_Signaling	0.320703420256992
Mitotic_Roles_of_Polo-Like_Kinase	Agranulocyte_Adhesion_and_Diapedesis	0.320703420256992
Mitotic_Roles_of_Polo-Like_Kinase	Regulation_of_Actin-based_Motility_by_Rho	0.320703420256992
Epithelial_Adherens_Junction_Signaling	tRNA_Charging	0.320706342238388
Tight_Junction_Signaling	Nitric_Oxide_Signaling_in_the_Cardiovascular_System	0.320748299319728
Regulation_of_the_Epithelial-Mesenchymal_Transition_Pathway	Eicosanoid_Signaling	0.320790137651305
Regulation_of_the_Epithelial-Mesenchymal_Transition_Pathway	Ethanol_Degradation_II	0.320790137651305
Regulation_of_the_Epithelial-Mesenchymal_Transition_Pathway	Noradrenaline_and_Adrenaline_Degradation	0.320790137651305
Regulation_of_the_Epithelial-Mesenchymal_Transition_Pathway	Role_of_JAK2_in_Hormone-like_Cytokine_Signaling	0.320790137651305
Regulation_of_the_Epithelial-Mesenchymal_Transition_Pathway	Triacylglycerol_Degradation	0.320790137651305
Regulation_of_the_Epithelial-Mesenchymal_Transition_Pathway	Human_Embryonic_Stem_Cell_Pluripotency	0.320790137651305
Regulation_of_the_Epithelial-Mesenchymal_Transition_Pathway	p38_MAPK_Signaling	0.320790137651305
Growth_Hormone_Signaling	Estrogen_Receptor_Signaling	0.320798580301686
Growth_Hormone_Signaling	Dendritic_Cell_Maturation	0.320811535881958
Regulation_of_the_Epithelial-Mesenchymal_Transition_Pathway	CDK5_Signaling	0.320817923413497
Regulation_of_the_Epithelial-Mesenchymal_Transition_Pathway	Fatty_Acid__-oxidation	0.320828462840535
Regulation_of_the_Epithelial-Mesenchymal_Transition_Pathway	Histamine_Degradation	0.320828462840535
Tight_Junction_Signaling	Ephrin_Receptor_Signaling	0.320862316757689
Epithelial_Adherens_Junction_Signaling	Colorectal_Cancer_Metastasis_Signaling	0.320892497844208
Epithelial_Adherens_Junction_Signaling	Sertoli_Cell-Sertoli_Cell_Junction_Signaling	0.320892497844208
Epithelial_Adherens_Junction_Signaling	Thrombin_Signaling	0.320892497844208
Regulation_of_the_Epithelial-Mesenchymal_Transition_Pathway	Granzyme_A_Signaling	0.320962601002842
Growth_Hormone_Signaling	Estrogen-Dependent_Breast_Cancer_Signaling	0.320983999233496
HIF1__Signaling	Regulation_of_the_Epithelial-Mesenchymal_Transition_Pathway	0.320985596116381
Regulation_of_the_Epithelial-Mesenchymal_Transition_Pathway	Bladder_Cancer_Signaling	0.320985596116381
Salvage_Pathways_of_Pyrimidine_Deoxyribonucleotides	Growth_Hormone_Signaling	0.32103410808768
RhoA_Signaling	Tight_Junction_Signaling	0.32106352400115
Growth_Hormone_Signaling	_-linolenate_Biosynthesis_II_(Animals)	0.321064482130881
Growth_Hormone_Signaling	FXR/RXR_Activation	0.321064482130881
Regulation_of_the_Epithelial-Mesenchymal_Transition_Pathway	CD28_Signaling_in_T_Helper_Cells	0.32109673916515
Regulation_of_the_Epithelial-Mesenchymal_Transition_Pathway	Antioxidant_Action_of_Vitamin_C	0.32109673916515
Epithelial_Adherens_Junction_Signaling	CD28_Signaling_in_T_Helper_Cells	0.321186643671553
Epithelial_Adherens_Junction_Signaling	Antioxidant_Action_of_Vitamin_C	0.321186643671553
Regulation_of_the_Epithelial-Mesenchymal_Transition_Pathway	Colorectal_Cancer_Metastasis_Signaling	0.321186803359842
Regulation_of_the_Epithelial-Mesenchymal_Transition_Pathway	Sertoli_Cell-Sertoli_Cell_Junction_Signaling	0.321186803359842
Regulation_of_the_Epithelial-Mesenchymal_Transition_Pathway	Thrombin_Signaling	0.321186803359842
Role_of_BRCA1_in_DNA_Damage_Response	Putrescine_Degradation_III	0.32119311492713
Role_of_BRCA1_in_DNA_Damage_Response	Oxidative_Ethanol_Degradation_III	0.32119311492713
Role_of_BRCA1_in_DNA_Damage_Response	Ethanol_Degradation_IV	0.32119311492713
Role_of_BRCA1_in_DNA_Damage_Response	Nitric_Oxide_Signaling_in_the_Cardiovascular_System	0.32119311492713
Tight_Junction_Signaling	Role_of_Osteoblasts,_Osteoclasts_and_Chondrocytes_in_Rheumatoid_Arthritis	0.321197662163457
Role_of_BRCA1_in_DNA_Damage_Response	Tryptophan_Degradation_X_(Mammalian,_via_Tryptamine)	0.321207323509114
tRNA_Charging	Regulation_of_the_Epithelial-Mesenchymal_Transition_Pathway	0.321245314046016
Mitotic_Roles_of_Polo-Like_Kinase	Eicosanoid_Signaling	0.321260332089825
Mitotic_Roles_of_Polo-Like_Kinase	Ethanol_Degradation_II	0.321260332089825
Mitotic_Roles_of_Polo-Like_Kinase	Noradrenaline_and_Adrenaline_Degradation	0.321260332089825
Mitotic_Roles_of_Polo-Like_Kinase	Role_of_JAK2_in_Hormone-like_Cytokine_Signaling	0.321260332089825
Mitotic_Roles_of_Polo-Like_Kinase	Triacylglycerol_Biosynthesis	0.321260332089825
Mitotic_Roles_of_Polo-Like_Kinase	Triacylglycerol_Degradation	0.321260332089825
Mitotic_Roles_of_Polo-Like_Kinase	Human_Embryonic_Stem_Cell_Pluripotency	0.321260332089825
Mitotic_Roles_of_Polo-Like_Kinase	p38_MAPK_Signaling	0.321260332089825
Mitotic_Roles_of_Polo-Like_Kinase	Fatty_Acid__-oxidation	0.321294467607832
Mitotic_Roles_of_Polo-Like_Kinase	Histamine_Degradation	0.321294467607832
Mitotic_Roles_of_Polo-Like_Kinase	CDK5_Signaling	0.321311535366835
Role_of_BRCA1_in_DNA_Damage_Response	Basal_Cell_Carcinoma_Signaling	0.32131388787399
Role_of_BRCA1_in_DNA_Damage_Response	Ephrin_Receptor_Signaling	0.32131388787399
Epithelial_Adherens_Junction_Signaling	Estrogen-mediated_S-phase_Entry	0.321320615202603
Epithelial_Adherens_Junction_Signaling	Coagulation_System	0.321448782411515
Regulation_of_the_Epithelial-Mesenchymal_Transition_Pathway	IL-8_Signaling	0.321488614225033
Mitotic_Roles_of_Polo-Like_Kinase	tRNA_Charging	0.321575195049771
Growth_Hormone_Signaling	HIF1__Signaling	0.321630736801763
Growth_Hormone_Signaling	Bladder_Cancer_Signaling	0.321630736801763
Growth_Hormone_Signaling	Role_of_Macrophages,_Fibroblasts_and_Endothelial_Cells_in_Rheumatoid_Arthritis	0.321630736801763
Role_of_BRCA1_in_DNA_Damage_Response	RhoA_Signaling	0.321633580968619
Epithelial_Adherens_Junction_Signaling	Dendritic_Cell_Maturation	0.32168295487209
Epithelial_Adherens_Junction_Signaling	Thyroid_Cancer_Signaling	0.321696847753186
Epithelial_Adherens_Junction_Signaling	Estrogen_Receptor_Signaling	0.321701173222912
Factors_Promoting_Cardiogenesis_in_Vertebrates	Tight_Junction_Signaling	0.321707387180224
Tight_Junction_Signaling	Glioblastoma_Multiforme_Signaling	0.321707387180224
Tight_Junction_Signaling	ILK_Signaling	0.321707387180224
Tight_Junction_Signaling	Signaling_by_Rho_Family_GTPases	0.321707387180224
Tight_Junction_Signaling	RAR_Activation	0.321707387180224
Tight_Junction_Signaling	Integrin_Signaling	0.321707387180224
Tight_Junction_Signaling	Agranulocyte_Adhesion_and_Diapedesis	0.321707387180224
Tight_Junction_Signaling	Regulation_of_Actin-based_Motility_by_Rho	0.321707387180224
Mitotic_Roles_of_Polo-Like_Kinase	HIF1__Signaling	0.321707751200839
Mitotic_Roles_of_Polo-Like_Kinase	Bladder_Cancer_Signaling	0.321707751200839
Epithelial_Adherens_Junction_Signaling	IL-8_Signaling	0.321719363801859
Coagulation_System	Regulation_of_the_Epithelial-Mesenchymal_Transition_Pathway	0.321745703112163
Cellular_Effects_of_Sildenafil_(Viagra)	Cell_Cycle:_G2/M_DNA_Damage_Checkpoint_Regulation	0.321767749353262
Epithelial_Adherens_Junction_Signaling	Salvage_Pathways_of_Pyrimidine_Deoxyribonucleotides	0.32176811696901
Mitotic_Roles_of_Polo-Like_Kinase	Colorectal_Cancer_Metastasis_Signaling	0.321780898739424
Mitotic_Roles_of_Polo-Like_Kinase	Sertoli_Cell-Sertoli_Cell_Junction_Signaling	0.321780898739424
Mitotic_Roles_of_Polo-Like_Kinase	Thrombin_Signaling	0.321780898739424
Epithelial_Adherens_Junction_Signaling	Estrogen-Dependent_Breast_Cancer_Signaling	0.321901408450704
EIF2_Signaling	Cellular_Effects_of_Sildenafil_(Viagra)	0.321939572930622
Epithelial_Adherens_Junction_Signaling	_-linolenate_Biosynthesis_II_(Animals)	0.321975184439973
Epithelial_Adherens_Junction_Signaling	FXR/RXR_Activation	0.321975184439973
Calcium_Signaling	Tight_Junction_Signaling	0.322022611861646
Tight_Junction_Signaling	IL-6_Signaling	0.322022611861646
Assembly_of_RNA_Polymerase_II_Complex	Tight_Junction_Signaling	0.322035886818496
Role_of_BRCA1_in_DNA_Damage_Response	Estrogen-mediated_S-phase_Entry	0.32203791964547
Cellular_Effects_of_Sildenafil_(Viagra)	Retinoate_Biosynthesis_I	0.322042732585992
Growth_Hormone_Signaling	HMGB1_Signaling	0.322063811440069
Regulation_of_the_Epithelial-Mesenchymal_Transition_Pathway	Dendritic_Cell_Maturation	0.322125770495992
Regulation_of_the_Epithelial-Mesenchymal_Transition_Pathway	Thyroid_Cancer_Signaling	0.32214876560953
Mitotic_Roles_of_Polo-Like_Kinase	IL-8_Signaling	0.322164923316997
Mitotic_Roles_of_Polo-Like_Kinase	Granzyme_A_Signaling	0.322241728232512
EIF2_Signaling	Retinoate_Biosynthesis_I	0.322255206430398
Epithelial_Adherens_Junction_Signaling	Role_of_Macrophages,_Fibroblasts_and_Endothelial_Cells_in_Rheumatoid_Arthritis	0.322256874580818
Regulation_of_the_Epithelial-Mesenchymal_Transition_Pathway	Estrogen_Receptor_Signaling	0.32225935784942
Tight_Junction_Signaling	HIF1__Signaling	0.322273641851107
Tight_Junction_Signaling	Bladder_Cancer_Signaling	0.322273641851107
Role_of_BRCA1_in_DNA_Damage_Response	Factors_Promoting_Cardiogenesis_in_Vertebrates	0.322315592903828
Role_of_BRCA1_in_DNA_Damage_Response	Glioblastoma_Multiforme_Signaling	0.322315592903828
Role_of_BRCA1_in_DNA_Damage_Response	ILK_Signaling	0.322315592903828
Role_of_BRCA1_in_DNA_Damage_Response	Signaling_by_Rho_Family_GTPases	0.322315592903828
Role_of_BRCA1_in_DNA_Damage_Response	RAR_Activation	0.322315592903828
Role_of_BRCA1_in_DNA_Damage_Response	Integrin_Signaling	0.322315592903828
Role_of_BRCA1_in_DNA_Damage_Response	Agranulocyte_Adhesion_and_Diapedesis	0.322315592903828
Role_of_BRCA1_in_DNA_Damage_Response	Regulation_of_Actin-based_Motility_by_Rho	0.322315592903828
Wnt/_-catenin_Signaling	Cellular_Effects_of_Sildenafil_(Viagra)	0.322315882874889
Mitotic_Roles_of_Polo-Like_Kinase	RhoA_Signaling	0.322327067027528
Mitotic_Roles_of_Polo-Like_Kinase	CD28_Signaling_in_T_Helper_Cells	0.322327067027528
Mitotic_Roles_of_Polo-Like_Kinase	Antioxidant_Action_of_Vitamin_C	0.322327067027528
Role_of_BRCA1_in_DNA_Damage_Response	Fatty_Acid__-oxidation	0.32237503697131
Role_of_BRCA1_in_DNA_Damage_Response	Histamine_Degradation	0.32237503697131
Basal_Cell_Carcinoma_Signaling	Cellular_Effects_of_Sildenafil_(Viagra)	0.322445147072914
Regulation_of_the_Epithelial-Mesenchymal_Transition_Pathway	Estrogen-Dependent_Breast_Cancer_Signaling	0.322457283382837
Estrogen-mediated_S-phase_Entry	Tight_Junction_Signaling	0.322460810411121
Cellular_Effects_of_Sildenafil_(Viagra)	Tryptophan_Degradation_X_(Mammalian,_via_Tryptamine)	0.322498802337837
Tight_Junction_Signaling	Granzyme_A_Signaling	0.322512216154067
Tight_Junction_Signaling	Fatty_Acid__-oxidation	0.322525629970298
Tight_Junction_Signaling	Histamine_Degradation	0.322525629970298
Cellular_Effects_of_Sildenafil_(Viagra)	Putrescine_Degradation_III	0.322532336878413
Cellular_Effects_of_Sildenafil_(Viagra)	Oxidative_Ethanol_Degradation_III	0.322532336878413
Cellular_Effects_of_Sildenafil_(Viagra)	Ethanol_Degradation_IV	0.322532336878413
Role_of_BRCA1_in_DNA_Damage_Response	Calcium_Signaling	0.322542930215565
Role_of_BRCA1_in_DNA_Damage_Response	IL-6_Signaling	0.322542930215565
Cell_Cycle:_G2/M_DNA_Damage_Checkpoint_Regulation	Retinoate_Biosynthesis_I	0.322572578327106
Cellular_Effects_of_Sildenafil_(Viagra)	Germ_Cell-Sertoli_Cell_Junction_Signaling	0.322643479927182
Cellular_Effects_of_Sildenafil_(Viagra)	Triacylglycerol_Biosynthesis	0.322673181948836
Tight_Junction_Signaling	CD28_Signaling_in_T_Helper_Cells	0.322726837213759
Tight_Junction_Signaling	Antioxidant_Action_of_Vitamin_C	0.322726837213759
Tight_Junction_Signaling	Eicosanoid_Signaling	0.322783366867874
Tight_Junction_Signaling	Ethanol_Degradation_II	0.322783366867874
Tight_Junction_Signaling	Noradrenaline_and_Adrenaline_Degradation	0.322783366867874
Tight_Junction_Signaling	Role_of_JAK2_in_Hormone-like_Cytokine_Signaling	0.322783366867874
Tight_Junction_Signaling	Triacylglycerol_Degradation	0.322783366867874
Tight_Junction_Signaling	Human_Embryonic_Stem_Cell_Pluripotency	0.322783366867874
Tight_Junction_Signaling	p38_MAPK_Signaling	0.322783366867874
Tight_Junction_Signaling	CDK5_Signaling	0.322814027019258
Role_of_BRCA1_in_DNA_Damage_Response	Assembly_of_RNA_Polymerase_II_Complex	0.322816589322296
Cellular_Effects_of_Sildenafil_(Viagra)	Axonal_Guidance_Signaling	0.322822650186835
Wnt/_-catenin_Signaling	Cell_Cycle:_G2/M_DNA_Damage_Checkpoint_Regulation	0.322916296953564
Mitotic_Roles_of_Polo-Like_Kinase	Thyroid_Cancer_Signaling	0.322962231487577
Epithelial_Adherens_Junction_Signaling	Acute_Phase_Response_Signaling	0.323046928916494
Role_of_BRCA1_in_DNA_Damage_Response	Eicosanoid_Signaling	0.323047334875979
Role_of_BRCA1_in_DNA_Damage_Response	Ethanol_Degradation_II	0.323047334875979
Role_of_BRCA1_in_DNA_Damage_Response	Role_of_Osteoblasts,_Osteoclasts_and_Chondrocytes_in_Rheumatoid_Arthritis	0.323047334875979
Role_of_BRCA1_in_DNA_Damage_Response	Noradrenaline_and_Adrenaline_Degradation	0.323047334875979
Role_of_BRCA1_in_DNA_Damage_Response	Role_of_JAK2_in_Hormone-like_Cytokine_Signaling	0.323047334875979
Role_of_BRCA1_in_DNA_Damage_Response	Triacylglycerol_Degradation	0.323047334875979
Role_of_BRCA1_in_DNA_Damage_Response	Human_Embryonic_Stem_Cell_Pluripotency	0.323047334875979
Role_of_BRCA1_in_DNA_Damage_Response	p38_MAPK_Signaling	0.323047334875979
Role_of_BRCA1_in_DNA_Damage_Response	Granzyme_A_Signaling	0.323054439166971
Basal_Cell_Carcinoma_Signaling	Cell_Cycle:_G2/M_DNA_Damage_Checkpoint_Regulation	0.323062182619527
Wnt/_-catenin_Signaling	Retinoate_Biosynthesis_I	0.323075027112294
Role_of_BRCA1_in_DNA_Damage_Response	CDK5_Signaling	0.323097064912922
Epithelial_Adherens_Junction_Signaling	HMGB1_Signaling	0.323113921624988
Putrescine_Degradation_III	Cell_Cycle:_G2/M_DNA_Damage_Checkpoint_Regulation	0.323149372425026
Oxidative_Ethanol_Degradation_III	Cell_Cycle:_G2/M_DNA_Damage_Checkpoint_Regulation	0.323149372425026
Ethanol_Degradation_IV	Cell_Cycle:_G2/M_DNA_Damage_Checkpoint_Regulation	0.323149372425026
Salvage_Pathways_of_Pyrimidine_Deoxyribonucleotides	Regulation_of_the_Epithelial-Mesenchymal_Transition_Pathway	0.323152478584026
Cellular_Effects_of_Sildenafil_(Viagra)	Prolactin_Signaling	0.323167097825045
EIF2_Signaling	Basal_Cell_Carcinoma_Signaling	0.323168615272196
Tight_Junction_Signaling	Colorectal_Cancer_Metastasis_Signaling	0.323182906965603
Tight_Junction_Signaling	Sertoli_Cell-Sertoli_Cell_Junction_Signaling	0.323182906965603
Tight_Junction_Signaling	Thrombin_Signaling	0.323182906965603
Retinoate_Biosynthesis_I	Germ_Cell-Sertoli_Cell_Junction_Signaling	0.32320398581968
Mitotic_Roles_of_Polo-Like_Kinase	_-linolenate_Biosynthesis_II_(Animals)	0.323218247872626
Mitotic_Roles_of_Polo-Like_Kinase	FXR/RXR_Activation	0.323218247872626
Wnt/_-catenin_Signaling	EIF2_Signaling	0.323231008821439
Cell_Cycle:_G2/M_DNA_Damage_Checkpoint_Regulation	Germ_Cell-Sertoli_Cell_Junction_Signaling	0.323260515473795
EIF2_Signaling	Putrescine_Degradation_III	0.323260971055089
EIF2_Signaling	Oxidative_Ethanol_Degradation_III	0.323260971055089
EIF2_Signaling	Ethanol_Degradation_IV	0.323260971055089
Role_of_BRCA1_in_DNA_Damage_Response	Retinoate_Biosynthesis_I	0.323263508301871
Cellular_Effects_of_Sildenafil_(Viagra)	Nitric_Oxide_Signaling_in_the_Cardiovascular_System	0.323290217495449
Cell_Cycle:_G2/M_DNA_Damage_Checkpoint_Regulation	Triacylglycerol_Biosynthesis	0.323290217495449
Role_of_BRCA1_in_DNA_Damage_Response	HIF1__Signaling	0.323313238338814
Role_of_BRCA1_in_DNA_Damage_Response	Bladder_Cancer_Signaling	0.323313238338814
Role_of_BRCA1_in_DNA_Damage_Response	CD28_Signaling_in_T_Helper_Cells	0.323317297933666
Role_of_BRCA1_in_DNA_Damage_Response	Antioxidant_Action_of_Vitamin_C	0.323317297933666
Regulation_of_the_Epithelial-Mesenchymal_Transition_Pathway	_-linolenate_Biosynthesis_II_(Animals)	0.32336271597841
Regulation_of_the_Epithelial-Mesenchymal_Transition_Pathway	FXR/RXR_Activation	0.32336271597841
Tight_Junction_Signaling	Coagulation_System	0.323367839889579
Basal_Cell_Carcinoma_Signaling	Retinoate_Biosynthesis_I	0.323390821117179
EIF2_Signaling	Tryptophan_Degradation_X_(Mammalian,_via_Tryptamine)	0.323403056874924
Cellular_Effects_of_Sildenafil_(Viagra)	Ephrin_Receptor_Signaling	0.32340423493341
Cell_Cycle:_G2/M_DNA_Damage_Checkpoint_Regulation	Axonal_Guidance_Signaling	0.323439685733448
Retinoate_Biosynthesis_I	Triacylglycerol_Biosynthesis	0.323464597106448
Putrescine_Degradation_III	Retinoate_Biosynthesis_I	0.323478010922679
Oxidative_Ethanol_Degradation_III	Retinoate_Biosynthesis_I	0.323478010922679
Ethanol_Degradation_IV	Retinoate_Biosynthesis_I	0.323478010922679
Tryptophan_Degradation_X_(Mammalian,_via_Tryptamine)	Retinoate_Biosynthesis_I	0.323478010922679
Tight_Junction_Signaling	IL-8_Signaling	0.323484717830794
EIF2_Signaling	Germ_Cell-Sertoli_Cell_Junction_Signaling	0.323485263670686
Role_of_BRCA1_in_DNA_Damage_Response	Colorectal_Cancer_Metastasis_Signaling	0.323487800917468
Role_of_BRCA1_in_DNA_Damage_Response	Sertoli_Cell-Sertoli_Cell_Junction_Signaling	0.323487800917468
Role_of_BRCA1_in_DNA_Damage_Response	Thrombin_Signaling	0.323487800917468
Mitotic_Roles_of_Polo-Like_Kinase	Germ_Cell-Sertoli_Cell_Junction_Signaling	0.323494989393607
Mitotic_Roles_of_Polo-Like_Kinase	Estrogen-Dependent_Breast_Cancer_Signaling	0.323494989393607
EIF2_Signaling	Cell_Cycle:_G2/M_DNA_Damage_Checkpoint_Regulation	0.3235096212398
EIF2_Signaling	Axonal_Guidance_Signaling	0.323568485365161
Retinoate_Biosynthesis_I	Prolactin_Signaling	0.323597298074159
Regulation_of_the_Epithelial-Mesenchymal_Transition_Pathway	HMGB1_Signaling	0.323607837501198
Mitotic_Roles_of_Polo-Like_Kinase	Role_of_Macrophages,_Fibroblasts_and_Endothelial_Cells_in_Rheumatoid_Arthritis	0.3236108063297
Retinoate_Biosynthesis_I	Axonal_Guidance_Signaling	0.323614065344448
EIF2_Signaling	Triacylglycerol_Biosynthesis	0.323644602768644
Wnt/_-catenin_Signaling	Basal_Cell_Carcinoma_Signaling	0.323647835945973
Tight_Junction_Signaling	Thyroid_Cancer_Signaling	0.323688799463447
Wnt/_-catenin_Signaling	Tryptophan_Degradation_X_(Mammalian,_via_Tryptamine)	0.323703046435966
Cellular_Effects_of_Sildenafil_(Viagra)	RhoA_Signaling	0.323706045798601
Tight_Junction_Signaling	Dendritic_Cell_Maturation	0.323735747820255
Wnt/_-catenin_Signaling	Putrescine_Degradation_III	0.323737552992211
Wnt/_-catenin_Signaling	Oxidative_Ethanol_Degradation_III	0.323737552992211
Wnt/_-catenin_Signaling	Ethanol_Degradation_IV	0.323737552992211
Cellular_Effects_of_Sildenafil_(Viagra)	Role_of_Osteoblasts,_Osteoclasts_and_Chondrocytes_in_Rheumatoid_Arthritis	0.323739580339178
Growth_Hormone_Signaling	LPS/IL-1_Mediated_Inhibition_of_RXR_Function	0.323755734177729
Cell_Cycle:_G2/M_DNA_Damage_Checkpoint_Regulation	Prolactin_Signaling	0.323784133371659
Role_of_BRCA1_in_DNA_Damage_Response	tRNA_Charging	0.323792873792874
Basal_Cell_Carcinoma_Signaling	Tryptophan_Degradation_X_(Mammalian,_via_Tryptamine)	0.323793235604101
Role_of_BRCA1_in_DNA_Damage_Response	IL-8_Signaling	0.323807494012098
Basal_Cell_Carcinoma_Signaling	Putrescine_Degradation_III	0.323826770144678
Basal_Cell_Carcinoma_Signaling	Oxidative_Ethanol_Degradation_III	0.323826770144678
Basal_Cell_Carcinoma_Signaling	Ethanol_Degradation_IV	0.323826770144678
Basal_Cell_Carcinoma_Signaling	Germ_Cell-Sertoli_Cell_Junction_Signaling	0.323837309571716
Mitotic_Roles_of_Polo-Like_Kinase	Dendritic_Cell_Maturation	0.323848535830103
Wnt/_-catenin_Signaling	Germ_Cell-Sertoli_Cell_Junction_Signaling	0.323851917578626
Regulation_of_the_Epithelial-Mesenchymal_Transition_Pathway	Role_of_Macrophages,_Fibroblasts_and_Endothelial_Cells_in_Rheumatoid_Arthritis	0.323855034971735
Basal_Cell_Carcinoma_Signaling	Triacylglycerol_Biosynthesis	0.32386701159337
Putrescine_Degradation_III	Tryptophan_Degradation_X_(Mammalian,_via_Tryptamine)	0.3238804254096
Oxidative_Ethanol_Degradation_III	Tryptophan_Degradation_X_(Mammalian,_via_Tryptamine)	0.3238804254096
Ethanol_Degradation_IV	Tryptophan_Degradation_X_(Mammalian,_via_Tryptamine)	0.3238804254096
Tryptophan_Degradation_X_(Mammalian,_via_Tryptamine)	Germ_Cell-Sertoli_Cell_Junction_Signaling	0.323890964836639
Cell_Cycle:_G2/M_DNA_Damage_Checkpoint_Regulation	Nitric_Oxide_Signaling_in_the_Cardiovascular_System	0.323907253042062
Cellular_Effects_of_Sildenafil_(Viagra)	Estrogen-mediated_S-phase_Entry	0.32391008577344
Putrescine_Degradation_III	Oxidative_Ethanol_Degradation_III	0.323913959950177
Putrescine_Degradation_III	Ethanol_Degradation_IV	0.323913959950177
Oxidative_Ethanol_Degradation_III	Ethanol_Degradation_IV	0.323913959950177
Putrescine_Degradation_III	Germ_Cell-Sertoli_Cell_Junction_Signaling	0.323924499377216
Oxidative_Ethanol_Degradation_III	Germ_Cell-Sertoli_Cell_Junction_Signaling	0.323924499377216
Ethanol_Degradation_IV	Germ_Cell-Sertoli_Cell_Junction_Signaling	0.323924499377216
Tight_Junction_Signaling	Estrogen_Receptor_Signaling	0.323926846100759
EIF2_Signaling	Prolactin_Signaling	0.323933341452523
Role_of_BRCA1_in_DNA_Damage_Response	Coagulation_System	0.324009155901166
Cell_Cycle:_G2/M_DNA_Damage_Checkpoint_Regulation	Ephrin_Receptor_Signaling	0.324021270480023
Tryptophan_Degradation_X_(Mammalian,_via_Tryptamine)	Triacylglycerol_Biosynthesis	0.324021270480023
Putrescine_Degradation_III	Triacylglycerol_Biosynthesis	0.3240548050206
Oxidative_Ethanol_Degradation_III	Triacylglycerol_Biosynthesis	0.3240548050206
Ethanol_Degradation_IV	Triacylglycerol_Biosynthesis	0.3240548050206
EIF2_Signaling	Nitric_Oxide_Signaling_in_the_Cardiovascular_System	0.324063755937157
Tight_Junction_Signaling	Estrogen-Dependent_Breast_Cancer_Signaling	0.324064386317907
Tryptophan_Degradation_X_(Mammalian,_via_Tryptamine)	Axonal_Guidance_Signaling	0.324070135096292
Retinoate_Biosynthesis_I	Nitric_Oxide_Signaling_in_the_Cardiovascular_System	0.324081632653061
Mitotic_Roles_of_Polo-Like_Kinase	EIF2_Signaling	0.324085956416465
Basal_Cell_Carcinoma_Signaling	Axonal_Guidance_Signaling	0.3241170834531
Tight_Junction_Signaling	_-linolenate_Biosynthesis_II_(Animals)	0.324138162307176
Tight_Junction_Signaling	FXR/RXR_Activation	0.324138162307176
Wnt/_-catenin_Signaling	Axonal_Guidance_Signaling	0.324149659863946
EIF2_Signaling	Ephrin_Receptor_Signaling	0.324184528884017
Ephrin_Receptor_Signaling	Retinoate_Biosynthesis_I	0.324195650091022
Axonal_Guidance_Signaling	Germ_Cell-Sertoli_Cell_Junction_Signaling	0.324214812685638
Axonal_Guidance_Signaling	Triacylglycerol_Biosynthesis	0.324244514707291
Triacylglycerol_Biosynthesis	Germ_Cell-Sertoli_Cell_Junction_Signaling	0.324253137874868
Putrescine_Degradation_III	Axonal_Guidance_Signaling	0.324271342339753
Oxidative_Ethanol_Degradation_III	Axonal_Guidance_Signaling	0.324271342339753
Ethanol_Degradation_IV	Axonal_Guidance_Signaling	0.324271342339753
Growth_Hormone_Signaling	Molecular_Mechanisms_of_Cancer	0.324276841171251
Cellular_Effects_of_Sildenafil_(Viagra)	Factors_Promoting_Cardiogenesis_in_Vertebrates	0.324349908977676
Cellular_Effects_of_Sildenafil_(Viagra)	Glioblastoma_Multiforme_Signaling	0.324349908977676
Cellular_Effects_of_Sildenafil_(Viagra)	ILK_Signaling	0.324349908977676
Cellular_Effects_of_Sildenafil_(Viagra)	Signaling_by_Rho_Family_GTPases	0.324349908977676
Cellular_Effects_of_Sildenafil_(Viagra)	RAR_Activation	0.324349908977676
Cellular_Effects_of_Sildenafil_(Viagra)	Integrin_Signaling	0.324349908977676
Cellular_Effects_of_Sildenafil_(Viagra)	Agranulocyte_Adhesion_and_Diapedesis	0.324349908977676
Cellular_Effects_of_Sildenafil_(Viagra)	Regulation_of_Actin-based_Motility_by_Rho	0.324349908977676
Cell_Cycle:_G2/M_DNA_Damage_Checkpoint_Regulation	Tryptophan_Degradation_X_(Mammalian,_via_Tryptamine)	0.324356615885791
Cell_Cycle:_G2/M_DNA_Damage_Checkpoint_Regulation	Role_of_Osteoblasts,_Osteoclasts_and_Chondrocytes_in_Rheumatoid_Arthritis	0.324356615885791
Wnt/_-catenin_Signaling	Prolactin_Signaling	0.324390712806862
Role_of_BRCA1_in_DNA_Damage_Response	Dendritic_Cell_Maturation	0.324407299151545
Mitotic_Roles_of_Polo-Like_Kinase	HMGB1_Signaling	0.32440811450028
Tryptophan_Degradation_X_(Mammalian,_via_Tryptamine)	Prolactin_Signaling	0.324414582734502
Tight_Junction_Signaling	Role_of_Macrophages,_Fibroblasts_and_Endothelial_Cells_in_Rheumatoid_Arthritis	0.324419852448021
RhoA_Signaling	Cell_Cycle:_G2/M_DNA_Damage_Checkpoint_Regulation	0.324423684966945
Mitotic_Roles_of_Polo-Like_Kinase	Acute_Phase_Response_Signaling	0.324437813200373
Basal_Cell_Carcinoma_Signaling	Prolactin_Signaling	0.32446153109131
EIF2_Signaling	Role_of_Osteoblasts,_Osteoclasts_and_Chondrocytes_in_Rheumatoid_Arthritis	0.324461596232696
Germ_Cell-Sertoli_Cell_Junction_Signaling	Prolactin_Signaling	0.324462489221041
Wnt/_-catenin_Signaling	Nitric_Oxide_Signaling_in_the_Cardiovascular_System	0.324517401163364
RhoA_Signaling	Retinoate_Biosynthesis_I	0.32453099549679
Putrescine_Degradation_III	Prolactin_Signaling	0.324548720896809
Oxidative_Ethanol_Degradation_III	Prolactin_Signaling	0.324548720896809
Ethanol_Degradation_IV	Prolactin_Signaling	0.324548720896809
Role_of_BRCA1_in_DNA_Damage_Response	Thyroid_Cancer_Signaling	0.324556489262372
Cellular_Effects_of_Sildenafil_(Viagra)	Calcium_Signaling	0.324564530037367
Cellular_Effects_of_Sildenafil_(Viagra)	IL-6_Signaling	0.324564530037367
Basal_Cell_Carcinoma_Signaling	Nitric_Oxide_Signaling_in_the_Cardiovascular_System	0.324584650761713
Triacylglycerol_Biosynthesis	Prolactin_Signaling	0.324588962345502
Epithelial_Adherens_Junction_Signaling	LPS/IL-1_Mediated_Inhibition_of_RXR_Function	0.324598607558966
Wnt/_-catenin_Signaling	Ephrin_Receptor_Signaling	0.324634723454599
Tryptophan_Degradation_X_(Mammalian,_via_Tryptamine)	Nitric_Oxide_Signaling_in_the_Cardiovascular_System	0.324638306026636
Assembly_of_RNA_Polymerase_II_Complex	Cellular_Effects_of_Sildenafil_(Viagra)	0.324651483781919
Tryptophan_Degradation_X_(Mammalian,_via_Tryptamine)	Ephrin_Receptor_Signaling	0.324651719842867
Putrescine_Degradation_III	Nitric_Oxide_Signaling_in_the_Cardiovascular_System	0.324671840567213
Oxidative_Ethanol_Degradation_III	Nitric_Oxide_Signaling_in_the_Cardiovascular_System	0.324671840567213
Ethanol_Degradation_IV	Nitric_Oxide_Signaling_in_the_Cardiovascular_System	0.324671840567213
Role_of_BRCA1_in_DNA_Damage_Response	Estrogen_Receptor_Signaling	0.324682260964087
Nitric_Oxide_Signaling_in_the_Cardiovascular_System	Germ_Cell-Sertoli_Cell_Junction_Signaling	0.324682379994251
Basal_Cell_Carcinoma_Signaling	Ephrin_Receptor_Signaling	0.324698668199674
Estrogen-mediated_S-phase_Entry	Cell_Cycle:_G2/M_DNA_Damage_Checkpoint_Regulation	0.324717539189589
Putrescine_Degradation_III	Ephrin_Receptor_Signaling	0.324785858005174
Oxidative_Ethanol_Degradation_III	Ephrin_Receptor_Signaling	0.324785858005174
Ethanol_Degradation_IV	Ephrin_Receptor_Signaling	0.324785858005174
Ephrin_Receptor_Signaling	Germ_Cell-Sertoli_Cell_Junction_Signaling	0.324796397432212
Retinoate_Biosynthesis_I	Role_of_Osteoblasts,_Osteoclasts_and_Chondrocytes_in_Rheumatoid_Arthritis	0.32480597872952
Nitric_Oxide_Signaling_in_the_Cardiovascular_System	Triacylglycerol_Biosynthesis	0.324812685637635
Cellular_Effects_of_Sildenafil_(Viagra)	HIF1__Signaling	0.324815560026828
Cellular_Effects_of_Sildenafil_(Viagra)	Bladder_Cancer_Signaling	0.324815560026828
Ephrin_Receptor_Signaling	Triacylglycerol_Biosynthesis	0.324826099453866
Role_of_BRCA1_in_DNA_Damage_Response	_-linolenate_Biosynthesis_II_(Animals)	0.324826452320058
Role_of_BRCA1_in_DNA_Damage_Response	FXR/RXR_Activation	0.324826452320058
Estrogen-mediated_S-phase_Entry	Retinoate_Biosynthesis_I	0.324827960169575
Role_of_BRCA1_in_DNA_Damage_Response	Estrogen-Dependent_Breast_Cancer_Signaling	0.324883286647992
Basal_Cell_Carcinoma_Signaling	RhoA_Signaling	0.324899875443135
Cellular_Effects_of_Sildenafil_(Viagra)	Eicosanoid_Signaling	0.32490658235125
Cellular_Effects_of_Sildenafil_(Viagra)	Ethanol_Degradation_II	0.32490658235125
Cellular_Effects_of_Sildenafil_(Viagra)	Noradrenaline_and_Adrenaline_Degradation	0.32490658235125
Cellular_Effects_of_Sildenafil_(Viagra)	Role_of_JAK2_in_Hormone-like_Cytokine_Signaling	0.32490658235125
Cellular_Effects_of_Sildenafil_(Viagra)	Triacylglycerol_Degradation	0.32490658235125
Cellular_Effects_of_Sildenafil_(Viagra)	Human_Embryonic_Stem_Cell_Pluripotency	0.32490658235125
Cellular_Effects_of_Sildenafil_(Viagra)	p38_MAPK_Signaling	0.32490658235125
Wnt/_-catenin_Signaling	RhoA_Signaling	0.32494528246081
Factors_Promoting_Cardiogenesis_in_Vertebrates	Cell_Cycle:_G2/M_DNA_Damage_Checkpoint_Regulation	0.324966944524289
Cell_Cycle:_G2/M_DNA_Damage_Checkpoint_Regulation	Glioblastoma_Multiforme_Signaling	0.324966944524289
Cell_Cycle:_G2/M_DNA_Damage_Checkpoint_Regulation	ILK_Signaling	0.324966944524289
Cell_Cycle:_G2/M_DNA_Damage_Checkpoint_Regulation	Signaling_by_Rho_Family_GTPases	0.324966944524289
Cell_Cycle:_G2/M_DNA_Damage_Checkpoint_Regulation	RAR_Activation	0.324966944524289
Cell_Cycle:_G2/M_DNA_Damage_Checkpoint_Regulation	Integrin_Signaling	0.324966944524289
Cell_Cycle:_G2/M_DNA_Damage_Checkpoint_Regulation	Agranulocyte_Adhesion_and_Diapedesis	0.324966944524289
Cell_Cycle:_G2/M_DNA_Damage_Checkpoint_Regulation	Regulation_of_Actin-based_Motility_by_Rho	0.324966944524289
Wnt/_-catenin_Signaling	Role_of_Osteoblasts,_Osteoclasts_and_Chondrocytes_in_Rheumatoid_Arthritis	0.324979789017056
Putrescine_Degradation_III	RhoA_Signaling	0.324987065248635
RhoA_Signaling	Oxidative_Ethanol_Degradation_III	0.324987065248635
RhoA_Signaling	Ethanol_Degradation_IV	0.324987065248635
RhoA_Signaling	Tryptophan_Degradation_X_(Mammalian,_via_Tryptamine)	0.324987065248635
tRNA_Charging	Tight_Junction_Signaling	0.324996864417409
Axonal_Guidance_Signaling	Nitric_Oxide_Signaling_in_the_Cardiovascular_System	0.325029222956788
EIF2_Signaling	Estrogen-mediated_S-phase_Entry	0.325030833228814
Basal_Cell_Carcinoma_Signaling	Role_of_Osteoblasts,_Osteoclasts_and_Chondrocytes_in_Rheumatoid_Arthritis	0.325034013605442
Cellular_Effects_of_Sildenafil_(Viagra)	Granzyme_A_Signaling	0.325054134329788
Axonal_Guidance_Signaling	Prolactin_Signaling	0.325066590016288
Cellular_Effects_of_Sildenafil_(Viagra)	CDK5_Signaling	0.325067548146019
Cellular_Effects_of_Sildenafil_(Viagra)	Fatty_Acid__-oxidation	0.325067548146019
Cellular_Effects_of_Sildenafil_(Viagra)	Histamine_Degradation	0.325067548146019
Ephrin_Receptor_Signaling	Axonal_Guidance_Signaling	0.325076171313596
Tryptophan_Degradation_X_(Mammalian,_via_Tryptamine)	Role_of_Osteoblasts,_Osteoclasts_and_Chondrocytes_in_Rheumatoid_Arthritis	0.325087668870365
Wnt/_-catenin_Signaling	Estrogen-mediated_S-phase_Entry	0.325103519668737
Putrescine_Degradation_III	Role_of_Osteoblasts,_Osteoclasts_and_Chondrocytes_in_Rheumatoid_Arthritis	0.325121203410942
Oxidative_Ethanol_Degradation_III	Role_of_Osteoblasts,_Osteoclasts_and_Chondrocytes_in_Rheumatoid_Arthritis	0.325121203410942
Ethanol_Degradation_IV	Role_of_Osteoblasts,_Osteoclasts_and_Chondrocytes_in_Rheumatoid_Arthritis	0.325121203410942
Role_of_BRCA1_in_DNA_Damage_Response	Role_of_Macrophages,_Fibroblasts_and_Endothelial_Cells_in_Rheumatoid_Arthritis	0.325124832541712
Role_of_Osteoblasts,_Osteoclasts_and_Chondrocytes_in_Rheumatoid_Arthritis	Germ_Cell-Sertoli_Cell_Junction_Signaling	0.32513174283798
Factors_Promoting_Cardiogenesis_in_Vertebrates	Retinoate_Biosynthesis_I	0.325141324135288
Glioblastoma_Multiforme_Signaling	Retinoate_Biosynthesis_I	0.325141324135288
ILK_Signaling	Retinoate_Biosynthesis_I	0.325141324135288
Retinoate_Biosynthesis_I	Signaling_by_Rho_Family_GTPases	0.325141324135288
Retinoate_Biosynthesis_I	RAR_Activation	0.325141324135288
Retinoate_Biosynthesis_I	Integrin_Signaling	0.325141324135288
Retinoate_Biosynthesis_I	Agranulocyte_Adhesion_and_Diapedesis	0.325141324135288
Retinoate_Biosynthesis_I	Regulation_of_Actin-based_Motility_by_Rho	0.325141324135288
EIF2_Signaling	CD28_Signaling_in_T_Helper_Cells	0.325163659666765
EIF2_Signaling	Antioxidant_Action_of_Vitamin_C	0.325163659666765
Calcium_Signaling	Cell_Cycle:_G2/M_DNA_Damage_Checkpoint_Regulation	0.32518156558398
Cell_Cycle:_G2/M_DNA_Damage_Checkpoint_Regulation	IL-6_Signaling	0.32518156558398
RhoA_Signaling	Triacylglycerol_Biosynthesis	0.325228513940788
RhoA_Signaling	Germ_Cell-Sertoli_Cell_Junction_Signaling	0.325252467184057
Role_of_Osteoblasts,_Osteoclasts_and_Chondrocytes_in_Rheumatoid_Arthritis	Triacylglycerol_Biosynthesis	0.325262048481364
Tight_Junction_Signaling	Acute_Phase_Response_Signaling	0.325272601794341
RhoA_Signaling	Axonal_Guidance_Signaling	0.325277378557057
Tight_Junction_Signaling	HMGB1_Signaling	0.325285043594903
Estrogen-mediated_S-phase_Entry	Tryptophan_Degradation_X_(Mammalian,_via_Tryptamine)	0.325297249334516
Cellular_Effects_of_Sildenafil_(Viagra)	CD28_Signaling_in_T_Helper_Cells	0.325302289930056
Cellular_Effects_of_Sildenafil_(Viagra)	Antioxidant_Action_of_Vitamin_C	0.325302289930056
Role_of_Osteoblasts,_Osteoclasts_and_Chondrocytes_in_Rheumatoid_Arthritis	Axonal_Guidance_Signaling	0.325310913097633
Putrescine_Degradation_III	Estrogen-mediated_S-phase_Entry	0.325331755890762
Estrogen-mediated_S-phase_Entry	Oxidative_Ethanol_Degradation_III	0.325331755890762
Estrogen-mediated_S-phase_Entry	Ethanol_Degradation_IV	0.325331755890762
Calcium_Signaling	Retinoate_Biosynthesis_I	0.325355945194979
Retinoate_Biosynthesis_I	IL-6_Signaling	0.325355945194979
Mitotic_Roles_of_Polo-Like_Kinase	Coagulation_System	0.325370804059329
Nitric_Oxide_Signaling_in_the_Cardiovascular_System	Prolactin_Signaling	0.325393791319345
EIF2_Signaling	Calcium_Signaling	0.325413571225592
EIF2_Signaling	IL-6_Signaling	0.325413571225592
EIF2_Signaling	Factors_Promoting_Cardiogenesis_in_Vertebrates	0.325420675516583
EIF2_Signaling	RhoA_Signaling	0.325420675516583
EIF2_Signaling	Glioblastoma_Multiforme_Signaling	0.325420675516583
EIF2_Signaling	ILK_Signaling	0.325420675516583
EIF2_Signaling	Signaling_by_Rho_Family_GTPases	0.325420675516583
EIF2_Signaling	RAR_Activation	0.325420675516583
EIF2_Signaling	Integrin_Signaling	0.325420675516583
EIF2_Signaling	Agranulocyte_Adhesion_and_Diapedesis	0.325420675516583
EIF2_Signaling	Regulation_of_Actin-based_Motility_by_Rho	0.325420675516583
Cellular_Effects_of_Sildenafil_(Viagra)	Colorectal_Cancer_Metastasis_Signaling	0.325436428092364
Cellular_Effects_of_Sildenafil_(Viagra)	Sertoli_Cell-Sertoli_Cell_Junction_Signaling	0.325436428092364
Cellular_Effects_of_Sildenafil_(Viagra)	Thrombin_Signaling	0.325436428092364
Wnt/_-catenin_Signaling	Granzyme_A_Signaling	0.325443135000479
Estrogen-mediated_S-phase_Entry	Germ_Cell-Sertoli_Cell_Junction_Signaling	0.325446120477176
Assembly_of_RNA_Polymerase_II_Complex	Cell_Cycle:_G2/M_DNA_Damage_Checkpoint_Regulation	0.325458937198068
Estrogen-mediated_S-phase_Entry	Triacylglycerol_Biosynthesis	0.325476683426994
Ephrin_Receptor_Signaling	Prolactin_Signaling	0.325507808757306
Epithelial_Adherens_Junction_Signaling	Molecular_Mechanisms_of_Cancer	0.325519077196096
Basal_Cell_Carcinoma_Signaling	Factors_Promoting_Cardiogenesis_in_Vertebrates	0.325543738622209
Basal_Cell_Carcinoma_Signaling	Glioblastoma_Multiforme_Signaling	0.325543738622209
Basal_Cell_Carcinoma_Signaling	ILK_Signaling	0.325543738622209
Basal_Cell_Carcinoma_Signaling	Signaling_by_Rho_Family_GTPases	0.325543738622209
Basal_Cell_Carcinoma_Signaling	RAR_Activation	0.325543738622209
Basal_Cell_Carcinoma_Signaling	Integrin_Signaling	0.325543738622209
Basal_Cell_Carcinoma_Signaling	Agranulocyte_Adhesion_and_Diapedesis	0.325543738622209
Basal_Cell_Carcinoma_Signaling	Regulation_of_Actin-based_Motility_by_Rho	0.325543738622209
Ephrin_Receptor_Signaling	Nitric_Oxide_Signaling_in_the_Cardiovascular_System	0.325543738622209
Cell_Cycle:_G2/M_DNA_Damage_Checkpoint_Regulation	HIF1__Signaling	0.325566733735748
Cell_Cycle:_G2/M_DNA_Damage_Checkpoint_Regulation	Bladder_Cancer_Signaling	0.325566733735748
Factors_Promoting_Cardiogenesis_in_Vertebrates	Tryptophan_Degradation_X_(Mammalian,_via_Tryptamine)	0.325597393887132
Glioblastoma_Multiforme_Signaling	Tryptophan_Degradation_X_(Mammalian,_via_Tryptamine)	0.325597393887132
ILK_Signaling	Tryptophan_Degradation_X_(Mammalian,_via_Tryptamine)	0.325597393887132
Tryptophan_Degradation_X_(Mammalian,_via_Tryptamine)	Signaling_by_Rho_Family_GTPases	0.325597393887132
Tryptophan_Degradation_X_(Mammalian,_via_Tryptamine)	RAR_Activation	0.325597393887132
Tryptophan_Degradation_X_(Mammalian,_via_Tryptamine)	Integrin_Signaling	0.325597393887132
Tryptophan_Degradation_X_(Mammalian,_via_Tryptamine)	Agranulocyte_Adhesion_and_Diapedesis	0.325597393887132
Tryptophan_Degradation_X_(Mammalian,_via_Tryptamine)	Regulation_of_Actin-based_Motility_by_Rho	0.325597393887132
Wnt/_-catenin_Signaling	Factors_Promoting_Cardiogenesis_in_Vertebrates	0.325607808340728
Wnt/_-catenin_Signaling	Glioblastoma_Multiforme_Signaling	0.325607808340728
Wnt/_-catenin_Signaling	ILK_Signaling	0.325607808340728
Wnt/_-catenin_Signaling	Signaling_by_Rho_Family_GTPases	0.325607808340728
Wnt/_-catenin_Signaling	RAR_Activation	0.325607808340728
Wnt/_-catenin_Signaling	Integrin_Signaling	0.325607808340728
Wnt/_-catenin_Signaling	Agranulocyte_Adhesion_and_Diapedesis	0.325607808340728
Wnt/_-catenin_Signaling	Regulation_of_Actin-based_Motility_by_Rho	0.325607808340728
Basal_Cell_Carcinoma_Signaling	Estrogen-mediated_S-phase_Entry	0.325621610963226
RhoA_Signaling	Prolactin_Signaling	0.325621826195267
Cell_Cycle:_G2/M_DNA_Damage_Checkpoint_Regulation	Eicosanoid_Signaling	0.325624221519594
Cell_Cycle:_G2/M_DNA_Damage_Checkpoint_Regulation	Ethanol_Degradation_II	0.325624221519594
Cell_Cycle:_G2/M_DNA_Damage_Checkpoint_Regulation	Noradrenaline_and_Adrenaline_Degradation	0.325624221519594
Cell_Cycle:_G2/M_DNA_Damage_Checkpoint_Regulation	Role_of_JAK2_in_Hormone-like_Cytokine_Signaling	0.325624221519594
Cell_Cycle:_G2/M_DNA_Damage_Checkpoint_Regulation	Triacylglycerol_Degradation	0.325624221519594
Cell_Cycle:_G2/M_DNA_Damage_Checkpoint_Regulation	Human_Embryonic_Stem_Cell_Pluripotency	0.325624221519594
Cell_Cycle:_G2/M_DNA_Damage_Checkpoint_Regulation	p38_MAPK_Signaling	0.325624221519594
Putrescine_Degradation_III	Factors_Promoting_Cardiogenesis_in_Vertebrates	0.325630928427709
Putrescine_Degradation_III	Glioblastoma_Multiforme_Signaling	0.325630928427709
Putrescine_Degradation_III	ILK_Signaling	0.325630928427709
Putrescine_Degradation_III	Signaling_by_Rho_Family_GTPases	0.325630928427709
Putrescine_Degradation_III	RAR_Activation	0.325630928427709
Putrescine_Degradation_III	Integrin_Signaling	0.325630928427709
Putrescine_Degradation_III	Agranulocyte_Adhesion_and_Diapedesis	0.325630928427709
Putrescine_Degradation_III	Regulation_of_Actin-based_Motility_by_Rho	0.325630928427709
Factors_Promoting_Cardiogenesis_in_Vertebrates	Oxidative_Ethanol_Degradation_III	0.325630928427709
Factors_Promoting_Cardiogenesis_in_Vertebrates	Ethanol_Degradation_IV	0.325630928427709
Oxidative_Ethanol_Degradation_III	Glioblastoma_Multiforme_Signaling	0.325630928427709
Oxidative_Ethanol_Degradation_III	ILK_Signaling	0.325630928427709
Oxidative_Ethanol_Degradation_III	Signaling_by_Rho_Family_GTPases	0.325630928427709
Oxidative_Ethanol_Degradation_III	RAR_Activation	0.325630928427709
Oxidative_Ethanol_Degradation_III	Integrin_Signaling	0.325630928427709
Oxidative_Ethanol_Degradation_III	Agranulocyte_Adhesion_and_Diapedesis	0.325630928427709
Oxidative_Ethanol_Degradation_III	Regulation_of_Actin-based_Motility_by_Rho	0.325630928427709
Ethanol_Degradation_IV	Glioblastoma_Multiforme_Signaling	0.325630928427709
Ethanol_Degradation_IV	ILK_Signaling	0.325630928427709
Ethanol_Degradation_IV	Signaling_by_Rho_Family_GTPases	0.325630928427709
Ethanol_Degradation_IV	RAR_Activation	0.325630928427709
Ethanol_Degradation_IV	Integrin_Signaling	0.325630928427709
Ethanol_Degradation_IV	Agranulocyte_Adhesion_and_Diapedesis	0.325630928427709
Ethanol_Degradation_IV	Regulation_of_Actin-based_Motility_by_Rho	0.325630928427709
Cellular_Effects_of_Sildenafil_(Viagra)	IL-8_Signaling	0.325637635335824
Role_of_Osteoblasts,_Osteoclasts_and_Chondrocytes_in_Rheumatoid_Arthritis	Prolactin_Signaling	0.325655360735844
Cell_Cycle:_G2/M_DNA_Damage_Checkpoint_Regulation	CDK5_Signaling	0.325684583692632
Cell_Cycle:_G2/M_DNA_Damage_Checkpoint_Regulation	Fatty_Acid__-oxidation	0.325684583692632
Cell_Cycle:_G2/M_DNA_Damage_Checkpoint_Regulation	Histamine_Degradation	0.325684583692632
Cell_Cycle:_G2/M_DNA_Damage_Checkpoint_Regulation	Granzyme_A_Signaling	0.325704704416978
HIF1__Signaling	Retinoate_Biosynthesis_I	0.32570757880617
Retinoate_Biosynthesis_I	Bladder_Cancer_Signaling	0.32570757880617
Estrogen-mediated_S-phase_Entry	Axonal_Guidance_Signaling	0.325734003746426
RhoA_Signaling	Nitric_Oxide_Signaling_in_the_Cardiovascular_System	0.32574494586567
EIF2_Signaling	HIF1__Signaling	0.325750517598344
EIF2_Signaling	Bladder_Cancer_Signaling	0.325750517598344
Retinoate_Biosynthesis_I	Eicosanoid_Signaling	0.325798601130593
Retinoate_Biosynthesis_I	Ethanol_Degradation_II	0.325798601130593
Retinoate_Biosynthesis_I	Noradrenaline_and_Adrenaline_Degradation	0.325798601130593
Retinoate_Biosynthesis_I	Role_of_JAK2_in_Hormone-like_Cytokine_Signaling	0.325798601130593
Retinoate_Biosynthesis_I	Triacylglycerol_Degradation	0.325798601130593
Retinoate_Biosynthesis_I	Human_Embryonic_Stem_Cell_Pluripotency	0.325798601130593
Retinoate_Biosynthesis_I	p38_MAPK_Signaling	0.325798601130593
EIF2_Signaling	Eicosanoid_Signaling	0.325804307230138
EIF2_Signaling	Ethanol_Degradation_II	0.325804307230138
EIF2_Signaling	Noradrenaline_and_Adrenaline_Degradation	0.325804307230138
EIF2_Signaling	Role_of_JAK2_in_Hormone-like_Cytokine_Signaling	0.325804307230138
EIF2_Signaling	Triacylglycerol_Degradation	0.325804307230138
EIF2_Signaling	Human_Embryonic_Stem_Cell_Pluripotency	0.325804307230138
EIF2_Signaling	p38_MAPK_Signaling	0.325804307230138
Calcium_Signaling	Tryptophan_Degradation_X_(Mammalian,_via_Tryptamine)	0.325812014946824
Tryptophan_Degradation_X_(Mammalian,_via_Tryptamine)	IL-6_Signaling	0.325812014946824
Wnt/_-catenin_Signaling	Calcium_Signaling	0.3258286503007
Wnt/_-catenin_Signaling	IL-6_Signaling	0.3258286503007
Basal_Cell_Carcinoma_Signaling	Calcium_Signaling	0.325858963303631
Basal_Cell_Carcinoma_Signaling	IL-6_Signaling	0.325858963303631
RhoA_Signaling	Ephrin_Receptor_Signaling	0.325858963303631
Retinoate_Biosynthesis_I	CDK5_Signaling	0.325858963303631
Wnt/_-catenin_Signaling	Assembly_of_RNA_Polymerase_II_Complex	0.325866723500995
EIF2_Signaling	Fatty_Acid__-oxidation	0.325868245849064
EIF2_Signaling	Histamine_Degradation	0.325868245849064
Factors_Promoting_Cardiogenesis_in_Vertebrates	Triacylglycerol_Biosynthesis	0.325872377119862
Glioblastoma_Multiforme_Signaling	Triacylglycerol_Biosynthesis	0.325872377119862
ILK_Signaling	Triacylglycerol_Biosynthesis	0.325872377119862
Signaling_by_Rho_Family_GTPases	Triacylglycerol_Biosynthesis	0.325872377119862
RAR_Activation	Triacylglycerol_Biosynthesis	0.325872377119862
Integrin_Signaling	Triacylglycerol_Biosynthesis	0.325872377119862
Triacylglycerol_Biosynthesis	Agranulocyte_Adhesion_and_Diapedesis	0.325872377119862
Triacylglycerol_Biosynthesis	Regulation_of_Actin-based_Motility_by_Rho	0.325872377119862
Role_of_Osteoblasts,_Osteoclasts_and_Chondrocytes_in_Rheumatoid_Arthritis	Nitric_Oxide_Signaling_in_the_Cardiovascular_System	0.325879084027977
Ephrin_Receptor_Signaling	Role_of_Osteoblasts,_Osteoclasts_and_Chondrocytes_in_Rheumatoid_Arthritis	0.325892497844208
Retinoate_Biosynthesis_I	Granzyme_A_Signaling	0.325892497844208
Role_of_BRCA1_in_DNA_Damage_Response	HMGB1_Signaling	0.325902244955953
Factors_Promoting_Cardiogenesis_in_Vertebrates	Axonal_Guidance_Signaling	0.325921241736131
Glioblastoma_Multiforme_Signaling	Axonal_Guidance_Signaling	0.325921241736131
ILK_Signaling	Axonal_Guidance_Signaling	0.325921241736131
Signaling_by_Rho_Family_GTPases	Axonal_Guidance_Signaling	0.325921241736131
Axonal_Guidance_Signaling	RAR_Activation	0.325921241736131
Axonal_Guidance_Signaling	Integrin_Signaling	0.325921241736131
Axonal_Guidance_Signaling	Agranulocyte_Adhesion_and_Diapedesis	0.325921241736131
Axonal_Guidance_Signaling	Regulation_of_Actin-based_Motility_by_Rho	0.325921241736131
Factors_Promoting_Cardiogenesis_in_Vertebrates	Germ_Cell-Sertoli_Cell_Junction_Signaling	0.325929864903708
Glioblastoma_Multiforme_Signaling	Germ_Cell-Sertoli_Cell_Junction_Signaling	0.325929864903708
ILK_Signaling	Germ_Cell-Sertoli_Cell_Junction_Signaling	0.325929864903708
Signaling_by_Rho_Family_GTPases	Germ_Cell-Sertoli_Cell_Junction_Signaling	0.325929864903708
RAR_Activation	Germ_Cell-Sertoli_Cell_Junction_Signaling	0.325929864903708
Integrin_Signaling	Germ_Cell-Sertoli_Cell_Junction_Signaling	0.325929864903708
Germ_Cell-Sertoli_Cell_Junction_Signaling	Agranulocyte_Adhesion_and_Diapedesis	0.325929864903708
Germ_Cell-Sertoli_Cell_Junction_Signaling	Regulation_of_Actin-based_Motility_by_Rho	0.325929864903708
Putrescine_Degradation_III	Calcium_Signaling	0.325946153109131
Putrescine_Degradation_III	IL-6_Signaling	0.325946153109131
Calcium_Signaling	Oxidative_Ethanol_Degradation_III	0.325946153109131
Calcium_Signaling	Ethanol_Degradation_IV	0.325946153109131
Oxidative_Ethanol_Degradation_III	IL-6_Signaling	0.325946153109131
Ethanol_Degradation_IV	IL-6_Signaling	0.325946153109131
Calcium_Signaling	Germ_Cell-Sertoli_Cell_Junction_Signaling	0.325956692536169
Germ_Cell-Sertoli_Cell_Junction_Signaling	IL-6_Signaling	0.325956692536169
Regulation_of_the_Epithelial-Mesenchymal_Transition_Pathway	Molecular_Mechanisms_of_Cancer	0.325960761116041
EIF2_Signaling	CDK5_Signaling	0.325981914504932
Assembly_of_RNA_Polymerase_II_Complex	Basal_Cell_Carcinoma_Signaling	0.325983436853002
Estrogen-mediated_S-phase_Entry	Prolactin_Signaling	0.325984915705413
Calcium_Signaling	Triacylglycerol_Biosynthesis	0.325986394557823
Triacylglycerol_Biosynthesis	IL-6_Signaling	0.325986394557823
Role_of_BRCA1_in_DNA_Damage_Response	Acute_Phase_Response_Signaling	0.32600652201179
Assembly_of_RNA_Polymerase_II_Complex	Germ_Cell-Sertoli_Cell_Junction_Signaling	0.326028788326925
Assembly_of_RNA_Polymerase_II_Complex	Tryptophan_Degradation_X_(Mammalian,_via_Tryptamine)	0.326038647342995
EIF2_Signaling	Granzyme_A_Signaling	0.326038748832866
Wnt/_-catenin_Signaling	HIF1__Signaling	0.326052449965493
Wnt/_-catenin_Signaling	Bladder_Cancer_Signaling	0.326052449965493
Mitotic_Roles_of_Polo-Like_Kinase	Salvage_Pathways_of_Pyrimidine_Deoxyribonucleotides	0.326052589385923
Cell_Cycle:_G2/M_DNA_Damage_Checkpoint_Regulation	Colorectal_Cancer_Metastasis_Signaling	0.326053463638977
Cell_Cycle:_G2/M_DNA_Damage_Checkpoint_Regulation	Sertoli_Cell-Sertoli_Cell_Junction_Signaling	0.326053463638977
Cell_Cycle:_G2/M_DNA_Damage_Checkpoint_Regulation	Thrombin_Signaling	0.326053463638977
Assembly_of_RNA_Polymerase_II_Complex	Putrescine_Degradation_III	0.326073153899241
Assembly_of_RNA_Polymerase_II_Complex	Oxidative_Ethanol_Degradation_III	0.326073153899241
Assembly_of_RNA_Polymerase_II_Complex	Ethanol_Degradation_IV	0.326073153899241
Cell_Cycle:_G2/M_DNA_Damage_Checkpoint_Regulation	CD28_Signaling_in_T_Helper_Cells	0.3261071189039
Cell_Cycle:_G2/M_DNA_Damage_Checkpoint_Regulation	Antioxidant_Action_of_Vitamin_C	0.3261071189039
Basal_Cell_Carcinoma_Signaling	HIF1__Signaling	0.326109993293092
Basal_Cell_Carcinoma_Signaling	Bladder_Cancer_Signaling	0.326109993293092
Estrogen-mediated_S-phase_Entry	Nitric_Oxide_Signaling_in_the_Cardiovascular_System	0.326111604061915
Retinoate_Biosynthesis_I	Fatty_Acid__-oxidation	0.326133946536361
Retinoate_Biosynthesis_I	Histamine_Degradation	0.326133946536361
Cellular_Effects_of_Sildenafil_(Viagra)	Coagulation_System	0.326142167011732
Mitotic_Roles_of_Polo-Like_Kinase	LPS/IL-1_Mediated_Inhibition_of_RXR_Function	0.326163153786105
HIF1__Signaling	Tryptophan_Degradation_X_(Mammalian,_via_Tryptamine)	0.326163648558015
Tryptophan_Degradation_X_(Mammalian,_via_Tryptamine)	Bladder_Cancer_Signaling	0.326163648558015
Wnt/_-catenin_Signaling	CDK5_Signaling	0.326187518485655
Wnt/_-catenin_Signaling	Fatty_Acid__-oxidation	0.326187518485655
Wnt/_-catenin_Signaling	Histamine_Degradation	0.326187518485655
RhoA_Signaling	Role_of_Osteoblasts,_Osteoclasts_and_Chondrocytes_in_Rheumatoid_Arthritis	0.326194308709399
Retinoate_Biosynthesis_I	CD28_Signaling_in_T_Helper_Cells	0.326194308709399
Retinoate_Biosynthesis_I	Antioxidant_Action_of_Vitamin_C	0.326194308709399
Putrescine_Degradation_III	HIF1__Signaling	0.326197183098592
Putrescine_Degradation_III	Bladder_Cancer_Signaling	0.326197183098592
Oxidative_Ethanol_Degradation_III	HIF1__Signaling	0.326197183098592
Oxidative_Ethanol_Degradation_III	Bladder_Cancer_Signaling	0.326197183098592
Ethanol_Degradation_IV	HIF1__Signaling	0.326197183098592
Ethanol_Degradation_IV	Bladder_Cancer_Signaling	0.326197183098592
Basal_Cell_Carcinoma_Signaling	Eicosanoid_Signaling	0.326201015617515
Basal_Cell_Carcinoma_Signaling	Ethanol_Degradation_II	0.326201015617515
Basal_Cell_Carcinoma_Signaling	Noradrenaline_and_Adrenaline_Degradation	0.326201015617515
Basal_Cell_Carcinoma_Signaling	Role_of_JAK2_in_Hormone-like_Cytokine_Signaling	0.326201015617515
Basal_Cell_Carcinoma_Signaling	Triacylglycerol_Degradation	0.326201015617515
Basal_Cell_Carcinoma_Signaling	Human_Embryonic_Stem_Cell_Pluripotency	0.326201015617515
Basal_Cell_Carcinoma_Signaling	p38_MAPK_Signaling	0.326201015617515
Assembly_of_RNA_Polymerase_II_Complex	Triacylglycerol_Biosynthesis	0.326218081435473
Retinoate_Biosynthesis_I	Colorectal_Cancer_Metastasis_Signaling	0.326227843249976
Retinoate_Biosynthesis_I	Sertoli_Cell-Sertoli_Cell_Junction_Signaling	0.326227843249976
Retinoate_Biosynthesis_I	Thrombin_Signaling	0.326227843249976
Cellular_Effects_of_Sildenafil_(Viagra)	Thyroid_Cancer_Signaling	0.326230717639168
Factors_Promoting_Cardiogenesis_in_Vertebrates	Prolactin_Signaling	0.326265689374341
Glioblastoma_Multiforme_Signaling	Prolactin_Signaling	0.326265689374341
ILK_Signaling	Prolactin_Signaling	0.326265689374341
Signaling_by_Rho_Family_GTPases	Prolactin_Signaling	0.326265689374341
RAR_Activation	Prolactin_Signaling	0.326265689374341
Integrin_Signaling	Prolactin_Signaling	0.326265689374341
Prolactin_Signaling	Agranulocyte_Adhesion_and_Diapedesis	0.326265689374341
Prolactin_Signaling	Regulation_of_Actin-based_Motility_by_Rho	0.326265689374341
Wnt/_-catenin_Signaling	Eicosanoid_Signaling	0.326284136843143
Wnt/_-catenin_Signaling	Ethanol_Degradation_II	0.326284136843143
Wnt/_-catenin_Signaling	Noradrenaline_and_Adrenaline_Degradation	0.326284136843143
Wnt/_-catenin_Signaling	Role_of_JAK2_in_Hormone-like_Cytokine_Signaling	0.326284136843143
Wnt/_-catenin_Signaling	Triacylglycerol_Degradation	0.326284136843143
Wnt/_-catenin_Signaling	Human_Embryonic_Stem_Cell_Pluripotency	0.326284136843143
Wnt/_-catenin_Signaling	p38_MAPK_Signaling	0.326284136843143
Calcium_Signaling	Axonal_Guidance_Signaling	0.326303535498707
Axonal_Guidance_Signaling	IL-6_Signaling	0.326303535498707
HIF1__Signaling	Germ_Cell-Sertoli_Cell_Junction_Signaling	0.32630832614736
Bladder_Cancer_Signaling	Germ_Cell-Sertoli_Cell_Junction_Signaling	0.32630832614736
Tryptophan_Degradation_X_(Mammalian,_via_Tryptamine)	CDK5_Signaling	0.326315033055476
Assembly_of_RNA_Polymerase_II_Complex	Axonal_Guidance_Signaling	0.326316671596175
Cellular_Effects_of_Sildenafil_(Viagra)	Dendritic_Cell_Maturation	0.326331321260899
HIF1__Signaling	Triacylglycerol_Biosynthesis	0.326338028169014
Bladder_Cancer_Signaling	Triacylglycerol_Biosynthesis	0.326338028169014
Basal_Cell_Carcinoma_Signaling	Granzyme_A_Signaling	0.326348567596053
Putrescine_Degradation_III	CDK5_Signaling	0.326348567596053
Oxidative_Ethanol_Degradation_III	CDK5_Signaling	0.326348567596053
Ethanol_Degradation_IV	CDK5_Signaling	0.326348567596053
Cell_Cycle:_G2/M_DNA_Damage_Checkpoint_Regulation	IL-8_Signaling	0.326355274504168
Basal_Cell_Carcinoma_Signaling	CDK5_Signaling	0.326361981412283
Basal_Cell_Carcinoma_Signaling	Fatty_Acid__-oxidation	0.326361981412283
Basal_Cell_Carcinoma_Signaling	Histamine_Degradation	0.326361981412283
EIF2_Signaling	Colorectal_Cancer_Metastasis_Signaling	0.326372650509479
EIF2_Signaling	Sertoli_Cell-Sertoli_Cell_Junction_Signaling	0.326372650509479
EIF2_Signaling	Thrombin_Signaling	0.326372650509479
Putrescine_Degradation_III	Eicosanoid_Signaling	0.326388809044745
Putrescine_Degradation_III	Ethanol_Degradation_II	0.326388809044745
Putrescine_Degradation_III	Noradrenaline_and_Adrenaline_Degradation	0.326388809044745
Putrescine_Degradation_III	Role_of_JAK2_in_Hormone-like_Cytokine_Signaling	0.326388809044745
Putrescine_Degradation_III	Triacylglycerol_Degradation	0.326388809044745
Putrescine_Degradation_III	Human_Embryonic_Stem_Cell_Pluripotency	0.326388809044745
Putrescine_Degradation_III	p38_MAPK_Signaling	0.326388809044745
Factors_Promoting_Cardiogenesis_in_Vertebrates	Nitric_Oxide_Signaling_in_the_Cardiovascular_System	0.326388809044745
Oxidative_Ethanol_Degradation_III	Eicosanoid_Signaling	0.326388809044745
Oxidative_Ethanol_Degradation_III	Ethanol_Degradation_II	0.326388809044745
Oxidative_Ethanol_Degradation_III	Noradrenaline_and_Adrenaline_Degradation	0.326388809044745
Oxidative_Ethanol_Degradation_III	Role_of_JAK2_in_Hormone-like_Cytokine_Signaling	0.326388809044745
Oxidative_Ethanol_Degradation_III	Triacylglycerol_Degradation	0.326388809044745
Oxidative_Ethanol_Degradation_III	Human_Embryonic_Stem_Cell_Pluripotency	0.326388809044745
Oxidative_Ethanol_Degradation_III	p38_MAPK_Signaling	0.326388809044745
Ethanol_Degradation_IV	Eicosanoid_Signaling	0.326388809044745
Ethanol_Degradation_IV	Ethanol_Degradation_II	0.326388809044745
Ethanol_Degradation_IV	Noradrenaline_and_Adrenaline_Degradation	0.326388809044745
Ethanol_Degradation_IV	Role_of_JAK2_in_Hormone-like_Cytokine_Signaling	0.326388809044745
Ethanol_Degradation_IV	Triacylglycerol_Degradation	0.326388809044745
Ethanol_Degradation_IV	Human_Embryonic_Stem_Cell_Pluripotency	0.326388809044745
Ethanol_Degradation_IV	p38_MAPK_Signaling	0.326388809044745
Glioblastoma_Multiforme_Signaling	Nitric_Oxide_Signaling_in_the_Cardiovascular_System	0.326388809044745
ILK_Signaling	Nitric_Oxide_Signaling_in_the_Cardiovascular_System	0.326388809044745
Signaling_by_Rho_Family_GTPases	Nitric_Oxide_Signaling_in_the_Cardiovascular_System	0.326388809044745
RAR_Activation	Nitric_Oxide_Signaling_in_the_Cardiovascular_System	0.326388809044745
Integrin_Signaling	Nitric_Oxide_Signaling_in_the_Cardiovascular_System	0.326388809044745
Nitric_Oxide_Signaling_in_the_Cardiovascular_System	Agranulocyte_Adhesion_and_Diapedesis	0.326388809044745
Nitric_Oxide_Signaling_in_the_Cardiovascular_System	Regulation_of_Actin-based_Motility_by_Rho	0.326388809044745
Eicosanoid_Signaling	Germ_Cell-Sertoli_Cell_Junction_Signaling	0.326399348471783
Ethanol_Degradation_II	Germ_Cell-Sertoli_Cell_Junction_Signaling	0.326399348471783
Noradrenaline_and_Adrenaline_Degradation	Germ_Cell-Sertoli_Cell_Junction_Signaling	0.326399348471783
Role_of_JAK2_in_Hormone-like_Cytokine_Signaling	Germ_Cell-Sertoli_Cell_Junction_Signaling	0.326399348471783
Triacylglycerol_Degradation	Germ_Cell-Sertoli_Cell_Junction_Signaling	0.326399348471783
Germ_Cell-Sertoli_Cell_Junction_Signaling	Human_Embryonic_Stem_Cell_Pluripotency	0.326399348471783
Germ_Cell-Sertoli_Cell_Junction_Signaling	p38_MAPK_Signaling	0.326399348471783
Tryptophan_Degradation_X_(Mammalian,_via_Tryptamine)	Granzyme_A_Signaling	0.326402222860975
Tryptophan_Degradation_X_(Mammalian,_via_Tryptamine)	Eicosanoid_Signaling	0.326408929769091
Tryptophan_Degradation_X_(Mammalian,_via_Tryptamine)	Ethanol_Degradation_II	0.326408929769091
Tryptophan_Degradation_X_(Mammalian,_via_Tryptamine)	Noradrenaline_and_Adrenaline_Degradation	0.326408929769091
Tryptophan_Degradation_X_(Mammalian,_via_Tryptamine)	Role_of_JAK2_in_Hormone-like_Cytokine_Signaling	0.326408929769091
Tryptophan_Degradation_X_(Mammalian,_via_Tryptamine)	Triacylglycerol_Degradation	0.326408929769091
Tryptophan_Degradation_X_(Mammalian,_via_Tryptamine)	Human_Embryonic_Stem_Cell_Pluripotency	0.326408929769091
Tryptophan_Degradation_X_(Mammalian,_via_Tryptamine)	p38_MAPK_Signaling	0.326408929769091
Tryptophan_Degradation_X_(Mammalian,_via_Tryptamine)	Fatty_Acid__-oxidation	0.326415636677206
Tryptophan_Degradation_X_(Mammalian,_via_Tryptamine)	Histamine_Degradation	0.326415636677206
Putrescine_Degradation_III	Granzyme_A_Signaling	0.326435757401552
Oxidative_Ethanol_Degradation_III	Granzyme_A_Signaling	0.326435757401552
Ethanol_Degradation_IV	Granzyme_A_Signaling	0.326435757401552
Putrescine_Degradation_III	Fatty_Acid__-oxidation	0.326449171217783
Putrescine_Degradation_III	Histamine_Degradation	0.326449171217783
Oxidative_Ethanol_Degradation_III	Fatty_Acid__-oxidation	0.326449171217783
Oxidative_Ethanol_Degradation_III	Histamine_Degradation	0.326449171217783
Ethanol_Degradation_IV	Fatty_Acid__-oxidation	0.326449171217783
Ethanol_Degradation_IV	Histamine_Degradation	0.326449171217783
HIF1__Signaling	Axonal_Guidance_Signaling	0.326453961866437
Bladder_Cancer_Signaling	Axonal_Guidance_Signaling	0.326453961866437
CDK5_Signaling	Germ_Cell-Sertoli_Cell_Junction_Signaling	0.326459710644821
Germ_Cell-Sertoli_Cell_Junction_Signaling	Fatty_Acid__-oxidation	0.326459710644821
Germ_Cell-Sertoli_Cell_Junction_Signaling	Histamine_Degradation	0.326459710644821
Triacylglycerol_Biosynthesis	CDK5_Signaling	0.326489412666475
Triacylglycerol_Biosynthesis	Fatty_Acid__-oxidation	0.326489412666475
Triacylglycerol_Biosynthesis	Histamine_Degradation	0.326489412666475
Factors_Promoting_Cardiogenesis_in_Vertebrates	Ephrin_Receptor_Signaling	0.326502826482706
Glioblastoma_Multiforme_Signaling	Ephrin_Receptor_Signaling	0.326502826482706
ILK_Signaling	Ephrin_Receptor_Signaling	0.326502826482706
Ephrin_Receptor_Signaling	Signaling_by_Rho_Family_GTPases	0.326502826482706
Ephrin_Receptor_Signaling	RAR_Activation	0.326502826482706
Ephrin_Receptor_Signaling	Integrin_Signaling	0.326502826482706
Ephrin_Receptor_Signaling	Agranulocyte_Adhesion_and_Diapedesis	0.326502826482706
Ephrin_Receptor_Signaling	Regulation_of_Actin-based_Motility_by_Rho	0.326502826482706
Acute_Phase_Response_Signaling	Regulation_of_the_Epithelial-Mesenchymal_Transition_Pathway	0.326525682736863
Retinoate_Biosynthesis_I	IL-8_Signaling	0.326529654115167
Eicosanoid_Signaling	Triacylglycerol_Biosynthesis	0.326529654115167
Ethanol_Degradation_II	Triacylglycerol_Biosynthesis	0.326529654115167
Noradrenaline_and_Adrenaline_Degradation	Triacylglycerol_Biosynthesis	0.326529654115167
Role_of_JAK2_in_Hormone-like_Cytokine_Signaling	Triacylglycerol_Biosynthesis	0.326529654115167
Triacylglycerol_Biosynthesis	Triacylglycerol_Degradation	0.326529654115167
Triacylglycerol_Biosynthesis	Human_Embryonic_Stem_Cell_Pluripotency	0.326529654115167
Triacylglycerol_Biosynthesis	p38_MAPK_Signaling	0.326529654115167
RhoA_Signaling	Estrogen-mediated_S-phase_Entry	0.326539485359361
Cellular_Effects_of_Sildenafil_(Viagra)	Estrogen_Receptor_Signaling	0.326542443064182
Germ_Cell-Sertoli_Cell_Junction_Signaling	Granzyme_A_Signaling	0.326546900450321
tRNA_Charging	Cellular_Effects_of_Sildenafil_(Viagra)	0.326547932605878
Wnt/_-catenin_Signaling	CD28_Signaling_in_T_Helper_Cells	0.326553287981859
Wnt/_-catenin_Signaling	Antioxidant_Action_of_Vitamin_C	0.326553287981859
Basal_Cell_Carcinoma_Signaling	CD28_Signaling_in_T_Helper_Cells	0.326563188655744
Basal_Cell_Carcinoma_Signaling	Antioxidant_Action_of_Vitamin_C	0.326563188655744
Wnt/_-catenin_Signaling	Colorectal_Cancer_Metastasis_Signaling	0.326567090604358
Wnt/_-catenin_Signaling	Sertoli_Cell-Sertoli_Cell_Junction_Signaling	0.326567090604358
Wnt/_-catenin_Signaling	Thrombin_Signaling	0.326567090604358
Estrogen-mediated_S-phase_Entry	Role_of_Osteoblasts,_Osteoclasts_and_Chondrocytes_in_Rheumatoid_Arthritis	0.326573991915607
Triacylglycerol_Biosynthesis	Granzyme_A_Signaling	0.326576602471975
Eicosanoid_Signaling	Axonal_Guidance_Signaling	0.326578518731436
Ethanol_Degradation_II	Axonal_Guidance_Signaling	0.326578518731436
Axonal_Guidance_Signaling	Noradrenaline_and_Adrenaline_Degradation	0.326578518731436
Axonal_Guidance_Signaling	Role_of_JAK2_in_Hormone-like_Cytokine_Signaling	0.326578518731436
Axonal_Guidance_Signaling	Triacylglycerol_Degradation	0.326578518731436
Axonal_Guidance_Signaling	Human_Embryonic_Stem_Cell_Pluripotency	0.326578518731436
Axonal_Guidance_Signaling	p38_MAPK_Signaling	0.326578518731436
Cellular_Effects_of_Sildenafil_(Viagra)	Estrogen-Dependent_Breast_Cancer_Signaling	0.326606304493628
Estrogen-mediated_S-phase_Entry	Ephrin_Receptor_Signaling	0.326608498471853
tRNA_Charging	Cell_Cycle:_G2/M_DNA_Damage_Checkpoint_Regulation	0.326613779840294
Axonal_Guidance_Signaling	Fatty_Acid__-oxidation	0.326638880904474
Axonal_Guidance_Signaling	Histamine_Degradation	0.326638880904474
Assembly_of_RNA_Polymerase_II_Complex	Prolactin_Signaling	0.326644483880509
Putrescine_Degradation_III	CD28_Signaling_in_T_Helper_Cells	0.326650378461244
Putrescine_Degradation_III	Antioxidant_Action_of_Vitamin_C	0.326650378461244
Oxidative_Ethanol_Degradation_III	CD28_Signaling_in_T_Helper_Cells	0.326650378461244
Oxidative_Ethanol_Degradation_III	Antioxidant_Action_of_Vitamin_C	0.326650378461244
Ethanol_Degradation_IV	CD28_Signaling_in_T_Helper_Cells	0.326650378461244
Ethanol_Degradation_IV	Antioxidant_Action_of_Vitamin_C	0.326650378461244
Tryptophan_Degradation_X_(Mammalian,_via_Tryptamine)	CD28_Signaling_in_T_Helper_Cells	0.326650378461244
Tryptophan_Degradation_X_(Mammalian,_via_Tryptamine)	Antioxidant_Action_of_Vitamin_C	0.326650378461244
tRNA_Charging	Retinoate_Biosynthesis_I	0.326657677996572
Calcium_Signaling	Prolactin_Signaling	0.326668103861263
Prolactin_Signaling	IL-6_Signaling	0.326668103861263
Axonal_Guidance_Signaling	CDK5_Signaling	0.326672415445051
Cellular_Effects_of_Sildenafil_(Viagra)	_-linolenate_Biosynthesis_II_(Animals)	0.326680080482897
Cellular_Effects_of_Sildenafil_(Viagra)	FXR/RXR_Activation	0.326680080482897
Tryptophan_Degradation_X_(Mammalian,_via_Tryptamine)	Colorectal_Cancer_Metastasis_Signaling	0.32668391300182
Tryptophan_Degradation_X_(Mammalian,_via_Tryptamine)	Sertoli_Cell-Sertoli_Cell_Junction_Signaling	0.32668391300182
Tryptophan_Degradation_X_(Mammalian,_via_Tryptamine)	Thrombin_Signaling	0.32668391300182
EIF2_Signaling	IL-8_Signaling	0.326692343604108
Calcium_Signaling	Nitric_Oxide_Signaling_in_the_Cardiovascular_System	0.326704033726167
Nitric_Oxide_Signaling_in_the_Cardiovascular_System	IL-6_Signaling	0.326704033726167
Putrescine_Degradation_III	Colorectal_Cancer_Metastasis_Signaling	0.326717447542397
Putrescine_Degradation_III	Sertoli_Cell-Sertoli_Cell_Junction_Signaling	0.326717447542397
Putrescine_Degradation_III	Thrombin_Signaling	0.326717447542397
Oxidative_Ethanol_Degradation_III	Colorectal_Cancer_Metastasis_Signaling	0.326717447542397
Oxidative_Ethanol_Degradation_III	Sertoli_Cell-Sertoli_Cell_Junction_Signaling	0.326717447542397
Oxidative_Ethanol_Degradation_III	Thrombin_Signaling	0.326717447542397
Ethanol_Degradation_IV	Colorectal_Cancer_Metastasis_Signaling	0.326717447542397
Ethanol_Degradation_IV	Sertoli_Cell-Sertoli_Cell_Junction_Signaling	0.326717447542397
Ethanol_Degradation_IV	Thrombin_Signaling	0.326717447542397
Basal_Cell_Carcinoma_Signaling	Colorectal_Cancer_Metastasis_Signaling	0.326730861358628
Basal_Cell_Carcinoma_Signaling	Sertoli_Cell-Sertoli_Cell_Junction_Signaling	0.326730861358628
Basal_Cell_Carcinoma_Signaling	Thrombin_Signaling	0.326730861358628
Axonal_Guidance_Signaling	Granzyme_A_Signaling	0.326769186547859
Germ_Cell-Sertoli_Cell_Junction_Signaling	CD28_Signaling_in_T_Helper_Cells	0.326795056050589
Germ_Cell-Sertoli_Cell_Junction_Signaling	Antioxidant_Action_of_Vitamin_C	0.326795056050589
Assembly_of_RNA_Polymerase_II_Complex	Nitric_Oxide_Signaling_in_the_Cardiovascular_System	0.3267977915804
HIF1__Signaling	Prolactin_Signaling	0.326798409504647
Bladder_Cancer_Signaling	Prolactin_Signaling	0.326798409504647
Calcium_Signaling	Ephrin_Receptor_Signaling	0.326818051164128
Ephrin_Receptor_Signaling	IL-6_Signaling	0.326818051164128
Triacylglycerol_Biosynthesis	CD28_Signaling_in_T_Helper_Cells	0.326824758072243
Triacylglycerol_Biosynthesis	Antioxidant_Action_of_Vitamin_C	0.326824758072243
Germ_Cell-Sertoli_Cell_Junction_Signaling	Colorectal_Cancer_Metastasis_Signaling	0.326828590591166
Germ_Cell-Sertoli_Cell_Junction_Signaling	Sertoli_Cell-Sertoli_Cell_Junction_Signaling	0.326828590591166
Germ_Cell-Sertoli_Cell_Junction_Signaling	Thrombin_Signaling	0.326828590591166
Factors_Promoting_Cardiogenesis_in_Vertebrates	Role_of_Osteoblasts,_Osteoclasts_and_Chondrocytes_in_Rheumatoid_Arthritis	0.326838171888474
Glioblastoma_Multiforme_Signaling	Role_of_Osteoblasts,_Osteoclasts_and_Chondrocytes_in_Rheumatoid_Arthritis	0.326838171888474
ILK_Signaling	Role_of_Osteoblasts,_Osteoclasts_and_Chondrocytes_in_Rheumatoid_Arthritis	0.326838171888474
Role_of_Osteoblasts,_Osteoclasts_and_Chondrocytes_in_Rheumatoid_Arthritis	Signaling_by_Rho_Family_GTPases	0.326838171888474
Role_of_Osteoblasts,_Osteoclasts_and_Chondrocytes_in_Rheumatoid_Arthritis	RAR_Activation	0.326838171888474
Role_of_Osteoblasts,_Osteoclasts_and_Chondrocytes_in_Rheumatoid_Arthritis	Integrin_Signaling	0.326838171888474
Role_of_Osteoblasts,_Osteoclasts_and_Chondrocytes_in_Rheumatoid_Arthritis	Agranulocyte_Adhesion_and_Diapedesis	0.326838171888474
Role_of_Osteoblasts,_Osteoclasts_and_Chondrocytes_in_Rheumatoid_Arthritis	Regulation_of_Actin-based_Motility_by_Rho	0.326838171888474
Mitotic_Roles_of_Polo-Like_Kinase	Molecular_Mechanisms_of_Cancer	0.326838911132935
Triacylglycerol_Biosynthesis	Colorectal_Cancer_Metastasis_Signaling	0.32685829261282
Triacylglycerol_Biosynthesis	Sertoli_Cell-Sertoli_Cell_Junction_Signaling	0.32685829261282
Triacylglycerol_Biosynthesis	Thrombin_Signaling	0.32685829261282
Wnt/_-catenin_Signaling	IL-8_Signaling	0.326877649610569
Wnt/_-catenin_Signaling	tRNA_Charging	0.326892593310504
Coagulation_System	Retinoate_Biosynthesis_I	0.326901311249137
Factors_Promoting_Cardiogenesis_in_Vertebrates	RhoA_Signaling	0.326905240969627
RhoA_Signaling	Glioblastoma_Multiforme_Signaling	0.326905240969627
RhoA_Signaling	ILK_Signaling	0.326905240969627
RhoA_Signaling	Signaling_by_Rho_Family_GTPases	0.326905240969627
RhoA_Signaling	RAR_Activation	0.326905240969627
RhoA_Signaling	Integrin_Signaling	0.326905240969627
RhoA_Signaling	Agranulocyte_Adhesion_and_Diapedesis	0.326905240969627
RhoA_Signaling	Regulation_of_Actin-based_Motility_by_Rho	0.326905240969627
Assembly_of_RNA_Polymerase_II_Complex	Ephrin_Receptor_Signaling	0.326915113871636
HIF1__Signaling	Nitric_Oxide_Signaling_in_the_Cardiovascular_System	0.32692152917505
Bladder_Cancer_Signaling	Nitric_Oxide_Signaling_in_the_Cardiovascular_System	0.32692152917505
Eicosanoid_Signaling	Prolactin_Signaling	0.326922966369646
Ethanol_Degradation_II	Prolactin_Signaling	0.326922966369646
Noradrenaline_and_Adrenaline_Degradation	Prolactin_Signaling	0.326922966369646
Role_of_JAK2_in_Hormone-like_Cytokine_Signaling	Prolactin_Signaling	0.326922966369646
Triacylglycerol_Degradation	Prolactin_Signaling	0.326922966369646
Prolactin_Signaling	Human_Embryonic_Stem_Cell_Pluripotency	0.326922966369646
Prolactin_Signaling	p38_MAPK_Signaling	0.326922966369646
Axonal_Guidance_Signaling	CD28_Signaling_in_T_Helper_Cells	0.326940691769666
Axonal_Guidance_Signaling	Antioxidant_Action_of_Vitamin_C	0.326940691769666
Cell_Cycle:_G2/M_DNA_Damage_Checkpoint_Regulation	Thyroid_Cancer_Signaling	0.326948356807512
Cellular_Effects_of_Sildenafil_(Viagra)	Role_of_Macrophages,_Fibroblasts_and_Endothelial_Cells_in_Rheumatoid_Arthritis	0.326961770623742
CDK5_Signaling	Prolactin_Signaling	0.326983328542685
Prolactin_Signaling	Fatty_Acid__-oxidation	0.326983328542685
Prolactin_Signaling	Histamine_Degradation	0.326983328542685
Tryptophan_Degradation_X_(Mammalian,_via_Tryptamine)	IL-8_Signaling	0.326985723867012
tRNA_Charging	EIF2_Signaling	0.327002442002442
Putrescine_Degradation_III	IL-8_Signaling	0.327019258407588
RhoA_Signaling	Calcium_Signaling	0.327019258407588
RhoA_Signaling	IL-6_Signaling	0.327019258407588
Oxidative_Ethanol_Degradation_III	IL-8_Signaling	0.327019258407588
Ethanol_Degradation_IV	IL-8_Signaling	0.327019258407588
Basal_Cell_Carcinoma_Signaling	IL-8_Signaling	0.327032672223819
HIF1__Signaling	Ephrin_Receptor_Signaling	0.327035546613011
Ephrin_Receptor_Signaling	Bladder_Cancer_Signaling	0.327035546613011
Axonal_Guidance_Signaling	Colorectal_Cancer_Metastasis_Signaling	0.327041295391396
Axonal_Guidance_Signaling	Sertoli_Cell-Sertoli_Cell_Junction_Signaling	0.327041295391396
Axonal_Guidance_Signaling	Thrombin_Signaling	0.327041295391396
Calcium_Signaling	Role_of_Osteoblasts,_Osteoclasts_and_Chondrocytes_in_Rheumatoid_Arthritis	0.327052792948165
Role_of_Osteoblasts,_Osteoclasts_and_Chondrocytes_in_Rheumatoid_Arthritis	IL-6_Signaling	0.327052792948165
Granzyme_A_Signaling	Prolactin_Signaling	0.327070518348184
Estrogen-mediated_S-phase_Entry	IL-8_Signaling	0.327093034396857
Nitric_Oxide_Signaling_in_the_Cardiovascular_System	CDK5_Signaling	0.327106448213088
Nitric_Oxide_Signaling_in_the_Cardiovascular_System	Fatty_Acid__-oxidation	0.327106448213088
Nitric_Oxide_Signaling_in_the_Cardiovascular_System	Histamine_Degradation	0.327106448213088
LPS/IL-1_Mediated_Inhibition_of_RXR_Function	Tight_Junction_Signaling	0.327124183006536
Germ_Cell-Sertoli_Cell_Junction_Signaling	IL-8_Signaling	0.327130401456357
Cell_Cycle:_G2/M_DNA_Damage_Checkpoint_Regulation	Dendritic_Cell_Maturation	0.327136150234742
Eicosanoid_Signaling	Nitric_Oxide_Signaling_in_the_Cardiovascular_System	0.32714668966178
Ethanol_Degradation_II	Nitric_Oxide_Signaling_in_the_Cardiovascular_System	0.32714668966178
Noradrenaline_and_Adrenaline_Degradation	Nitric_Oxide_Signaling_in_the_Cardiovascular_System	0.32714668966178
Role_of_JAK2_in_Hormone-like_Cytokine_Signaling	Nitric_Oxide_Signaling_in_the_Cardiovascular_System	0.32714668966178
Nitric_Oxide_Signaling_in_the_Cardiovascular_System	Triacylglycerol_Degradation	0.32714668966178
Nitric_Oxide_Signaling_in_the_Cardiovascular_System	Human_Embryonic_Stem_Cell_Pluripotency	0.32714668966178
Nitric_Oxide_Signaling_in_the_Cardiovascular_System	p38_MAPK_Signaling	0.32714668966178
tRNA_Charging	Tryptophan_Degradation_X_(Mammalian,_via_Tryptamine)	0.327155190434383
Ephrin_Receptor_Signaling	Eicosanoid_Signaling	0.327160103478011
Ephrin_Receptor_Signaling	Ethanol_Degradation_II	0.327160103478011
Ephrin_Receptor_Signaling	Noradrenaline_and_Adrenaline_Degradation	0.327160103478011
Ephrin_Receptor_Signaling	Role_of_JAK2_in_Hormone-like_Cytokine_Signaling	0.327160103478011
Ephrin_Receptor_Signaling	Triacylglycerol_Degradation	0.327160103478011
Ephrin_Receptor_Signaling	Human_Embryonic_Stem_Cell_Pluripotency	0.327160103478011
Ephrin_Receptor_Signaling	p38_MAPK_Signaling	0.327160103478011
Triacylglycerol_Biosynthesis	IL-8_Signaling	0.327160103478011
Retinoate_Biosynthesis_I	Dendritic_Cell_Maturation	0.327169684775319
Cell_Cycle:_G2/M_DNA_Damage_Checkpoint_Regulation	Estrogen_Receptor_Signaling	0.327191166321601
tRNA_Charging	Putrescine_Degradation_III	0.327191772231281
tRNA_Charging	Oxidative_Ethanol_Degradation_III	0.327191772231281
tRNA_Charging	Ethanol_Degradation_IV	0.327191772231281
Nitric_Oxide_Signaling_in_the_Cardiovascular_System	Granzyme_A_Signaling	0.327193638018588
Factors_Promoting_Cardiogenesis_in_Vertebrates	Estrogen-mediated_S-phase_Entry	0.327202011239278
Estrogen-mediated_S-phase_Entry	Glioblastoma_Multiforme_Signaling	0.327202011239278
Estrogen-mediated_S-phase_Entry	ILK_Signaling	0.327202011239278
Estrogen-mediated_S-phase_Entry	Signaling_by_Rho_Family_GTPases	0.327202011239278
Estrogen-mediated_S-phase_Entry	RAR_Activation	0.327202011239278
Estrogen-mediated_S-phase_Entry	Integrin_Signaling	0.327202011239278
Estrogen-mediated_S-phase_Entry	Agranulocyte_Adhesion_and_Diapedesis	0.327202011239278
Estrogen-mediated_S-phase_Entry	Regulation_of_Actin-based_Motility_by_Rho	0.327202011239278
Ephrin_Receptor_Signaling	Fatty_Acid__-oxidation	0.327220465651049
Ephrin_Receptor_Signaling	Histamine_Degradation	0.327220465651049
Cell_Cycle:_G2/M_DNA_Damage_Checkpoint_Regulation	Estrogen-Dependent_Breast_Cancer_Signaling	0.327270288397049
Cell_Cycle:_G2/M_DNA_Damage_Checkpoint_Regulation	Coagulation_System	0.32728088336784
Prolactin_Signaling	CD28_Signaling_in_T_Helper_Cells	0.327285139407876
Prolactin_Signaling	Antioxidant_Action_of_Vitamin_C	0.327285139407876
Ephrin_Receptor_Signaling	Granzyme_A_Signaling	0.327307655456549
tRNA_Charging	Germ_Cell-Sertoli_Cell_Junction_Signaling	0.327313014758142
Assembly_of_RNA_Polymerase_II_Complex	Role_of_Osteoblasts,_Osteoclasts_and_Chondrocytes_in_Rheumatoid_Arthritis	0.327315389924086
Basal_Cell_Carcinoma_Signaling	Coagulation_System	0.327315389924086
Ephrin_Receptor_Signaling	CDK5_Signaling	0.32732106927278
Axonal_Guidance_Signaling	IL-8_Signaling	0.327343106256587
tRNA_Charging	Triacylglycerol_Biosynthesis	0.327345415778252
EIF2_Signaling	Coagulation_System	0.327349073957941
Prolactin_Signaling	Colorectal_Cancer_Metastasis_Signaling	0.327352208489029
Prolactin_Signaling	Sertoli_Cell-Sertoli_Cell_Junction_Signaling	0.327352208489029
Prolactin_Signaling	Thrombin_Signaling	0.327352208489029
Cell_Cycle:_G2/M_DNA_Damage_Checkpoint_Regulation	_-linolenate_Biosynthesis_II_(Animals)	0.327364185110664
Cell_Cycle:_G2/M_DNA_Damage_Checkpoint_Regulation	FXR/RXR_Activation	0.327364185110664
RhoA_Signaling	HIF1__Signaling	0.327370892018779
RhoA_Signaling	Bladder_Cancer_Signaling	0.327370892018779
HIF1__Signaling	Role_of_Osteoblasts,_Osteoclasts_and_Chondrocytes_in_Rheumatoid_Arthritis	0.327404426559356
Bladder_Cancer_Signaling	Role_of_Osteoblasts,_Osteoclasts_and_Chondrocytes_in_Rheumatoid_Arthritis	0.327404426559356
EIF2_Signaling	Estrogen_Receptor_Signaling	0.327404469250387
Putrescine_Degradation_III	Coagulation_System	0.327405106970324
Oxidative_Ethanol_Degradation_III	Coagulation_System	0.327405106970324
Ethanol_Degradation_IV	Coagulation_System	0.327405106970324
Nitric_Oxide_Signaling_in_the_Cardiovascular_System	CD28_Signaling_in_T_Helper_Cells	0.327408259078279
Nitric_Oxide_Signaling_in_the_Cardiovascular_System	Antioxidant_Action_of_Vitamin_C	0.327408259078279
EIF2_Signaling	Dendritic_Cell_Maturation	0.327415966386555
Calcium_Signaling	Estrogen-mediated_S-phase_Entry	0.327422853199251
Estrogen-mediated_S-phase_Entry	IL-6_Signaling	0.327422853199251
Wnt/_-catenin_Signaling	Coagulation_System	0.327458084683149
RhoA_Signaling	Eicosanoid_Signaling	0.327461914343202
RhoA_Signaling	Ethanol_Degradation_II	0.327461914343202
RhoA_Signaling	Noradrenaline_and_Adrenaline_Degradation	0.327461914343202
RhoA_Signaling	Role_of_JAK2_in_Hormone-like_Cytokine_Signaling	0.327461914343202
RhoA_Signaling	Triacylglycerol_Degradation	0.327461914343202
RhoA_Signaling	Human_Embryonic_Stem_Cell_Pluripotency	0.327461914343202
RhoA_Signaling	p38_MAPK_Signaling	0.327461914343202
Nitric_Oxide_Signaling_in_the_Cardiovascular_System	Colorectal_Cancer_Metastasis_Signaling	0.327475328159433
Nitric_Oxide_Signaling_in_the_Cardiovascular_System	Sertoli_Cell-Sertoli_Cell_Junction_Signaling	0.327475328159433
Nitric_Oxide_Signaling_in_the_Cardiovascular_System	Thrombin_Signaling	0.327475328159433
Mitotic_Roles_of_Polo-Like_Kinase	Estrogen_Receptor_Signaling	0.32747723132969
Wnt/_-catenin_Signaling	Thyroid_Cancer_Signaling	0.327487922705314
Assembly_of_RNA_Polymerase_II_Complex	RhoA_Signaling	0.327494824016563
RhoA_Signaling	CDK5_Signaling	0.32752227651624
RhoA_Signaling	Fatty_Acid__-oxidation	0.32752227651624
RhoA_Signaling	Histamine_Degradation	0.32752227651624
Ephrin_Receptor_Signaling	CD28_Signaling_in_T_Helper_Cells	0.32752227651624
Ephrin_Receptor_Signaling	Antioxidant_Action_of_Vitamin_C	0.32752227651624
Basal_Cell_Carcinoma_Signaling	Thyroid_Cancer_Signaling	0.327525150905433
Coagulation_System	Tryptophan_Degradation_X_(Mammalian,_via_Tryptamine)	0.327529330572809
Factors_Promoting_Cardiogenesis_in_Vertebrates	Glioblastoma_Multiforme_Signaling	0.327549104148702
Factors_Promoting_Cardiogenesis_in_Vertebrates	ILK_Signaling	0.327549104148702
Factors_Promoting_Cardiogenesis_in_Vertebrates	Signaling_by_Rho_Family_GTPases	0.327549104148702
Factors_Promoting_Cardiogenesis_in_Vertebrates	RAR_Activation	0.327549104148702
Factors_Promoting_Cardiogenesis_in_Vertebrates	Integrin_Signaling	0.327549104148702
Factors_Promoting_Cardiogenesis_in_Vertebrates	Agranulocyte_Adhesion_and_Diapedesis	0.327549104148702
Factors_Promoting_Cardiogenesis_in_Vertebrates	Regulation_of_Actin-based_Motility_by_Rho	0.327549104148702
Glioblastoma_Multiforme_Signaling	ILK_Signaling	0.327549104148702
Glioblastoma_Multiforme_Signaling	Signaling_by_Rho_Family_GTPases	0.327549104148702
Glioblastoma_Multiforme_Signaling	RAR_Activation	0.327549104148702
Glioblastoma_Multiforme_Signaling	Integrin_Signaling	0.327549104148702
Glioblastoma_Multiforme_Signaling	Agranulocyte_Adhesion_and_Diapedesis	0.327549104148702
Glioblastoma_Multiforme_Signaling	Regulation_of_Actin-based_Motility_by_Rho	0.327549104148702
ILK_Signaling	Signaling_by_Rho_Family_GTPases	0.327549104148702
ILK_Signaling	RAR_Activation	0.327549104148702
ILK_Signaling	Integrin_Signaling	0.327549104148702
ILK_Signaling	Agranulocyte_Adhesion_and_Diapedesis	0.327549104148702
ILK_Signaling	Regulation_of_Actin-based_Motility_by_Rho	0.327549104148702
Signaling_by_Rho_Family_GTPases	RAR_Activation	0.327549104148702
Signaling_by_Rho_Family_GTPases	Integrin_Signaling	0.327549104148702
Signaling_by_Rho_Family_GTPases	Agranulocyte_Adhesion_and_Diapedesis	0.327549104148702
Signaling_by_Rho_Family_GTPases	Regulation_of_Actin-based_Motility_by_Rho	0.327549104148702
RAR_Activation	Integrin_Signaling	0.327549104148702
RAR_Activation	Agranulocyte_Adhesion_and_Diapedesis	0.327549104148702
RAR_Activation	Regulation_of_Actin-based_Motility_by_Rho	0.327549104148702
Integrin_Signaling	Agranulocyte_Adhesion_and_Diapedesis	0.327549104148702
Integrin_Signaling	Regulation_of_Actin-based_Motility_by_Rho	0.327549104148702
Agranulocyte_Adhesion_and_Diapedesis	Regulation_of_Actin-based_Motility_by_Rho	0.327549104148702
Role_of_Osteoblasts,_Osteoclasts_and_Chondrocytes_in_Rheumatoid_Arthritis	CDK5_Signaling	0.327555811056817
Basal_Cell_Carcinoma_Signaling	Dendritic_Cell_Maturation	0.32757209926224
Assembly_of_RNA_Polymerase_II_Complex	Retinoate_Biosynthesis_I	0.327577639751553
Tryptophan_Degradation_X_(Mammalian,_via_Tryptamine)	Thyroid_Cancer_Signaling	0.327578806170355
Retinoate_Biosynthesis_I	Thyroid_Cancer_Signaling	0.327585513078471
Eicosanoid_Signaling	Role_of_Osteoblasts,_Osteoclasts_and_Chondrocytes_in_Rheumatoid_Arthritis	0.327596052505509
Ethanol_Degradation_II	Role_of_Osteoblasts,_Osteoclasts_and_Chondrocytes_in_Rheumatoid_Arthritis	0.327596052505509
Role_of_Osteoblasts,_Osteoclasts_and_Chondrocytes_in_Rheumatoid_Arthritis	Noradrenaline_and_Adrenaline_Degradation	0.327596052505509
Role_of_Osteoblasts,_Osteoclasts_and_Chondrocytes_in_Rheumatoid_Arthritis	Role_of_JAK2_in_Hormone-like_Cytokine_Signaling	0.327596052505509
Role_of_Osteoblasts,_Osteoclasts_and_Chondrocytes_in_Rheumatoid_Arthritis	Triacylglycerol_Degradation	0.327596052505509
Role_of_Osteoblasts,_Osteoclasts_and_Chondrocytes_in_Rheumatoid_Arthritis	Human_Embryonic_Stem_Cell_Pluripotency	0.327596052505509
Role_of_Osteoblasts,_Osteoclasts_and_Chondrocytes_in_Rheumatoid_Arthritis	p38_MAPK_Signaling	0.327596052505509
EIF2_Signaling	Estrogen-Dependent_Breast_Cancer_Signaling	0.327604737547193
RhoA_Signaling	Granzyme_A_Signaling	0.32760946632174
Wnt/_-catenin_Signaling	Dendritic_Cell_Maturation	0.327612146307798
Putrescine_Degradation_III	Thyroid_Cancer_Signaling	0.327612340710932
Oxidative_Ethanol_Degradation_III	Thyroid_Cancer_Signaling	0.327612340710932
Ethanol_Degradation_IV	Thyroid_Cancer_Signaling	0.327612340710932
Assembly_of_RNA_Polymerase_II_Complex	Estrogen-mediated_S-phase_Entry	0.327614379084967
tRNA_Charging	Axonal_Guidance_Signaling	0.32761821146369
Retinoate_Biosynthesis_I	_-linolenate_Biosynthesis_II_(Animals)	0.327639168343394
Retinoate_Biosynthesis_I	FXR/RXR_Activation	0.327639168343394
Role_of_Osteoblasts,_Osteoclasts_and_Chondrocytes_in_Rheumatoid_Arthritis	Granzyme_A_Signaling	0.327643000862317
Cell_Cycle:_G2/M_DNA_Damage_Checkpoint_Regulation	Role_of_Macrophages,_Fibroblasts_and_Endothelial_Cells_in_Rheumatoid_Arthritis	0.327645875251509
Prolactin_Signaling	IL-8_Signaling	0.327654019354221
Role_of_Osteoblasts,_Osteoclasts_and_Chondrocytes_in_Rheumatoid_Arthritis	Fatty_Acid__-oxidation	0.327656414678548
Role_of_Osteoblasts,_Osteoclasts_and_Chondrocytes_in_Rheumatoid_Arthritis	Histamine_Degradation	0.327656414678548
Putrescine_Degradation_III	Dendritic_Cell_Maturation	0.32765928906774
Oxidative_Ethanol_Degradation_III	Dendritic_Cell_Maturation	0.32765928906774
Ethanol_Degradation_IV	Dendritic_Cell_Maturation	0.32765928906774
Factors_Promoting_Cardiogenesis_in_Vertebrates	Calcium_Signaling	0.327663121586663
Factors_Promoting_Cardiogenesis_in_Vertebrates	IL-6_Signaling	0.327663121586663
Calcium_Signaling	Glioblastoma_Multiforme_Signaling	0.327663121586663
Calcium_Signaling	ILK_Signaling	0.327663121586663
Calcium_Signaling	Signaling_by_Rho_Family_GTPases	0.327663121586663
Calcium_Signaling	RAR_Activation	0.327663121586663
Calcium_Signaling	Integrin_Signaling	0.327663121586663
Calcium_Signaling	Agranulocyte_Adhesion_and_Diapedesis	0.327663121586663
Calcium_Signaling	Regulation_of_Actin-based_Motility_by_Rho	0.327663121586663
Glioblastoma_Multiforme_Signaling	IL-6_Signaling	0.327663121586663
ILK_Signaling	IL-6_Signaling	0.327663121586663
Signaling_by_Rho_Family_GTPases	IL-6_Signaling	0.327663121586663
RAR_Activation	IL-6_Signaling	0.327663121586663
Integrin_Signaling	IL-6_Signaling	0.327663121586663
Agranulocyte_Adhesion_and_Diapedesis	IL-6_Signaling	0.327663121586663
IL-6_Signaling	Regulation_of_Actin-based_Motility_by_Rho	0.327663121586663
Tryptophan_Degradation_X_(Mammalian,_via_Tryptamine)	Dendritic_Cell_Maturation	0.327679409792086
Ephrin_Receptor_Signaling	Colorectal_Cancer_Metastasis_Signaling	0.327689949219124
Ephrin_Receptor_Signaling	Sertoli_Cell-Sertoli_Cell_Junction_Signaling	0.327689949219124
Ephrin_Receptor_Signaling	Thrombin_Signaling	0.327689949219124
Estrogen-mediated_S-phase_Entry	HIF1__Signaling	0.327694962042788
Estrogen-mediated_S-phase_Entry	Bladder_Cancer_Signaling	0.327694962042788
Coagulation_System	Axonal_Guidance_Signaling	0.327703835157251
Coagulation_System	Triacylglycerol_Biosynthesis	0.327708764665286
Salvage_Pathways_of_Pyrimidine_Deoxyribonucleotides	Cellular_Effects_of_Sildenafil_(Viagra)	0.327716364323507
tRNA_Charging	Basal_Cell_Carcinoma_Signaling	0.32771855010661
Germ_Cell-Sertoli_Cell_Junction_Signaling	Thyroid_Cancer_Signaling	0.327723483759701
Cellular_Effects_of_Sildenafil_(Viagra)	HMGB1_Signaling	0.327746478873239
Triacylglycerol_Biosynthesis	Thyroid_Cancer_Signaling	0.327753185781355
Tight_Junction_Signaling	Molecular_Mechanisms_of_Cancer	0.327763975155279
Nitric_Oxide_Signaling_in_the_Cardiovascular_System	IL-8_Signaling	0.327777139024624
Salvage_Pathways_of_Pyrimidine_Deoxyribonucleotides	Role_of_BRCA1_in_DNA_Damage_Response	0.327779078844653
EIF2_Signaling	_-linolenate_Biosynthesis_II_(Animals)	0.327782344821987
EIF2_Signaling	FXR/RXR_Activation	0.327782344821987
Wnt/_-catenin_Signaling	Estrogen_Receptor_Signaling	0.327813299232737
Assembly_of_RNA_Polymerase_II_Complex	Thyroid_Cancer_Signaling	0.327813547954393
Role_of_BRCA1_in_DNA_Damage_Response	LPS/IL-1_Mediated_Inhibition_of_RXR_Function	0.32781977558097
Coagulation_System	Germ_Cell-Sertoli_Cell_Junction_Signaling	0.327826086956522
Retinoate_Biosynthesis_I	Role_of_Macrophages,_Fibroblasts_and_Endothelial_Cells_in_Rheumatoid_Arthritis	0.327833668678739
Role_of_Osteoblasts,_Osteoclasts_and_Chondrocytes_in_Rheumatoid_Arthritis	CD28_Signaling_in_T_Helper_Cells	0.327837501197662
Role_of_Osteoblasts,_Osteoclasts_and_Chondrocytes_in_Rheumatoid_Arthritis	Antioxidant_Action_of_Vitamin_C	0.327837501197662
Triacylglycerol_Biosynthesis	Dendritic_Cell_Maturation	0.327853789403085
Wnt/_-catenin_Signaling	Estrogen-Dependent_Breast_Cancer_Signaling	0.327874396135266
Basal_Cell_Carcinoma_Signaling	Estrogen_Receptor_Signaling	0.327874396135266
Estrogen-mediated_S-phase_Entry	Eicosanoid_Signaling	0.327878339741694
Estrogen-mediated_S-phase_Entry	Ethanol_Degradation_II	0.327878339741694
Estrogen-mediated_S-phase_Entry	Noradrenaline_and_Adrenaline_Degradation	0.327878339741694
Estrogen-mediated_S-phase_Entry	Role_of_JAK2_in_Hormone-like_Cytokine_Signaling	0.327878339741694
Estrogen-mediated_S-phase_Entry	Triacylglycerol_Degradation	0.327878339741694
Estrogen-mediated_S-phase_Entry	Human_Embryonic_Stem_Cell_Pluripotency	0.327878339741694
Estrogen-mediated_S-phase_Entry	p38_MAPK_Signaling	0.327878339741694
Germ_Cell-Sertoli_Cell_Junction_Signaling	Dendritic_Cell_Maturation	0.327880617035547
Axonal_Guidance_Signaling	Thyroid_Cancer_Signaling	0.327882533295008
tRNA_Charging	Prolactin_Signaling	0.327884213386847
Cellular_Effects_of_Sildenafil_(Viagra)	Acute_Phase_Response_Signaling	0.327888198757764
RhoA_Signaling	Colorectal_Cancer_Metastasis_Signaling	0.327891156462585
RhoA_Signaling	Sertoli_Cell-Sertoli_Cell_Junction_Signaling	0.327891156462585
RhoA_Signaling	Thrombin_Signaling	0.327891156462585
Basal_Cell_Carcinoma_Signaling	Estrogen-Dependent_Breast_Cancer_Signaling	0.327900737759893
Retinoate_Biosynthesis_I	Estrogen-Dependent_Breast_Cancer_Signaling	0.327920858484239
RhoA_Signaling	CD28_Signaling_in_T_Helper_Cells	0.327924691003162
RhoA_Signaling	Antioxidant_Action_of_Vitamin_C	0.327924691003162
Role_of_Osteoblasts,_Osteoclasts_and_Chondrocytes_in_Rheumatoid_Arthritis	Colorectal_Cancer_Metastasis_Signaling	0.327924691003162
Role_of_Osteoblasts,_Osteoclasts_and_Chondrocytes_in_Rheumatoid_Arthritis	Sertoli_Cell-Sertoli_Cell_Junction_Signaling	0.327924691003162
Role_of_Osteoblasts,_Osteoclasts_and_Chondrocytes_in_Rheumatoid_Arthritis	Thrombin_Signaling	0.327924691003162
Tryptophan_Degradation_X_(Mammalian,_via_Tryptamine)	Estrogen_Receptor_Signaling	0.327929606625259
EIF2_Signaling	Role_of_Macrophages,_Fibroblasts_and_Endothelial_Cells_in_Rheumatoid_Arthritis	0.327931534932814
Estrogen-mediated_S-phase_Entry	Granzyme_A_Signaling	0.327940451542936
Estrogen-mediated_S-phase_Entry	Fatty_Acid__-oxidation	0.327940451542936
Estrogen-mediated_S-phase_Entry	Histamine_Degradation	0.327940451542936
Assembly_of_RNA_Polymerase_II_Complex	Factors_Promoting_Cardiogenesis_in_Vertebrates	0.327943409247757
Assembly_of_RNA_Polymerase_II_Complex	Glioblastoma_Multiforme_Signaling	0.327943409247757
Assembly_of_RNA_Polymerase_II_Complex	ILK_Signaling	0.327943409247757
Assembly_of_RNA_Polymerase_II_Complex	Signaling_by_Rho_Family_GTPases	0.327943409247757
Assembly_of_RNA_Polymerase_II_Complex	RAR_Activation	0.327943409247757
Assembly_of_RNA_Polymerase_II_Complex	Integrin_Signaling	0.327943409247757
Assembly_of_RNA_Polymerase_II_Complex	Agranulocyte_Adhesion_and_Diapedesis	0.327943409247757
Assembly_of_RNA_Polymerase_II_Complex	Regulation_of_Actin-based_Motility_by_Rho	0.327943409247757
Axonal_Guidance_Signaling	Dendritic_Cell_Maturation	0.327949602376162
Wnt/_-catenin_Signaling	_-linolenate_Biosynthesis_II_(Animals)	0.327950310559006
Wnt/_-catenin_Signaling	FXR/RXR_Activation	0.327950310559006
Tryptophan_Degradation_X_(Mammalian,_via_Tryptamine)	Estrogen-Dependent_Breast_Cancer_Signaling	0.327954393024816
Putrescine_Degradation_III	Estrogen_Receptor_Signaling	0.327964113181504
Oxidative_Ethanol_Degradation_III	Estrogen_Receptor_Signaling	0.327964113181504
Ethanol_Degradation_IV	Estrogen_Receptor_Signaling	0.327964113181504
Basal_Cell_Carcinoma_Signaling	_-linolenate_Biosynthesis_II_(Animals)	0.327974513749162
Basal_Cell_Carcinoma_Signaling	FXR/RXR_Activation	0.327974513749162
Calcium_Signaling	IL-6_Signaling	0.327978346268085
Putrescine_Degradation_III	Estrogen-Dependent_Breast_Cancer_Signaling	0.327987927565392
Oxidative_Ethanol_Degradation_III	Estrogen-Dependent_Breast_Cancer_Signaling	0.327987927565392
Ethanol_Degradation_IV	Estrogen-Dependent_Breast_Cancer_Signaling	0.327987927565392
Ephrin_Receptor_Signaling	IL-8_Signaling	0.327991760084315
Tryptophan_Degradation_X_(Mammalian,_via_Tryptamine)	_-linolenate_Biosynthesis_II_(Animals)	0.328008048289738
Tryptophan_Degradation_X_(Mammalian,_via_Tryptamine)	FXR/RXR_Activation	0.328008048289738
Factors_Promoting_Cardiogenesis_in_Vertebrates	HIF1__Signaling	0.328014755197854
Factors_Promoting_Cardiogenesis_in_Vertebrates	Bladder_Cancer_Signaling	0.328014755197854
HIF1__Signaling	Glioblastoma_Multiforme_Signaling	0.328014755197854
HIF1__Signaling	ILK_Signaling	0.328014755197854
HIF1__Signaling	Signaling_by_Rho_Family_GTPases	0.328014755197854
HIF1__Signaling	RAR_Activation	0.328014755197854
HIF1__Signaling	Integrin_Signaling	0.328014755197854
HIF1__Signaling	Agranulocyte_Adhesion_and_Diapedesis	0.328014755197854
HIF1__Signaling	Regulation_of_Actin-based_Motility_by_Rho	0.328014755197854
Glioblastoma_Multiforme_Signaling	Bladder_Cancer_Signaling	0.328014755197854
ILK_Signaling	Bladder_Cancer_Signaling	0.328014755197854
Bladder_Cancer_Signaling	Signaling_by_Rho_Family_GTPases	0.328014755197854
Bladder_Cancer_Signaling	RAR_Activation	0.328014755197854
Bladder_Cancer_Signaling	Integrin_Signaling	0.328014755197854
Bladder_Cancer_Signaling	Agranulocyte_Adhesion_and_Diapedesis	0.328014755197854
Bladder_Cancer_Signaling	Regulation_of_Actin-based_Motility_by_Rho	0.328014755197854
tRNA_Charging	Nitric_Oxide_Signaling_in_the_Cardiovascular_System	0.328018520841172
Coagulation_System	Prolactin_Signaling	0.328058266784975
Putrescine_Degradation_III	_-linolenate_Biosynthesis_II_(Animals)	0.328061703554661
Putrescine_Degradation_III	FXR/RXR_Activation	0.328061703554661
Oxidative_Ethanol_Degradation_III	_-linolenate_Biosynthesis_II_(Animals)	0.328061703554661
Oxidative_Ethanol_Degradation_III	FXR/RXR_Activation	0.328061703554661
Ethanol_Degradation_IV	_-linolenate_Biosynthesis_II_(Animals)	0.328061703554661
Ethanol_Degradation_IV	FXR/RXR_Activation	0.328061703554661
Factors_Promoting_Cardiogenesis_in_Vertebrates	Eicosanoid_Signaling	0.328105777522277
Factors_Promoting_Cardiogenesis_in_Vertebrates	Ethanol_Degradation_II	0.328105777522277
Factors_Promoting_Cardiogenesis_in_Vertebrates	Noradrenaline_and_Adrenaline_Degradation	0.328105777522277
Factors_Promoting_Cardiogenesis_in_Vertebrates	Role_of_JAK2_in_Hormone-like_Cytokine_Signaling	0.328105777522277
Factors_Promoting_Cardiogenesis_in_Vertebrates	Triacylglycerol_Degradation	0.328105777522277
Factors_Promoting_Cardiogenesis_in_Vertebrates	Human_Embryonic_Stem_Cell_Pluripotency	0.328105777522277
Factors_Promoting_Cardiogenesis_in_Vertebrates	p38_MAPK_Signaling	0.328105777522277
Glioblastoma_Multiforme_Signaling	Eicosanoid_Signaling	0.328105777522277
Glioblastoma_Multiforme_Signaling	Ethanol_Degradation_II	0.328105777522277
Glioblastoma_Multiforme_Signaling	Noradrenaline_and_Adrenaline_Degradation	0.328105777522277
Glioblastoma_Multiforme_Signaling	Role_of_JAK2_in_Hormone-like_Cytokine_Signaling	0.328105777522277
Glioblastoma_Multiforme_Signaling	Triacylglycerol_Degradation	0.328105777522277
Glioblastoma_Multiforme_Signaling	Human_Embryonic_Stem_Cell_Pluripotency	0.328105777522277
Glioblastoma_Multiforme_Signaling	p38_MAPK_Signaling	0.328105777522277
ILK_Signaling	Eicosanoid_Signaling	0.328105777522277
ILK_Signaling	Ethanol_Degradation_II	0.328105777522277
ILK_Signaling	Noradrenaline_and_Adrenaline_Degradation	0.328105777522277
ILK_Signaling	Role_of_JAK2_in_Hormone-like_Cytokine_Signaling	0.328105777522277
ILK_Signaling	Triacylglycerol_Degradation	0.328105777522277
ILK_Signaling	Human_Embryonic_Stem_Cell_Pluripotency	0.328105777522277
ILK_Signaling	p38_MAPK_Signaling	0.328105777522277
Eicosanoid_Signaling	Signaling_by_Rho_Family_GTPases	0.328105777522277
Eicosanoid_Signaling	RAR_Activation	0.328105777522277
Eicosanoid_Signaling	Integrin_Signaling	0.328105777522277
Eicosanoid_Signaling	Agranulocyte_Adhesion_and_Diapedesis	0.328105777522277
Eicosanoid_Signaling	Regulation_of_Actin-based_Motility_by_Rho	0.328105777522277
Ethanol_Degradation_II	Signaling_by_Rho_Family_GTPases	0.328105777522277
Ethanol_Degradation_II	RAR_Activation	0.328105777522277
Ethanol_Degradation_II	Integrin_Signaling	0.328105777522277
Ethanol_Degradation_II	Agranulocyte_Adhesion_and_Diapedesis	0.328105777522277
Ethanol_Degradation_II	Regulation_of_Actin-based_Motility_by_Rho	0.328105777522277
Signaling_by_Rho_Family_GTPases	Noradrenaline_and_Adrenaline_Degradation	0.328105777522277
Signaling_by_Rho_Family_GTPases	Role_of_JAK2_in_Hormone-like_Cytokine_Signaling	0.328105777522277
Signaling_by_Rho_Family_GTPases	Triacylglycerol_Degradation	0.328105777522277
Signaling_by_Rho_Family_GTPases	Human_Embryonic_Stem_Cell_Pluripotency	0.328105777522277
Signaling_by_Rho_Family_GTPases	p38_MAPK_Signaling	0.328105777522277
Noradrenaline_and_Adrenaline_Degradation	RAR_Activation	0.328105777522277
Noradrenaline_and_Adrenaline_Degradation	Integrin_Signaling	0.328105777522277
Noradrenaline_and_Adrenaline_Degradation	Agranulocyte_Adhesion_and_Diapedesis	0.328105777522277
Noradrenaline_and_Adrenaline_Degradation	Regulation_of_Actin-based_Motility_by_Rho	0.328105777522277
RAR_Activation	Role_of_JAK2_in_Hormone-like_Cytokine_Signaling	0.328105777522277
RAR_Activation	Triacylglycerol_Degradation	0.328105777522277
RAR_Activation	Human_Embryonic_Stem_Cell_Pluripotency	0.328105777522277
RAR_Activation	p38_MAPK_Signaling	0.328105777522277
Role_of_JAK2_in_Hormone-like_Cytokine_Signaling	Integrin_Signaling	0.328105777522277
Role_of_JAK2_in_Hormone-like_Cytokine_Signaling	Agranulocyte_Adhesion_and_Diapedesis	0.328105777522277
Role_of_JAK2_in_Hormone-like_Cytokine_Signaling	Regulation_of_Actin-based_Motility_by_Rho	0.328105777522277
Integrin_Signaling	Triacylglycerol_Degradation	0.328105777522277
Integrin_Signaling	Human_Embryonic_Stem_Cell_Pluripotency	0.328105777522277
Integrin_Signaling	p38_MAPK_Signaling	0.328105777522277
Triacylglycerol_Degradation	Agranulocyte_Adhesion_and_Diapedesis	0.328105777522277
Triacylglycerol_Degradation	Regulation_of_Actin-based_Motility_by_Rho	0.328105777522277
Agranulocyte_Adhesion_and_Diapedesis	Human_Embryonic_Stem_Cell_Pluripotency	0.328105777522277
Agranulocyte_Adhesion_and_Diapedesis	p38_MAPK_Signaling	0.328105777522277
Human_Embryonic_Stem_Cell_Pluripotency	Regulation_of_Actin-based_Motility_by_Rho	0.328105777522277
p38_MAPK_Signaling	Regulation_of_Actin-based_Motility_by_Rho	0.328105777522277
Assembly_of_RNA_Polymerase_II_Complex	Calcium_Signaling	0.328109040717736
Assembly_of_RNA_Polymerase_II_Complex	IL-6_Signaling	0.328109040717736
Estrogen_Receptor_Signaling	Triacylglycerol_Biosynthesis	0.328109040717736
Triacylglycerol_Biosynthesis	Estrogen-Dependent_Breast_Cancer_Signaling	0.328128772635815
Salvage_Pathways_of_Pyrimidine_Deoxyribonucleotides	EIF2_Signaling	0.328143965148196
_-linolenate_Biosynthesis_II_(Animals)	Germ_Cell-Sertoli_Cell_Junction_Signaling	0.328152725879084
Germ_Cell-Sertoli_Cell_Junction_Signaling	FXR/RXR_Activation	0.328152725879084
Factors_Promoting_Cardiogenesis_in_Vertebrates	CDK5_Signaling	0.328166139695315
Factors_Promoting_Cardiogenesis_in_Vertebrates	Fatty_Acid__-oxidation	0.328166139695315
Factors_Promoting_Cardiogenesis_in_Vertebrates	Histamine_Degradation	0.328166139695315
Glioblastoma_Multiforme_Signaling	CDK5_Signaling	0.328166139695315
Glioblastoma_Multiforme_Signaling	Fatty_Acid__-oxidation	0.328166139695315
Glioblastoma_Multiforme_Signaling	Histamine_Degradation	0.328166139695315
ILK_Signaling	CDK5_Signaling	0.328166139695315
ILK_Signaling	Fatty_Acid__-oxidation	0.328166139695315
ILK_Signaling	Histamine_Degradation	0.328166139695315
Signaling_by_Rho_Family_GTPases	CDK5_Signaling	0.328166139695315
Signaling_by_Rho_Family_GTPases	Fatty_Acid__-oxidation	0.328166139695315
Signaling_by_Rho_Family_GTPases	Histamine_Degradation	0.328166139695315
RAR_Activation	CDK5_Signaling	0.328166139695315
RAR_Activation	Fatty_Acid__-oxidation	0.328166139695315
RAR_Activation	Histamine_Degradation	0.328166139695315
Integrin_Signaling	CDK5_Signaling	0.328166139695315
Integrin_Signaling	Fatty_Acid__-oxidation	0.328166139695315
Integrin_Signaling	Histamine_Degradation	0.328166139695315
CDK5_Signaling	Agranulocyte_Adhesion_and_Diapedesis	0.328166139695315
CDK5_Signaling	Regulation_of_Actin-based_Motility_by_Rho	0.328166139695315
Agranulocyte_Adhesion_and_Diapedesis	Fatty_Acid__-oxidation	0.328166139695315
Agranulocyte_Adhesion_and_Diapedesis	Histamine_Degradation	0.328166139695315
Fatty_Acid__-oxidation	Regulation_of_Actin-based_Motility_by_Rho	0.328166139695315
Histamine_Degradation	Regulation_of_Actin-based_Motility_by_Rho	0.328166139695315
_-linolenate_Biosynthesis_II_(Animals)	Triacylglycerol_Biosynthesis	0.328182427900738
Triacylglycerol_Biosynthesis	FXR/RXR_Activation	0.328182427900738
Coagulation_System	Nitric_Oxide_Signaling_in_the_Cardiovascular_System	0.328184955141477
RhoA_Signaling	IL-8_Signaling	0.328192967327776
Calcium_Signaling	HIF1__Signaling	0.328195841716968
Calcium_Signaling	Bladder_Cancer_Signaling	0.328195841716968
HIF1__Signaling	IL-6_Signaling	0.328195841716968
Bladder_Cancer_Signaling	IL-6_Signaling	0.328195841716968
Role_of_Osteoblasts,_Osteoclasts_and_Chondrocytes_in_Rheumatoid_Arthritis	IL-8_Signaling	0.328226501868353
EIF2_Signaling	Thyroid_Cancer_Signaling	0.328229407705111
Wnt/_-catenin_Signaling	Role_of_Macrophages,_Fibroblasts_and_Endothelial_Cells_in_Rheumatoid_Arthritis	0.32824016563147
Prolactin_Signaling	Thyroid_Cancer_Signaling	0.328247101657564
Estrogen-mediated_S-phase_Entry	CD28_Signaling_in_T_Helper_Cells	0.328251010549147
Estrogen-mediated_S-phase_Entry	Antioxidant_Action_of_Vitamin_C	0.328251010549147
Factors_Promoting_Cardiogenesis_in_Vertebrates	Granzyme_A_Signaling	0.328253329500814
Glioblastoma_Multiforme_Signaling	Granzyme_A_Signaling	0.328253329500814
ILK_Signaling	Granzyme_A_Signaling	0.328253329500814
Signaling_by_Rho_Family_GTPases	Granzyme_A_Signaling	0.328253329500814
RAR_Activation	Granzyme_A_Signaling	0.328253329500814
Integrin_Signaling	Granzyme_A_Signaling	0.328253329500814
Granzyme_A_Signaling	Agranulocyte_Adhesion_and_Diapedesis	0.328253329500814
Granzyme_A_Signaling	Regulation_of_Actin-based_Motility_by_Rho	0.328253329500814
Basal_Cell_Carcinoma_Signaling	Role_of_Macrophages,_Fibroblasts_and_Endothelial_Cells_in_Rheumatoid_Arthritis	0.328256203890007
Tryptophan_Degradation_X_(Mammalian,_via_Tryptamine)	Role_of_Macrophages,_Fibroblasts_and_Endothelial_Cells_in_Rheumatoid_Arthritis	0.328289738430583
Role_of_BRCA1_in_DNA_Damage_Response	Molecular_Mechanisms_of_Cancer	0.328292361720808
Prolactin_Signaling	Dendritic_Cell_Maturation	0.328294050014372
Coagulation_System	Ephrin_Receptor_Signaling	0.328302277432712
Axonal_Guidance_Signaling	Estrogen-Dependent_Breast_Cancer_Signaling	0.328308421960333
Estrogen-mediated_S-phase_Entry	CDK5_Signaling	0.328320023661639
Estrogen-mediated_S-phase_Entry	Colorectal_Cancer_Metastasis_Signaling	0.328320023661639
Estrogen-mediated_S-phase_Entry	Sertoli_Cell-Sertoli_Cell_Junction_Signaling	0.328320023661639
Estrogen-mediated_S-phase_Entry	Thrombin_Signaling	0.328320023661639
Calcium_Signaling	Eicosanoid_Signaling	0.328320398581968
Calcium_Signaling	Ethanol_Degradation_II	0.328320398581968
Calcium_Signaling	Noradrenaline_and_Adrenaline_Degradation	0.328320398581968
Calcium_Signaling	Role_of_JAK2_in_Hormone-like_Cytokine_Signaling	0.328320398581968
Calcium_Signaling	Triacylglycerol_Degradation	0.328320398581968
Calcium_Signaling	Human_Embryonic_Stem_Cell_Pluripotency	0.328320398581968
Calcium_Signaling	p38_MAPK_Signaling	0.328320398581968
Eicosanoid_Signaling	IL-6_Signaling	0.328320398581968
Ethanol_Degradation_II	IL-6_Signaling	0.328320398581968
Noradrenaline_and_Adrenaline_Degradation	IL-6_Signaling	0.328320398581968
Role_of_JAK2_in_Hormone-like_Cytokine_Signaling	IL-6_Signaling	0.328320398581968
Triacylglycerol_Degradation	IL-6_Signaling	0.328320398581968
Human_Embryonic_Stem_Cell_Pluripotency	IL-6_Signaling	0.328320398581968
p38_MAPK_Signaling	IL-6_Signaling	0.328320398581968
Axonal_Guidance_Signaling	Estrogen_Receptor_Signaling	0.328338262841368
Putrescine_Degradation_III	Role_of_Macrophages,_Fibroblasts_and_Endothelial_Cells_in_Rheumatoid_Arthritis	0.328343393695506
Oxidative_Ethanol_Degradation_III	Role_of_Macrophages,_Fibroblasts_and_Endothelial_Cells_in_Rheumatoid_Arthritis	0.328343393695506
Ethanol_Degradation_IV	Role_of_Macrophages,_Fibroblasts_and_Endothelial_Cells_in_Rheumatoid_Arthritis	0.328343393695506
Nitric_Oxide_Signaling_in_the_Cardiovascular_System	Thyroid_Cancer_Signaling	0.328350100603622
Calcium_Signaling	CDK5_Signaling	0.328380760755006
Calcium_Signaling	Fatty_Acid__-oxidation	0.328380760755006
Calcium_Signaling	Histamine_Degradation	0.328380760755006
CDK5_Signaling	IL-6_Signaling	0.328380760755006
Fatty_Acid__-oxidation	IL-6_Signaling	0.328380760755006
Histamine_Degradation	IL-6_Signaling	0.328380760755006
_-linolenate_Biosynthesis_II_(Animals)	Axonal_Guidance_Signaling	0.328382197949602
Axonal_Guidance_Signaling	FXR/RXR_Activation	0.328382197949602
Cell_Cycle:_G2/M_DNA_Damage_Checkpoint_Regulation	HMGB1_Signaling	0.32841046277666
Nitric_Oxide_Signaling_in_the_Cardiovascular_System	Dendritic_Cell_Maturation	0.328417169684775
Germ_Cell-Sertoli_Cell_Junction_Signaling	Role_of_Macrophages,_Fibroblasts_and_Endothelial_Cells_in_Rheumatoid_Arthritis	0.328434416019929
Assembly_of_RNA_Polymerase_II_Complex	HIF1__Signaling	0.328436360051267
Assembly_of_RNA_Polymerase_II_Complex	Bladder_Cancer_Signaling	0.328436360051267
Ephrin_Receptor_Signaling	Thyroid_Cancer_Signaling	0.328464118041583
Triacylglycerol_Biosynthesis	Role_of_Macrophages,_Fibroblasts_and_Endothelial_Cells_in_Rheumatoid_Arthritis	0.328464118041583
Calcium_Signaling	Granzyme_A_Signaling	0.328467950560506
Granzyme_A_Signaling	IL-6_Signaling	0.328467950560506
tRNA_Charging	RhoA_Signaling	0.328472135122706
Factors_Promoting_Cardiogenesis_in_Vertebrates	CD28_Signaling_in_T_Helper_Cells	0.328501485101083
Factors_Promoting_Cardiogenesis_in_Vertebrates	Antioxidant_Action_of_Vitamin_C	0.328501485101083
Glioblastoma_Multiforme_Signaling	CD28_Signaling_in_T_Helper_Cells	0.328501485101083
Glioblastoma_Multiforme_Signaling	Antioxidant_Action_of_Vitamin_C	0.328501485101083
ILK_Signaling	CD28_Signaling_in_T_Helper_Cells	0.328501485101083
ILK_Signaling	Antioxidant_Action_of_Vitamin_C	0.328501485101083
Signaling_by_Rho_Family_GTPases	CD28_Signaling_in_T_Helper_Cells	0.328501485101083
Signaling_by_Rho_Family_GTPases	Antioxidant_Action_of_Vitamin_C	0.328501485101083
RAR_Activation	CD28_Signaling_in_T_Helper_Cells	0.328501485101083
RAR_Activation	Antioxidant_Action_of_Vitamin_C	0.328501485101083
Integrin_Signaling	CD28_Signaling_in_T_Helper_Cells	0.328501485101083
Integrin_Signaling	Antioxidant_Action_of_Vitamin_C	0.328501485101083
Agranulocyte_Adhesion_and_Diapedesis	CD28_Signaling_in_T_Helper_Cells	0.328501485101083
Agranulocyte_Adhesion_and_Diapedesis	Antioxidant_Action_of_Vitamin_C	0.328501485101083
CD28_Signaling_in_T_Helper_Cells	Regulation_of_Actin-based_Motility_by_Rho	0.328501485101083
Antioxidant_Action_of_Vitamin_C	Regulation_of_Actin-based_Motility_by_Rho	0.328501485101083
tRNA_Charging	Role_of_Osteoblasts,_Osteoclasts_and_Chondrocytes_in_Rheumatoid_Arthritis	0.328508716919604
Assembly_of_RNA_Polymerase_II_Complex	Eicosanoid_Signaling	0.328530020703934
Assembly_of_RNA_Polymerase_II_Complex	Ethanol_Degradation_II	0.328530020703934
Assembly_of_RNA_Polymerase_II_Complex	Noradrenaline_and_Adrenaline_Degradation	0.328530020703934
Assembly_of_RNA_Polymerase_II_Complex	Role_of_JAK2_in_Hormone-like_Cytokine_Signaling	0.328530020703934
Assembly_of_RNA_Polymerase_II_Complex	Triacylglycerol_Degradation	0.328530020703934
Assembly_of_RNA_Polymerase_II_Complex	Human_Embryonic_Stem_Cell_Pluripotency	0.328530020703934
Assembly_of_RNA_Polymerase_II_Complex	p38_MAPK_Signaling	0.328530020703934
Ephrin_Receptor_Signaling	Dendritic_Cell_Maturation	0.328531187122736
Factors_Promoting_Cardiogenesis_in_Vertebrates	Colorectal_Cancer_Metastasis_Signaling	0.328535019641659
Factors_Promoting_Cardiogenesis_in_Vertebrates	Sertoli_Cell-Sertoli_Cell_Junction_Signaling	0.328535019641659
Factors_Promoting_Cardiogenesis_in_Vertebrates	Thrombin_Signaling	0.328535019641659
Glioblastoma_Multiforme_Signaling	Colorectal_Cancer_Metastasis_Signaling	0.328535019641659
Glioblastoma_Multiforme_Signaling	Sertoli_Cell-Sertoli_Cell_Junction_Signaling	0.328535019641659
Glioblastoma_Multiforme_Signaling	Thrombin_Signaling	0.328535019641659
ILK_Signaling	Colorectal_Cancer_Metastasis_Signaling	0.328535019641659
ILK_Signaling	Sertoli_Cell-Sertoli_Cell_Junction_Signaling	0.328535019641659
ILK_Signaling	Thrombin_Signaling	0.328535019641659
Signaling_by_Rho_Family_GTPases	Colorectal_Cancer_Metastasis_Signaling	0.328535019641659
Signaling_by_Rho_Family_GTPases	Sertoli_Cell-Sertoli_Cell_Junction_Signaling	0.328535019641659
Signaling_by_Rho_Family_GTPases	Thrombin_Signaling	0.328535019641659
RAR_Activation	Colorectal_Cancer_Metastasis_Signaling	0.328535019641659
RAR_Activation	Sertoli_Cell-Sertoli_Cell_Junction_Signaling	0.328535019641659
RAR_Activation	Thrombin_Signaling	0.328535019641659
Integrin_Signaling	Colorectal_Cancer_Metastasis_Signaling	0.328535019641659
Integrin_Signaling	Sertoli_Cell-Sertoli_Cell_Junction_Signaling	0.328535019641659
Integrin_Signaling	Thrombin_Signaling	0.328535019641659
Agranulocyte_Adhesion_and_Diapedesis	Colorectal_Cancer_Metastasis_Signaling	0.328535019641659
Agranulocyte_Adhesion_and_Diapedesis	Sertoli_Cell-Sertoli_Cell_Junction_Signaling	0.328535019641659
Agranulocyte_Adhesion_and_Diapedesis	Thrombin_Signaling	0.328535019641659
Colorectal_Cancer_Metastasis_Signaling	Regulation_of_Actin-based_Motility_by_Rho	0.328535019641659
Regulation_of_Actin-based_Motility_by_Rho	Sertoli_Cell-Sertoli_Cell_Junction_Signaling	0.328535019641659
Regulation_of_Actin-based_Motility_by_Rho	Thrombin_Signaling	0.328535019641659
Acute_Phase_Response_Signaling	Cell_Cycle:_G2/M_DNA_Damage_Checkpoint_Regulation	0.328592132505176
Retinoate_Biosynthesis_I	HMGB1_Signaling	0.328604963112005
HIF1__Signaling	Bladder_Cancer_Signaling	0.328614544409313
HIF1__Signaling	Eicosanoid_Signaling	0.328618376928236
HIF1__Signaling	Ethanol_Degradation_II	0.328618376928236
HIF1__Signaling	Noradrenaline_and_Adrenaline_Degradation	0.328618376928236
HIF1__Signaling	Role_of_JAK2_in_Hormone-like_Cytokine_Signaling	0.328618376928236
HIF1__Signaling	Triacylglycerol_Degradation	0.328618376928236
HIF1__Signaling	Human_Embryonic_Stem_Cell_Pluripotency	0.328618376928236
HIF1__Signaling	p38_MAPK_Signaling	0.328618376928236
Bladder_Cancer_Signaling	Eicosanoid_Signaling	0.328618376928236
Bladder_Cancer_Signaling	Ethanol_Degradation_II	0.328618376928236
Bladder_Cancer_Signaling	Noradrenaline_and_Adrenaline_Degradation	0.328618376928236
Bladder_Cancer_Signaling	Role_of_JAK2_in_Hormone-like_Cytokine_Signaling	0.328618376928236
Bladder_Cancer_Signaling	Triacylglycerol_Degradation	0.328618376928236
Bladder_Cancer_Signaling	Human_Embryonic_Stem_Cell_Pluripotency	0.328618376928236
Bladder_Cancer_Signaling	p38_MAPK_Signaling	0.328618376928236
Assembly_of_RNA_Polymerase_II_Complex	CDK5_Signaling	0.328626639061422
Germ_Cell-Sertoli_Cell_Junction_Signaling	Estrogen-Dependent_Breast_Cancer_Signaling	0.328631790744467
Coagulation_System	Role_of_Osteoblasts,_Osteoclasts_and_Chondrocytes_in_Rheumatoid_Arthritis	0.328647342995169
Axonal_Guidance_Signaling	Role_of_Macrophages,_Fibroblasts_and_Endothelial_Cells_in_Rheumatoid_Arthritis	0.328663888090447
HIF1__Signaling	CDK5_Signaling	0.328678739101274
Bladder_Cancer_Signaling	CDK5_Signaling	0.328678739101274
Assembly_of_RNA_Polymerase_II_Complex	Granzyme_A_Signaling	0.328681849551415
Assembly_of_RNA_Polymerase_II_Complex	Fatty_Acid__-oxidation	0.328681849551415
Assembly_of_RNA_Polymerase_II_Complex	Histamine_Degradation	0.328681849551415
Calcium_Signaling	CD28_Signaling_in_T_Helper_Cells	0.328682571620197
Calcium_Signaling	Antioxidant_Action_of_Vitamin_C	0.328682571620197
CD28_Signaling_in_T_Helper_Cells	IL-6_Signaling	0.328682571620197
Antioxidant_Action_of_Vitamin_C	IL-6_Signaling	0.328682571620197
_-linolenate_Biosynthesis_II_(Animals)	Prolactin_Signaling	0.328696464501293
Prolactin_Signaling	FXR/RXR_Activation	0.328696464501293
HIF1__Signaling	Fatty_Acid__-oxidation	0.328732394366197
HIF1__Signaling	Histamine_Degradation	0.328732394366197
Bladder_Cancer_Signaling	Fatty_Acid__-oxidation	0.328732394366197
Bladder_Cancer_Signaling	Histamine_Degradation	0.328732394366197
Estrogen_Receptor_Signaling	Nitric_Oxide_Signaling_in_the_Cardiovascular_System	0.328743961352657
Nitric_Oxide_Signaling_in_the_Cardiovascular_System	Estrogen-Dependent_Breast_Cancer_Signaling	0.328745808182428
Calcium_Signaling	Colorectal_Cancer_Metastasis_Signaling	0.328749640701351
Calcium_Signaling	Sertoli_Cell-Sertoli_Cell_Junction_Signaling	0.328749640701351
Calcium_Signaling	Thrombin_Signaling	0.328749640701351
Colorectal_Cancer_Metastasis_Signaling	IL-6_Signaling	0.328749640701351
IL-6_Signaling	Sertoli_Cell-Sertoli_Cell_Junction_Signaling	0.328749640701351
IL-6_Signaling	Thrombin_Signaling	0.328749640701351
Acute_Phase_Response_Signaling	Retinoate_Biosynthesis_I	0.328750862663906
HIF1__Signaling	Granzyme_A_Signaling	0.328752515090543
Bladder_Cancer_Signaling	Granzyme_A_Signaling	0.328752515090543
tRNA_Charging	Ephrin_Receptor_Signaling	0.328764789497889
RhoA_Signaling	Coagulation_System	0.328771566597654
EIF2_Signaling	HMGB1_Signaling	0.328780497706329
tRNA_Charging	Estrogen-mediated_S-phase_Entry	0.328787878787879
EIF2_Signaling	Acute_Phase_Response_Signaling	0.328794577532506
Salvage_Pathways_of_Pyrimidine_Deoxyribonucleotides	Retinoate_Biosynthesis_I	0.328815901360544
RhoA_Signaling	Thyroid_Cancer_Signaling	0.328819584171697
_-linolenate_Biosynthesis_II_(Animals)	Nitric_Oxide_Signaling_in_the_Cardiovascular_System	0.328819584171697
Role_of_Osteoblasts,_Osteoclasts_and_Chondrocytes_in_Rheumatoid_Arthritis	Thyroid_Cancer_Signaling	0.328819584171697
Nitric_Oxide_Signaling_in_the_Cardiovascular_System	FXR/RXR_Activation	0.328819584171697
Eicosanoid_Signaling	CDK5_Signaling	0.32882341669062
Eicosanoid_Signaling	Fatty_Acid__-oxidation	0.32882341669062
Eicosanoid_Signaling	Histamine_Degradation	0.32882341669062
Ethanol_Degradation_II	CDK5_Signaling	0.32882341669062
Ethanol_Degradation_II	Fatty_Acid__-oxidation	0.32882341669062
Ethanol_Degradation_II	Histamine_Degradation	0.32882341669062
Noradrenaline_and_Adrenaline_Degradation	CDK5_Signaling	0.32882341669062
Noradrenaline_and_Adrenaline_Degradation	Fatty_Acid__-oxidation	0.32882341669062
Noradrenaline_and_Adrenaline_Degradation	Histamine_Degradation	0.32882341669062
Role_of_JAK2_in_Hormone-like_Cytokine_Signaling	CDK5_Signaling	0.32882341669062
Role_of_JAK2_in_Hormone-like_Cytokine_Signaling	Fatty_Acid__-oxidation	0.32882341669062
Role_of_JAK2_in_Hormone-like_Cytokine_Signaling	Histamine_Degradation	0.32882341669062
Triacylglycerol_Degradation	CDK5_Signaling	0.32882341669062
Triacylglycerol_Degradation	Fatty_Acid__-oxidation	0.32882341669062
Triacylglycerol_Degradation	Histamine_Degradation	0.32882341669062
CDK5_Signaling	Human_Embryonic_Stem_Cell_Pluripotency	0.32882341669062
CDK5_Signaling	p38_MAPK_Signaling	0.32882341669062
Fatty_Acid__-oxidation	Human_Embryonic_Stem_Cell_Pluripotency	0.32882341669062
Fatty_Acid__-oxidation	p38_MAPK_Signaling	0.32882341669062
Histamine_Degradation	Human_Embryonic_Stem_Cell_Pluripotency	0.32882341669062
Histamine_Degradation	p38_MAPK_Signaling	0.32882341669062
Factors_Promoting_Cardiogenesis_in_Vertebrates	IL-8_Signaling	0.328836830506851
Glioblastoma_Multiforme_Signaling	IL-8_Signaling	0.328836830506851
ILK_Signaling	IL-8_Signaling	0.328836830506851
Signaling_by_Rho_Family_GTPases	IL-8_Signaling	0.328836830506851
RAR_Activation	IL-8_Signaling	0.328836830506851
Integrin_Signaling	IL-8_Signaling	0.328836830506851
Agranulocyte_Adhesion_and_Diapedesis	IL-8_Signaling	0.328836830506851
IL-8_Signaling	Regulation_of_Actin-based_Motility_by_Rho	0.328836830506851
Ephrin_Receptor_Signaling	Estrogen-Dependent_Breast_Cancer_Signaling	0.328859825620389
Ephrin_Receptor_Signaling	Estrogen_Receptor_Signaling	0.328861283643892
Eicosanoid_Signaling	Ethanol_Degradation_II	0.328863658139312
Eicosanoid_Signaling	Noradrenaline_and_Adrenaline_Degradation	0.328863658139312
Eicosanoid_Signaling	Role_of_JAK2_in_Hormone-like_Cytokine_Signaling	0.328863658139312
Eicosanoid_Signaling	Triacylglycerol_Degradation	0.328863658139312
Eicosanoid_Signaling	Human_Embryonic_Stem_Cell_Pluripotency	0.328863658139312
Eicosanoid_Signaling	p38_MAPK_Signaling	0.328863658139312
Ethanol_Degradation_II	Noradrenaline_and_Adrenaline_Degradation	0.328863658139312
Ethanol_Degradation_II	Role_of_JAK2_in_Hormone-like_Cytokine_Signaling	0.328863658139312
Ethanol_Degradation_II	Triacylglycerol_Degradation	0.328863658139312
Ethanol_Degradation_II	Human_Embryonic_Stem_Cell_Pluripotency	0.328863658139312
Ethanol_Degradation_II	p38_MAPK_Signaling	0.328863658139312
Noradrenaline_and_Adrenaline_Degradation	Role_of_JAK2_in_Hormone-like_Cytokine_Signaling	0.328863658139312
Noradrenaline_and_Adrenaline_Degradation	Triacylglycerol_Degradation	0.328863658139312
Noradrenaline_and_Adrenaline_Degradation	Human_Embryonic_Stem_Cell_Pluripotency	0.328863658139312
Noradrenaline_and_Adrenaline_Degradation	p38_MAPK_Signaling	0.328863658139312
Role_of_JAK2_in_Hormone-like_Cytokine_Signaling	Triacylglycerol_Degradation	0.328863658139312
Role_of_JAK2_in_Hormone-like_Cytokine_Signaling	Human_Embryonic_Stem_Cell_Pluripotency	0.328863658139312
Role_of_JAK2_in_Hormone-like_Cytokine_Signaling	p38_MAPK_Signaling	0.328863658139312
Triacylglycerol_Degradation	Human_Embryonic_Stem_Cell_Pluripotency	0.328863658139312
Triacylglycerol_Degradation	p38_MAPK_Signaling	0.328863658139312
Human_Embryonic_Stem_Cell_Pluripotency	p38_MAPK_Signaling	0.328863658139312
Role_of_Osteoblasts,_Osteoclasts_and_Chondrocytes_in_Rheumatoid_Arthritis	Dendritic_Cell_Maturation	0.328866532528504
CDK5_Signaling	Fatty_Acid__-oxidation	0.328883778863658
CDK5_Signaling	Histamine_Degradation	0.328883778863658
RhoA_Signaling	Dendritic_Cell_Maturation	0.32888665325285
Eicosanoid_Signaling	Granzyme_A_Signaling	0.32891060649612
Ethanol_Degradation_II	Granzyme_A_Signaling	0.32891060649612
Noradrenaline_and_Adrenaline_Degradation	Granzyme_A_Signaling	0.32891060649612
Role_of_JAK2_in_Hormone-like_Cytokine_Signaling	Granzyme_A_Signaling	0.32891060649612
Triacylglycerol_Degradation	Granzyme_A_Signaling	0.32891060649612
Granzyme_A_Signaling	Human_Embryonic_Stem_Cell_Pluripotency	0.32891060649612
Granzyme_A_Signaling	p38_MAPK_Signaling	0.32891060649612
CDK5_Signaling	Granzyme_A_Signaling	0.328917313404235
Granzyme_A_Signaling	Fatty_Acid__-oxidation	0.328917313404235
Granzyme_A_Signaling	Histamine_Degradation	0.328917313404235
Salvage_Pathways_of_Pyrimidine_Deoxyribonucleotides	Cell_Cycle:_G2/M_DNA_Damage_Checkpoint_Regulation	0.328931642101285
Ephrin_Receptor_Signaling	_-linolenate_Biosynthesis_II_(Animals)	0.328933601609658
Ephrin_Receptor_Signaling	FXR/RXR_Activation	0.328933601609658
Fatty_Acid__-oxidation	Histamine_Degradation	0.328984382485389
Retinoate_Biosynthesis_I	Estrogen_Receptor_Signaling	0.328992408557626
HIF1__Signaling	CD28_Signaling_in_T_Helper_Cells	0.329000670690812
HIF1__Signaling	Antioxidant_Action_of_Vitamin_C	0.329000670690812
Bladder_Cancer_Signaling	CD28_Signaling_in_T_Helper_Cells	0.329000670690812
Bladder_Cancer_Signaling	Antioxidant_Action_of_Vitamin_C	0.329000670690812
Prolactin_Signaling	Role_of_Macrophages,_Fibroblasts_and_Endothelial_Cells_in_Rheumatoid_Arthritis	0.329001149755677
Assembly_of_RNA_Polymerase_II_Complex	Colorectal_Cancer_Metastasis_Signaling	0.329006211180124
Assembly_of_RNA_Polymerase_II_Complex	Sertoli_Cell-Sertoli_Cell_Junction_Signaling	0.329006211180124
Assembly_of_RNA_Polymerase_II_Complex	Thrombin_Signaling	0.329006211180124
Wnt/_-catenin_Signaling	HMGB1_Signaling	0.329013112491373
Prolactin_Signaling	Estrogen-Dependent_Breast_Cancer_Signaling	0.329017917025965
Basal_Cell_Carcinoma_Signaling	HMGB1_Signaling	0.329040912139504
Estrogen-mediated_S-phase_Entry	Coagulation_System	0.329042341574311
HIF1__Signaling	Colorectal_Cancer_Metastasis_Signaling	0.329047619047619
HIF1__Signaling	Sertoli_Cell-Sertoli_Cell_Junction_Signaling	0.329047619047619
HIF1__Signaling	Thrombin_Signaling	0.329047619047619
Bladder_Cancer_Signaling	Colorectal_Cancer_Metastasis_Signaling	0.329047619047619
Bladder_Cancer_Signaling	Sertoli_Cell-Sertoli_Cell_Junction_Signaling	0.329047619047619
Bladder_Cancer_Signaling	Thrombin_Signaling	0.329047619047619
Calcium_Signaling	IL-8_Signaling	0.329051451566542
IL-6_Signaling	IL-8_Signaling	0.329051451566542
Tryptophan_Degradation_X_(Mammalian,_via_Tryptamine)	HMGB1_Signaling	0.32906103286385
tRNA_Charging	Colorectal_Cancer_Metastasis_Signaling	0.329067714042139
tRNA_Charging	Sertoli_Cell-Sertoli_Cell_Junction_Signaling	0.329067714042139
tRNA_Charging	Thrombin_Signaling	0.329067714042139
Nitric_Oxide_Signaling_in_the_Cardiovascular_System	Role_of_Macrophages,_Fibroblasts_and_Endothelial_Cells_in_Rheumatoid_Arthritis	0.329101274312542
Eicosanoid_Signaling	CD28_Signaling_in_T_Helper_Cells	0.329105106831465
Eicosanoid_Signaling	Antioxidant_Action_of_Vitamin_C	0.329105106831465
Ethanol_Degradation_II	CD28_Signaling_in_T_Helper_Cells	0.329105106831465
Ethanol_Degradation_II	Antioxidant_Action_of_Vitamin_C	0.329105106831465
Noradrenaline_and_Adrenaline_Degradation	CD28_Signaling_in_T_Helper_Cells	0.329105106831465
Noradrenaline_and_Adrenaline_Degradation	Antioxidant_Action_of_Vitamin_C	0.329105106831465
Role_of_JAK2_in_Hormone-like_Cytokine_Signaling	CD28_Signaling_in_T_Helper_Cells	0.329105106831465
Role_of_JAK2_in_Hormone-like_Cytokine_Signaling	Antioxidant_Action_of_Vitamin_C	0.329105106831465
Triacylglycerol_Degradation	CD28_Signaling_in_T_Helper_Cells	0.329105106831465
Triacylglycerol_Degradation	Antioxidant_Action_of_Vitamin_C	0.329105106831465
CD28_Signaling_in_T_Helper_Cells	Human_Embryonic_Stem_Cell_Pluripotency	0.329105106831465
CD28_Signaling_in_T_Helper_Cells	p38_MAPK_Signaling	0.329105106831465
Human_Embryonic_Stem_Cell_Pluripotency	Antioxidant_Action_of_Vitamin_C	0.329105106831465
p38_MAPK_Signaling	Antioxidant_Action_of_Vitamin_C	0.329105106831465
Putrescine_Degradation_III	HMGB1_Signaling	0.329107981220657
Oxidative_Ethanol_Degradation_III	HMGB1_Signaling	0.329107981220657
Ethanol_Degradation_IV	HMGB1_Signaling	0.329107981220657
LPS/IL-1_Mediated_Inhibition_of_RXR_Function	Regulation_of_the_Epithelial-Mesenchymal_Transition_Pathway	0.329114061083371
RhoA_Signaling	Estrogen-Dependent_Breast_Cancer_Signaling	0.32916163648558
Coagulation_System	Dendritic_Cell_Maturation	0.32916163648558
CD28_Signaling_in_T_Helper_Cells	Fatty_Acid__-oxidation	0.329165469004503
CD28_Signaling_in_T_Helper_Cells	Histamine_Degradation	0.329165469004503
Fatty_Acid__-oxidation	Antioxidant_Action_of_Vitamin_C	0.329165469004503
Histamine_Degradation	Antioxidant_Action_of_Vitamin_C	0.329165469004503
RhoA_Signaling	Estrogen_Receptor_Signaling	0.329171842650104
tRNA_Charging	Factors_Promoting_Cardiogenesis_in_Vertebrates	0.329174505623145
tRNA_Charging	Glioblastoma_Multiforme_Signaling	0.329174505623145
tRNA_Charging	ILK_Signaling	0.329174505623145
tRNA_Charging	Signaling_by_Rho_Family_GTPases	0.329174505623145
tRNA_Charging	RAR_Activation	0.329174505623145
tRNA_Charging	Integrin_Signaling	0.329174505623145
tRNA_Charging	Agranulocyte_Adhesion_and_Diapedesis	0.329174505623145
tRNA_Charging	Regulation_of_Actin-based_Motility_by_Rho	0.329174505623145
CDK5_Signaling	CD28_Signaling_in_T_Helper_Cells	0.329185589728849
CDK5_Signaling	Antioxidant_Action_of_Vitamin_C	0.329185589728849
Estrogen-mediated_S-phase_Entry	Thyroid_Cancer_Signaling	0.329185645272602
Eicosanoid_Signaling	Colorectal_Cancer_Metastasis_Signaling	0.329192296636965
Eicosanoid_Signaling	Sertoli_Cell-Sertoli_Cell_Junction_Signaling	0.329192296636965
Eicosanoid_Signaling	Thrombin_Signaling	0.329192296636965
Ethanol_Degradation_II	Colorectal_Cancer_Metastasis_Signaling	0.329192296636965
Ethanol_Degradation_II	Sertoli_Cell-Sertoli_Cell_Junction_Signaling	0.329192296636965
Ethanol_Degradation_II	Thrombin_Signaling	0.329192296636965
Noradrenaline_and_Adrenaline_Degradation	Colorectal_Cancer_Metastasis_Signaling	0.329192296636965
Noradrenaline_and_Adrenaline_Degradation	Sertoli_Cell-Sertoli_Cell_Junction_Signaling	0.329192296636965
Noradrenaline_and_Adrenaline_Degradation	Thrombin_Signaling	0.329192296636965
Role_of_JAK2_in_Hormone-like_Cytokine_Signaling	Colorectal_Cancer_Metastasis_Signaling	0.329192296636965
Role_of_JAK2_in_Hormone-like_Cytokine_Signaling	Sertoli_Cell-Sertoli_Cell_Junction_Signaling	0.329192296636965
Role_of_JAK2_in_Hormone-like_Cytokine_Signaling	Thrombin_Signaling	0.329192296636965
Triacylglycerol_Degradation	Colorectal_Cancer_Metastasis_Signaling	0.329192296636965
Triacylglycerol_Degradation	Sertoli_Cell-Sertoli_Cell_Junction_Signaling	0.329192296636965
Triacylglycerol_Degradation	Thrombin_Signaling	0.329192296636965
Colorectal_Cancer_Metastasis_Signaling	Human_Embryonic_Stem_Cell_Pluripotency	0.329192296636965
Colorectal_Cancer_Metastasis_Signaling	p38_MAPK_Signaling	0.329192296636965
Human_Embryonic_Stem_Cell_Pluripotency	Sertoli_Cell-Sertoli_Cell_Junction_Signaling	0.329192296636965
Human_Embryonic_Stem_Cell_Pluripotency	Thrombin_Signaling	0.329192296636965
p38_MAPK_Signaling	Sertoli_Cell-Sertoli_Cell_Junction_Signaling	0.329192296636965
p38_MAPK_Signaling	Thrombin_Signaling	0.329192296636965
Role_of_Osteoblasts,_Osteoclasts_and_Chondrocytes_in_Rheumatoid_Arthritis	Estrogen-Dependent_Breast_Cancer_Signaling	0.329195171026157
Wnt/_-catenin_Signaling	Acute_Phase_Response_Signaling	0.32919863597613
Germ_Cell-Sertoli_Cell_Junction_Signaling	HMGB1_Signaling	0.329205710453195
Role_of_Osteoblasts,_Osteoclasts_and_Chondrocytes_in_Rheumatoid_Arthritis	Estrogen_Receptor_Signaling	0.329206349206349
Ephrin_Receptor_Signaling	Role_of_Macrophages,_Fibroblasts_and_Endothelial_Cells_in_Rheumatoid_Arthritis	0.329215291750503
Basal_Cell_Carcinoma_Signaling	Acute_Phase_Response_Signaling	0.329220151828847
Acute_Phase_Response_Signaling	Tryptophan_Degradation_X_(Mammalian,_via_Tryptamine)	0.329220151828847
RhoA_Signaling	_-linolenate_Biosynthesis_II_(Animals)	0.329235412474849
RhoA_Signaling	FXR/RXR_Activation	0.329235412474849
Triacylglycerol_Biosynthesis	HMGB1_Signaling	0.329235412474849
Granzyme_A_Signaling	CD28_Signaling_in_T_Helper_Cells	0.329239244993772
Granzyme_A_Signaling	Antioxidant_Action_of_Vitamin_C	0.329239244993772
_-linolenate_Biosynthesis_II_(Animals)	Role_of_Osteoblasts,_Osteoclasts_and_Chondrocytes_in_Rheumatoid_Arthritis	0.32924882629108
Role_of_Osteoblasts,_Osteoclasts_and_Chondrocytes_in_Rheumatoid_Arthritis	FXR/RXR_Activation	0.32924882629108
Colorectal_Cancer_Metastasis_Signaling	Fatty_Acid__-oxidation	0.329252658810003
Colorectal_Cancer_Metastasis_Signaling	Histamine_Degradation	0.329252658810003
Fatty_Acid__-oxidation	Sertoli_Cell-Sertoli_Cell_Junction_Signaling	0.329252658810003
Fatty_Acid__-oxidation	Thrombin_Signaling	0.329252658810003
Histamine_Degradation	Sertoli_Cell-Sertoli_Cell_Junction_Signaling	0.329252658810003
Histamine_Degradation	Thrombin_Signaling	0.329252658810003
Estrogen-mediated_S-phase_Entry	Dendritic_Cell_Maturation	0.329254658385093
Assembly_of_RNA_Polymerase_II_Complex	CD28_Signaling_in_T_Helper_Cells	0.329275362318841
Assembly_of_RNA_Polymerase_II_Complex	Antioxidant_Action_of_Vitamin_C	0.329275362318841
Granzyme_A_Signaling	Colorectal_Cancer_Metastasis_Signaling	0.32928619335058
Granzyme_A_Signaling	Sertoli_Cell-Sertoli_Cell_Junction_Signaling	0.32928619335058
Granzyme_A_Signaling	Thrombin_Signaling	0.32928619335058
EIF2_Signaling	Assembly_of_RNA_Polymerase_II_Complex	0.329302019315189
Putrescine_Degradation_III	Acute_Phase_Response_Signaling	0.329309868875086
Oxidative_Ethanol_Degradation_III	Acute_Phase_Response_Signaling	0.329309868875086
Acute_Phase_Response_Signaling	Ethanol_Degradation_IV	0.329309868875086
Salvage_Pathways_of_Pyrimidine_Deoxyribonucleotides	Basal_Cell_Carcinoma_Signaling	0.329311933106576
Salvage_Pathways_of_Pyrimidine_Deoxyribonucleotides	Tight_Junction_Signaling	0.329311933106576
Assembly_of_RNA_Polymerase_II_Complex	IL-8_Signaling	0.329316770186335
HIF1__Signaling	IL-8_Signaling	0.32934942991281
Bladder_Cancer_Signaling	IL-8_Signaling	0.32934942991281
CDK5_Signaling	Colorectal_Cancer_Metastasis_Signaling	0.329353262431733
CDK5_Signaling	Sertoli_Cell-Sertoli_Cell_Junction_Signaling	0.329353262431733
CDK5_Signaling	Thrombin_Signaling	0.329353262431733
Acute_Phase_Response_Signaling	Germ_Cell-Sertoli_Cell_Junction_Signaling	0.329369022971507
Acute_Phase_Response_Signaling	Triacylglycerol_Biosynthesis	0.329399585921325
tRNA_Charging	Calcium_Signaling	0.329408629123291
tRNA_Charging	IL-6_Signaling	0.329408629123291
Factors_Promoting_Cardiogenesis_in_Vertebrates	Thyroid_Cancer_Signaling	0.329429912810195
Glioblastoma_Multiforme_Signaling	Thyroid_Cancer_Signaling	0.329429912810195
ILK_Signaling	Thyroid_Cancer_Signaling	0.329429912810195
Signaling_by_Rho_Family_GTPases	Thyroid_Cancer_Signaling	0.329429912810195
RAR_Activation	Thyroid_Cancer_Signaling	0.329429912810195
Integrin_Signaling	Thyroid_Cancer_Signaling	0.329429912810195
Agranulocyte_Adhesion_and_Diapedesis	Thyroid_Cancer_Signaling	0.329429912810195
Thyroid_Cancer_Signaling	Regulation_of_Actin-based_Motility_by_Rho	0.329429912810195
Factors_Promoting_Cardiogenesis_in_Vertebrates	Coagulation_System	0.329434092477571
Glioblastoma_Multiforme_Signaling	Coagulation_System	0.329434092477571
ILK_Signaling	Coagulation_System	0.329434092477571
Coagulation_System	Signaling_by_Rho_Family_GTPases	0.329434092477571
Coagulation_System	RAR_Activation	0.329434092477571
Coagulation_System	Integrin_Signaling	0.329434092477571
Coagulation_System	Agranulocyte_Adhesion_and_Diapedesis	0.329434092477571
Coagulation_System	Regulation_of_Actin-based_Motility_by_Rho	0.329434092477571
Estrogen-mediated_S-phase_Entry	Estrogen_Receptor_Signaling	0.329468599033816
Eicosanoid_Signaling	IL-8_Signaling	0.329494107502156
Ethanol_Degradation_II	IL-8_Signaling	0.329494107502156
Noradrenaline_and_Adrenaline_Degradation	IL-8_Signaling	0.329494107502156
Role_of_JAK2_in_Hormone-like_Cytokine_Signaling	IL-8_Signaling	0.329494107502156
Triacylglycerol_Degradation	IL-8_Signaling	0.329494107502156
Human_Embryonic_Stem_Cell_Pluripotency	IL-8_Signaling	0.329494107502156
p38_MAPK_Signaling	IL-8_Signaling	0.329494107502156
Calcium_Signaling	Coagulation_System	0.329496204278813
Coagulation_System	IL-6_Signaling	0.329496204278813
RhoA_Signaling	Role_of_Macrophages,_Fibroblasts_and_Endothelial_Cells_in_Rheumatoid_Arthritis	0.329496981891348
Factors_Promoting_Cardiogenesis_in_Vertebrates	Dendritic_Cell_Maturation	0.329530516431925
Glioblastoma_Multiforme_Signaling	Dendritic_Cell_Maturation	0.329530516431925
ILK_Signaling	Dendritic_Cell_Maturation	0.329530516431925
Role_of_Osteoblasts,_Osteoclasts_and_Chondrocytes_in_Rheumatoid_Arthritis	Role_of_Macrophages,_Fibroblasts_and_Endothelial_Cells_in_Rheumatoid_Arthritis	0.329530516431925
Signaling_by_Rho_Family_GTPases	Dendritic_Cell_Maturation	0.329530516431925
RAR_Activation	Dendritic_Cell_Maturation	0.329530516431925
Integrin_Signaling	Dendritic_Cell_Maturation	0.329530516431925
Agranulocyte_Adhesion_and_Diapedesis	Dendritic_Cell_Maturation	0.329530516431925
Dendritic_Cell_Maturation	Regulation_of_Actin-based_Motility_by_Rho	0.329530516431925
Estrogen-mediated_S-phase_Entry	Estrogen-Dependent_Breast_Cancer_Signaling	0.329537612146308
CD28_Signaling_in_T_Helper_Cells	Colorectal_Cancer_Metastasis_Signaling	0.329554469675194
CD28_Signaling_in_T_Helper_Cells	Sertoli_Cell-Sertoli_Cell_Junction_Signaling	0.329554469675194
CD28_Signaling_in_T_Helper_Cells	Thrombin_Signaling	0.329554469675194
Colorectal_Cancer_Metastasis_Signaling	Antioxidant_Action_of_Vitamin_C	0.329554469675194
Fatty_Acid__-oxidation	IL-8_Signaling	0.329554469675194
Histamine_Degradation	IL-8_Signaling	0.329554469675194
Antioxidant_Action_of_Vitamin_C	Sertoli_Cell-Sertoli_Cell_Junction_Signaling	0.329554469675194
Antioxidant_Action_of_Vitamin_C	Thrombin_Signaling	0.329554469675194
Salvage_Pathways_of_Pyrimidine_Deoxyribonucleotides	Germ_Cell-Sertoli_Cell_Junction_Signaling	0.329556405895692
tRNA_Charging	Assembly_of_RNA_Polymerase_II_Complex	0.329556761646314
Granzyme_A_Signaling	IL-8_Signaling	0.329588004215771
CD28_Signaling_in_T_Helper_Cells	Antioxidant_Action_of_Vitamin_C	0.329588004215771
Estrogen-mediated_S-phase_Entry	_-linolenate_Biosynthesis_II_(Animals)	0.329613526570048
Estrogen-mediated_S-phase_Entry	FXR/RXR_Activation	0.329613526570048
Calcium_Signaling	Thyroid_Cancer_Signaling	0.32962441314554
Thyroid_Cancer_Signaling	IL-6_Signaling	0.32962441314554
Estrogen_Receptor_Signaling	Estrogen-Dependent_Breast_Cancer_Signaling	0.329651240778001
tRNA_Charging	HIF1__Signaling	0.329653204565408
tRNA_Charging	Bladder_Cancer_Signaling	0.329653204565408
CDK5_Signaling	IL-8_Signaling	0.329655073296924
Axonal_Guidance_Signaling	HMGB1_Signaling	0.329659863945578
Acute_Phase_Response_Signaling	Axonal_Guidance_Signaling	0.32968401853495
Calcium_Signaling	Dendritic_Cell_Maturation	0.329691482226693
Dendritic_Cell_Maturation	IL-6_Signaling	0.329691482226693
Colorectal_Cancer_Metastasis_Signaling	Sertoli_Cell-Sertoli_Cell_Junction_Signaling	0.329722142378078
Colorectal_Cancer_Metastasis_Signaling	Thrombin_Signaling	0.329722142378078
Sertoli_Cell-Sertoli_Cell_Junction_Signaling	Thrombin_Signaling	0.329722142378078
Prolactin_Signaling	HMGB1_Signaling	0.329759509437578
Salvage_Pathways_of_Pyrimidine_Deoxyribonucleotides	Axonal_Guidance_Signaling	0.329777258125472
Factors_Promoting_Cardiogenesis_in_Vertebrates	Estrogen-Dependent_Breast_Cancer_Signaling	0.329805499664655
Glioblastoma_Multiforme_Signaling	Estrogen-Dependent_Breast_Cancer_Signaling	0.329805499664655
ILK_Signaling	Estrogen-Dependent_Breast_Cancer_Signaling	0.329805499664655
Signaling_by_Rho_Family_GTPases	Estrogen-Dependent_Breast_Cancer_Signaling	0.329805499664655
RAR_Activation	Estrogen-Dependent_Breast_Cancer_Signaling	0.329805499664655
Integrin_Signaling	Estrogen-Dependent_Breast_Cancer_Signaling	0.329805499664655
Agranulocyte_Adhesion_and_Diapedesis	Estrogen-Dependent_Breast_Cancer_Signaling	0.329805499664655
Estrogen-Dependent_Breast_Cancer_Signaling	Regulation_of_Actin-based_Motility_by_Rho	0.329805499664655
Assembly_of_RNA_Polymerase_II_Complex	Coagulation_System	0.329805545406568
LPS/IL-1_Mediated_Inhibition_of_RXR_Function	Cellular_Effects_of_Sildenafil_(Viagra)	0.329816709292413
Factors_Promoting_Cardiogenesis_in_Vertebrates	Estrogen_Receptor_Signaling	0.329834368530021
Glioblastoma_Multiforme_Signaling	Estrogen_Receptor_Signaling	0.329834368530021
ILK_Signaling	Estrogen_Receptor_Signaling	0.329834368530021
Signaling_by_Rho_Family_GTPases	Estrogen_Receptor_Signaling	0.329834368530021
Estrogen_Receptor_Signaling	RAR_Activation	0.329834368530021
Estrogen_Receptor_Signaling	Integrin_Signaling	0.329834368530021
Estrogen_Receptor_Signaling	Germ_Cell-Sertoli_Cell_Junction_Signaling	0.329834368530021
Estrogen_Receptor_Signaling	Agranulocyte_Adhesion_and_Diapedesis	0.329834368530021
Estrogen_Receptor_Signaling	Regulation_of_Actin-based_Motility_by_Rho	0.329834368530021
CD28_Signaling_in_T_Helper_Cells	IL-8_Signaling	0.329856280540385
Antioxidant_Action_of_Vitamin_C	IL-8_Signaling	0.329856280540385
Factors_Promoting_Cardiogenesis_in_Vertebrates	_-linolenate_Biosynthesis_II_(Animals)	0.329859154929577
Factors_Promoting_Cardiogenesis_in_Vertebrates	FXR/RXR_Activation	0.329859154929577
Glioblastoma_Multiforme_Signaling	_-linolenate_Biosynthesis_II_(Animals)	0.329859154929577
Glioblastoma_Multiforme_Signaling	FXR/RXR_Activation	0.329859154929577
ILK_Signaling	_-linolenate_Biosynthesis_II_(Animals)	0.329859154929577
ILK_Signaling	FXR/RXR_Activation	0.329859154929577
_-linolenate_Biosynthesis_II_(Animals)	Signaling_by_Rho_Family_GTPases	0.329859154929577
_-linolenate_Biosynthesis_II_(Animals)	RAR_Activation	0.329859154929577
_-linolenate_Biosynthesis_II_(Animals)	Integrin_Signaling	0.329859154929577
_-linolenate_Biosynthesis_II_(Animals)	Agranulocyte_Adhesion_and_Diapedesis	0.329859154929577
_-linolenate_Biosynthesis_II_(Animals)	Regulation_of_Actin-based_Motility_by_Rho	0.329859154929577
Signaling_by_Rho_Family_GTPases	FXR/RXR_Activation	0.329859154929577
RAR_Activation	FXR/RXR_Activation	0.329859154929577
Integrin_Signaling	FXR/RXR_Activation	0.329859154929577
Agranulocyte_Adhesion_and_Diapedesis	FXR/RXR_Activation	0.329859154929577
FXR/RXR_Activation	Regulation_of_Actin-based_Motility_by_Rho	0.329859154929577
Nitric_Oxide_Signaling_in_the_Cardiovascular_System	HMGB1_Signaling	0.329865861837693
HIF1__Signaling	Coagulation_System	0.329878734102337
Coagulation_System	Bladder_Cancer_Signaling	0.329878734102337
tRNA_Charging	Eicosanoid_Signaling	0.329891508842343
tRNA_Charging	Ethanol_Degradation_II	0.329891508842343
tRNA_Charging	Noradrenaline_and_Adrenaline_Degradation	0.329891508842343
tRNA_Charging	Role_of_JAK2_in_Hormone-like_Cytokine_Signaling	0.329891508842343
tRNA_Charging	Triacylglycerol_Degradation	0.329891508842343
tRNA_Charging	Human_Embryonic_Stem_Cell_Pluripotency	0.329891508842343
tRNA_Charging	p38_MAPK_Signaling	0.329891508842343
Estrogen-mediated_S-phase_Entry	Role_of_Macrophages,_Fibroblasts_and_Endothelial_Cells_in_Rheumatoid_Arthritis	0.329903381642512
[truncated: 629 more rows]
