# Supplementary material for: In silico identification of drug target pathways in breast cancer subtypes using pathway cross-talk inhibition
Source: J Transl Med. 2018 Jun 5;16:154. doi: 10.1186/s12967-018-1535-2 (PMC5989433; doi:10.1186/s12967-018-1535-2)
Supplement: Supplementary file 3 — Additional file 3. Shows the network efficiency after inhibition of individual and combined pathway(s) in HER2 BC. [file 12967_2018_1535_MOESM3_ESM.xlsx]

## Sheet: HER NE individual pathway
Pathway	NE
Role_of_BRCA1_in_DNA_Damage_Response	0.330913
NAD_biosynthesis_II_(from_tryptophan)	0.339184
Protein_Kinase_A_Signaling	0.339495
Ephrin_Receptor_Signaling	0.344575
Growth_Hormone_Signaling	0.345488
Cellular_Effects_of_Sildenafil_(Viagra)	0.346016
Human_Embryonic_Stem_Cell_Pluripotency	0.346454
Axonal_Guidance_Signaling	0.346603
CXCR4_Signaling	0.346657
Acute_Phase_Response_Signaling	0.346714
Tryptophan_Degradation_X_(Mammalian,_via_Tryptamine)	0.346784
Protein_Ubiquitination_Pathway	0.346837
Calcium_Signaling	0.347004
Fatty_Acid__-oxidation	0.347071
TR/RXR_Activation	0.347083
Bladder_Cancer_Signaling	0.347385
Intrinsic_Prothrombin_Activation_Pathway	0.347419
Role_of_Osteoblasts,_Osteoclasts_and_Chondrocytes_in_Rheumatoid_Arthritis	0.347516
HIF1__Signaling	0.347566
P2Y_Purigenic_Receptor_Signaling_Pathway	0.347591
Assembly_of_RNA_Polymerase_II_Complex	0.347602
Putrescine_Degradation_III	0.347993
cAMP-mediated_signaling	0.348079
Ethanol_Degradation_IV	0.348144
Salvage_Pathways_of_Pyrimidine_Deoxyribonucleotides	0.348251
Leptin_Signaling_in_Obesity	0.348421
Epithelial_Adherens_Junction_Signaling	0.348581
Nitric_Oxide_Signaling_in_the_Cardiovascular_System	0.348591
Colorectal_Cancer_Metastasis_Signaling	0.348694
EIF2_Signaling	0.348766
Coagulation_System	0.34888
Role_of_Macrophages,_Fibroblasts_and_Endothelial_Cells_in_Rheumatoid_Arthritis	0.348978
Thrombin_Signaling	0.349065
Regulation_of_the_Epithelial-Mesenchymal_Transition_Pathway	0.3491
tRNA_Charging	0.349256
Prolactin_Signaling	0.349282
Antigen_Presentation_Pathway	0.349289
Glioma_Invasiveness_Signaling	0.349289
Glycine_Betaine_Degradation	0.349299
Cell_Cycle_Control_of_Chromosomal_Replication	0.349313
Dopamine_Degradation	0.349354
Role_of_Tissue_Factor_in_Cancer	0.349368
VDR/RXR_Activation	0.349402
Glioblastoma_Multiforme_Signaling	0.349464
Histamine_Degradation	0.349491
Noradrenaline_and_Adrenaline_Degradation	0.349491
Basal_Cell_Carcinoma_Signaling	0.349505
Inhibition_of_Matrix_Metalloproteases	0.349519
Atherosclerosis_Signaling	0.349697
Relaxin_Signaling	0.349712
DNA_damage-induced_14-3-3__Signaling	0.349718
Wnt/_-catenin_Signaling	0.34977
G_s_Signaling	0.349771
TWEAK_Signaling	0.34979
Ethanol_Degradation_II	0.349797
Thrombopoietin_Signaling	0.349831
Endothelin-1_Signaling	0.349845
Gap_Junction_Signaling	0.349845
Synaptic_Long_Term_Depression	0.349845
Dendritic_Cell_Maturation	0.349845
Leukocyte_Extravasation_Signaling	0.349845
Eicosanoid_Signaling	0.349849
Agranulocyte_Adhesion_and_Diapedesis	0.349873
RAR_Activation	0.349873
LPS/IL-1_Mediated_Inhibition_of_RXR_Function	0.349873
Oncostatin_M_Signaling	0.349873
Tryptophan_Degradation_to_2-amino-3-carboxymuconate_Semialdehyde	0.349873
Ovarian_Cancer_Signaling	0.349941
Actin_Cytoskeleton_Signaling	0.350093
Integrin_Signaling	0.350093
CREB_Signaling_in_Neurons	0.350093
Role_of_JAK2_in_Hormone-like_Cytokine_Signaling	0.350096
Hepatic_Fibrosis_/_Hepatic_Stellate_Cell_Activation	0.350216
Sperm_Motility	0.350216
ILK_Signaling	0.350216
G_Beta_Gamma_Signaling	0.350238
Retinoate_Biosynthesis_I	0.350257
Induction_of_Apoptosis_by_HIV1	0.350271
GDNF_Family_Ligand-Receptor_Interactions	0.350285
RhoGDI_Signaling	0.350292
Factors_Promoting_Cardiogenesis_in_Vertebrates	0.350292
IL-8_Signaling	0.350381
Cardiac_Hypertrophy_Signaling	0.350381
CDK5_Signaling	0.350381
Extrinsic_Prothrombin_Activation_Pathway	0.350489
Role_of_CHK_Proteins_in_Cell_Cycle_Checkpoint_Control	0.350572
Glycogen_Degradation_II	0.350592
Cardiac__-adrenergic_Signaling	0.350694
Role_of_IL-17A_in_Psoriasis	0.350802
tRNA_Splicing	0.350802
Macropinocytosis_Signaling	0.351011
Thyroid_Cancer_Signaling	0.351255
Caveolar-mediated_Endocytosis_Signaling	0.351485
Regulation_of_eIF4_and_p70S6K_Signaling	0.351485
Estrogen_Receptor_Signaling	0.351555
Oxidative_Ethanol_Degradation_III	0.352039
Breast_Cancer_Regulation_by_Stathmin1	0.352051
Mismatch_Repair_in_Eukaryotes	0.353706
_-Adrenergic_Signaling	0.353813
Corticotropin_Releasing_Hormone_Signaling	0.35471

## Sheet: HER NE combined pathways
Pathway 1	Pathway 2	NE
NAD_biosynthesis_II_(from_tryptophan)	Role_of_BRCA1_in_DNA_Damage_Response	0.318996427238309
Role_of_BRCA1_in_DNA_Damage_Response	Protein_Kinase_A_Signaling	0.320816969399444
Growth_Hormone_Signaling	Role_of_BRCA1_in_DNA_Damage_Response	0.325575330466635
Role_of_BRCA1_in_DNA_Damage_Response	Ephrin_Receptor_Signaling	0.325722825642284
NAD_biosynthesis_II_(from_tryptophan)	Ethanol_Degradation_IV	0.326470499834691
CXCR4_Signaling	Role_of_BRCA1_in_DNA_Damage_Response	0.327237419790611
Axonal_Guidance_Signaling	Role_of_BRCA1_in_DNA_Damage_Response	0.32750443817878
Role_of_BRCA1_in_DNA_Damage_Response	Protein_Ubiquitination_Pathway	0.32750496031746
Role_of_BRCA1_in_DNA_Damage_Response	Cellular_Effects_of_Sildenafil_(Viagra)	0.327736789891395
Role_of_BRCA1_in_DNA_Damage_Response	Human_Embryonic_Stem_Cell_Pluripotency	0.327737635002455
Role_of_BRCA1_in_DNA_Damage_Response	Calcium_Signaling	0.328081277614138
Acute_Phase_Response_Signaling	Role_of_BRCA1_in_DNA_Damage_Response	0.328129858042873
Role_of_BRCA1_in_DNA_Damage_Response	TR/RXR_Activation	0.328482193994436
Role_of_BRCA1_in_DNA_Damage_Response	Intrinsic_Prothrombin_Activation_Pathway	0.328613982873851
HIF1__Signaling	Role_of_BRCA1_in_DNA_Damage_Response	0.328701702172097
Role_of_BRCA1_in_DNA_Damage_Response	Bladder_Cancer_Signaling	0.328743505563737
Role_of_BRCA1_in_DNA_Damage_Response	Fatty_Acid__-oxidation	0.328788506381934
Role_of_BRCA1_in_DNA_Damage_Response	Tryptophan_Degradation_X_(Mammalian,_via_Tryptamine)	0.328837086810669
Role_of_BRCA1_in_DNA_Damage_Response	P2Y_Purigenic_Receptor_Signaling_Pathway	0.328865212322042
Role_of_BRCA1_in_DNA_Damage_Response	Assembly_of_RNA_Polymerase_II_Complex	0.328933224922271
NAD_biosynthesis_II_(from_tryptophan)	Protein_Kinase_A_Signaling	0.329049322232575
Role_of_BRCA1_in_DNA_Damage_Response	Role_of_Osteoblasts,_Osteoclasts_and_Chondrocytes_in_Rheumatoid_Arthritis	0.32913368311242
Coagulation_System	Role_of_BRCA1_in_DNA_Damage_Response	0.329403481822837
Role_of_BRCA1_in_DNA_Damage_Response	Salvage_Pathways_of_Pyrimidine_Deoxyribonucleotides	0.329408290378007
Role_of_BRCA1_in_DNA_Damage_Response	Putrescine_Degradation_III	0.329599032482409
Role_of_BRCA1_in_DNA_Damage_Response	Leptin_Signaling_in_Obesity	0.329729943953526
tRNA_Charging	Role_of_BRCA1_in_DNA_Damage_Response	0.329813652754627
Role_of_BRCA1_in_DNA_Damage_Response	Epithelial_Adherens_Junction_Signaling	0.329896140157094
Role_of_BRCA1_in_DNA_Damage_Response	Nitric_Oxide_Signaling_in_the_Cardiovascular_System	0.329906878988709
Role_of_BRCA1_in_DNA_Damage_Response	Colorectal_Cancer_Metastasis_Signaling	0.33001426730486
Role_of_BRCA1_in_DNA_Damage_Response	Ethanol_Degradation_IV	0.33014926975945
Role_of_BRCA1_in_DNA_Damage_Response	EIF2_Signaling	0.330218305105547
Role_of_BRCA1_in_DNA_Damage_Response	Cell_Cycle_Control_of_Chromosomal_Replication	0.330302681639666
Role_of_BRCA1_in_DNA_Damage_Response	Thrombin_Signaling	0.330400865243004
Role_of_BRCA1_in_DNA_Damage_Response	Regulation_of_the_Epithelial-Mesenchymal_Transition_Pathway	0.330447400180003
Role_of_BRCA1_in_DNA_Damage_Response	cAMP-mediated_signaling	0.330597743822615
Role_of_BRCA1_in_DNA_Damage_Response	Prolactin_Signaling	0.330626380706922
Role_of_BRCA1_in_DNA_Damage_Response	Antigen_Presentation_Pathway	0.330644278759614
Role_of_BRCA1_in_DNA_Damage_Response	Glioma_Invasiveness_Signaling	0.330644278759614
Role_of_BRCA1_in_DNA_Damage_Response	Role_of_Tissue_Factor_in_Cancer	0.330715870970381
Role_of_BRCA1_in_DNA_Damage_Response	Glycine_Betaine_Degradation	0.330737348633611
Role_of_BRCA1_in_DNA_Damage_Response	VDR/RXR_Activation	0.33076240590738
Role_of_BRCA1_in_DNA_Damage_Response	Glioblastoma_Multiforme_Signaling	0.330816100065456
Role_of_BRCA1_in_DNA_Damage_Response	Inhibition_of_Matrix_Metalloproteases	0.33087337383407
Role_of_BRCA1_in_DNA_Damage_Response	Role_of_JAK2_in_Hormone-like_Cytokine_Signaling	0.33091305741737
Role_of_BRCA1_in_DNA_Damage_Response	DNA_damage-induced_14-3-3__Signaling	0.33091632916053
Role_of_BRCA1_in_DNA_Damage_Response	Basal_Cell_Carcinoma_Signaling	0.330952125265914
Role_of_BRCA1_in_DNA_Damage_Response	Relaxin_Signaling	0.330953164160401
Role_of_BRCA1_in_DNA_Damage_Response	Retinoate_Biosynthesis_I	0.330972911000907
Role_of_BRCA1_in_DNA_Damage_Response	Atherosclerosis_Signaling	0.33107025241368
Role_of_BRCA1_in_DNA_Damage_Response	G_s_Signaling	0.331082525364097
Role_of_BRCA1_in_DNA_Damage_Response	Dopamine_Degradation	0.331116787350679
Role_of_BRCA1_in_DNA_Damage_Response	Thrombopoietin_Signaling	0.331145424234986
Role_of_BRCA1_in_DNA_Damage_Response	Ethanol_Degradation_II	0.331163322287678
Role_of_BRCA1_in_DNA_Damage_Response	TWEAK_Signaling	0.331166901898216
Role_of_BRCA1_in_DNA_Damage_Response	Eicosanoid_Signaling	0.331217016445754
Role_of_BRCA1_in_DNA_Damage_Response	Endothelin-1_Signaling	0.33122417566683
Role_of_BRCA1_in_DNA_Damage_Response	Gap_Junction_Signaling	0.33122417566683
Role_of_BRCA1_in_DNA_Damage_Response	Synaptic_Long_Term_Depression	0.33122417566683
Role_of_BRCA1_in_DNA_Damage_Response	Dendritic_Cell_Maturation	0.33122417566683
Role_of_BRCA1_in_DNA_Damage_Response	Leukocyte_Extravasation_Signaling	0.33122417566683
Role_of_BRCA1_in_DNA_Damage_Response	Ovarian_Cancer_Signaling	0.33131366593029
Role_of_BRCA1_in_DNA_Damage_Response	Factors_Promoting_Cardiogenesis_in_Vertebrates	0.331349467418546
Role_of_BRCA1_in_DNA_Damage_Response	Histamine_Degradation	0.331360200867289
Role_of_BRCA1_in_DNA_Damage_Response	Noradrenaline_and_Adrenaline_Degradation	0.331360200867289
Role_of_BRCA1_in_DNA_Damage_Response	Agranulocyte_Adhesion_and_Diapedesis	0.331399576583211
Role_of_BRCA1_in_DNA_Damage_Response	RAR_Activation	0.331399576583211
Role_of_BRCA1_in_DNA_Damage_Response	LPS/IL-1_Mediated_Inhibition_of_RXR_Function	0.331399576583211
Role_of_BRCA1_in_DNA_Damage_Response	Oncostatin_M_Signaling	0.331399576583211
Role_of_BRCA1_in_DNA_Damage_Response	Tryptophan_Degradation_to_2-amino-3-carboxymuconate_Semialdehyde	0.331399576583211
Role_of_BRCA1_in_DNA_Damage_Response	Actin_Cytoskeleton_Signaling	0.331481907625593
Role_of_BRCA1_in_DNA_Damage_Response	Integrin_Signaling	0.331481907625593
Role_of_BRCA1_in_DNA_Damage_Response	CREB_Signaling_in_Neurons	0.331481907625593
Role_of_BRCA1_in_DNA_Damage_Response	G_Beta_Gamma_Signaling	0.331569352397316
Role_of_BRCA1_in_DNA_Damage_Response	Hepatic_Fibrosis_/_Hepatic_Stellate_Cell_Activation	0.331600034773359
Role_of_BRCA1_in_DNA_Damage_Response	Sperm_Motility	0.331600034773359
Role_of_BRCA1_in_DNA_Damage_Response	ILK_Signaling	0.331600034773359
Role_of_BRCA1_in_DNA_Damage_Response	RhoGDI_Signaling	0.331625092047128
Role_of_BRCA1_in_DNA_Damage_Response	GDNF_Family_Ligand-Receptor_Interactions	0.331671626984127
Role_of_Macrophages,_Fibroblasts_and_Endothelial_Cells_in_Rheumatoid_Arthritis	Role_of_BRCA1_in_DNA_Damage_Response	0.331680146975178
Role_of_BRCA1_in_DNA_Damage_Response	Induction_of_Apoptosis_by_HIV1	0.331750378415971
Role_of_BRCA1_in_DNA_Damage_Response	IL-8_Signaling	0.331771856079201
Role_of_BRCA1_in_DNA_Damage_Response	Cardiac_Hypertrophy_Signaling	0.331771856079201
Role_of_BRCA1_in_DNA_Damage_Response	CDK5_Signaling	0.331771856079201
Role_of_BRCA1_in_DNA_Damage_Response	Extrinsic_Prothrombin_Activation_Pathway	0.331905835787923
Role_of_BRCA1_in_DNA_Damage_Response	Glycogen_Degradation_II	0.332013224104075
Role_of_BRCA1_in_DNA_Damage_Response	Role_of_CHK_Proteins_in_Cell_Cycle_Checkpoint_Control	0.332081236704304
Role_of_BRCA1_in_DNA_Damage_Response	Cardiac__-adrenergic_Signaling	0.332119078301424
Role_of_BRCA1_in_DNA_Damage_Response	Role_of_IL-17A_in_Psoriasis	0.332170726967763
Role_of_BRCA1_in_DNA_Damage_Response	tRNA_Splicing	0.332170726967763
Role_of_BRCA1_in_DNA_Damage_Response	Wnt/_-catenin_Signaling	0.332247944280805
Role_of_BRCA1_in_DNA_Damage_Response	Macropinocytosis_Signaling	0.33237476476845
Role_of_BRCA1_in_DNA_Damage_Response	Thyroid_Cancer_Signaling	0.332636076337752
Role_of_BRCA1_in_DNA_Damage_Response	Estrogen_Receptor_Signaling	0.332683531746032
Role_of_BRCA1_in_DNA_Damage_Response	Breast_Cancer_Regulation_by_Stathmin1	0.333422823596793
Role_of_BRCA1_in_DNA_Damage_Response	Oxidative_Ethanol_Degradation_III	0.333527655048274
Growth_Hormone_Signaling	NAD_biosynthesis_II_(from_tryptophan)	0.333661702175026
NAD_biosynthesis_II_(from_tryptophan)	Ephrin_Receptor_Signaling	0.333777163295362
Ephrin_Receptor_Signaling	Protein_Kinase_A_Signaling	0.334257561640267
Growth_Hormone_Signaling	Protein_Kinase_A_Signaling	0.334701351321267
Role_of_BRCA1_in_DNA_Damage_Response	_-Adrenergic_Signaling	0.334928467000835
Role_of_BRCA1_in_DNA_Damage_Response	Mismatch_Repair_in_Eukaryotes	0.335134189640769
NAD_biosynthesis_II_(from_tryptophan)	CXCR4_Signaling	0.335454593931638
NAD_biosynthesis_II_(from_tryptophan)	Cellular_Effects_of_Sildenafil_(Viagra)	0.335835481099656
Cellular_Effects_of_Sildenafil_(Viagra)	Protein_Kinase_A_Signaling	0.335922925871379
Axonal_Guidance_Signaling	NAD_biosynthesis_II_(from_tryptophan)	0.336002700049092
NAD_biosynthesis_II_(from_tryptophan)	Human_Embryonic_Stem_Cell_Pluripotency	0.336295873283039
NAD_biosynthesis_II_(from_tryptophan)	Tryptophan_Degradation_X_(Mammalian,_via_Tryptamine)	0.336419604660716
NAD_biosynthesis_II_(from_tryptophan)	Acute_Phase_Response_Signaling	0.336433129953012
NAD_biosynthesis_II_(from_tryptophan)	TR/RXR_Activation	0.336457675853847
Human_Embryonic_Stem_Cell_Pluripotency	Protein_Kinase_A_Signaling	0.336480218007674
Axonal_Guidance_Signaling	Protein_Kinase_A_Signaling	0.336536573392243
NAD_biosynthesis_II_(from_tryptophan)	Calcium_Signaling	0.336562371634957
Protein_Ubiquitination_Pathway	Protein_Kinase_A_Signaling	0.336721179021437
Tryptophan_Degradation_X_(Mammalian,_via_Tryptamine)	Protein_Kinase_A_Signaling	0.336817348441586
NAD_biosynthesis_II_(from_tryptophan)	Intrinsic_Prothrombin_Activation_Pathway	0.336841351660939
HIF1__Signaling	NAD_biosynthesis_II_(from_tryptophan)	0.336988115693013
Role_of_Macrophages,_Fibroblasts_and_Endothelial_Cells_in_Rheumatoid_Arthritis	NAD_biosynthesis_II_(from_tryptophan)	0.337032213539927
NAD_biosynthesis_II_(from_tryptophan)	P2Y_Purigenic_Receptor_Signaling_Pathway	0.337102381453318
Protein_Kinase_A_Signaling	Calcium_Signaling	0.337104385200325
Fatty_Acid__-oxidation	Protein_Kinase_A_Signaling	0.337109895504594
NAD_biosynthesis_II_(from_tryptophan)	Bladder_Cancer_Signaling	0.337126927354152
TR/RXR_Activation	Protein_Kinase_A_Signaling	0.337220101589973
NAD_biosynthesis_II_(from_tryptophan)	Assembly_of_RNA_Polymerase_II_Complex	0.337249656858325
CXCR4_Signaling	Protein_Kinase_A_Signaling	0.337254039353703
Intrinsic_Prothrombin_Activation_Pathway	Protein_Kinase_A_Signaling	0.337256586483391
NAD_biosynthesis_II_(from_tryptophan)	Fatty_Acid__-oxidation	0.337362868564215
NAD_biosynthesis_II_(from_tryptophan)	Role_of_Osteoblasts,_Osteoclasts_and_Chondrocytes_in_Rheumatoid_Arthritis	0.337386412591546
Acute_Phase_Response_Signaling	Protein_Kinase_A_Signaling	0.337428992215443
Role_of_BRCA1_in_DNA_Damage_Response	Caveolar-mediated_Endocytosis_Signaling	0.337484914498445
Role_of_BRCA1_in_DNA_Damage_Response	Regulation_of_eIF4_and_p70S6K_Signaling	0.337484914498445
Bladder_Cancer_Signaling	Protein_Kinase_A_Signaling	0.33750062617094
HIF1__Signaling	Protein_Kinase_A_Signaling	0.337565967108493
NAD_biosynthesis_II_(from_tryptophan)	cAMP-mediated_signaling	0.337569254505926
Role_of_Osteoblasts,_Osteoclasts_and_Chondrocytes_in_Rheumatoid_Arthritis	Protein_Kinase_A_Signaling	0.337661927804995
P2Y_Purigenic_Receptor_Signaling_Pathway	Protein_Kinase_A_Signaling	0.337689980263092
Assembly_of_RNA_Polymerase_II_Complex	Protein_Kinase_A_Signaling	0.337714526163927
Coagulation_System	Intrinsic_Prothrombin_Activation_Pathway	0.337850933098016
NAD_biosynthesis_II_(from_tryptophan)	Salvage_Pathways_of_Pyrimidine_Deoxyribonucleotides	0.337954474868003
NAD_biosynthesis_II_(from_tryptophan)	Putrescine_Degradation_III	0.337968501097051
CXCR4_Signaling	Retinoate_Biosynthesis_I	0.337970290968187
Putrescine_Degradation_III	Protein_Kinase_A_Signaling	0.338016090088465
NAD_biosynthesis_II_(from_tryptophan)	Protein_Ubiquitination_Pathway	0.338035918834888
NAD_biosynthesis_II_(from_tryptophan)	Coagulation_System	0.338045646029969
Protein_Kinase_A_Signaling	cAMP-mediated_signaling	0.338138819592638
Ethanol_Degradation_IV	Protein_Kinase_A_Signaling	0.338169877671245
NAD_biosynthesis_II_(from_tryptophan)	tRNA_Charging	0.338262144723511
Protein_Kinase_A_Signaling	Salvage_Pathways_of_Pyrimidine_Deoxyribonucleotides	0.338314147455742
NAD_biosynthesis_II_(from_tryptophan)	EIF2_Signaling	0.338385781411239
Protein_Kinase_A_Signaling	Leptin_Signaling_in_Obesity	0.338487972508591
Coagulation_System	Protein_Kinase_A_Signaling	0.338501039833627
Role_of_Macrophages,_Fibroblasts_and_Endothelial_Cells_in_Rheumatoid_Arthritis	Protein_Kinase_A_Signaling	0.338532135621897
NAD_biosynthesis_II_(from_tryptophan)	Colorectal_Cancer_Metastasis_Signaling	0.338585655175178
Protein_Kinase_A_Signaling	Epithelial_Adherens_Junction_Signaling	0.338650776952902
Protein_Kinase_A_Signaling	Nitric_Oxide_Signaling_in_the_Cardiovascular_System	0.338724414655406
NAD_biosynthesis_II_(from_tryptophan)	Regulation_of_the_Epithelial-Mesenchymal_Transition_Pathway	0.338796048610902
Colorectal_Cancer_Metastasis_Signaling	Protein_Kinase_A_Signaling	0.338829611373268
Protein_Kinase_A_Signaling	EIF2_Signaling	0.338840131045054
NAD_biosynthesis_II_(from_tryptophan)	Thrombin_Signaling	0.338964363359482
NAD_biosynthesis_II_(from_tryptophan)	Antigen_Presentation_Pathway	0.338988909260317
NAD_biosynthesis_II_(from_tryptophan)	Glioma_Invasiveness_Signaling	0.338988909260317
NAD_biosynthesis_II_(from_tryptophan)	Role_of_Tissue_Factor_in_Cancer	0.339069560077345
NAD_biosynthesis_II_(from_tryptophan)	Cell_Cycle_Control_of_Chromosomal_Replication	0.339083586306393
NAD_biosynthesis_II_(from_tryptophan)	VDR/RXR_Activation	0.339104625649965
NAD_biosynthesis_II_(from_tryptophan)	Epithelial_Adherens_Junction_Signaling	0.339118651879014
Protein_Kinase_A_Signaling	Thrombin_Signaling	0.339145201526855
NAD_biosynthesis_II_(from_tryptophan)	Glioblastoma_Multiforme_Signaling	0.339167743680683
NAD_biosynthesis_II_(from_tryptophan)	Prolactin_Signaling	0.339174756795207
NAD_biosynthesis_II_(from_tryptophan)	Nitric_Oxide_Signaling_in_the_Cardiovascular_System	0.339216835482352
NAD_biosynthesis_II_(from_tryptophan)	Inhibition_of_Matrix_Metalloproteases	0.3392308617114
Protein_Kinase_A_Signaling	Regulation_of_the_Epithelial-Mesenchymal_Transition_Pathway	0.339243385130193
NAD_biosynthesis_II_(from_tryptophan)	Basal_Cell_Carcinoma_Signaling	0.339262420726759
NAD_biosynthesis_II_(from_tryptophan)	Relaxin_Signaling	0.339285714285714
Protein_Kinase_A_Signaling	Antigen_Presentation_Pathway	0.33933806217627
Protein_Kinase_A_Signaling	Glioma_Invasiveness_Signaling	0.33933806217627
Protein_Kinase_A_Signaling	Prolactin_Signaling	0.339366114634366
Glycine_Betaine_Degradation	Protein_Kinase_A_Signaling	0.339383647420677
Protein_Kinase_A_Signaling	Cell_Cycle_Control_of_Chromosomal_Replication	0.339397673649725
Protein_Kinase_A_Signaling	Dopamine_Degradation	0.339404686764249
NAD_biosynthesis_II_(from_tryptophan)	Atherosclerosis_Signaling	0.339413202689028
Protein_Kinase_A_Signaling	Role_of_Tissue_Factor_in_Cancer	0.339418712993297
NAD_biosynthesis_II_(from_tryptophan)	Retinoate_Biosynthesis_I	0.339446532999165
NAD_biosynthesis_II_(from_tryptophan)	G_s_Signaling	0.339447767324898
NAD_biosynthesis_II_(from_tryptophan)	Wnt/_-catenin_Signaling	0.339462294490698
Protein_Kinase_A_Signaling	VDR/RXR_Activation	0.339488844138539
Protein_Kinase_A_Signaling	Histamine_Degradation	0.339544949054732
Protein_Kinase_A_Signaling	Noradrenaline_and_Adrenaline_Degradation	0.339544949054732
Glioblastoma_Multiforme_Signaling	Protein_Kinase_A_Signaling	0.339551962169256
NAD_biosynthesis_II_(from_tryptophan)	Endothelin-1_Signaling	0.339556971536774
NAD_biosynthesis_II_(from_tryptophan)	Gap_Junction_Signaling	0.339556971536774
NAD_biosynthesis_II_(from_tryptophan)	Synaptic_Long_Term_Depression	0.339556971536774
NAD_biosynthesis_II_(from_tryptophan)	Dendritic_Cell_Maturation	0.339556971536774
NAD_biosynthesis_II_(from_tryptophan)	Leukocyte_Extravasation_Signaling	0.339556971536774
Inhibition_of_Matrix_Metalloproteases	Protein_Kinase_A_Signaling	0.339573001512829
Growth_Hormone_Signaling	Ephrin_Receptor_Signaling	0.339578185177764
NAD_biosynthesis_II_(from_tryptophan)	DNA_damage-induced_14-3-3__Signaling	0.33958502399487
NAD_biosynthesis_II_(from_tryptophan)	TWEAK_Signaling	0.339616583010229
NAD_biosynthesis_II_(from_tryptophan)	Ovarian_Cancer_Signaling	0.339655155140112
NAD_biosynthesis_II_(from_tryptophan)	Dopamine_Degradation	0.339655155140112
Protein_Kinase_A_Signaling	Basal_Cell_Carcinoma_Signaling	0.339674691673429
NAD_biosynthesis_II_(from_tryptophan)	Agranulocyte_Adhesion_and_Diapedesis	0.339676194483684
NAD_biosynthesis_II_(from_tryptophan)	RAR_Activation	0.339676194483684
NAD_biosynthesis_II_(from_tryptophan)	LPS/IL-1_Mediated_Inhibition_of_RXR_Function	0.339676194483684
NAD_biosynthesis_II_(from_tryptophan)	Oncostatin_M_Signaling	0.339676194483684
NAD_biosynthesis_II_(from_tryptophan)	Tryptophan_Degradation_to_2-amino-3-carboxymuconate_Semialdehyde	0.339676194483684
Relaxin_Signaling	Protein_Kinase_A_Signaling	0.339756688757977
Protein_Kinase_A_Signaling	DNA_damage-induced_14-3-3__Signaling	0.33977638183403
NAD_biosynthesis_II_(from_tryptophan)	Factors_Promoting_Cardiogenesis_in_Vertebrates	0.339779189167076
NAD_biosynthesis_II_(from_tryptophan)	Histamine_Degradation	0.339795417430595
NAD_biosynthesis_II_(from_tryptophan)	Role_of_JAK2_in_Hormone-like_Cytokine_Signaling	0.339795417430595
NAD_biosynthesis_II_(from_tryptophan)	Noradrenaline_and_Adrenaline_Degradation	0.339795417430595
NAD_biosynthesis_II_(from_tryptophan)	Actin_Cytoskeleton_Signaling	0.339798923987857
NAD_biosynthesis_II_(from_tryptophan)	Integrin_Signaling	0.339798923987857
NAD_biosynthesis_II_(from_tryptophan)	CREB_Signaling_in_Neurons	0.339798923987857
Protein_Kinase_A_Signaling	Wnt/_-catenin_Signaling	0.339828980192961
NAD_biosynthesis_II_(from_tryptophan)	Thrombopoietin_Signaling	0.339851021410037
Atherosclerosis_Signaling	Protein_Kinase_A_Signaling	0.339853526093795
Protein_Kinase_A_Signaling	Ethanol_Degradation_II	0.339857032651057
Protein_Kinase_A_Signaling	G_s_Signaling	0.339865548575837
Protein_Kinase_A_Signaling	TWEAK_Signaling	0.339885085109154
Protein_Kinase_A_Signaling	Endothelin-1_Signaling	0.339906124452727
Protein_Kinase_A_Signaling	Gap_Junction_Signaling	0.339906124452727
Protein_Kinase_A_Signaling	Synaptic_Long_Term_Depression	0.339906124452727
Protein_Kinase_A_Signaling	Dendritic_Cell_Maturation	0.339906124452727
Protein_Kinase_A_Signaling	Leukocyte_Extravasation_Signaling	0.339906124452727
Protein_Kinase_A_Signaling	Eicosanoid_Signaling	0.339909631009989
NAD_biosynthesis_II_(from_tryptophan)	G_Beta_Gamma_Signaling	0.33992465911254
Protein_Kinase_A_Signaling	Thrombopoietin_Signaling	0.339927163796299
NAD_biosynthesis_II_(from_tryptophan)	Hepatic_Fibrosis_/_Hepatic_Stellate_Cell_Activation	0.339942692835603
NAD_biosynthesis_II_(from_tryptophan)	Sperm_Motility	0.339942692835603
NAD_biosynthesis_II_(from_tryptophan)	ILK_Signaling	0.339942692835603
Protein_Kinase_A_Signaling	Agranulocyte_Adhesion_and_Diapedesis	0.339969242483444
Protein_Kinase_A_Signaling	RAR_Activation	0.339969242483444
Protein_Kinase_A_Signaling	LPS/IL-1_Mediated_Inhibition_of_RXR_Function	0.339969242483444
Protein_Kinase_A_Signaling	Oncostatin_M_Signaling	0.339969242483444
Protein_Kinase_A_Signaling	Tryptophan_Degradation_to_2-amino-3-carboxymuconate_Semialdehyde	0.339969242483444
NAD_biosynthesis_II_(from_tryptophan)	Leptin_Signaling_in_Obesity	0.339994790257782
Retinoate_Biosynthesis_I	Protein_Kinase_A_Signaling	0.3399973893066
NAD_biosynthesis_II_(from_tryptophan)	GDNF_Family_Ligand-Receptor_Interactions	0.34000581086632
Protein_Kinase_A_Signaling	Ovarian_Cancer_Signaling	0.340039373628686
NAD_biosynthesis_II_(from_tryptophan)	IL-8_Signaling	0.340093474797872
NAD_biosynthesis_II_(from_tryptophan)	Cardiac_Hypertrophy_Signaling	0.340093474797872
NAD_biosynthesis_II_(from_tryptophan)	CDK5_Signaling	0.340093474797872
NAD_biosynthesis_II_(from_tryptophan)	Induction_of_Apoptosis_by_HIV1	0.340100487912396
Ethanol_Degradation_IV	Ethanol_Degradation_II	0.340139060042279
Protein_Kinase_A_Signaling	Role_of_JAK2_in_Hormone-like_Cytokine_Signaling	0.340162103132858
NAD_biosynthesis_II_(from_tryptophan)	Extrinsic_Prothrombin_Activation_Pathway	0.340182641539679
Protein_Kinase_A_Signaling	Actin_Cytoskeleton_Signaling	0.340256780178935
Protein_Kinase_A_Signaling	Integrin_Signaling	0.340256780178935
Protein_Kinase_A_Signaling	CREB_Signaling_in_Neurons	0.340256780178935
Protein_Kinase_A_Signaling	Hepatic_Fibrosis_/_Hepatic_Stellate_Cell_Activation	0.340284832637031
Protein_Kinase_A_Signaling	Sperm_Motility	0.340284832637031
Protein_Kinase_A_Signaling	ILK_Signaling	0.340284832637031
NAD_biosynthesis_II_(from_tryptophan)	Glycogen_Degradation_II	0.340287838257542
Factors_Promoting_Cardiogenesis_in_Vertebrates	Protein_Kinase_A_Signaling	0.340334540173458
Protein_Kinase_A_Signaling	G_Beta_Gamma_Signaling	0.34034244036348
Protein_Kinase_A_Signaling	RhoGDI_Signaling	0.340361976896797
tRNA_Charging	Protein_Kinase_A_Signaling	0.340371140617501
Protein_Kinase_A_Signaling	Induction_of_Apoptosis_by_HIV1	0.340376003125845
Protein_Kinase_A_Signaling	GDNF_Family_Ligand-Receptor_Interactions	0.340390029354894
NAD_biosynthesis_II_(from_tryptophan)	RhoGDI_Signaling	0.340398044342921
NAD_biosynthesis_II_(from_tryptophan)	Cardiac__-adrenergic_Signaling	0.340423091180508
NAD_biosynthesis_II_(from_tryptophan)	Role_of_CHK_Proteins_in_Cell_Cycle_Checkpoint_Control	0.340438620219811
NAD_biosynthesis_II_(from_tryptophan)	Role_of_IL-17A_in_Psoriasis	0.340482201717211
NAD_biosynthesis_II_(from_tryptophan)	tRNA_Splicing	0.340482201717211
Protein_Kinase_A_Signaling	Extrinsic_Prothrombin_Activation_Pathway	0.340540811317163
Protein_Kinase_A_Signaling	IL-8_Signaling	0.34056886377526
Protein_Kinase_A_Signaling	Cardiac_Hypertrophy_Signaling	0.34056886377526
Protein_Kinase_A_Signaling	CDK5_Signaling	0.34056886377526
Protein_Kinase_A_Signaling	Role_of_CHK_Proteins_in_Cell_Cycle_Checkpoint_Control	0.340624968691453
Protein_Kinase_A_Signaling	Glycogen_Degradation_II	0.340646008035025
NAD_biosynthesis_II_(from_tryptophan)	Macropinocytosis_Signaling	0.340713634496508
Protein_Kinase_A_Signaling	Cardiac__-adrenergic_Signaling	0.340807309669081
Protein_Kinase_A_Signaling	Role_of_IL-17A_in_Psoriasis	0.34088245018184
Protein_Kinase_A_Signaling	tRNA_Splicing	0.34088245018184
NAD_biosynthesis_II_(from_tryptophan)	Thyroid_Cancer_Signaling	0.340962600062116
NAD_biosynthesis_II_(from_tryptophan)	Eicosanoid_Signaling	0.340991153456965
Cellular_Effects_of_Sildenafil_(Viagra)	Ephrin_Receptor_Signaling	0.341033331287842
NAD_biosynthesis_II_(from_tryptophan)	Glycine_Betaine_Degradation	0.341054041891671
NAD_biosynthesis_II_(from_tryptophan)	Estrogen_Receptor_Signaling	0.34106784896089
Protein_Kinase_A_Signaling	Macropinocytosis_Signaling	0.341131415747448
NAD_biosynthesis_II_(from_tryptophan)	Caveolar-mediated_Endocytosis_Signaling	0.341192530031158
NAD_biosynthesis_II_(from_tryptophan)	Regulation_of_eIF4_and_p70S6K_Signaling	0.341192530031158
Growth_Hormone_Signaling	Acute_Phase_Response_Signaling	0.341332453972706
Ephrin_Receptor_Signaling	Protein_Ubiquitination_Pathway	0.341369814678449
Protein_Kinase_A_Signaling	Thyroid_Cancer_Signaling	0.341380381313055
CXCR4_Signaling	Ephrin_Receptor_Signaling	0.341484829094012
Protein_Kinase_A_Signaling	Caveolar-mediated_Endocytosis_Signaling	0.341557712923166
Protein_Kinase_A_Signaling	Regulation_of_eIF4_and_p70S6K_Signaling	0.341557712923166
Ephrin_Receptor_Signaling	Human_Embryonic_Stem_Cell_Pluripotency	0.341602045825694
Estrogen_Receptor_Signaling	Protein_Kinase_A_Signaling	0.341637518409426
Growth_Hormone_Signaling	Cellular_Effects_of_Sildenafil_(Viagra)	0.341649318590312
Acute_Phase_Response_Signaling	Ephrin_Receptor_Signaling	0.341683197579474
Growth_Hormone_Signaling	CXCR4_Signaling	0.341706795077582
Ephrin_Receptor_Signaling	TR/RXR_Activation	0.341749321230701
NAD_biosynthesis_II_(from_tryptophan)	Breast_Cancer_Regulation_by_Stathmin1	0.341761093244367
NAD_biosynthesis_II_(from_tryptophan)	Ethanol_Degradation_II	0.34190561349724
NAD_biosynthesis_II_(from_tryptophan)	Oxidative_Ethanol_Degradation_III	0.34190561349724
Ephrin_Receptor_Signaling	Tryptophan_Degradation_X_(Mammalian,_via_Tryptamine)	0.341907617244247
Ephrin_Receptor_Signaling	Calcium_Signaling	0.34194919499464
Growth_Hormone_Signaling	Tryptophan_Degradation_X_(Mammalian,_via_Tryptamine)	0.342063213784813
Protein_Kinase_A_Signaling	Oxidative_Ethanol_Degradation_III	0.342106739603058
Ephrin_Receptor_Signaling	Fatty_Acid__-oxidation	0.342189644635468
Ephrin_Receptor_Signaling	Assembly_of_RNA_Polymerase_II_Complex	0.342464658912166
Ephrin_Receptor_Signaling	Bladder_Cancer_Signaling	0.342520763828359
Ephrin_Receptor_Signaling	Intrinsic_Prothrombin_Activation_Pathway	0.342561824987727
Growth_Hormone_Signaling	Calcium_Signaling	0.342573020325475
Growth_Hormone_Signaling	TR/RXR_Activation	0.34258470803001
HIF1__Signaling	Ephrin_Receptor_Signaling	0.342654894861725
Cellular_Effects_of_Sildenafil_(Viagra)	Calcium_Signaling	0.342682509000164
Ephrin_Receptor_Signaling	Role_of_Osteoblasts,_Osteoclasts_and_Chondrocytes_in_Rheumatoid_Arthritis	0.342696091691463
Acute_Phase_Response_Signaling	CXCR4_Signaling	0.342730229829894
CXCR4_Signaling	Cellular_Effects_of_Sildenafil_(Viagra)	0.342765085901668
Growth_Hormone_Signaling	Fatty_Acid__-oxidation	0.342785625236537
Ephrin_Receptor_Signaling	P2Y_Purigenic_Receptor_Signaling_Pathway	0.34295056756134
Axonal_Guidance_Signaling	Cellular_Effects_of_Sildenafil_(Viagra)	0.342987416457811
Growth_Hormone_Signaling	P2Y_Purigenic_Receptor_Signaling_Pathway	0.343079487521984
Ephrin_Receptor_Signaling	Putrescine_Degradation_III	0.343151944135533
Acute_Phase_Response_Signaling	Cellular_Effects_of_Sildenafil_(Viagra)	0.343168313287514
HIF1__Signaling	Axonal_Guidance_Signaling	0.343170164995823
Ephrin_Receptor_Signaling	cAMP-mediated_signaling	0.343172983479106
Growth_Hormone_Signaling	Axonal_Guidance_Signaling	0.343211783040976
Axonal_Guidance_Signaling	Protein_Ubiquitination_Pathway	0.343246919381788
Growth_Hormone_Signaling	Assembly_of_RNA_Polymerase_II_Complex	0.343250907188495
Growth_Hormone_Signaling	Role_of_Osteoblasts,_Osteoclasts_and_Chondrocytes_in_Rheumatoid_Arthritis	0.34326259489303
Ephrin_Receptor_Signaling	Ethanol_Degradation_IV	0.343277679260217
Cellular_Effects_of_Sildenafil_(Viagra)	Protein_Ubiquitination_Pathway	0.343314797410192
NAD_biosynthesis_II_(from_tryptophan)	_-Adrenergic_Signaling	0.343335787923417
Cellular_Effects_of_Sildenafil_(Viagra)	Tryptophan_Degradation_X_(Mammalian,_via_Tryptamine)	0.343374396579938
Ephrin_Receptor_Signaling	Salvage_Pathways_of_Pyrimidine_Deoxyribonucleotides	0.343404416258403
CXCR4_Signaling	Human_Embryonic_Stem_Cell_Pluripotency	0.343420786007572
CXCR4_Signaling	Protein_Ubiquitination_Pathway	0.343450882984171
Growth_Hormone_Signaling	Bladder_Cancer_Signaling	0.343469077673145
Cellular_Effects_of_Sildenafil_(Viagra)	Human_Embryonic_Stem_Cell_Pluripotency	0.343506330796924
Coagulation_System	Ephrin_Receptor_Signaling	0.343604489948275
CXCR4_Signaling	Tryptophan_Degradation_X_(Mammalian,_via_Tryptamine)	0.343606889564336
Fatty_Acid__-oxidation	Tryptophan_Degradation_X_(Mammalian,_via_Tryptamine)	0.343626331239418
Role_of_Macrophages,_Fibroblasts_and_Endothelial_Cells_in_Rheumatoid_Arthritis	Ephrin_Receptor_Signaling	0.343630479307197
Protein_Kinase_A_Signaling	Mismatch_Repair_in_Eukaryotes	0.343635452462772
Growth_Hormone_Signaling	Human_Embryonic_Stem_Cell_Pluripotency	0.343656080945702
Axonal_Guidance_Signaling	Human_Embryonic_Stem_Cell_Pluripotency	0.343658208558337
Cellular_Effects_of_Sildenafil_(Viagra)	Fatty_Acid__-oxidation	0.343673038373425
Ephrin_Receptor_Signaling	Epithelial_Adherens_Junction_Signaling	0.343741045755563
Ephrin_Receptor_Signaling	Nitric_Oxide_Signaling_in_the_Cardiovascular_System	0.343751565427349
Acute_Phase_Response_Signaling	Human_Embryonic_Stem_Cell_Pluripotency	0.343753068237604
Axonal_Guidance_Signaling	CXCR4_Signaling	0.343818566090357
Growth_Hormone_Signaling	Protein_Ubiquitination_Pathway	0.343839157736673
Cellular_Effects_of_Sildenafil_(Viagra)	Bladder_Cancer_Signaling	0.343839745949926
Protein_Ubiquitination_Pathway	Human_Embryonic_Stem_Cell_Pluripotency	0.343849973408607
Cellular_Effects_of_Sildenafil_(Viagra)	Intrinsic_Prothrombin_Activation_Pathway	0.343855733082707
Cellular_Effects_of_Sildenafil_(Viagra)	Role_of_Osteoblasts,_Osteoclasts_and_Chondrocytes_in_Rheumatoid_Arthritis	0.343884235395189
Growth_Hormone_Signaling	HIF1__Signaling	0.343894899096762
Growth_Hormone_Signaling	cAMP-mediated_signaling	0.343901522740934
Axonal_Guidance_Signaling	Tryptophan_Degradation_X_(Mammalian,_via_Tryptamine)	0.343902133447881
Ephrin_Receptor_Signaling	EIF2_Signaling	0.343930399847715
Growth_Hormone_Signaling	Intrinsic_Prothrombin_Activation_Pathway	0.34393869587969
Cellular_Effects_of_Sildenafil_(Viagra)	P2Y_Purigenic_Receptor_Signaling_Pathway	0.343939463672067
Ephrin_Receptor_Signaling	Colorectal_Cancer_Metastasis_Signaling	0.343947932634026
CXCR4_Signaling	Calcium_Signaling	0.343973230949715
Growth_Hormone_Signaling	Ethanol_Degradation_IV	0.343990571918342
HIF1__Signaling	Cellular_Effects_of_Sildenafil_(Viagra)	0.343990967000835
Human_Embryonic_Stem_Cell_Pluripotency	Calcium_Signaling	0.344007043170729
Protein_Ubiquitination_Pathway	TR/RXR_Activation	0.344009521764032
Human_Embryonic_Stem_Cell_Pluripotency	Tryptophan_Degradation_X_(Mammalian,_via_Tryptamine)	0.344025076893791
NAD_biosynthesis_II_(from_tryptophan)	Corticotropin_Releasing_Hormone_Signaling	0.344041353383459
Acute_Phase_Response_Signaling	Protein_Ubiquitination_Pathway	0.344066795532646
CXCR4_Signaling	Intrinsic_Prothrombin_Activation_Pathway	0.344071314181129
Growth_Hormone_Signaling	tRNA_Charging	0.344079127281374
Growth_Hormone_Signaling	Salvage_Pathways_of_Pyrimidine_Deoxyribonucleotides	0.344096317816514
Cellular_Effects_of_Sildenafil_(Viagra)	Putrescine_Degradation_III	0.344100546146294
Protein_Ubiquitination_Pathway	Tryptophan_Degradation_X_(Mammalian,_via_Tryptamine)	0.34414043323515
Axonal_Guidance_Signaling	TR/RXR_Activation	0.344148615202095
Cellular_Effects_of_Sildenafil_(Viagra)	Assembly_of_RNA_Polymerase_II_Complex	0.344157819914908
Acute_Phase_Response_Signaling	Tryptophan_Degradation_X_(Mammalian,_via_Tryptamine)	0.344160329816757
Axonal_Guidance_Signaling	Calcium_Signaling	0.344162933644248
Human_Embryonic_Stem_Cell_Pluripotency	TR/RXR_Activation	0.344164838247523
Growth_Hormone_Signaling	Putrescine_Degradation_III	0.344178131748258
Axonal_Guidance_Signaling	Fatty_Acid__-oxidation	0.344200775241368
Axonal_Guidance_Signaling	Acute_Phase_Response_Signaling	0.344236571346752
CXCR4_Signaling	Fatty_Acid__-oxidation	0.344244120940649
Human_Embryonic_Stem_Cell_Pluripotency	Fatty_Acid__-oxidation	0.344247492811558
Growth_Hormone_Signaling	Leptin_Signaling_in_Obesity	0.344289443220018
Ephrin_Receptor_Signaling	Regulation_of_the_Epithelial-Mesenchymal_Transition_Pathway	0.344305601474758
Acute_Phase_Response_Signaling	Calcium_Signaling	0.344314117399537
Tryptophan_Degradation_X_(Mammalian,_via_Tryptamine)	Calcium_Signaling	0.34432664081833
CXCR4_Signaling	Bladder_Cancer_Signaling	0.344356103023516
Protein_Ubiquitination_Pathway	Calcium_Signaling	0.34437259654721
Acute_Phase_Response_Signaling	TR/RXR_Activation	0.344394768216565
Cellular_Effects_of_Sildenafil_(Viagra)	TR/RXR_Activation	0.344422711094747
Acute_Phase_Response_Signaling	Fatty_Acid__-oxidation	0.344423321611413
Growth_Hormone_Signaling	Coagulation_System	0.344434007004232
Axonal_Guidance_Signaling	Intrinsic_Prothrombin_Activation_Pathway	0.344445749791145
TR/RXR_Activation	Tryptophan_Degradation_X_(Mammalian,_via_Tryptamine)	0.344449370322503
Human_Embryonic_Stem_Cell_Pluripotency	Intrinsic_Prothrombin_Activation_Pathway	0.344462086810669
Bladder_Cancer_Signaling	Human_Embryonic_Stem_Cell_Pluripotency	0.344473415286586
Ephrin_Receptor_Signaling	Glycine_Betaine_Degradation	0.344473916223338
Ephrin_Receptor_Signaling	Cell_Cycle_Control_of_Chromosomal_Replication	0.344487942452386
Ephrin_Receptor_Signaling	Dopamine_Degradation	0.344512488353221
Protein_Kinase_A_Signaling	Corticotropin_Releasing_Hormone_Signaling	0.344522765246449
Protein_Ubiquitination_Pathway	Fatty_Acid__-oxidation	0.344528565292096
Acute_Phase_Response_Signaling	Intrinsic_Prothrombin_Activation_Pathway	0.344535724513173
Ephrin_Receptor_Signaling	Prolactin_Signaling	0.344537034254055
Axonal_Guidance_Signaling	Bladder_Cancer_Signaling	0.344538792750777
Ephrin_Receptor_Signaling	Role_of_Tissue_Factor_in_Cancer	0.344554567040365
Ephrin_Receptor_Signaling	Antigen_Presentation_Pathway	0.344575606383938
Ephrin_Receptor_Signaling	Glioma_Invasiveness_Signaling	0.344575606383938
HIF1__Signaling	Human_Embryonic_Stem_Cell_Pluripotency	0.344576634347897
Ephrin_Receptor_Signaling	VDR/RXR_Activation	0.344589632612986
TR/RXR_Activation	Calcium_Signaling	0.344596144790759
Role_of_Osteoblasts,_Osteoclasts_and_Chondrocytes_in_Rheumatoid_Arthritis	Human_Embryonic_Stem_Cell_Pluripotency	0.344606664462545
Growth_Hormone_Signaling	Epithelial_Adherens_Junction_Signaling	0.344633952225116
Assembly_of_RNA_Polymerase_II_Complex	Human_Embryonic_Stem_Cell_Pluripotency	0.344638223477904
Assembly_of_RNA_Polymerase_II_Complex	Tryptophan_Degradation_X_(Mammalian,_via_Tryptamine)	0.344645236592428
Axonal_Guidance_Signaling	Ephrin_Receptor_Signaling	0.344648861737678
Ephrin_Receptor_Signaling	Histamine_Degradation	0.344652750643704
Ephrin_Receptor_Signaling	Noradrenaline_and_Adrenaline_Degradation	0.344652750643704
Cellular_Effects_of_Sildenafil_(Viagra)	Ethanol_Degradation_IV	0.344706011700213
Ephrin_Receptor_Signaling	Inhibition_of_Matrix_Metalloproteases	0.344708855559897
Fatty_Acid__-oxidation	Calcium_Signaling	0.344713864927414
CXCR4_Signaling	P2Y_Purigenic_Receptor_Signaling_Pathway	0.344749640057591
TR/RXR_Activation	Fatty_Acid__-oxidation	0.344759450171821
Role_of_Osteoblasts,_Osteoclasts_and_Chondrocytes_in_Rheumatoid_Arthritis	Tryptophan_Degradation_X_(Mammalian,_via_Tryptamine)	0.344763457665835
Growth_Hormone_Signaling	Colorectal_Cancer_Metastasis_Signaling	0.344774204679534
Axonal_Guidance_Signaling	Role_of_Osteoblasts,_Osteoclasts_and_Chondrocytes_in_Rheumatoid_Arthritis	0.34477504704631
Protein_Ubiquitination_Pathway	Intrinsic_Prothrombin_Activation_Pathway	0.344776785714286
Ephrin_Receptor_Signaling	Glioblastoma_Multiforme_Signaling	0.344778986705139
Ephrin_Receptor_Signaling	Basal_Cell_Carcinoma_Signaling	0.344793012934187
HIF1__Signaling	Tryptophan_Degradation_X_(Mammalian,_via_Tryptamine)	0.344795501963672
Axonal_Guidance_Signaling	Assembly_of_RNA_Polymerase_II_Complex	0.344807263541155
Ephrin_Receptor_Signaling	Thrombin_Signaling	0.344810545720497
Growth_Hormone_Signaling	EIF2_Signaling	0.34481316369465
Acute_Phase_Response_Signaling	Role_of_Osteoblasts,_Osteoclasts_and_Chondrocytes_in_Rheumatoid_Arthritis	0.344814052277759
Protein_Ubiquitination_Pathway	Bladder_Cancer_Signaling	0.344820047864507
Acute_Phase_Response_Signaling	P2Y_Purigenic_Receptor_Signaling_Pathway	0.344864646889684
Intrinsic_Prothrombin_Activation_Pathway	Calcium_Signaling	0.34487220790378
Ephrin_Receptor_Signaling	DNA_damage-induced_14-3-3__Signaling	0.344884183423001
Acute_Phase_Response_Signaling	Assembly_of_RNA_Polymerase_II_Complex	0.344885686233256
P2Y_Purigenic_Receptor_Signaling_Pathway	Protein_Ubiquitination_Pathway	0.344916697349043
Cellular_Effects_of_Sildenafil_(Viagra)	cAMP-mediated_signaling	0.344922833824251
HIF1__Signaling	Protein_Ubiquitination_Pathway	0.344930294486216
Protein_Ubiquitination_Pathway	Role_of_Osteoblasts,_Osteoclasts_and_Chondrocytes_in_Rheumatoid_Arthritis	0.344934595401735
Ephrin_Receptor_Signaling	Wnt/_-catenin_Signaling	0.344936781781932
Intrinsic_Prothrombin_Activation_Pathway	Fatty_Acid__-oxidation	0.344947379725086
Axonal_Guidance_Signaling	P2Y_Purigenic_Receptor_Signaling_Pathway	0.344957607183767
Ephrin_Receptor_Signaling	Atherosclerosis_Signaling	0.344961327682767
Ephrin_Receptor_Signaling	Ethanol_Degradation_II	0.344964834240029
Ephrin_Receptor_Signaling	TWEAK_Signaling	0.344975353911815
Protein_Ubiquitination_Pathway	Assembly_of_RNA_Polymerase_II_Complex	0.344977550728195
P2Y_Purigenic_Receptor_Signaling_Pathway	Human_Embryonic_Stem_Cell_Pluripotency	0.344978359532325
Bladder_Cancer_Signaling	Fatty_Acid__-oxidation	0.344993387634877
HIF1__Signaling	Acute_Phase_Response_Signaling	0.344995960153821
Bladder_Cancer_Signaling	Calcium_Signaling	0.344999398875898
Intrinsic_Prothrombin_Activation_Pathway	TR/RXR_Activation	0.345016926444117
Ephrin_Receptor_Signaling	Eicosanoid_Signaling	0.34501743259896
Cellular_Effects_of_Sildenafil_(Viagra)	Salvage_Pathways_of_Pyrimidine_Deoxyribonucleotides	0.345025108411062
P2Y_Purigenic_Receptor_Signaling_Pathway	Tryptophan_Degradation_X_(Mammalian,_via_Tryptamine)	0.345038471942533
Ephrin_Receptor_Signaling	Endothelin-1_Signaling	0.345041978499795
Ephrin_Receptor_Signaling	Gap_Junction_Signaling	0.345041978499795
Ephrin_Receptor_Signaling	Synaptic_Long_Term_Depression	0.345041978499795
Ephrin_Receptor_Signaling	Dendritic_Cell_Maturation	0.345041978499795
Ephrin_Receptor_Signaling	Leukocyte_Extravasation_Signaling	0.345041978499795
Ephrin_Receptor_Signaling	Agranulocyte_Adhesion_and_Diapedesis	0.345059511286105
Ephrin_Receptor_Signaling	RAR_Activation	0.345059511286105
Ephrin_Receptor_Signaling	LPS/IL-1_Mediated_Inhibition_of_RXR_Function	0.345059511286105
Ephrin_Receptor_Signaling	Oncostatin_M_Signaling	0.345059511286105
Ephrin_Receptor_Signaling	Tryptophan_Degradation_to_2-amino-3-carboxymuconate_Semialdehyde	0.345059511286105
Cellular_Effects_of_Sildenafil_(Viagra)	Epithelial_Adherens_Junction_Signaling	0.345067040991654
Coagulation_System	Cellular_Effects_of_Sildenafil_(Viagra)	0.345083123617784
Bladder_Cancer_Signaling	TR/RXR_Activation	0.345097582479236
Cellular_Effects_of_Sildenafil_(Viagra)	Leptin_Signaling_in_Obesity	0.345108462199313
Acute_Phase_Response_Signaling	Bladder_Cancer_Signaling	0.34512763868434
Ephrin_Receptor_Signaling	Ovarian_Cancer_Signaling	0.345129642431347
CXCR4_Signaling	Putrescine_Degradation_III	0.345130379139338
Role_of_Osteoblasts,_Osteoclasts_and_Chondrocytes_in_Rheumatoid_Arthritis	Calcium_Signaling	0.345139661166381
Role_of_Macrophages,_Fibroblasts_and_Endothelial_Cells_in_Rheumatoid_Arthritis	Protein_Ubiquitination_Pathway	0.345154198803267
Growth_Hormone_Signaling	Thrombin_Signaling	0.345156003027672
Axonal_Guidance_Signaling	Putrescine_Degradation_III	0.345179543037146
Human_Embryonic_Stem_Cell_Pluripotency	cAMP-mediated_signaling	0.345199272639837
Role_of_Macrophages,_Fibroblasts_and_Endothelial_Cells_in_Rheumatoid_Arthritis	Cellular_Effects_of_Sildenafil_(Viagra)	0.345209940163356
HIF1__Signaling	Calcium_Signaling	0.345224543855343
Role_of_Osteoblasts,_Osteoclasts_and_Chondrocytes_in_Rheumatoid_Arthritis	TR/RXR_Activation	0.345227325097933
Human_Embryonic_Stem_Cell_Pluripotency	Ethanol_Degradation_IV	0.345230330718444
Role_of_Osteoblasts,_Osteoclasts_and_Chondrocytes_in_Rheumatoid_Arthritis	Fatty_Acid__-oxidation	0.345236341959464
HIF1__Signaling	TR/RXR_Activation	0.345249601129111
Axonal_Guidance_Signaling	cAMP-mediated_signaling	0.345251135247914
Assembly_of_RNA_Polymerase_II_Complex	Fatty_Acid__-oxidation	0.345260887860299
Assembly_of_RNA_Polymerase_II_Complex	TR/RXR_Activation	0.345269403785078
Ephrin_Receptor_Signaling	Role_of_JAK2_in_Hormone-like_Cytokine_Signaling	0.34526990472183
Cellular_Effects_of_Sildenafil_(Viagra)	Nitric_Oxide_Signaling_in_the_Cardiovascular_System	0.34527465840288
CXCR4_Signaling	Ethanol_Degradation_IV	0.345277644465774
CXCR4_Signaling	cAMP-mediated_signaling	0.34527968858316
P2Y_Purigenic_Receptor_Signaling_Pathway	Calcium_Signaling	0.345279923456864
Axonal_Guidance_Signaling	Ethanol_Degradation_IV	0.345289999590902
Growth_Hormone_Signaling	Cell_Cycle_Control_of_Chromosomal_Replication	0.345300151383602
Growth_Hormone_Signaling	Nitric_Oxide_Signaling_in_the_Cardiovascular_System	0.345304047285113
Bladder_Cancer_Signaling	Tryptophan_Degradation_X_(Mammalian,_via_Tryptamine)	0.345304970294451
Protein_Ubiquitination_Pathway	cAMP-mediated_signaling	0.345305340778923
P2Y_Purigenic_Receptor_Signaling_Pathway	Fatty_Acid__-oxidation	0.34531348621923
Human_Embryonic_Stem_Cell_Pluripotency	Leptin_Signaling_in_Obesity	0.345316992776492
Growth_Hormone_Signaling	Glycine_Betaine_Degradation	0.34531963089116
Acute_Phase_Response_Signaling	Putrescine_Degradation_III	0.345334525562802
Assembly_of_RNA_Polymerase_II_Complex	Intrinsic_Prothrombin_Activation_Pathway	0.345338580019637
Ephrin_Receptor_Signaling	Actin_Cytoskeleton_Signaling	0.345347048981596
Ephrin_Receptor_Signaling	Integrin_Signaling	0.345347048981596
Ephrin_Receptor_Signaling	CREB_Signaling_in_Neurons	0.345347048981596
Tryptophan_Degradation_X_(Mammalian,_via_Tryptamine)	cAMP-mediated_signaling	0.345351557412361
Human_Embryonic_Stem_Cell_Pluripotency	Salvage_Pathways_of_Pyrimidine_Deoxyribonucleotides	0.34535706771663
tRNA_Charging	Ephrin_Receptor_Signaling	0.345364741641337
Cellular_Effects_of_Sildenafil_(Viagra)	EIF2_Signaling	0.345367728276878
CXCR4_Signaling	Leptin_Signaling_in_Obesity	0.345378872713699
Growth_Hormone_Signaling	Dopamine_Degradation	0.345381965315345
Putrescine_Degradation_III	Tryptophan_Degradation_X_(Mammalian,_via_Tryptamine)	0.345406660455051
HIF1__Signaling	Intrinsic_Prothrombin_Activation_Pathway	0.345409095655806
Acute_Phase_Response_Signaling	cAMP-mediated_signaling	0.345411669822568
Cellular_Effects_of_Sildenafil_(Viagra)	Colorectal_Cancer_Metastasis_Signaling	0.345417842824415
Ephrin_Receptor_Signaling	Hepatic_Fibrosis_/_Hepatic_Stellate_Cell_Activation	0.345420686684099
Ephrin_Receptor_Signaling	Sperm_Motility	0.345420686684099
Ephrin_Receptor_Signaling	ILK_Signaling	0.345420686684099
Axonal_Guidance_Signaling	Salvage_Pathways_of_Pyrimidine_Deoxyribonucleotides	0.345430115774832
Bladder_Cancer_Signaling	Intrinsic_Prothrombin_Activation_Pathway	0.345432161266568
CXCR4_Signaling	Assembly_of_RNA_Polymerase_II_Complex	0.345432730763078
tRNA_Charging	CXCR4_Signaling	0.345438877892294
Role_of_Osteoblasts,_Osteoclasts_and_Chondrocytes_in_Rheumatoid_Arthritis	Bladder_Cancer_Signaling	0.345460761624237
Role_of_Osteoblasts,_Osteoclasts_and_Chondrocytes_in_Rheumatoid_Arthritis	Intrinsic_Prothrombin_Activation_Pathway	0.345464377761414
Growth_Hormone_Signaling	Prolactin_Signaling	0.345471571050112
Ephrin_Receptor_Signaling	Induction_of_Apoptosis_by_HIV1	0.345476791600293
Acute_Phase_Response_Signaling	Ethanol_Degradation_IV	0.345479546752427
Ephrin_Receptor_Signaling	GDNF_Family_Ligand-Receptor_Interactions	0.345480298157555
CXCR4_Signaling	TR/RXR_Activation	0.34548125633232
Ephrin_Receptor_Signaling	Relaxin_Signaling	0.345486366797578
Ephrin_Receptor_Signaling	RhoGDI_Signaling	0.345487311272079
Growth_Hormone_Signaling	Endothelin-1_Signaling	0.345487847392446
Growth_Hormone_Signaling	Gap_Junction_Signaling	0.345487847392446
Growth_Hormone_Signaling	Synaptic_Long_Term_Depression	0.345487847392446
Growth_Hormone_Signaling	Dendritic_Cell_Maturation	0.345487847392446
Growth_Hormone_Signaling	Leukocyte_Extravasation_Signaling	0.345487847392446
Putrescine_Degradation_III	Protein_Ubiquitination_Pathway	0.345489435035182
CXCR4_Signaling	Salvage_Pathways_of_Pyrimidine_Deoxyribonucleotides	0.345496187276702
Putrescine_Degradation_III	Fatty_Acid__-oxidation	0.345513359983169
Axonal_Guidance_Signaling	Leptin_Signaling_in_Obesity	0.345518071919489
Growth_Hormone_Signaling	Basal_Cell_Carcinoma_Signaling	0.345518321868252
Growth_Hormone_Signaling	Histamine_Degradation	0.34553780137581
Growth_Hormone_Signaling	Noradrenaline_and_Adrenaline_Degradation	0.34553780137581
Ephrin_Receptor_Signaling	Factors_Promoting_Cardiogenesis_in_Vertebrates	0.345541595074456
Role_of_Macrophages,_Fibroblasts_and_Endothelial_Cells_in_Rheumatoid_Arthritis	Role_of_Osteoblasts,_Osteoclasts_and_Chondrocytes_in_Rheumatoid_Arthritis	0.345553106703177
P2Y_Purigenic_Receptor_Signaling_Pathway	Intrinsic_Prothrombin_Activation_Pathway	0.345557447635412
Ephrin_Receptor_Signaling	G_Beta_Gamma_Signaling	0.345569464899362
Ephrin_Receptor_Signaling	G_s_Signaling	0.345569464899362
P2Y_Purigenic_Receptor_Signaling_Pathway	TR/RXR_Activation	0.345570967709617
Acute_Phase_Response_Signaling	Salvage_Pathways_of_Pyrimidine_Deoxyribonucleotides	0.345586997685672
Assembly_of_RNA_Polymerase_II_Complex	Bladder_Cancer_Signaling	0.345592007053189
P2Y_Purigenic_Receptor_Signaling_Pathway	Bladder_Cancer_Signaling	0.345599020167714
tRNA_Charging	TR/RXR_Activation	0.345607369487549
Protein_Ubiquitination_Pathway	Ethanol_Degradation_IV	0.345616255522828
Calcium_Signaling	cAMP-mediated_signaling	0.34562707262581
Growth_Hormone_Signaling	Atherosclerosis_Signaling	0.345631303012088
Growth_Hormone_Signaling	Glioblastoma_Multiforme_Signaling	0.345646886618135
Putrescine_Degradation_III	Calcium_Signaling	0.345655125083907
Protein_Ubiquitination_Pathway	Salvage_Pathways_of_Pyrimidine_Deoxyribonucleotides	0.345668415562101
Growth_Hormone_Signaling	Relaxin_Signaling	0.345682604145337
Coagulation_System	Human_Embryonic_Stem_Cell_Pluripotency	0.345686823441583
Ethanol_Degradation_IV	Tryptophan_Degradation_X_(Mammalian,_via_Tryptamine)	0.345693196277038
Putrescine_Degradation_III	TR/RXR_Activation	0.345700710328314
Human_Embryonic_Stem_Cell_Pluripotency	Nitric_Oxide_Signaling_in_the_Cardiovascular_System	0.345704216885576
Ephrin_Receptor_Signaling	Extrinsic_Prothrombin_Activation_Pathway	0.345706220632583
HIF1__Signaling	P2Y_Purigenic_Receptor_Signaling_Pathway	0.345707791278023
Putrescine_Degradation_III	Human_Embryonic_Stem_Cell_Pluripotency	0.3457112300001
Human_Embryonic_Stem_Cell_Pluripotency	Epithelial_Adherens_Junction_Signaling	0.3457112300001
Cellular_Effects_of_Sildenafil_(Viagra)	Regulation_of_the_Epithelial-Mesenchymal_Transition_Pathway	0.3457149504991
Ephrin_Receptor_Signaling	IL-8_Signaling	0.3457257571659
Ephrin_Receptor_Signaling	Cardiac_Hypertrophy_Signaling	0.3457257571659
Ephrin_Receptor_Signaling	CDK5_Signaling	0.3457257571659
P2Y_Purigenic_Receptor_Signaling_Pathway	Role_of_Osteoblasts,_Osteoclasts_and_Chondrocytes_in_Rheumatoid_Arthritis	0.345732269343673
Growth_Hormone_Signaling	Inhibition_of_Matrix_Metalloproteases	0.345740388254413
CXCR4_Signaling	Coagulation_System	0.345743749004619
Ephrin_Receptor_Signaling	Role_of_CHK_Proteins_in_Cell_Cycle_Checkpoint_Control	0.345755312434252
Growth_Hormone_Signaling	DNA_damage-induced_14-3-3__Signaling	0.345759867761972
Acute_Phase_Response_Signaling	Leptin_Signaling_in_Obesity	0.345760822738521
Role_of_Macrophages,_Fibroblasts_and_Endothelial_Cells_in_Rheumatoid_Arthritis	Human_Embryonic_Stem_Cell_Pluripotency	0.345760980876689
CXCR4_Signaling	Nitric_Oxide_Signaling_in_the_Cardiovascular_System	0.345761211539487
Axonal_Guidance_Signaling	Epithelial_Adherens_Junction_Signaling	0.345773758386516
Colorectal_Cancer_Metastasis_Signaling	Human_Embryonic_Stem_Cell_Pluripotency	0.345774348030818
HIF1__Signaling	Role_of_Osteoblasts,_Osteoclasts_and_Chondrocytes_in_Rheumatoid_Arthritis	0.345786542709867
Assembly_of_RNA_Polymerase_II_Complex	Role_of_Osteoblasts,_Osteoclasts_and_Chondrocytes_in_Rheumatoid_Arthritis	0.34579538737439
Axonal_Guidance_Signaling	Role_of_Macrophages,_Fibroblasts_and_Endothelial_Cells_in_Rheumatoid_Arthritis	0.345796930812459
Ephrin_Receptor_Signaling	Glycogen_Degradation_II	0.345811417350445
Fatty_Acid__-oxidation	cAMP-mediated_signaling	0.345811417350445
HIF1__Signaling	Assembly_of_RNA_Polymerase_II_Complex	0.345818759204713
P2Y_Purigenic_Receptor_Signaling_Pathway	Assembly_of_RNA_Polymerase_II_Complex	0.345819933275225
TR/RXR_Activation	cAMP-mediated_signaling	0.345823439832487
Tryptophan_Degradation_X_(Mammalian,_via_Tryptamine)	Leptin_Signaling_in_Obesity	0.345832957630769
HIF1__Signaling	CXCR4_Signaling	0.345837827237965
Growth_Hormone_Signaling	TWEAK_Signaling	0.345841681693715
Human_Embryonic_Stem_Cell_Pluripotency	EIF2_Signaling	0.345847985733321
Cellular_Effects_of_Sildenafil_(Viagra)	Thrombin_Signaling	0.345850975699558
Growth_Hormone_Signaling	Wnt/_-catenin_Signaling	0.34585336939825
TR/RXR_Activation	Ethanol_Degradation_IV	0.345854497911094
Ethanol_Degradation_IV	Calcium_Signaling	0.345854497911094
Fatty_Acid__-oxidation	Ethanol_Degradation_IV	0.345864015709377
CXCR4_Signaling	EIF2_Signaling	0.345876926358449
Axonal_Guidance_Signaling	Nitric_Oxide_Signaling_in_the_Cardiovascular_System	0.345884726313206
Growth_Hormone_Signaling	Thrombopoietin_Signaling	0.345888432511855
Intrinsic_Prothrombin_Activation_Pathway	cAMP-mediated_signaling	0.345894953771887
Protein_Ubiquitination_Pathway	Leptin_Signaling_in_Obesity	0.345899556128293
Growth_Hormone_Signaling	Ethanol_Degradation_II	0.345900120216389
Tryptophan_Degradation_X_(Mammalian,_via_Tryptamine)	Salvage_Pathways_of_Pyrimidine_Deoxyribonucleotides	0.345904591586266
Cellular_Effects_of_Sildenafil_(Viagra)	Prolactin_Signaling	0.345904669857634
CXCR4_Signaling	Epithelial_Adherens_Junction_Signaling	0.345910520983309
Cellular_Effects_of_Sildenafil_(Viagra)	Antigen_Presentation_Pathway	0.34591182907871
Cellular_Effects_of_Sildenafil_(Viagra)	Glioma_Invasiveness_Signaling	0.34591182907871
Cellular_Effects_of_Sildenafil_(Viagra)	Relaxin_Signaling	0.345911915204678
Acute_Phase_Response_Signaling	Epithelial_Adherens_Junction_Signaling	0.345923627182832
Axonal_Guidance_Signaling	tRNA_Charging	0.345950311032672
Ephrin_Receptor_Signaling	Leptin_Signaling_in_Obesity	0.345954784405171
Growth_Hormone_Signaling	Eicosanoid_Signaling	0.345958558739064
Role_of_Macrophages,_Fibroblasts_and_Endothelial_Cells_in_Rheumatoid_Arthritis	Tryptophan_Degradation_X_(Mammalian,_via_Tryptamine)	0.345961341525858
Axonal_Guidance_Signaling	EIF2_Signaling	0.345967057355588
Growth_Hormone_Signaling	Regulation_of_the_Epithelial-Mesenchymal_Transition_Pathway	0.345970246443598
Growth_Hormone_Signaling	G_s_Signaling	0.345975812017186
Coagulation_System	Tryptophan_Degradation_X_(Mammalian,_via_Tryptamine)	0.345988108569296
Cellular_Effects_of_Sildenafil_(Viagra)	Role_of_Tissue_Factor_in_Cancer	0.345994160121093
Tryptophan_Degradation_X_(Mammalian,_via_Tryptamine)	Epithelial_Adherens_Junction_Signaling	0.34599576207508
CXCR4_Signaling	Colorectal_Cancer_Metastasis_Signaling	0.345996373913507
Putrescine_Degradation_III	Intrinsic_Prothrombin_Activation_Pathway	0.346004898952708
Tryptophan_Degradation_X_(Mammalian,_via_Tryptamine)	Nitric_Oxide_Signaling_in_the_Cardiovascular_System	0.346006281746867
Putrescine_Degradation_III	Bladder_Cancer_Signaling	0.346009287367377
Cellular_Effects_of_Sildenafil_(Viagra)	Induction_of_Apoptosis_by_HIV1	0.346016300481901
Assembly_of_RNA_Polymerase_II_Complex	Calcium_Signaling	0.346016300481901
TR/RXR_Activation	Salvage_Pathways_of_Pyrimidine_Deoxyribonucleotides	0.346016300481901
Cellular_Effects_of_Sildenafil_(Viagra)	VDR/RXR_Activation	0.346029956226477
Calcium_Signaling	Leptin_Signaling_in_Obesity	0.346046356687005
Cellular_Effects_of_Sildenafil_(Viagra)	Glioblastoma_Multiforme_Signaling	0.346065752331861
Ephrin_Receptor_Signaling	Cardiac__-adrenergic_Signaling	0.346086932563895
Acute_Phase_Response_Signaling	Colorectal_Cancer_Metastasis_Signaling	0.346091941931412
Fatty_Acid__-oxidation	Leptin_Signaling_in_Obesity	0.346092442868163
Colorectal_Cancer_Metastasis_Signaling	Tryptophan_Degradation_X_(Mammalian,_via_Tryptamine)	0.346093945678419
Bladder_Cancer_Signaling	cAMP-mediated_signaling	0.346096951298929
Acute_Phase_Response_Signaling	Coagulation_System	0.346103290140244
Cellular_Effects_of_Sildenafil_(Viagra)	Dopamine_Degradation	0.346112287268859
Cellular_Effects_of_Sildenafil_(Viagra)	Inhibition_of_Matrix_Metalloproteases	0.346123026100475
Protein_Ubiquitination_Pathway	Nitric_Oxide_Signaling_in_the_Cardiovascular_System	0.346123026100475
Acute_Phase_Response_Signaling	EIF2_Signaling	0.346137527175819
HIF1__Signaling	Putrescine_Degradation_III	0.346144503763705
Human_Embryonic_Stem_Cell_Pluripotency	Thrombin_Signaling	0.346153056215122
Bladder_Cancer_Signaling	Ethanol_Degradation_IV	0.346163074950157
Growth_Hormone_Signaling	Agranulocyte_Adhesion_and_Diapedesis	0.346165041519179
Growth_Hormone_Signaling	RAR_Activation	0.346165041519179
Growth_Hormone_Signaling	LPS/IL-1_Mediated_Inhibition_of_RXR_Function	0.346165041519179
Growth_Hormone_Signaling	Oncostatin_M_Signaling	0.346165041519179
Growth_Hormone_Signaling	Tryptophan_Degradation_to_2-amino-3-carboxymuconate_Semialdehyde	0.346165041519179
TR/RXR_Activation	Leptin_Signaling_in_Obesity	0.34617259274844
Putrescine_Degradation_III	Role_of_Osteoblasts,_Osteoclasts_and_Chondrocytes_in_Rheumatoid_Arthritis	0.346177602115957
Growth_Hormone_Signaling	Actin_Cytoskeleton_Signaling	0.346184521026737
Growth_Hormone_Signaling	Integrin_Signaling	0.346184521026737
Growth_Hormone_Signaling	CREB_Signaling_in_Neurons	0.346184521026737
Tryptophan_Degradation_X_(Mammalian,_via_Tryptamine)	EIF2_Signaling	0.346185116167233
tRNA_Charging	Human_Embryonic_Stem_Cell_Pluripotency	0.346190742814483
Fatty_Acid__-oxidation	Salvage_Pathways_of_Pyrimidine_Deoxyribonucleotides	0.346197138649274
CXCR4_Signaling	Role_of_Osteoblasts,_Osteoclasts_and_Chondrocytes_in_Rheumatoid_Arthritis	0.346197941662667
Intrinsic_Prothrombin_Activation_Pathway	Ethanol_Degradation_IV	0.346204334396989
Cellular_Effects_of_Sildenafil_(Viagra)	Cell_Cycle_Control_of_Chromosomal_Replication	0.346205357142857
Growth_Hormone_Signaling	Ovarian_Cancer_Signaling	0.346211792337318
Calcium_Signaling	Nitric_Oxide_Signaling_in_the_Cardiovascular_System	0.346212667688578
Epithelial_Adherens_Junction_Signaling	Calcium_Signaling	0.346219680803102
Growth_Hormone_Signaling	Role_of_JAK2_in_Hormone-like_Cytokine_Signaling	0.346223480041853
Acute_Phase_Response_Signaling	Nitric_Oxide_Signaling_in_the_Cardiovascular_System	0.346225191107371
Putrescine_Degradation_III	Assembly_of_RNA_Polymerase_II_Complex	0.346230200474888
HIF1__Signaling	cAMP-mediated_signaling	0.346233994027164
Role_of_Osteoblasts,_Osteoclasts_and_Chondrocytes_in_Rheumatoid_Arthritis	cAMP-mediated_signaling	0.346247733261198
Human_Embryonic_Stem_Cell_Pluripotency	Regulation_of_the_Epithelial-Mesenchymal_Transition_Pathway	0.346251239818461
Cellular_Effects_of_Sildenafil_(Viagra)	Histamine_Degradation	0.346255471690394
Cellular_Effects_of_Sildenafil_(Viagra)	Noradrenaline_and_Adrenaline_Degradation	0.346255471690394
Ephrin_Receptor_Signaling	Macropinocytosis_Signaling	0.346267269794516
Intrinsic_Prothrombin_Activation_Pathway	Tryptophan_Degradation_X_(Mammalian,_via_Tryptamine)	0.346276949353625
Axonal_Guidance_Signaling	Colorectal_Cancer_Metastasis_Signaling	0.346285642693503
P2Y_Purigenic_Receptor_Signaling_Pathway	Putrescine_Degradation_III	0.34630033162013
HIF1__Signaling	Ethanol_Degradation_IV	0.346301495254459
P2Y_Purigenic_Receptor_Signaling_Pathway	cAMP-mediated_signaling	0.346307344734654
Bladder_Cancer_Signaling	Salvage_Pathways_of_Pyrimidine_Deoxyribonucleotides	0.346307344734654
Cellular_Effects_of_Sildenafil_(Viagra)	Atherosclerosis_Signaling	0.34630916584847
Ephrin_Receptor_Signaling	Thrombopoietin_Signaling	0.346310851291916
TR/RXR_Activation	Nitric_Oxide_Signaling_in_the_Cardiovascular_System	0.346310851291916
CXCR4_Signaling	Regulation_of_the_Epithelial-Mesenchymal_Transition_Pathway	0.34631365648163
Intrinsic_Prothrombin_Activation_Pathway	Salvage_Pathways_of_Pyrimidine_Deoxyribonucleotides	0.346316325069547
Role_of_Macrophages,_Fibroblasts_and_Endothelial_Cells_in_Rheumatoid_Arthritis	Calcium_Signaling	0.346318094792849
Fatty_Acid__-oxidation	Epithelial_Adherens_Junction_Signaling	0.346323374710709
Role_of_Osteoblasts,_Osteoclasts_and_Chondrocytes_in_Rheumatoid_Arthritis	Ethanol_Degradation_IV	0.346331389698737
Axonal_Guidance_Signaling	Regulation_of_the_Epithelial-Mesenchymal_Transition_Pathway	0.346332177630502
Fatty_Acid__-oxidation	Nitric_Oxide_Signaling_in_the_Cardiovascular_System	0.346333894382495
Growth_Hormone_Signaling	Hepatic_Fibrosis_/_Hepatic_Stellate_Cell_Activation	0.34633646118569
Growth_Hormone_Signaling	Sperm_Motility	0.34633646118569
Growth_Hormone_Signaling	Role_of_Tissue_Factor_in_Cancer	0.34633646118569
Growth_Hormone_Signaling	ILK_Signaling	0.34633646118569
HIF1__Signaling	Fatty_Acid__-oxidation	0.346348541564392
Ephrin_Receptor_Signaling	Role_of_IL-17A_in_Psoriasis	0.346349423421799
Ephrin_Receptor_Signaling	tRNA_Splicing	0.346349423421799
CXCR4_Signaling	Thrombin_Signaling	0.346369647523063
Cellular_Effects_of_Sildenafil_(Viagra)	DNA_damage-induced_14-3-3__Signaling	0.346370019227622
Colorectal_Cancer_Metastasis_Signaling	Calcium_Signaling	0.346370462765371
P2Y_Purigenic_Receptor_Signaling_Pathway	Ethanol_Degradation_IV	0.346373468385882
Human_Embryonic_Stem_Cell_Pluripotency	Prolactin_Signaling	0.346373969322633
Axonal_Guidance_Signaling	Thrombin_Signaling	0.346385871788578
Acute_Phase_Response_Signaling	tRNA_Charging	0.346394443555698
Assembly_of_RNA_Polymerase_II_Complex	Ethanol_Degradation_IV	0.346401520843978
Salvage_Pathways_of_Pyrimidine_Deoxyribonucleotides	Calcium_Signaling	0.34640202178073
Coagulation_System	TR/RXR_Activation	0.34640350877193
Colorectal_Cancer_Metastasis_Signaling	Fatty_Acid__-oxidation	0.346404025527737
Intrinsic_Prothrombin_Activation_Pathway	Leptin_Signaling_in_Obesity	0.346411440435281
Cellular_Effects_of_Sildenafil_(Viagra)	G_s_Signaling	0.346414508672885
Acute_Phase_Response_Signaling	Thrombin_Signaling	0.346418051756785
Growth_Hormone_Signaling	Induction_of_Apoptosis_by_HIV1	0.346422171018945
Growth_Hormone_Signaling	IL-8_Signaling	0.34643385872348
Growth_Hormone_Signaling	Cardiac_Hypertrophy_Signaling	0.34643385872348
Growth_Hormone_Signaling	CDK5_Signaling	0.34643385872348
Cellular_Effects_of_Sildenafil_(Viagra)	TWEAK_Signaling	0.346445191048928
Bladder_Cancer_Signaling	Leptin_Signaling_in_Obesity	0.346446104214882
tRNA_Charging	Tryptophan_Degradation_X_(Mammalian,_via_Tryptamine)	0.346452567589186
Role_of_Macrophages,_Fibroblasts_and_Endothelial_Cells_in_Rheumatoid_Arthritis	Fatty_Acid__-oxidation	0.346460573476703
HIF1__Signaling	Salvage_Pathways_of_Pyrimidine_Deoxyribonucleotides	0.346466668712158
Tryptophan_Degradation_X_(Mammalian,_via_Tryptamine)	Thrombin_Signaling	0.346472653862723
Role_of_Macrophages,_Fibroblasts_and_Endothelial_Cells_in_Rheumatoid_Arthritis	TR/RXR_Activation	0.346473930853314
Growth_Hormone_Signaling	Role_of_Macrophages,_Fibroblasts_and_Endothelial_Cells_in_Rheumatoid_Arthritis	0.346476153157188
Cellular_Effects_of_Sildenafil_(Viagra)	Thrombopoietin_Signaling	0.346477407543773
Fatty_Acid__-oxidation	EIF2_Signaling	0.346477663230241
EIF2_Signaling	Calcium_Signaling	0.346479166040496
P2Y_Purigenic_Receptor_Signaling_Pathway	Salvage_Pathways_of_Pyrimidine_Deoxyribonucleotides	0.346482672597758
Human_Embryonic_Stem_Cell_Pluripotency	Dopamine_Degradation	0.346482672597758
Human_Embryonic_Stem_Cell_Pluripotency	Antigen_Presentation_Pathway	0.346482672597758
Human_Embryonic_Stem_Cell_Pluripotency	Glioma_Invasiveness_Signaling	0.346482672597758
Cellular_Effects_of_Sildenafil_(Viagra)	Glycine_Betaine_Degradation	0.346488146375389
Ephrin_Receptor_Signaling	Thyroid_Cancer_Signaling	0.346488182902027
Coagulation_System	Fatty_Acid__-oxidation	0.346491494694182
Protein_Ubiquitination_Pathway	Epithelial_Adherens_Junction_Signaling	0.346498885207004
Cellular_Effects_of_Sildenafil_(Viagra)	Endothelin-1_Signaling	0.346502464817542
Cellular_Effects_of_Sildenafil_(Viagra)	Gap_Junction_Signaling	0.346502464817542
Cellular_Effects_of_Sildenafil_(Viagra)	Synaptic_Long_Term_Depression	0.346502464817542
Cellular_Effects_of_Sildenafil_(Viagra)	Dendritic_Cell_Maturation	0.346502464817542
Cellular_Effects_of_Sildenafil_(Viagra)	Leukocyte_Extravasation_Signaling	0.346502464817542
Human_Embryonic_Stem_Cell_Pluripotency	Cell_Cycle_Control_of_Chromosomal_Replication	0.346510725055854
Cellular_Effects_of_Sildenafil_(Viagra)	Wnt/_-catenin_Signaling	0.346513203649157
CXCR4_Signaling	Antigen_Presentation_Pathway	0.346518956966885
CXCR4_Signaling	Glioma_Invasiveness_Signaling	0.346518956966885
Axonal_Guidance_Signaling	Glycine_Betaine_Degradation	0.346521896989036
Assembly_of_RNA_Polymerase_II_Complex	Salvage_Pathways_of_Pyrimidine_Deoxyribonucleotides	0.346528257842165
Human_Embryonic_Stem_Cell_Pluripotency	Glycine_Betaine_Degradation	0.346528257842165
Cellular_Effects_of_Sildenafil_(Viagra)	Agranulocyte_Adhesion_and_Diapedesis	0.346531101701849
Cellular_Effects_of_Sildenafil_(Viagra)	RAR_Activation	0.346531101701849
Cellular_Effects_of_Sildenafil_(Viagra)	LPS/IL-1_Mediated_Inhibition_of_RXR_Function	0.346531101701849
Cellular_Effects_of_Sildenafil_(Viagra)	Oncostatin_M_Signaling	0.346531101701849
Cellular_Effects_of_Sildenafil_(Viagra)	Tryptophan_Degradation_to_2-amino-3-carboxymuconate_Semialdehyde	0.346531101701849
Tryptophan_Degradation_X_(Mammalian,_via_Tryptamine)	Regulation_of_the_Epithelial-Mesenchymal_Transition_Pathway	0.346535771893441
Axonal_Guidance_Signaling	Cell_Cycle_Control_of_Chromosomal_Replication	0.34653621543119
HIF1__Signaling	Leptin_Signaling_in_Obesity	0.34653877229586
CXCR4_Signaling	Cell_Cycle_Control_of_Chromosomal_Replication	0.346545086119554
Axonal_Guidance_Signaling	Dopamine_Degradation	0.346550533873343
TR/RXR_Activation	EIF2_Signaling	0.346552803742999
Growth_Hormone_Signaling	G_Beta_Gamma_Signaling	0.346556301342416
Colorectal_Cancer_Metastasis_Signaling	TR/RXR_Activation	0.346556310300261
Glioblastoma_Multiforme_Signaling	Human_Embryonic_Stem_Cell_Pluripotency	0.346559816857524
Human_Embryonic_Stem_Cell_Pluripotency	VDR/RXR_Activation	0.346559816857524
Cellular_Effects_of_Sildenafil_(Viagra)	Ovarian_Cancer_Signaling	0.346563318196694
Protein_Ubiquitination_Pathway	EIF2_Signaling	0.346563318196694
Human_Embryonic_Stem_Cell_Pluripotency	Role_of_Tissue_Factor_in_Cancer	0.346563323414786
Axonal_Guidance_Signaling	Antigen_Presentation_Pathway	0.346564852315497
Axonal_Guidance_Signaling	Glioma_Invasiveness_Signaling	0.346564852315497
tRNA_Charging	Protein_Ubiquitination_Pathway	0.346571831661056
Protein_Ubiquitination_Pathway	Colorectal_Cancer_Metastasis_Signaling	0.346581216249386
Role_of_Osteoblasts,_Osteoclasts_and_Chondrocytes_in_Rheumatoid_Arthritis	Leptin_Signaling_in_Obesity	0.346582859948103
Cellular_Effects_of_Sildenafil_(Viagra)	Ethanol_Degradation_II	0.346591955081001
Axonal_Guidance_Signaling	G_Beta_Gamma_Signaling	0.346603398354924
CXCR4_Signaling	Role_of_Tissue_Factor_in_Cancer	0.346604809897083
Protein_Ubiquitination_Pathway	Regulation_of_the_Epithelial-Mesenchymal_Transition_Pathway	0.346606273523155
Intrinsic_Prothrombin_Activation_Pathway	Epithelial_Adherens_Junction_Signaling	0.346606273523155
CXCR4_Signaling	Dopamine_Degradation	0.346608542633179
Bladder_Cancer_Signaling	Epithelial_Adherens_Junction_Signaling	0.346608908659193
CXCR4_Signaling	Prolactin_Signaling	0.346612275369274
Human_Embryonic_Stem_Cell_Pluripotency	Inhibition_of_Matrix_Metalloproteases	0.346615921773717
Human_Embryonic_Stem_Cell_Pluripotency	Histamine_Degradation	0.346622934888241
Human_Embryonic_Stem_Cell_Pluripotency	Noradrenaline_and_Adrenaline_Degradation	0.346622934888241
Role_of_Macrophages,_Fibroblasts_and_Endothelial_Cells_in_Rheumatoid_Arthritis	Intrinsic_Prothrombin_Activation_Pathway	0.346623950583578
Growth_Hormone_Signaling	GDNF_Family_Ligand-Receptor_Interactions	0.346632549700572
Acute_Phase_Response_Signaling	Glycine_Betaine_Degradation	0.346638964864296
CXCR4_Signaling	VDR/RXR_Activation	0.346642137258039
Cellular_Effects_of_Sildenafil_(Viagra)	Retinoate_Biosynthesis_I	0.346643470378073
Cellular_Effects_of_Sildenafil_(Viagra)	Eicosanoid_Signaling	0.346645649239077
Acute_Phase_Response_Signaling	Antigen_Presentation_Pathway	0.34664597797882
Acute_Phase_Response_Signaling	Glioma_Invasiveness_Signaling	0.34664597797882
Assembly_of_RNA_Polymerase_II_Complex	Leptin_Signaling_in_Obesity	0.346649484536082
Acute_Phase_Response_Signaling	Cell_Cycle_Control_of_Chromosomal_Replication	0.346652991093345
Bladder_Cancer_Signaling	Nitric_Oxide_Signaling_in_the_Cardiovascular_System	0.3466544939036
CXCR4_Signaling	Actin_Cytoskeleton_Signaling	0.346657268170426
CXCR4_Signaling	Integrin_Signaling	0.346657268170426
CXCR4_Signaling	CREB_Signaling_in_Neurons	0.346657268170426
Ephrin_Receptor_Signaling	Caveolar-mediated_Endocytosis_Signaling	0.346677536994179
Ephrin_Receptor_Signaling	Regulation_of_eIF4_and_p70S6K_Signaling	0.346677536994179
Growth_Hormone_Signaling	RhoGDI_Signaling	0.346690988223246
Acute_Phase_Response_Signaling	Prolactin_Signaling	0.346691563223227
Tryptophan_Degradation_X_(Mammalian,_via_Tryptamine)	Prolactin_Signaling	0.346693566970234
Axonal_Guidance_Signaling	Histamine_Degradation	0.346693718294878
Axonal_Guidance_Signaling	Noradrenaline_and_Adrenaline_Degradation	0.346693718294878
Role_of_Osteoblasts,_Osteoclasts_and_Chondrocytes_in_Rheumatoid_Arthritis	Salvage_Pathways_of_Pyrimidine_Deoxyribonucleotides	0.346696572590745
Axonal_Guidance_Signaling	VDR/RXR_Activation	0.346700877515955
Axonal_Guidance_Signaling	Role_of_Tissue_Factor_in_Cancer	0.346704457126493
Human_Embryonic_Stem_Cell_Pluripotency	Basal_Cell_Carcinoma_Signaling	0.346707092262531
Acute_Phase_Response_Signaling	Regulation_of_the_Epithelial-Mesenchymal_Transition_Pathway	0.346709096009538
Thrombin_Signaling	Calcium_Signaling	0.346714105377055
Intrinsic_Prothrombin_Activation_Pathway	Nitric_Oxide_Signaling_in_the_Cardiovascular_System	0.346717241449845
Coagulation_System	Bladder_Cancer_Signaling	0.346720791340052
Acute_Phase_Response_Signaling	Dopamine_Degradation	0.346723122238586
Colorectal_Cancer_Metastasis_Signaling	Intrinsic_Prothrombin_Activation_Pathway	0.346724400670921
Colorectal_Cancer_Metastasis_Signaling	Bladder_Cancer_Signaling	0.346724625048841
Acute_Phase_Response_Signaling	Role_of_Tissue_Factor_in_Cancer	0.346726628795848
Glycine_Betaine_Degradation	Tryptophan_Degradation_X_(Mammalian,_via_Tryptamine)	0.346728632542855
Tryptophan_Degradation_X_(Mammalian,_via_Tryptamine)	Antigen_Presentation_Pathway	0.346728632542855
Tryptophan_Degradation_X_(Mammalian,_via_Tryptamine)	Glioma_Invasiveness_Signaling	0.346728632542855
Relaxin_Signaling	Human_Embryonic_Stem_Cell_Pluripotency	0.346731559891998
Axonal_Guidance_Signaling	Basal_Cell_Carcinoma_Signaling	0.346736673621339
Protein_Ubiquitination_Pathway	Prolactin_Signaling	0.346742298723613
Tryptophan_Degradation_X_(Mammalian,_via_Tryptamine)	Cell_Cycle_Control_of_Chromosomal_Replication	0.346742658771903
Regulation_of_the_Epithelial-Mesenchymal_Transition_Pathway	Calcium_Signaling	0.346749170949676
Cellular_Effects_of_Sildenafil_(Viagra)	Actin_Cytoskeleton_Signaling	0.34674945794469
Cellular_Effects_of_Sildenafil_(Viagra)	Integrin_Signaling	0.34674945794469
Cellular_Effects_of_Sildenafil_(Viagra)	CREB_Signaling_in_Neurons	0.34674945794469
Putrescine_Degradation_III	cAMP-mediated_signaling	0.346752677506938
CXCR4_Signaling	Glycine_Betaine_Degradation	0.346754119340905
CXCR4_Signaling	Basal_Cell_Carcinoma_Signaling	0.346754119340905
Ephrin_Receptor_Signaling	Estrogen_Receptor_Signaling	0.346755083046964
HIF1__Signaling	Epithelial_Adherens_Junction_Signaling	0.346756617165767
NAD_biosynthesis_II_(from_tryptophan)	Mismatch_Repair_in_Eukaryotes	0.346757518796992
CXCR4_Signaling	Histamine_Degradation	0.346757852077001
CXCR4_Signaling	Noradrenaline_and_Adrenaline_Degradation	0.346757852077001
Protein_Ubiquitination_Pathway	Glycine_Betaine_Degradation	0.346760196776305
Acute_Phase_Response_Signaling	VDR/RXR_Activation	0.346761694368469
tRNA_Charging	Fatty_Acid__-oxidation	0.346763984429158
CXCR4_Signaling	Inhibition_of_Matrix_Metalloproteases	0.346769050285288
Protein_Ubiquitination_Pathway	Cell_Cycle_Control_of_Chromosomal_Replication	0.346774515218458
Role_of_Osteoblasts,_Osteoclasts_and_Chondrocytes_in_Rheumatoid_Arthritis	Epithelial_Adherens_Junction_Signaling	0.346777223407773
Atherosclerosis_Signaling	Human_Embryonic_Stem_Cell_Pluripotency	0.346780729965035
Axonal_Guidance_Signaling	Coagulation_System	0.346781547210511
Fatty_Acid__-oxidation	Thrombin_Signaling	0.346782733712041
Role_of_Osteoblasts,_Osteoclasts_and_Chondrocytes_in_Rheumatoid_Arthritis	Nitric_Oxide_Signaling_in_the_Cardiovascular_System	0.346787743079559
TR/RXR_Activation	Epithelial_Adherens_Junction_Signaling	0.346787743079559
Role_of_Macrophages,_Fibroblasts_and_Endothelial_Cells_in_Rheumatoid_Arthritis	Assembly_of_RNA_Polymerase_II_Complex	0.346793394777266
Role_of_Macrophages,_Fibroblasts_and_Endothelial_Cells_in_Rheumatoid_Arthritis	Bladder_Cancer_Signaling	0.346797290678777
Growth_Hormone_Signaling	Role_of_CHK_Proteins_in_Cell_Cycle_Checkpoint_Control	0.346797847236136
Bladder_Cancer_Signaling	EIF2_Signaling	0.346798262751345
Intrinsic_Prothrombin_Activation_Pathway	EIF2_Signaling	0.346799572492227
Tryptophan_Degradation_X_(Mammalian,_via_Tryptamine)	Role_of_Tissue_Factor_in_Cancer	0.346809283359883
Fatty_Acid__-oxidation	Regulation_of_the_Epithelial-Mesenchymal_Transition_Pathway	0.346817799284662
HIF1__Signaling	Nitric_Oxide_Signaling_in_the_Cardiovascular_System	0.346821050155457
Protein_Ubiquitination_Pathway	Antigen_Presentation_Pathway	0.346821050155457
Protein_Ubiquitination_Pathway	Glioma_Invasiveness_Signaling	0.346821050155457
Assembly_of_RNA_Polymerase_II_Complex	Nitric_Oxide_Signaling_in_the_Cardiovascular_System	0.34682280865218
P2Y_Purigenic_Receptor_Signaling_Pathway	Nitric_Oxide_Signaling_in_the_Cardiovascular_System	0.346829821766704
HIF1__Signaling	Bladder_Cancer_Signaling	0.346831401420217
Coagulation_System	Role_of_Osteoblasts,_Osteoclasts_and_Chondrocytes_in_Rheumatoid_Arthritis	0.346832773422919
Protein_Ubiquitination_Pathway	RhoGDI_Signaling	0.346836834881228
Axonal_Guidance_Signaling	Inhibition_of_Matrix_Metalloproteases	0.346840482326951
Tryptophan_Degradation_X_(Mammalian,_via_Tryptamine)	VDR/RXR_Activation	0.346844348932504
Cellular_Effects_of_Sildenafil_(Viagra)	Hepatic_Fibrosis_/_Hepatic_Stellate_Cell_Activation	0.346849687039764
Cellular_Effects_of_Sildenafil_(Viagra)	Sperm_Motility	0.346849687039764
Cellular_Effects_of_Sildenafil_(Viagra)	ILK_Signaling	0.346849687039764
Role_of_Macrophages,_Fibroblasts_and_Endothelial_Cells_in_Rheumatoid_Arthritis	Acute_Phase_Response_Signaling	0.346850163627863
Role_of_Macrophages,_Fibroblasts_and_Endothelial_Cells_in_Rheumatoid_Arthritis	CXCR4_Signaling	0.346856310564176
Role_of_Osteoblasts,_Osteoclasts_and_Chondrocytes_in_Rheumatoid_Arthritis	Colorectal_Cancer_Metastasis_Signaling	0.3468578742248
Tryptophan_Degradation_X_(Mammalian,_via_Tryptamine)	Dopamine_Degradation	0.346858375161552
Acute_Phase_Response_Signaling	Histamine_Degradation	0.346863384529069
Acute_Phase_Response_Signaling	Noradrenaline_and_Adrenaline_Degradation	0.346863384529069
Growth_Hormone_Signaling	Extrinsic_Prothrombin_Activation_Pathway	0.346864077561834
TR/RXR_Activation	Regulation_of_the_Epithelial-Mesenchymal_Transition_Pathway	0.346864887339325
Growth_Hormone_Signaling	Cardiac__-adrenergic_Signaling	0.346866303791269
Acute_Phase_Response_Signaling	Basal_Cell_Carcinoma_Signaling	0.346866891086331
P2Y_Purigenic_Receptor_Signaling_Pathway	Epithelial_Adherens_Junction_Signaling	0.346871900453849
Human_Embryonic_Stem_Cell_Pluripotency	DNA_damage-induced_14-3-3__Signaling	0.346871900453849
Human_Embryonic_Stem_Cell_Pluripotency	Wnt/_-catenin_Signaling	0.346871900453849
Cellular_Effects_of_Sildenafil_(Viagra)	G_Beta_Gamma_Signaling	0.346872698821797
HIF1__Signaling	Colorectal_Cancer_Metastasis_Signaling	0.346874744313533
Acute_Phase_Response_Signaling	Glioblastoma_Multiforme_Signaling	0.346877410758118
Acute_Phase_Response_Signaling	Inhibition_of_Matrix_Metalloproteases	0.34688091731538
CXCR4_Signaling	Glioblastoma_Multiforme_Signaling	0.346881032368154
HIF1__Signaling	Role_of_Macrophages,_Fibroblasts_and_Endothelial_Cells_in_Rheumatoid_Arthritis	0.346890144017473
Human_Embryonic_Stem_Cell_Pluripotency	G_s_Signaling	0.346890936050414
Assembly_of_RNA_Polymerase_II_Complex	Epithelial_Adherens_Junction_Signaling	0.346903459469207
Protein_Ubiquitination_Pathway	Dopamine_Degradation	0.346906960808378
Axonal_Guidance_Signaling	Prolactin_Signaling	0.346912074537719
CXCR4_Signaling	Relaxin_Signaling	0.346913096055169
Role_of_Macrophages,_Fibroblasts_and_Endothelial_Cells_in_Rheumatoid_Arthritis	P2Y_Purigenic_Receptor_Signaling_Pathway	0.346914167724126
Cellular_Effects_of_Sildenafil_(Viagra)	GDNF_Family_Ligand-Receptor_Interactions	0.346921279250532
Protein_Ubiquitination_Pathway	VDR/RXR_Activation	0.346921279250532
Cellular_Effects_of_Sildenafil_(Viagra)	Role_of_JAK2_in_Hormone-like_Cytokine_Signaling	0.34692485886107
Axonal_Guidance_Signaling	DNA_damage-induced_14-3-3__Signaling	0.346929972590411
Role_of_Osteoblasts,_Osteoclasts_and_Chondrocytes_in_Rheumatoid_Arthritis	EIF2_Signaling	0.346931511927304
Glioblastoma_Multiforme_Signaling	Protein_Ubiquitination_Pathway	0.346932018082147
CXCR4_Signaling	Atherosclerosis_Signaling	0.346933290673492
Ethanol_Degradation_IV	cAMP-mediated_signaling	0.346934517547814
Cellular_Effects_of_Sildenafil_(Viagra)	Factors_Promoting_Cardiogenesis_in_Vertebrates	0.346934784878864
Human_Embryonic_Stem_Cell_Pluripotency	Thrombopoietin_Signaling	0.346935018484566
Calcium_Signaling	Prolactin_Signaling	0.346935018484566
Tryptophan_Degradation_X_(Mammalian,_via_Tryptamine)	Basal_Cell_Carcinoma_Signaling	0.34693902597858
Calcium_Signaling	Antigen_Presentation_Pathway	0.34694203159909
Calcium_Signaling	Glioma_Invasiveness_Signaling	0.34694203159909
Assembly_of_RNA_Polymerase_II_Complex	Colorectal_Cancer_Metastasis_Signaling	0.346945538156352
Human_Embryonic_Stem_Cell_Pluripotency	TWEAK_Signaling	0.346945538156352
Glioblastoma_Multiforme_Signaling	Tryptophan_Degradation_X_(Mammalian,_via_Tryptamine)	0.346949545650366
HIF1__Signaling	EIF2_Signaling	0.346949916134839
Protein_Ubiquitination_Pathway	Role_of_Tissue_Factor_in_Cancer	0.346949916134839
Human_Embryonic_Stem_Cell_Pluripotency	Ethanol_Degradation_II	0.346952551270877
Glycine_Betaine_Degradation	Calcium_Signaling	0.346952551270877
Coagulation_System	Assembly_of_RNA_Polymerase_II_Complex	0.346955953714072
Cellular_Effects_of_Sildenafil_(Viagra)	RhoGDI_Signaling	0.346957075355916
Axonal_Guidance_Signaling	Atherosclerosis_Signaling	0.346969348306333
P2Y_Purigenic_Receptor_Signaling_Pathway	Colorectal_Cancer_Metastasis_Signaling	0.346970084057187
Coagulation_System	Protein_Ubiquitination_Pathway	0.346970563562877
tRNA_Charging	Intrinsic_Prothrombin_Activation_Pathway	0.346972742425728
Protein_Ubiquitination_Pathway	Basal_Cell_Carcinoma_Signaling	0.346974973408607
Human_Embryonic_Stem_Cell_Pluripotency	Agranulocyte_Adhesion_and_Diapedesis	0.346977097171711
Human_Embryonic_Stem_Cell_Pluripotency	RAR_Activation	0.346977097171711
Human_Embryonic_Stem_Cell_Pluripotency	LPS/IL-1_Mediated_Inhibition_of_RXR_Function	0.346977097171711
Human_Embryonic_Stem_Cell_Pluripotency	Oncostatin_M_Signaling	0.346977097171711
Human_Embryonic_Stem_Cell_Pluripotency	Tryptophan_Degradation_to_2-amino-3-carboxymuconate_Semialdehyde	0.346977097171711
Salvage_Pathways_of_Pyrimidine_Deoxyribonucleotides	cAMP-mediated_signaling	0.346980603728973
Growth_Hormone_Signaling	Glycogen_Degradation_II	0.346980954607182
Axonal_Guidance_Signaling	Relaxin_Signaling	0.346982299498747
Axonal_Guidance_Signaling	Wnt/_-catenin_Signaling	0.346983666748486
CXCR4_Signaling	DNA_damage-induced_14-3-3__Signaling	0.34698554897883
Calcium_Signaling	Dopamine_Degradation	0.346991123400759
Bladder_Cancer_Signaling	VDR/RXR_Activation	0.346998136515284
Tryptophan_Degradation_X_(Mammalian,_via_Tryptamine)	Histamine_Degradation	0.346998637452035
Tryptophan_Degradation_X_(Mammalian,_via_Tryptamine)	Noradrenaline_and_Adrenaline_Degradation	0.346998637452035
Growth_Hormone_Signaling	Antigen_Presentation_Pathway	0.34700043411474
Growth_Hormone_Signaling	Glioma_Invasiveness_Signaling	0.34700043411474
Growth_Hormone_Signaling	Role_of_IL-17A_in_Psoriasis	0.34700043411474
Growth_Hormone_Signaling	tRNA_Splicing	0.34700043411474
Acute_Phase_Response_Signaling	Relaxin_Signaling	0.347002076174112
Putrescine_Degradation_III	Salvage_Pathways_of_Pyrimidine_Deoxyribonucleotides	0.347005149629808
Human_Embryonic_Stem_Cell_Pluripotency	Eicosanoid_Signaling	0.347005149629808
TR/RXR_Activation	Antigen_Presentation_Pathway	0.347005149629808
TR/RXR_Activation	Glioma_Invasiveness_Signaling	0.347005149629808
P2Y_Purigenic_Receptor_Signaling_Pathway	EIF2_Signaling	0.34700865618707
Fatty_Acid__-oxidation	Antigen_Presentation_Pathway	0.347010659934077
Fatty_Acid__-oxidation	Glioma_Invasiveness_Signaling	0.347010659934077
Axonal_Guidance_Signaling	Ethanol_Degradation_II	0.347012303632793
TR/RXR_Activation	Prolactin_Signaling	0.347015669301594
P2Y_Purigenic_Receptor_Signaling_Pathway	Leptin_Signaling_in_Obesity	0.347017673048601
Fatty_Acid__-oxidation	Glycine_Betaine_Degradation	0.347021179605863
Assembly_of_RNA_Polymerase_II_Complex	cAMP-mediated_signaling	0.347033202087904
Tryptophan_Degradation_X_(Mammalian,_via_Tryptamine)	Inhibition_of_Matrix_Metalloproteases	0.347033703024656
Axonal_Guidance_Signaling	TWEAK_Signaling	0.347033781296024
Fatty_Acid__-oxidation	Cell_Cycle_Control_of_Chromosomal_Replication	0.347035205834911
Human_Embryonic_Stem_Cell_Pluripotency	Ovarian_Cancer_Signaling	0.347047228316953
Protein_Ubiquitination_Pathway	Histamine_Degradation	0.347050145229913
Protein_Ubiquitination_Pathway	Noradrenaline_and_Adrenaline_Degradation	0.347050145229913
Coagulation_System	P2Y_Purigenic_Receptor_Signaling_Pathway	0.347056737588652
Calcium_Signaling	VDR/RXR_Activation	0.347057747988739
CXCR4_Signaling	Wnt/_-catenin_Signaling	0.347060203700741
Axonal_Guidance_Signaling	Eicosanoid_Signaling	0.347065997790869
Human_Embryonic_Stem_Cell_Pluripotency	Endothelin-1_Signaling	0.347071774217787
Human_Embryonic_Stem_Cell_Pluripotency	Gap_Junction_Signaling	0.347071774217787
Human_Embryonic_Stem_Cell_Pluripotency	Synaptic_Long_Term_Depression	0.347071774217787
Human_Embryonic_Stem_Cell_Pluripotency	Dendritic_Cell_Maturation	0.347071774217787
Human_Embryonic_Stem_Cell_Pluripotency	Leukocyte_Extravasation_Signaling	0.347071774217787
Relaxin_Signaling	Tryptophan_Degradation_X_(Mammalian,_via_Tryptamine)	0.347075713876616
Acute_Phase_Response_Signaling	DNA_damage-induced_14-3-3__Signaling	0.34708429763658
TR/RXR_Activation	Glycine_Betaine_Degradation	0.347085800446836
TR/RXR_Activation	Role_of_Tissue_Factor_in_Cancer	0.347085800446836
TR/RXR_Activation	Dopamine_Degradation	0.347089307004098
Fatty_Acid__-oxidation	Role_of_Tissue_Factor_in_Cancer	0.347091310751105
Ephrin_Receptor_Signaling	Retinoate_Biosynthesis_I	0.347097170008354
Fatty_Acid__-oxidation	Prolactin_Signaling	0.347098323865629
TR/RXR_Activation	Cell_Cycle_Control_of_Chromosomal_Replication	0.347099826675884
CXCR4_Signaling	Ethanol_Degradation_II	0.347102863541833
Bladder_Cancer_Signaling	Thrombin_Signaling	0.347103333233146
Protein_Ubiquitination_Pathway	Inhibition_of_Matrix_Metalloproteases	0.347107418998527
Intrinsic_Prothrombin_Activation_Pathway	Thrombin_Signaling	0.347110998609066
Axonal_Guidance_Signaling	Agranulocyte_Adhesion_and_Diapedesis	0.347119691948945
Axonal_Guidance_Signaling	RAR_Activation	0.347119691948945
Axonal_Guidance_Signaling	LPS/IL-1_Mediated_Inhibition_of_RXR_Function	0.347119691948945
Axonal_Guidance_Signaling	Oncostatin_M_Signaling	0.347119691948945
Axonal_Guidance_Signaling	Tryptophan_Degradation_to_2-amino-3-carboxymuconate_Semialdehyde	0.347119691948945
Axonal_Guidance_Signaling	Retinoate_Biosynthesis_I	0.347122860342345
CXCR4_Signaling	Endothelin-1_Signaling	0.347123660214366
CXCR4_Signaling	Gap_Junction_Signaling	0.347123660214366
CXCR4_Signaling	Synaptic_Long_Term_Depression	0.347123660214366
CXCR4_Signaling	Dendritic_Cell_Maturation	0.347123660214366
CXCR4_Signaling	Leukocyte_Extravasation_Signaling	0.347123660214366
tRNA_Charging	Role_of_Osteoblasts,_Osteoclasts_and_Chondrocytes_in_Rheumatoid_Arthritis	0.347123926838373
Fatty_Acid__-oxidation	VDR/RXR_Activation	0.347126376323725
Putrescine_Degradation_III	Leptin_Signaling_in_Obesity	0.347129882880987
Retinoate_Biosynthesis_I	Human_Embryonic_Stem_Cell_Pluripotency	0.347130064745196
Glioblastoma_Multiforme_Signaling	Calcium_Signaling	0.347131385691243
Calcium_Signaling	Histamine_Degradation	0.347131385691243
Calcium_Signaling	Noradrenaline_and_Adrenaline_Degradation	0.347131385691243
Cellular_Effects_of_Sildenafil_(Viagra)	Extrinsic_Prothrombin_Activation_Pathway	0.347134010391098
Fatty_Acid__-oxidation	Dopamine_Degradation	0.347140402552774
Atherosclerosis_Signaling	Tryptophan_Degradation_X_(Mammalian,_via_Tryptamine)	0.347145912857043
Atherosclerosis_Signaling	Protein_Ubiquitination_Pathway	0.347146794714449
Acute_Phase_Response_Signaling	Wnt/_-catenin_Signaling	0.347147415667298
cAMP-mediated_signaling	Leptin_Signaling_in_Obesity	0.347154428781822
TR/RXR_Activation	Thrombin_Signaling	0.347155931592077
Acute_Phase_Response_Signaling	TWEAK_Signaling	0.347157935339084
CXCR4_Signaling	Eicosanoid_Signaling	0.347158854583267
Calcium_Signaling	Role_of_Tissue_Factor_in_Cancer	0.347159438149339
HIF1__Signaling	tRNA_Charging	0.347172653092351
Acute_Phase_Response_Signaling	G_s_Signaling	0.347173464378388
Bladder_Cancer_Signaling	Regulation_of_the_Epithelial-Mesenchymal_Transition_Pathway	0.347173464378388
TR/RXR_Activation	VDR/RXR_Activation	0.347173464378388
CXCR4_Signaling	G_s_Signaling	0.347177518263744
Acute_Phase_Response_Signaling	Ethanol_Degradation_II	0.347182481239919
Human_Embryonic_Stem_Cell_Pluripotency	Actin_Cytoskeleton_Signaling	0.347183984050174
Human_Embryonic_Stem_Cell_Pluripotency	Integrin_Signaling	0.347183984050174
Human_Embryonic_Stem_Cell_Pluripotency	CREB_Signaling_in_Neurons	0.347183984050174
Axonal_Guidance_Signaling	Glioblastoma_Multiforme_Signaling	0.347191284159712
Axonal_Guidance_Signaling	Ovarian_Cancer_Signaling	0.347191284159712
Tryptophan_Degradation_X_(Mammalian,_via_Tryptamine)	G_s_Signaling	0.347193000911705
Acute_Phase_Response_Signaling	Thrombopoietin_Signaling	0.347200014026229
Glioblastoma_Multiforme_Signaling	TR/RXR_Activation	0.347201516836484
Axonal_Guidance_Signaling	Endothelin-1_Signaling	0.347202022991327
Axonal_Guidance_Signaling	Gap_Junction_Signaling	0.347202022991327
Axonal_Guidance_Signaling	Synaptic_Long_Term_Depression	0.347202022991327
Axonal_Guidance_Signaling	Dendritic_Cell_Maturation	0.347202022991327
Axonal_Guidance_Signaling	Leukocyte_Extravasation_Signaling	0.347202022991327
CXCR4_Signaling	Thrombopoietin_Signaling	0.347202047672372
Human_Embryonic_Stem_Cell_Pluripotency	Role_of_JAK2_in_Hormone-like_Cytokine_Signaling	0.347205023393746
Acute_Phase_Response_Signaling	Endothelin-1_Signaling	0.347214040255277
Acute_Phase_Response_Signaling	Gap_Junction_Signaling	0.347214040255277
Acute_Phase_Response_Signaling	Synaptic_Long_Term_Depression	0.347214040255277
Acute_Phase_Response_Signaling	Dendritic_Cell_Maturation	0.347214040255277
Acute_Phase_Response_Signaling	Leukocyte_Extravasation_Signaling	0.347214040255277
Protein_Ubiquitination_Pathway	DNA_damage-induced_14-3-3__Signaling	0.347218386925217
Protein_Ubiquitination_Pathway	Wnt/_-catenin_Signaling	0.347221966535755
TR/RXR_Activation	Histamine_Degradation	0.347229569294581
TR/RXR_Activation	Noradrenaline_and_Adrenaline_Degradation	0.347229569294581
Fatty_Acid__-oxidation	Basal_Cell_Carcinoma_Signaling	0.347231573041588
tRNA_Charging	Bladder_Cancer_Signaling	0.347232176185144
Acute_Phase_Response_Signaling	Eicosanoid_Signaling	0.34723507959885
Ephrin_Receptor_Signaling	Oxidative_Ethanol_Degradation_III	0.347235330067226
Protein_Ubiquitination_Pathway	Thrombin_Signaling	0.347236284977909
Role_of_Osteoblasts,_Osteoclasts_and_Chondrocytes_in_Rheumatoid_Arthritis	Thrombin_Signaling	0.347236582409105
Tryptophan_Degradation_X_(Mammalian,_via_Tryptamine)	Ethanol_Degradation_II	0.347237083345857
TR/RXR_Activation	Inhibition_of_Matrix_Metalloproteases	0.347240088966367
Cellular_Effects_of_Sildenafil_(Viagra)	Glycogen_Degradation_II	0.347241398707249
Fatty_Acid__-oxidation	Inhibition_of_Matrix_Metalloproteases	0.347245599270636
Intrinsic_Prothrombin_Activation_Pathway	Regulation_of_the_Epithelial-Mesenchymal_Transition_Pathway	0.347247023809524
Protein_Ubiquitination_Pathway	G_s_Signaling	0.347252137538864
Role_of_Osteoblasts,_Osteoclasts_and_Chondrocytes_in_Rheumatoid_Arthritis	Regulation_of_the_Epithelial-Mesenchymal_Transition_Pathway	0.347254115195415
Tryptophan_Degradation_X_(Mammalian,_via_Tryptamine)	Thrombopoietin_Signaling	0.347254616132167
Calcium_Signaling	Basal_Cell_Carcinoma_Signaling	0.347257621752677
Cellular_Effects_of_Sildenafil_(Viagra)	Basal_Cell_Carcinoma_Signaling	0.347257762641139
Cellular_Effects_of_Sildenafil_(Viagra)	IL-8_Signaling	0.347257762641139
Cellular_Effects_of_Sildenafil_(Viagra)	Cardiac_Hypertrophy_Signaling	0.347257762641139
Cellular_Effects_of_Sildenafil_(Viagra)	CDK5_Signaling	0.347257762641139
Cellular_Effects_of_Sildenafil_(Viagra)	Role_of_CHK_Proteins_in_Cell_Cycle_Checkpoint_Control	0.347259296759941
HIF1__Signaling	Thrombin_Signaling	0.347261342251677
Growth_Hormone_Signaling	VDR/RXR_Activation	0.347261459516018
Growth_Hormone_Signaling	Macropinocytosis_Signaling	0.347261459516018
Factors_Promoting_Cardiogenesis_in_Vertebrates	Human_Embryonic_Stem_Cell_Pluripotency	0.347262876370479
Glioblastoma_Multiforme_Signaling	Fatty_Acid__-oxidation	0.347263132056946
Putrescine_Degradation_III	Epithelial_Adherens_Junction_Signaling	0.347264634867202
tRNA_Charging	Assembly_of_RNA_Polymerase_II_Complex	0.347265770810004
Protein_Ubiquitination_Pathway	TWEAK_Signaling	0.347272081083292
Ephrin_Receptor_Signaling	Breast_Cancer_Regulation_by_Stathmin1	0.347272399386853
Putrescine_Degradation_III	Nitric_Oxide_Signaling_in_the_Cardiovascular_System	0.347275154538988
TR/RXR_Activation	Basal_Cell_Carcinoma_Signaling	0.34727866109625
Fatty_Acid__-oxidation	Histamine_Degradation	0.347280664843257
Fatty_Acid__-oxidation	Noradrenaline_and_Adrenaline_Degradation	0.347280664843257
Tryptophan_Degradation_X_(Mammalian,_via_Tryptamine)	Wnt/_-catenin_Signaling	0.347282668590264
Tryptophan_Degradation_X_(Mammalian,_via_Tryptamine)	Eicosanoid_Signaling	0.347289681704788
Tryptophan_Degradation_X_(Mammalian,_via_Tryptamine)	Endothelin-1_Signaling	0.347296694819312
Tryptophan_Degradation_X_(Mammalian,_via_Tryptamine)	Gap_Junction_Signaling	0.347296694819312
Tryptophan_Degradation_X_(Mammalian,_via_Tryptamine)	Synaptic_Long_Term_Depression	0.347296694819312
Tryptophan_Degradation_X_(Mammalian,_via_Tryptamine)	Dendritic_Cell_Maturation	0.347296694819312
Tryptophan_Degradation_X_(Mammalian,_via_Tryptamine)	Leukocyte_Extravasation_Signaling	0.347296694819312
Axonal_Guidance_Signaling	Thrombopoietin_Signaling	0.347298672475863
Inhibition_of_Matrix_Metalloproteases	Calcium_Signaling	0.347299700439822
Ethanol_Degradation_IV	Leptin_Signaling_in_Obesity	0.347301203250078
Acute_Phase_Response_Signaling	Agranulocyte_Adhesion_and_Diapedesis	0.347305210744091
Acute_Phase_Response_Signaling	RAR_Activation	0.347305210744091
Acute_Phase_Response_Signaling	LPS/IL-1_Mediated_Inhibition_of_RXR_Function	0.347305210744091
Acute_Phase_Response_Signaling	Oncostatin_M_Signaling	0.347305210744091
Acute_Phase_Response_Signaling	Tryptophan_Degradation_to_2-amino-3-carboxymuconate_Semialdehyde	0.347305210744091
Human_Embryonic_Stem_Cell_Pluripotency	Hepatic_Fibrosis_/_Hepatic_Stellate_Cell_Activation	0.347310220111609
Human_Embryonic_Stem_Cell_Pluripotency	Sperm_Motility	0.347310220111609
Human_Embryonic_Stem_Cell_Pluripotency	ILK_Signaling	0.347310220111609
Axonal_Guidance_Signaling	Factors_Promoting_Cardiogenesis_in_Vertebrates	0.347312813283208
Tryptophan_Degradation_X_(Mammalian,_via_Tryptamine)	Agranulocyte_Adhesion_and_Diapedesis	0.347314227605623
Tryptophan_Degradation_X_(Mammalian,_via_Tryptamine)	RAR_Activation	0.347314227605623
Tryptophan_Degradation_X_(Mammalian,_via_Tryptamine)	LPS/IL-1_Mediated_Inhibition_of_RXR_Function	0.347314227605623
Tryptophan_Degradation_X_(Mammalian,_via_Tryptamine)	Oncostatin_M_Signaling	0.347314227605623
Tryptophan_Degradation_X_(Mammalian,_via_Tryptamine)	Tryptophan_Degradation_to_2-amino-3-carboxymuconate_Semialdehyde	0.347314227605623
Protein_Ubiquitination_Pathway	Thrombopoietin_Signaling	0.347315036409753
Epithelial_Adherens_Junction_Signaling	cAMP-mediated_signaling	0.347317233226133
Axonal_Guidance_Signaling	Role_of_JAK2_in_Hormone-like_Cytokine_Signaling	0.347323729749632
Assembly_of_RNA_Polymerase_II_Complex	Thrombin_Signaling	0.347324246340657
Bladder_Cancer_Signaling	Glycine_Betaine_Degradation	0.347324246340657
Bladder_Cancer_Signaling	Prolactin_Signaling	0.347324246340657
Nitric_Oxide_Signaling_in_the_Cardiovascular_System	cAMP-mediated_signaling	0.347327752897919
Salvage_Pathways_of_Pyrimidine_Deoxyribonucleotides	Leptin_Signaling_in_Obesity	0.347329756644926
CXCR4_Signaling	Agranulocyte_Adhesion_and_Diapedesis	0.347332693435717
CXCR4_Signaling	RAR_Activation	0.347332693435717
CXCR4_Signaling	LPS/IL-1_Mediated_Inhibition_of_RXR_Function	0.347332693435717
CXCR4_Signaling	Oncostatin_M_Signaling	0.347332693435717
CXCR4_Signaling	Tryptophan_Degradation_to_2-amino-3-carboxymuconate_Semialdehyde	0.347332693435717
Intrinsic_Prothrombin_Activation_Pathway	Glycine_Betaine_Degradation	0.347332934462445
Retinoate_Biosynthesis_I	Protein_Ubiquitination_Pathway	0.347334026555751
Intrinsic_Prothrombin_Activation_Pathway	Prolactin_Signaling	0.347336514072983
Bladder_Cancer_Signaling	Cell_Cycle_Control_of_Chromosomal_Replication	0.347338272569705
Assembly_of_RNA_Polymerase_II_Complex	Regulation_of_the_Epithelial-Mesenchymal_Transition_Pathway	0.347341779126967
Putrescine_Degradation_III	Colorectal_Cancer_Metastasis_Signaling	0.347345285684229
P2Y_Purigenic_Receptor_Signaling_Pathway	Thrombin_Signaling	0.347348792241492
HIF1__Signaling	Regulation_of_the_Epithelial-Mesenchymal_Transition_Pathway	0.347350832515137
CXCR4_Signaling	TWEAK_Signaling	0.347351357116195
Protein_Ubiquitination_Pathway	Agranulocyte_Adhesion_and_Diapedesis	0.347357991736213
Protein_Ubiquitination_Pathway	RAR_Activation	0.347357991736213
Protein_Ubiquitination_Pathway	LPS/IL-1_Mediated_Inhibition_of_RXR_Function	0.347357991736213
Protein_Ubiquitination_Pathway	Oncostatin_M_Signaling	0.347357991736213
Protein_Ubiquitination_Pathway	Tryptophan_Degradation_to_2-amino-3-carboxymuconate_Semialdehyde	0.347357991736213
Relaxin_Signaling	Calcium_Signaling	0.347357991736213
Ethanol_Degradation_IV	Salvage_Pathways_of_Pyrimidine_Deoxyribonucleotides	0.34736582409105
Bladder_Cancer_Signaling	Antigen_Presentation_Pathway	0.347366325027802
Bladder_Cancer_Signaling	Glioma_Invasiveness_Signaling	0.347366325027802
Human_Embryonic_Stem_Cell_Pluripotency	G_Beta_Gamma_Signaling	0.347367827838057
Intrinsic_Prothrombin_Activation_Pathway	Cell_Cycle_Control_of_Chromosomal_Replication	0.347368730567828
Atherosclerosis_Signaling	Calcium_Signaling	0.347369831585064
Role_of_Osteoblasts,_Osteoclasts_and_Chondrocytes_in_Rheumatoid_Arthritis	Dopamine_Degradation	0.347373338142326
Relaxin_Signaling	Fatty_Acid__-oxidation	0.347374355670103
Acute_Phase_Response_Signaling	Ovarian_Cancer_Signaling	0.347375341889333
Calcium_Signaling	DNA_damage-induced_14-3-3__Signaling	0.34738035125685
Coagulation_System	Putrescine_Degradation_III	0.347381485628966
Cellular_Effects_of_Sildenafil_(Viagra)	Cardiac__-adrenergic_Signaling	0.34738662862052
Protein_Ubiquitination_Pathway	Ethanol_Degradation_II	0.347397367452136
Bladder_Cancer_Signaling	Dopamine_Degradation	0.347397884043161
Human_Embryonic_Stem_Cell_Pluripotency	GDNF_Family_Ligand-Receptor_Interactions	0.347397884043161
Axonal_Guidance_Signaling	Actin_Cytoskeleton_Signaling	0.347402481181476
Axonal_Guidance_Signaling	Integrin_Signaling	0.347402481181476
Axonal_Guidance_Signaling	CREB_Signaling_in_Neurons	0.347402481181476
Human_Embryonic_Stem_Cell_Pluripotency	RhoGDI_Signaling	0.347404897157685
CXCR4_Signaling	Role_of_JAK2_in_Hormone-like_Cytokine_Signaling	0.347414813629819
Ethanol_Degradation_IV	Epithelial_Adherens_Junction_Signaling	0.347418422449981
Putrescine_Degradation_III	EIF2_Signaling	0.347418923386733
Intrinsic_Prothrombin_Activation_Pathway	Glycogen_Degradation_II	0.347418923386733
Intrinsic_Prothrombin_Activation_Pathway	Dopamine_Degradation	0.347422424725904
Atherosclerosis_Signaling	TR/RXR_Activation	0.347422429943995
Growth_Hormone_Signaling	Thyroid_Cancer_Signaling	0.347425087379505
Atherosclerosis_Signaling	Fatty_Acid__-oxidation	0.347427940248264
Ethanol_Degradation_IV	Nitric_Oxide_Signaling_in_the_Cardiovascular_System	0.347428942121768
Protein_Ubiquitination_Pathway	Ovarian_Cancer_Signaling	0.347429583946981
Colorectal_Cancer_Metastasis_Signaling	cAMP-mediated_signaling	0.347432949615781
Calcium_Signaling	G_s_Signaling	0.347434452426037
Tryptophan_Degradation_X_(Mammalian,_via_Tryptamine)	Ovarian_Cancer_Signaling	0.347436957109795
CXCR4_Signaling	Ovarian_Cancer_Signaling	0.347437210046393
TR/RXR_Activation	DNA_damage-induced_14-3-3__Signaling	0.347443469287568
Calcium_Signaling	Ethanol_Degradation_II	0.347443469287568
Intrinsic_Prothrombin_Activation_Pathway	Antigen_Presentation_Pathway	0.347443902389134
Intrinsic_Prothrombin_Activation_Pathway	Glioma_Invasiveness_Signaling	0.347443902389134
Role_of_Osteoblasts,_Osteoclasts_and_Chondrocytes_in_Rheumatoid_Arthritis	Antigen_Presentation_Pathway	0.34744697584483
Role_of_Osteoblasts,_Osteoclasts_and_Chondrocytes_in_Rheumatoid_Arthritis	Glioma_Invasiveness_Signaling	0.34744697584483
Bladder_Cancer_Signaling	Role_of_Tissue_Factor_in_Cancer	0.34744697584483
Protein_Ubiquitination_Pathway	Endothelin-1_Signaling	0.347447481999673
Protein_Ubiquitination_Pathway	Gap_Junction_Signaling	0.347447481999673
Protein_Ubiquitination_Pathway	Synaptic_Long_Term_Depression	0.347447481999673
Protein_Ubiquitination_Pathway	Dendritic_Cell_Maturation	0.347447481999673
Protein_Ubiquitination_Pathway	Leukocyte_Extravasation_Signaling	0.347447481999673
Protein_Ubiquitination_Pathway	Eicosanoid_Signaling	0.347451061610211
Calcium_Signaling	TWEAK_Signaling	0.347453988959354
Role_of_Osteoblasts,_Osteoclasts_and_Chondrocytes_in_Rheumatoid_Arthritis	Prolactin_Signaling	0.347457495516616
Cellular_Effects_of_Sildenafil_(Viagra)	Role_of_IL-17A_in_Psoriasis	0.34745975495009
Cellular_Effects_of_Sildenafil_(Viagra)	tRNA_Splicing	0.34745975495009
Acute_Phase_Response_Signaling	Actin_Cytoskeleton_Signaling	0.347466512378147
Acute_Phase_Response_Signaling	Integrin_Signaling	0.347466512378147
Acute_Phase_Response_Signaling	CREB_Signaling_in_Neurons	0.347466512378147
Calcium_Signaling	Wnt/_-catenin_Signaling	0.347468015188402
Coagulation_System	cAMP-mediated_signaling	0.347474804031355
Intrinsic_Prothrombin_Activation_Pathway	Role_of_Tissue_Factor_in_Cancer	0.347479698494518
Acute_Phase_Response_Signaling	Role_of_JAK2_in_Hormone-like_Cytokine_Signaling	0.347480538607195
Fatty_Acid__-oxidation	G_s_Signaling	0.347485547974713
Role_of_Osteoblasts,_Osteoclasts_and_Chondrocytes_in_Rheumatoid_Arthritis	Cell_Cycle_Control_of_Chromosomal_Replication	0.347489054531975
Epithelial_Adherens_Junction_Signaling	Salvage_Pathways_of_Pyrimidine_Deoxyribonucleotides	0.347492561089237
Calcium_Signaling	Endothelin-1_Signaling	0.347492561089237
Calcium_Signaling	Gap_Junction_Signaling	0.347492561089237
Calcium_Signaling	Synaptic_Long_Term_Depression	0.347492561089237
Calcium_Signaling	Dendritic_Cell_Maturation	0.347492561089237
Calcium_Signaling	Leukocyte_Extravasation_Signaling	0.347492561089237
Human_Embryonic_Stem_Cell_Pluripotency	IL-8_Signaling	0.347496067646499
Human_Embryonic_Stem_Cell_Pluripotency	Cardiac_Hypertrophy_Signaling	0.347496067646499
Human_Embryonic_Stem_Cell_Pluripotency	CDK5_Signaling	0.347496067646499
Calcium_Signaling	Eicosanoid_Signaling	0.347496067646499
Calcium_Signaling	Thrombopoietin_Signaling	0.347496067646499
Colorectal_Cancer_Metastasis_Signaling	Ethanol_Degradation_IV	0.347499073267009
P2Y_Purigenic_Receptor_Signaling_Pathway	Prolactin_Signaling	0.347499574203761
Assembly_of_RNA_Polymerase_II_Complex	EIF2_Signaling	0.347499574203761
Salvage_Pathways_of_Pyrimidine_Deoxyribonucleotides	Nitric_Oxide_Signaling_in_the_Cardiovascular_System	0.347503080761023
Axonal_Guidance_Signaling	Induction_of_Apoptosis_by_HIV1	0.347506289887089
Role_of_Macrophages,_Fibroblasts_and_Endothelial_Cells_in_Rheumatoid_Arthritis	Putrescine_Degradation_III	0.34750634475389
TR/RXR_Activation	G_s_Signaling	0.347515103243065
HIF1__Signaling	Glycine_Betaine_Degradation	0.347515494599902
Human_Embryonic_Stem_Cell_Pluripotency	Induction_of_Apoptosis_by_HIV1	0.347520613547333
Tryptophan_Degradation_X_(Mammalian,_via_Tryptamine)	Actin_Cytoskeleton_Signaling	0.347521114484085
Tryptophan_Degradation_X_(Mammalian,_via_Tryptamine)	Integrin_Signaling	0.347521114484085
Tryptophan_Degradation_X_(Mammalian,_via_Tryptamine)	CREB_Signaling_in_Neurons	0.347521114484085
Fatty_Acid__-oxidation	TWEAK_Signaling	0.34752261729434
TR/RXR_Activation	Wnt/_-catenin_Signaling	0.347524120104596
Glioblastoma_Multiforme_Signaling	Intrinsic_Prothrombin_Activation_Pathway	0.347526233431517
CXCR4_Signaling	Hepatic_Fibrosis_/_Hepatic_Stellate_Cell_Activation	0.347526795712686
CXCR4_Signaling	Sperm_Motility	0.347526795712686
CXCR4_Signaling	ILK_Signaling	0.347526795712686
Role_of_Osteoblasts,_Osteoclasts_and_Chondrocytes_in_Rheumatoid_Arthritis	Role_of_Tissue_Factor_in_Cancer	0.347527626661858
HIF1__Signaling	Cell_Cycle_Control_of_Chromosomal_Replication	0.347529813042055
Coagulation_System	Ethanol_Degradation_IV	0.347532394816829
TR/RXR_Activation	TWEAK_Signaling	0.347534639776382
Bladder_Cancer_Signaling	Histamine_Degradation	0.347538146333644
Bladder_Cancer_Signaling	Noradrenaline_and_Adrenaline_Degradation	0.347538146333644
Calcium_Signaling	Agranulocyte_Adhesion_and_Diapedesis	0.347538146333644
Calcium_Signaling	RAR_Activation	0.347538146333644
Calcium_Signaling	LPS/IL-1_Mediated_Inhibition_of_RXR_Function	0.347538146333644
Calcium_Signaling	Oncostatin_M_Signaling	0.347538146333644
Calcium_Signaling	Tryptophan_Degradation_to_2-amino-3-carboxymuconate_Semialdehyde	0.347538146333644
Tryptophan_Degradation_X_(Mammalian,_via_Tryptamine)	DNA_damage-induced_14-3-3__Signaling	0.347538647270396
Intrinsic_Prothrombin_Activation_Pathway	Basal_Cell_Carcinoma_Signaling	0.34754055187367
P2Y_Purigenic_Receptor_Signaling_Pathway	Antigen_Presentation_Pathway	0.347541652890906
P2Y_Purigenic_Receptor_Signaling_Pathway	Glioma_Invasiveness_Signaling	0.347541652890906
TR/RXR_Activation	Ethanol_Degradation_II	0.347541652890906
EIF2_Signaling	cAMP-mediated_signaling	0.347541652890906
Assembly_of_RNA_Polymerase_II_Complex	Prolactin_Signaling	0.347545159448168
HIF1__Signaling	Antigen_Presentation_Pathway	0.347547711094747
HIF1__Signaling	Glioma_Invasiveness_Signaling	0.347547711094747
Axonal_Guidance_Signaling	GDNF_Family_Ligand-Receptor_Interactions	0.347549245213549
P2Y_Purigenic_Receptor_Signaling_Pathway	Glycine_Betaine_Degradation	0.347552172562692
Growth_Hormone_Signaling	Estrogen_Receptor_Signaling	0.347555627602211
Axonal_Guidance_Signaling	RhoGDI_Signaling	0.347556404434626
CXCR4_Signaling	RhoGDI_Signaling	0.34755665760145
Protein_Ubiquitination_Pathway	Actin_Cytoskeleton_Signaling	0.347558449926362
Protein_Ubiquitination_Pathway	Integrin_Signaling	0.347558449926362
Protein_Ubiquitination_Pathway	CREB_Signaling_in_Neurons	0.347558449926362
Calcium_Signaling	Cell_Cycle_Control_of_Chromosomal_Replication	0.347559185677216
HIF1__Signaling	Dopamine_Degradation	0.347562029536901
Protein_Ubiquitination_Pathway	Role_of_JAK2_in_Hormone-like_Cytokine_Signaling	0.347562029536901
Intrinsic_Prothrombin_Activation_Pathway	VDR/RXR_Activation	0.347562029536901
Assembly_of_RNA_Polymerase_II_Complex	Glycine_Betaine_Degradation	0.347562692234478
Role_of_Osteoblasts,_Osteoclasts_and_Chondrocytes_in_Rheumatoid_Arthritis	VDR/RXR_Activation	0.347562692234478
Bladder_Cancer_Signaling	Basal_Cell_Carcinoma_Signaling	0.347562692234478
Fatty_Acid__-oxidation	Thrombopoietin_Signaling	0.347564695981485
Role_of_Macrophages,_Fibroblasts_and_Endothelial_Cells_in_Rheumatoid_Arthritis	cAMP-mediated_signaling	0.347564783276564
Relaxin_Signaling	TR/RXR_Activation	0.347565609147439
Intrinsic_Prothrombin_Activation_Pathway	Histamine_Degradation	0.347565609147439
Intrinsic_Prothrombin_Activation_Pathway	Noradrenaline_and_Adrenaline_Degradation	0.347565609147439
HIF1__Signaling	GDNF_Family_Ligand-Receptor_Interactions	0.347566198791741
P2Y_Purigenic_Receptor_Signaling_Pathway	Cell_Cycle_Control_of_Chromosomal_Replication	0.347566198791741
Bladder_Cancer_Signaling	Inhibition_of_Matrix_Metalloproteases	0.347566198791741
Ethanol_Degradation_IV	EIF2_Signaling	0.347572710969513
TR/RXR_Activation	Endothelin-1_Signaling	0.347573211906265
TR/RXR_Activation	Gap_Junction_Signaling	0.347573211906265
TR/RXR_Activation	Synaptic_Long_Term_Depression	0.347573211906265
TR/RXR_Activation	Dendritic_Cell_Maturation	0.347573211906265
TR/RXR_Activation	Leukocyte_Extravasation_Signaling	0.347573211906265
Factors_Promoting_Cardiogenesis_in_Vertebrates	Protein_Ubiquitination_Pathway	0.347574404761905
Fatty_Acid__-oxidation	Wnt/_-catenin_Signaling	0.347575215653272
TR/RXR_Activation	Thrombopoietin_Signaling	0.347576718463527
Fatty_Acid__-oxidation	Endothelin-1_Signaling	0.347578722210534
Fatty_Acid__-oxidation	Gap_Junction_Signaling	0.347578722210534
Fatty_Acid__-oxidation	Synaptic_Long_Term_Depression	0.347578722210534
Fatty_Acid__-oxidation	Dendritic_Cell_Maturation	0.347578722210534
Fatty_Acid__-oxidation	Leukocyte_Extravasation_Signaling	0.347578722210534
Acute_Phase_Response_Signaling	Factors_Promoting_Cardiogenesis_in_Vertebrates	0.347590666421208
Acute_Phase_Response_Signaling	Hepatic_Fibrosis_/_Hepatic_Stellate_Cell_Activation	0.347592748439582
Acute_Phase_Response_Signaling	Sperm_Motility	0.347592748439582
Acute_Phase_Response_Signaling	ILK_Signaling	0.347592748439582
TR/RXR_Activation	Eicosanoid_Signaling	0.347594251249837
CXCR4_Signaling	Induction_of_Apoptosis_by_HIV1	0.347605183170693
Human_Embryonic_Stem_Cell_Pluripotency	Extrinsic_Prothrombin_Activation_Pathway	0.347606273731879
Axonal_Guidance_Signaling	Hepatic_Fibrosis_/_Hepatic_Stellate_Cell_Activation	0.347606518982163
Axonal_Guidance_Signaling	Sperm_Motility	0.347606518982163
Axonal_Guidance_Signaling	ILK_Signaling	0.347606518982163
Fatty_Acid__-oxidation	Agranulocyte_Adhesion_and_Diapedesis	0.34760677466863
Fatty_Acid__-oxidation	RAR_Activation	0.34760677466863
Fatty_Acid__-oxidation	LPS/IL-1_Mediated_Inhibition_of_RXR_Function	0.34760677466863
Fatty_Acid__-oxidation	Oncostatin_M_Signaling	0.34760677466863
Fatty_Acid__-oxidation	Tryptophan_Degradation_to_2-amino-3-carboxymuconate_Semialdehyde	0.34760677466863
P2Y_Purigenic_Receptor_Signaling_Pathway	Dopamine_Degradation	0.347608277478886
Colorectal_Cancer_Metastasis_Signaling	Salvage_Pathways_of_Pyrimidine_Deoxyribonucleotides	0.347608277478886
Tryptophan_Degradation_X_(Mammalian,_via_Tryptamine)	Role_of_JAK2_in_Hormone-like_Cytokine_Signaling	0.347615791530161
Assembly_of_RNA_Polymerase_II_Complex	Dopamine_Degradation	0.347618797150672
TR/RXR_Activation	Agranulocyte_Adhesion_and_Diapedesis	0.347618797150672
TR/RXR_Activation	RAR_Activation	0.347618797150672
TR/RXR_Activation	LPS/IL-1_Mediated_Inhibition_of_RXR_Function	0.347618797150672
TR/RXR_Activation	Oncostatin_M_Signaling	0.347618797150672
TR/RXR_Activation	Tryptophan_Degradation_to_2-amino-3-carboxymuconate_Semialdehyde	0.347618797150672
Calcium_Signaling	Ovarian_Cancer_Signaling	0.347618797150672
P2Y_Purigenic_Receptor_Signaling_Pathway	Role_of_Tissue_Factor_in_Cancer	0.347622303707934
Assembly_of_RNA_Polymerase_II_Complex	Antigen_Presentation_Pathway	0.347622303707934
Assembly_of_RNA_Polymerase_II_Complex	Glioma_Invasiveness_Signaling	0.347622303707934
CXCR4_Signaling	Factors_Promoting_Cardiogenesis_in_Vertebrates	0.347623950060463
HIF1__Signaling	Role_of_Tissue_Factor_in_Cancer	0.34763004213713
Acute_Phase_Response_Signaling	Induction_of_Apoptosis_by_HIV1	0.347631320569465
Fatty_Acid__-oxidation	Ethanol_Degradation_II	0.347631320569465
Assembly_of_RNA_Polymerase_II_Complex	Role_of_Tissue_Factor_in_Cancer	0.34763282337972
Axonal_Guidance_Signaling	IL-8_Signaling	0.347649474308624
Axonal_Guidance_Signaling	Cardiac_Hypertrophy_Signaling	0.347649474308624
Axonal_Guidance_Signaling	CDK5_Signaling	0.347649474308624
Assembly_of_RNA_Polymerase_II_Complex	VDR/RXR_Activation	0.34765035616603
Acute_Phase_Response_Signaling	RhoGDI_Signaling	0.347652359913037
Glioblastoma_Multiforme_Signaling	Role_of_Osteoblasts,_Osteoclasts_and_Chondrocytes_in_Rheumatoid_Arthritis	0.347653862723293
P2Y_Purigenic_Receptor_Signaling_Pathway	VDR/RXR_Activation	0.347657369280555
Role_of_Macrophages,_Fibroblasts_and_Endothelial_Cells_in_Rheumatoid_Arthritis	Salvage_Pathways_of_Pyrimidine_Deoxyribonucleotides	0.347662180814355
HIF1__Signaling	VDR/RXR_Activation	0.347665838242514
Acute_Phase_Response_Signaling	G_Beta_Gamma_Signaling	0.347667888952341
Tryptophan_Degradation_X_(Mammalian,_via_Tryptamine)	G_Beta_Gamma_Signaling	0.347669892699348
Tryptophan_Degradation_X_(Mammalian,_via_Tryptamine)	Hepatic_Fibrosis_/_Hepatic_Stellate_Cell_Activation	0.347675403003617
Tryptophan_Degradation_X_(Mammalian,_via_Tryptamine)	Sperm_Motility	0.347675403003617
Tryptophan_Degradation_X_(Mammalian,_via_Tryptamine)	ILK_Signaling	0.347675403003617
Role_of_Macrophages,_Fibroblasts_and_Endothelial_Cells_in_Rheumatoid_Arthritis	Ethanol_Degradation_IV	0.347677207863042
Assembly_of_RNA_Polymerase_II_Complex	Cell_Cycle_Control_of_Chromosomal_Replication	0.347678408624127
Role_of_Osteoblasts,_Osteoclasts_and_Chondrocytes_in_Rheumatoid_Arthritis	Inhibition_of_Matrix_Metalloproteases	0.347681915181389
Salvage_Pathways_of_Pyrimidine_Deoxyribonucleotides	EIF2_Signaling	0.347681915181389
Fatty_Acid__-oxidation	Eicosanoid_Signaling	0.347683918928396
Role_of_Osteoblasts,_Osteoclasts_and_Chondrocytes_in_Rheumatoid_Arthritis	Basal_Cell_Carcinoma_Signaling	0.347685421738651
TR/RXR_Activation	Ovarian_Cancer_Signaling	0.347688928295913
Relaxin_Signaling	Intrinsic_Prothrombin_Activation_Pathway	0.347689797410192
HIF1__Signaling	Basal_Cell_Carcinoma_Signaling	0.347690895516282
Relaxin_Signaling	Bladder_Cancer_Signaling	0.347701634347897
HIF1__Signaling	Histamine_Degradation	0.347705213958436
HIF1__Signaling	Noradrenaline_and_Adrenaline_Degradation	0.347705213958436
CXCR4_Signaling	IL-8_Signaling	0.347705967045273
CXCR4_Signaling	Cardiac_Hypertrophy_Signaling	0.347705967045273
CXCR4_Signaling	CDK5_Signaling	0.347705967045273
Role_of_Osteoblasts,_Osteoclasts_and_Chondrocytes_in_Rheumatoid_Arthritis	Histamine_Degradation	0.347706461082224
Role_of_Osteoblasts,_Osteoclasts_and_Chondrocytes_in_Rheumatoid_Arthritis	Noradrenaline_and_Adrenaline_Degradation	0.347706461082224
Growth_Hormone_Signaling	Caveolar-mediated_Endocytosis_Signaling	0.347709488189853
Growth_Hormone_Signaling	Regulation_of_eIF4_and_p70S6K_Signaling	0.347709488189853
HIF1__Signaling	Coagulation_System	0.347710287500953
Human_Embryonic_Stem_Cell_Pluripotency	Glycogen_Degradation_II	0.347711470449741
Tryptophan_Degradation_X_(Mammalian,_via_Tryptamine)	GDNF_Family_Ligand-Receptor_Interactions	0.347717481690762
Cellular_Effects_of_Sildenafil_(Viagra)	Macropinocytosis_Signaling	0.347717486908853
Tryptophan_Degradation_X_(Mammalian,_via_Tryptamine)	Induction_of_Apoptosis_by_HIV1	0.347720988248024
Retinoate_Biosynthesis_I	Tryptophan_Degradation_X_(Mammalian,_via_Tryptamine)	0.347722692147034
Putrescine_Degradation_III	Thrombin_Signaling	0.347723993868534
Tryptophan_Degradation_X_(Mammalian,_via_Tryptamine)	RhoGDI_Signaling	0.347724494805286
Acute_Phase_Response_Signaling	GDNF_Family_Ligand-Receptor_Interactions	0.347725997615541
Nitric_Oxide_Signaling_in_the_Cardiovascular_System	Leptin_Signaling_in_Obesity	0.347729504172803
Glioblastoma_Multiforme_Signaling	Assembly_of_RNA_Polymerase_II_Complex	0.347731006983058
Coagulation_System	Salvage_Pathways_of_Pyrimidine_Deoxyribonucleotides	0.347736095558044
Fatty_Acid__-oxidation	DNA_damage-induced_14-3-3__Signaling	0.347736517287327
Epithelial_Adherens_Junction_Signaling	Leptin_Signaling_in_Obesity	0.347736517287327
Protein_Ubiquitination_Pathway	G_Beta_Gamma_Signaling	0.347738964572083
CXCR4_Signaling	G_Beta_Gamma_Signaling	0.347744894150269
P2Y_Purigenic_Receptor_Signaling_Pathway	Histamine_Degradation	0.347748539769369
P2Y_Purigenic_Receptor_Signaling_Pathway	Noradrenaline_and_Adrenaline_Degradation	0.347748539769369
Calcium_Signaling	Role_of_JAK2_in_Hormone-like_Cytokine_Signaling	0.347748539769369
Factors_Promoting_Cardiogenesis_in_Vertebrates	Tryptophan_Degradation_X_(Mammalian,_via_Tryptamine)	0.347750214776632
Fatty_Acid__-oxidation	Ovarian_Cancer_Signaling	0.347750543516376
P2Y_Purigenic_Receptor_Signaling_Pathway	Glioblastoma_Multiforme_Signaling	0.347755552883893
Assembly_of_RNA_Polymerase_II_Complex	Histamine_Degradation	0.347759059441155
Assembly_of_RNA_Polymerase_II_Complex	Noradrenaline_and_Adrenaline_Degradation	0.347759059441155
Acute_Phase_Response_Signaling	IL-8_Signaling	0.347761063188162
Acute_Phase_Response_Signaling	Cardiac_Hypertrophy_Signaling	0.347761063188162
Acute_Phase_Response_Signaling	CDK5_Signaling	0.347761063188162
Axonal_Guidance_Signaling	Extrinsic_Prothrombin_Activation_Pathway	0.347761976354115
Calcium_Signaling	Actin_Cytoskeleton_Signaling	0.347762565998417
Calcium_Signaling	Integrin_Signaling	0.347762565998417
Calcium_Signaling	CREB_Signaling_in_Neurons	0.347762565998417
tRNA_Charging	Putrescine_Degradation_III	0.347765957446808
P2Y_Purigenic_Receptor_Signaling_Pathway	Regulation_of_the_Epithelial-Mesenchymal_Transition_Pathway	0.347769579112941
Putrescine_Degradation_III	Regulation_of_the_Epithelial-Mesenchymal_Transition_Pathway	0.347769579112941
CXCR4_Signaling	Extrinsic_Prothrombin_Activation_Pathway	0.347771023302938
Assembly_of_RNA_Polymerase_II_Complex	Basal_Cell_Carcinoma_Signaling	0.347773085670203
Protein_Ubiquitination_Pathway	Induction_of_Apoptosis_by_HIV1	0.347773226558665
P2Y_Purigenic_Receptor_Signaling_Pathway	Inhibition_of_Matrix_Metalloproteases	0.347776592227465
Colorectal_Cancer_Metastasis_Signaling	Leptin_Signaling_in_Obesity	0.347782102531734
Assembly_of_RNA_Polymerase_II_Complex	Inhibition_of_Matrix_Metalloproteases	0.347787111899252
Protein_Ubiquitination_Pathway	GDNF_Family_Ligand-Receptor_Interactions	0.347787545000818
Retinoate_Biosynthesis_I	Calcium_Signaling	0.347791614452799
Human_Embryonic_Stem_Cell_Pluripotency	Cardiac__-adrenergic_Signaling	0.347797631571038
Retinoate_Biosynthesis_I	Fatty_Acid__-oxidation	0.347801012949039
Glioblastoma_Multiforme_Signaling	Bladder_Cancer_Signaling	0.3478011381283
Atherosclerosis_Signaling	Bladder_Cancer_Signaling	0.347811657800086
Thrombin_Signaling	cAMP-mediated_signaling	0.347811657800086
P2Y_Purigenic_Receptor_Signaling_Pathway	Basal_Cell_Carcinoma_Signaling	0.347815164357348
Tryptophan_Degradation_X_(Mammalian,_via_Tryptamine)	IL-8_Signaling	0.3478156652941
Tryptophan_Degradation_X_(Mammalian,_via_Tryptamine)	Cardiac_Hypertrophy_Signaling	0.3478156652941
Tryptophan_Degradation_X_(Mammalian,_via_Tryptamine)	CDK5_Signaling	0.3478156652941
Axonal_Guidance_Signaling	Role_of_CHK_Proteins_in_Cell_Cycle_Checkpoint_Control	0.347819250122729
Bladder_Cancer_Signaling	Wnt/_-catenin_Signaling	0.347822177471872
HIF1__Signaling	Inhibition_of_Matrix_Metalloproteases	0.347823341106202
Bladder_Cancer_Signaling	G_s_Signaling	0.347823680282128
Regulation_of_the_Epithelial-Mesenchymal_Transition_Pathway	cAMP-mediated_signaling	0.347829190586397
Protein_Ubiquitination_Pathway	Hepatic_Fibrosis_/_Hepatic_Stellate_Cell_Activation	0.347834079937817
Protein_Ubiquitination_Pathway	Sperm_Motility	0.347834079937817
Protein_Ubiquitination_Pathway	ILK_Signaling	0.347834079937817
Role_of_Macrophages,_Fibroblasts_and_Endothelial_Cells_in_Rheumatoid_Arthritis	Nitric_Oxide_Signaling_in_the_Cardiovascular_System	0.347835826710301
Relaxin_Signaling	Role_of_Osteoblasts,_Osteoclasts_and_Chondrocytes_in_Rheumatoid_Arthritis	0.347837659548355
tRNA_Charging	cAMP-mediated_signaling	0.34784061216872
Fatty_Acid__-oxidation	Actin_Cytoskeleton_Signaling	0.34784171400519
Fatty_Acid__-oxidation	Integrin_Signaling	0.34784171400519
Fatty_Acid__-oxidation	CREB_Signaling_in_Neurons	0.34784171400519
HIF1__Signaling	Relaxin_Signaling	0.347843306182122
Intrinsic_Prothrombin_Activation_Pathway	Ethanol_Degradation_II	0.347844818769432
Intrinsic_Prothrombin_Activation_Pathway	G_s_Signaling	0.347846352888234
Coagulation_System	Leptin_Signaling_in_Obesity	0.34784647789687
Bladder_Cancer_Signaling	DNA_damage-induced_14-3-3__Signaling	0.347850229929969
Bladder_Cancer_Signaling	Ethanol_Degradation_II	0.347850229929969
CXCR4_Signaling	GDNF_Family_Ligand-Receptor_Interactions	0.347851543753
Acute_Phase_Response_Signaling	Extrinsic_Prothrombin_Activation_Pathway	0.347853736487231
Axonal_Guidance_Signaling	G_s_Signaling	0.347855046228113
Intrinsic_Prothrombin_Activation_Pathway	Wnt/_-catenin_Signaling	0.347855557601047
EIF2_Signaling	Leptin_Signaling_in_Obesity	0.347855740234238
TR/RXR_Activation	Role_of_JAK2_in_Hormone-like_Cytokine_Signaling	0.347857243044493
Role_of_Osteoblasts,_Osteoclasts_and_Chondrocytes_in_Rheumatoid_Arthritis	Glycine_Betaine_Degradation	0.347860749601755
Atherosclerosis_Signaling	Role_of_Osteoblasts,_Osteoclasts_and_Chondrocytes_in_Rheumatoid_Arthritis	0.347864256159017
Bladder_Cancer_Signaling	Thrombopoietin_Signaling	0.347867762716279
Axonal_Guidance_Signaling	Glycogen_Degradation_II	0.347869364670267
Atherosclerosis_Signaling	Intrinsic_Prothrombin_Activation_Pathway	0.347869876043201
Retinoate_Biosynthesis_I	TR/RXR_Activation	0.347872023809524
CXCR4_Signaling	Role_of_CHK_Proteins_in_Cell_Cycle_Checkpoint_Control	0.347873406921559
HIF1__Signaling	Glioblastoma_Multiforme_Signaling	0.347873455653739
Epithelial_Adherens_Junction_Signaling	Nitric_Oxide_Signaling_in_the_Cardiovascular_System	0.347874775830804
Ethanol_Degradation_IV	Thrombin_Signaling	0.347877781451314
CXCR4_Signaling	Glycogen_Degradation_II	0.347883005385805
Protein_Ubiquitination_Pathway	IL-8_Signaling	0.347887774095893
Protein_Ubiquitination_Pathway	Cardiac_Hypertrophy_Signaling	0.347887774095893
Protein_Ubiquitination_Pathway	CDK5_Signaling	0.347887774095893
Ethanol_Degradation_IV	Regulation_of_the_Epithelial-Mesenchymal_Transition_Pathway	0.347895314237624
Intrinsic_Prothrombin_Activation_Pathway	Eicosanoid_Signaling	0.347898512927508
Human_Embryonic_Stem_Cell_Pluripotency	Role_of_CHK_Proteins_in_Cell_Cycle_Checkpoint_Control	0.347900824541893
Role_of_Osteoblasts,_Osteoclasts_and_Chondrocytes_in_Rheumatoid_Arthritis	DNA_damage-induced_14-3-3__Signaling	0.3479028282889
Bladder_Cancer_Signaling	Eicosanoid_Signaling	0.3479028282889
Human_Embryonic_Stem_Cell_Pluripotency	Role_of_IL-17A_in_Psoriasis	0.347907837656417
Human_Embryonic_Stem_Cell_Pluripotency	tRNA_Splicing	0.347907837656417
Fatty_Acid__-oxidation	Role_of_JAK2_in_Hormone-like_Cytokine_Signaling	0.347908338593169
Assembly_of_RNA_Polymerase_II_Complex	Relaxin_Signaling	0.347912831369661
Intrinsic_Prothrombin_Activation_Pathway	Thrombopoietin_Signaling	0.347919990590738
Calcium_Signaling	G_Beta_Gamma_Signaling	0.347921863885466
Bladder_Cancer_Signaling	Agranulocyte_Adhesion_and_Diapedesis	0.347927374189735
Bladder_Cancer_Signaling	RAR_Activation	0.347927374189735
Bladder_Cancer_Signaling	LPS/IL-1_Mediated_Inhibition_of_RXR_Function	0.347927374189735
Bladder_Cancer_Signaling	Oncostatin_M_Signaling	0.347927374189735
Bladder_Cancer_Signaling	Tryptophan_Degradation_to_2-amino-3-carboxymuconate_Semialdehyde	0.347927374189735
tRNA_Charging	Ethanol_Degradation_IV	0.347929664586999
Cellular_Effects_of_Sildenafil_(Viagra)	Thyroid_Cancer_Signaling	0.347932263541155
Bladder_Cancer_Signaling	Endothelin-1_Signaling	0.347934387304259
Bladder_Cancer_Signaling	Gap_Junction_Signaling	0.347934387304259
Bladder_Cancer_Signaling	Synaptic_Long_Term_Depression	0.347934387304259
Bladder_Cancer_Signaling	Dendritic_Cell_Maturation	0.347934387304259
Bladder_Cancer_Signaling	Leukocyte_Extravasation_Signaling	0.347934387304259
Acute_Phase_Response_Signaling	Role_of_CHK_Proteins_in_Cell_Cycle_Checkpoint_Control	0.347944906976045
Putrescine_Degradation_III	Prolactin_Signaling	0.347944906976045
Calcium_Signaling	Induction_of_Apoptosis_by_HIV1	0.347944906976045
HIF1__Signaling	Prolactin_Signaling	0.347945047864507
TR/RXR_Activation	Hepatic_Fibrosis_/_Hepatic_Stellate_Cell_Activation	0.347951920090569
TR/RXR_Activation	Sperm_Motility	0.347951920090569
TR/RXR_Activation	Actin_Cytoskeleton_Signaling	0.347951920090569
TR/RXR_Activation	Integrin_Signaling	0.347951920090569
TR/RXR_Activation	CREB_Signaling_in_Neurons	0.347951920090569
TR/RXR_Activation	ILK_Signaling	0.347951920090569
Intrinsic_Prothrombin_Activation_Pathway	Agranulocyte_Adhesion_and_Diapedesis	0.347952207085583
Intrinsic_Prothrombin_Activation_Pathway	RAR_Activation	0.347952207085583
Intrinsic_Prothrombin_Activation_Pathway	LPS/IL-1_Mediated_Inhibition_of_RXR_Function	0.347952207085583
Intrinsic_Prothrombin_Activation_Pathway	Oncostatin_M_Signaling	0.347952207085583
Intrinsic_Prothrombin_Activation_Pathway	Tryptophan_Degradation_to_2-amino-3-carboxymuconate_Semialdehyde	0.347952207085583
Colorectal_Cancer_Metastasis_Signaling	Nitric_Oxide_Signaling_in_the_Cardiovascular_System	0.347955426647831
Intrinsic_Prothrombin_Activation_Pathway	DNA_damage-induced_14-3-3__Signaling	0.347955786696122
Fatty_Acid__-oxidation	Hepatic_Fibrosis_/_Hepatic_Stellate_Cell_Activation	0.347957430394838
Fatty_Acid__-oxidation	Sperm_Motility	0.347957430394838
Fatty_Acid__-oxidation	ILK_Signaling	0.347957430394838
Acute_Phase_Response_Signaling	Glycogen_Degradation_II	0.347958933205094
P2Y_Purigenic_Receptor_Signaling_Pathway	Atherosclerosis_Signaling	0.347958933205094
Bladder_Cancer_Signaling	TWEAK_Signaling	0.347958933205094
Putrescine_Degradation_III	Antigen_Presentation_Pathway	0.347962439762356
Putrescine_Degradation_III	Glioma_Invasiveness_Signaling	0.347962439762356
Fatty_Acid__-oxidation	G_Beta_Gamma_Signaling	0.347962439762356
Calcium_Signaling	RhoGDI_Signaling	0.347965946319618
Role_of_Osteoblasts,_Osteoclasts_and_Chondrocytes_in_Rheumatoid_Arthritis	G_s_Signaling	0.347967449129873
Calcium_Signaling	GDNF_Family_Ligand-Receptor_Interactions	0.34796945287688
P2Y_Purigenic_Receptor_Signaling_Pathway	Relaxin_Signaling	0.347970105138275
Assembly_of_RNA_Polymerase_II_Complex	DNA_damage-induced_14-3-3__Signaling	0.347972959434142
HIF1__Signaling	Atherosclerosis_Signaling	0.347973684748814
P2Y_Purigenic_Receptor_Signaling_Pathway	DNA_damage-induced_14-3-3__Signaling	0.347979972548666
Colorectal_Cancer_Metastasis_Signaling	Epithelial_Adherens_Junction_Signaling	0.347979972548666
Salvage_Pathways_of_Pyrimidine_Deoxyribonucleotides	Thrombin_Signaling	0.34798698566319
Role_of_Osteoblasts,_Osteoclasts_and_Chondrocytes_in_Rheumatoid_Arthritis	Wnt/_-catenin_Signaling	0.347990492220452
Tryptophan_Degradation_X_(Mammalian,_via_Tryptamine)	TWEAK_Signaling	0.347990993157204
Role_of_Macrophages,_Fibroblasts_and_Endothelial_Cells_in_Rheumatoid_Arthritis	Leptin_Signaling_in_Obesity	0.347991662770765
TR/RXR_Activation	G_Beta_Gamma_Signaling	0.347991995030707
HIF1__Signaling	G_s_Signaling	0.347996696530846
Axonal_Guidance_Signaling	Cardiac__-adrenergic_Signaling	0.347996696530846
Salvage_Pathways_of_Pyrimidine_Deoxyribonucleotides	Regulation_of_the_Epithelial-Mesenchymal_Transition_Pathway	0.348004518449501
HIF1__Signaling	Wnt/_-catenin_Signaling	0.348005901243659
Protein_Ubiquitination_Pathway	Extrinsic_Prothrombin_Activation_Pathway	0.348011014972999
Fatty_Acid__-oxidation	Induction_of_Apoptosis_by_HIV1	0.348013535311032
P2Y_Purigenic_Receptor_Signaling_Pathway	Wnt/_-catenin_Signaling	0.348015038121287
Role_of_Osteoblasts,_Osteoclasts_and_Chondrocytes_in_Rheumatoid_Arthritis	Endothelin-1_Signaling	0.348015038121287
Role_of_Osteoblasts,_Osteoclasts_and_Chondrocytes_in_Rheumatoid_Arthritis	Gap_Junction_Signaling	0.348015038121287
Role_of_Osteoblasts,_Osteoclasts_and_Chondrocytes_in_Rheumatoid_Arthritis	Synaptic_Long_Term_Depression	0.348015038121287
Role_of_Osteoblasts,_Osteoclasts_and_Chondrocytes_in_Rheumatoid_Arthritis	Dendritic_Cell_Maturation	0.348015038121287
Role_of_Osteoblasts,_Osteoclasts_and_Chondrocytes_in_Rheumatoid_Arthritis	Leukocyte_Extravasation_Signaling	0.348015038121287
Prolactin_Signaling	cAMP-mediated_signaling	0.348015038121287
HIF1__Signaling	TWEAK_Signaling	0.348016640075274
Role_of_Osteoblasts,_Osteoclasts_and_Chondrocytes_in_Rheumatoid_Arthritis	Ethanol_Degradation_II	0.348018544678549
Role_of_Osteoblasts,_Osteoclasts_and_Chondrocytes_in_Rheumatoid_Arthritis	Thrombopoietin_Signaling	0.348018544678549
Factors_Promoting_Cardiogenesis_in_Vertebrates	Fatty_Acid__-oxidation	0.348020219685812
Protein_Ubiquitination_Pathway	Relaxin_Signaling	0.348022399749373
HIF1__Signaling	Ethanol_Degradation_II	0.348023799296351
Intrinsic_Prothrombin_Activation_Pathway	Ovarian_Cancer_Signaling	0.348023799296351
Intrinsic_Prothrombin_Activation_Pathway	Endothelin-1_Signaling	0.348023799296351
Intrinsic_Prothrombin_Activation_Pathway	Gap_Junction_Signaling	0.348023799296351
Intrinsic_Prothrombin_Activation_Pathway	Synaptic_Long_Term_Depression	0.348023799296351
Intrinsic_Prothrombin_Activation_Pathway	Dendritic_Cell_Maturation	0.348023799296351
Intrinsic_Prothrombin_Activation_Pathway	Leukocyte_Extravasation_Signaling	0.348023799296351
tRNA_Charging	Calcium_Signaling	0.348027248973498
Tryptophan_Degradation_X_(Mammalian,_via_Tryptamine)	Role_of_CHK_Proteins_in_Cell_Cycle_Checkpoint_Control	0.34802756154008
EIF2_Signaling	Nitric_Oxide_Signaling_in_the_Cardiovascular_System	0.348029064350335
Coagulation_System	Nitric_Oxide_Signaling_in_the_Cardiovascular_System	0.348030981709593
Fatty_Acid__-oxidation	RhoGDI_Signaling	0.348034574654604
TR/RXR_Activation	GDNF_Family_Ligand-Receptor_Interactions	0.348039584022121
cAMP-mediated_signaling	Antigen_Presentation_Pathway	0.348039584022121
cAMP-mediated_signaling	Glioma_Invasiveness_Signaling	0.348039584022121
Putrescine_Degradation_III	Role_of_Tissue_Factor_in_Cancer	0.348043090579383
Assembly_of_RNA_Polymerase_II_Complex	Wnt/_-catenin_Signaling	0.348043090579383
Assembly_of_RNA_Polymerase_II_Complex	G_s_Signaling	0.348044593389639
CXCR4_Signaling	Cardiac__-adrenergic_Signaling	0.348045646029969
TR/RXR_Activation	RhoGDI_Signaling	0.348046597136646
Atherosclerosis_Signaling	Assembly_of_RNA_Polymerase_II_Complex	0.348050103693908
Factors_Promoting_Cardiogenesis_in_Vertebrates	Calcium_Signaling	0.348050390688922
P2Y_Purigenic_Receptor_Signaling_Pathway	TWEAK_Signaling	0.34805361025117
Putrescine_Degradation_III	Dopamine_Degradation	0.34805361025117
Assembly_of_RNA_Polymerase_II_Complex	Ethanol_Degradation_II	0.34805361025117
P2Y_Purigenic_Receptor_Signaling_Pathway	Ethanol_Degradation_II	0.348060623365694
Role_of_Osteoblasts,_Osteoclasts_and_Chondrocytes_in_Rheumatoid_Arthritis	Agranulocyte_Adhesion_and_Diapedesis	0.348060623365694
Role_of_Osteoblasts,_Osteoclasts_and_Chondrocytes_in_Rheumatoid_Arthritis	RAR_Activation	0.348060623365694
Role_of_Osteoblasts,_Osteoclasts_and_Chondrocytes_in_Rheumatoid_Arthritis	LPS/IL-1_Mediated_Inhibition_of_RXR_Function	0.348060623365694
Role_of_Osteoblasts,_Osteoclasts_and_Chondrocytes_in_Rheumatoid_Arthritis	Oncostatin_M_Signaling	0.348060623365694
Role_of_Osteoblasts,_Osteoclasts_and_Chondrocytes_in_Rheumatoid_Arthritis	Tryptophan_Degradation_to_2-amino-3-carboxymuconate_Semialdehyde	0.348060623365694
Acute_Phase_Response_Signaling	Cardiac__-adrenergic_Signaling	0.348062627112701
HIF1__Signaling	DNA_damage-induced_14-3-3__Signaling	0.348063175012273
Assembly_of_RNA_Polymerase_II_Complex	TWEAK_Signaling	0.348064129922956
Calcium_Signaling	Hepatic_Fibrosis_/_Hepatic_Stellate_Cell_Activation	0.348064129922956
Calcium_Signaling	Sperm_Motility	0.348064129922956
Calcium_Signaling	ILK_Signaling	0.348064129922956
tRNA_Charging	P2Y_Purigenic_Receptor_Signaling_Pathway	0.348068309070549
P2Y_Purigenic_Receptor_Signaling_Pathway	G_s_Signaling	0.348069139290473
HIF1__Signaling	Thrombopoietin_Signaling	0.34807033423335
Role_of_Osteoblasts,_Osteoclasts_and_Chondrocytes_in_Rheumatoid_Arthritis	Eicosanoid_Signaling	0.34807114303748
Intrinsic_Prothrombin_Activation_Pathway	TWEAK_Signaling	0.348073913843888
P2Y_Purigenic_Receptor_Signaling_Pathway	Thrombopoietin_Signaling	0.348074649594742
HIF1__Signaling	Eicosanoid_Signaling	0.348077493454426
Putrescine_Degradation_III	VDR/RXR_Activation	0.348078156152004
cAMP-mediated_signaling	Cell_Cycle_Control_of_Chromosomal_Replication	0.348081662709266
Glycine_Betaine_Degradation	cAMP-mediated_signaling	0.348085169266528
Ethanol_Degradation_IV	Antigen_Presentation_Pathway	0.348088174887039
Ethanol_Degradation_IV	Glioma_Invasiveness_Signaling	0.348088174887039
Ethanol_Degradation_IV	Prolactin_Signaling	0.348098694558825
HIF1__Signaling	Agranulocyte_Adhesion_and_Diapedesis	0.348102550728195
HIF1__Signaling	RAR_Activation	0.348102550728195
HIF1__Signaling	LPS/IL-1_Mediated_Inhibition_of_RXR_Function	0.348102550728195
HIF1__Signaling	Oncostatin_M_Signaling	0.348102550728195
HIF1__Signaling	Tryptophan_Degradation_to_2-amino-3-carboxymuconate_Semialdehyde	0.348102550728195
Assembly_of_RNA_Polymerase_II_Complex	Endothelin-1_Signaling	0.348102702052839
Assembly_of_RNA_Polymerase_II_Complex	Gap_Junction_Signaling	0.348102702052839
Assembly_of_RNA_Polymerase_II_Complex	Synaptic_Long_Term_Depression	0.348102702052839
Assembly_of_RNA_Polymerase_II_Complex	Dendritic_Cell_Maturation	0.348102702052839
Assembly_of_RNA_Polymerase_II_Complex	Leukocyte_Extravasation_Signaling	0.348102702052839
cAMP-mediated_signaling	Role_of_Tissue_Factor_in_Cancer	0.348102702052839
Assembly_of_RNA_Polymerase_II_Complex	Eicosanoid_Signaling	0.348106208610101
Assembly_of_RNA_Polymerase_II_Complex	Thrombopoietin_Signaling	0.348106208610101
Protein_Ubiquitination_Pathway	Role_of_CHK_Proteins_in_Cell_Cycle_Checkpoint_Control	0.348107664457536
Fatty_Acid__-oxidation	IL-8_Signaling	0.348108212357108
Fatty_Acid__-oxidation	Cardiac_Hypertrophy_Signaling	0.348108212357108
Fatty_Acid__-oxidation	CDK5_Signaling	0.348108212357108
Axonal_Guidance_Signaling	Role_of_IL-17A_in_Psoriasis	0.348109198576338
Axonal_Guidance_Signaling	tRNA_Splicing	0.348109198576338
P2Y_Purigenic_Receptor_Signaling_Pathway	Endothelin-1_Signaling	0.348109715167363
P2Y_Purigenic_Receptor_Signaling_Pathway	Gap_Junction_Signaling	0.348109715167363
P2Y_Purigenic_Receptor_Signaling_Pathway	Synaptic_Long_Term_Depression	0.348109715167363
P2Y_Purigenic_Receptor_Signaling_Pathway	Dendritic_Cell_Maturation	0.348109715167363
P2Y_Purigenic_Receptor_Signaling_Pathway	Leukocyte_Extravasation_Signaling	0.348109715167363
P2Y_Purigenic_Receptor_Signaling_Pathway	Eicosanoid_Signaling	0.348113221724625
Putrescine_Degradation_III	Glioblastoma_Multiforme_Signaling	0.348113221724625
Protein_Ubiquitination_Pathway	Glycogen_Degradation_II	0.348118403289151
P2Y_Purigenic_Receptor_Signaling_Pathway	Agranulocyte_Adhesion_and_Diapedesis	0.348120234839149
P2Y_Purigenic_Receptor_Signaling_Pathway	RAR_Activation	0.348120234839149
P2Y_Purigenic_Receptor_Signaling_Pathway	LPS/IL-1_Mediated_Inhibition_of_RXR_Function	0.348120234839149
P2Y_Purigenic_Receptor_Signaling_Pathway	Oncostatin_M_Signaling	0.348120234839149
P2Y_Purigenic_Receptor_Signaling_Pathway	Tryptophan_Degradation_to_2-amino-3-carboxymuconate_Semialdehyde	0.348120234839149
tRNA_Charging	Salvage_Pathways_of_Pyrimidine_Deoxyribonucleotides	0.348120567375887
Human_Embryonic_Stem_Cell_Pluripotency	Macropinocytosis_Signaling	0.348121737649404
HIF1__Signaling	Endothelin-1_Signaling	0.348127608001964
HIF1__Signaling	Gap_Junction_Signaling	0.348127608001964
HIF1__Signaling	Synaptic_Long_Term_Depression	0.348127608001964
HIF1__Signaling	Dendritic_Cell_Maturation	0.348127608001964
HIF1__Signaling	Leukocyte_Extravasation_Signaling	0.348127608001964
Ethanol_Degradation_IV	Cell_Cycle_Control_of_Chromosomal_Replication	0.348130253574184
Coagulation_System	Epithelial_Adherens_Junction_Signaling	0.348131765584173
Bladder_Cancer_Signaling	Actin_Cytoskeleton_Signaling	0.348134261068198
Bladder_Cancer_Signaling	Integrin_Signaling	0.348134261068198
Bladder_Cancer_Signaling	CREB_Signaling_in_Neurons	0.348134261068198
Tryptophan_Degradation_X_(Mammalian,_via_Tryptamine)	Cardiac__-adrenergic_Signaling	0.348134762004949
Role_of_Macrophages,_Fibroblasts_and_Endothelial_Cells_in_Rheumatoid_Arthritis	tRNA_Charging	0.348137744486059
TR/RXR_Activation	IL-8_Signaling	0.34813776762546
TR/RXR_Activation	Cardiac_Hypertrophy_Signaling	0.34813776762546
TR/RXR_Activation	CDK5_Signaling	0.34813776762546
cAMP-mediated_signaling	VDR/RXR_Activation	0.34813776762546
Role_of_Osteoblasts,_Osteoclasts_and_Chondrocytes_in_Rheumatoid_Arthritis	Ovarian_Cancer_Signaling	0.348141274182722
TR/RXR_Activation	Induction_of_Apoptosis_by_HIV1	0.348144780739984
Cellular_Effects_of_Sildenafil_(Viagra)	Estrogen_Receptor_Signaling	0.348148235171261
Assembly_of_RNA_Polymerase_II_Complex	Agranulocyte_Adhesion_and_Diapedesis	0.348148287297246
Assembly_of_RNA_Polymerase_II_Complex	RAR_Activation	0.348148287297246
Assembly_of_RNA_Polymerase_II_Complex	LPS/IL-1_Mediated_Inhibition_of_RXR_Function	0.348148287297246
Assembly_of_RNA_Polymerase_II_Complex	Oncostatin_M_Signaling	0.348148287297246
Assembly_of_RNA_Polymerase_II_Complex	Tryptophan_Degradation_to_2-amino-3-carboxymuconate_Semialdehyde	0.348148287297246
Intrinsic_Prothrombin_Activation_Pathway	Actin_Cytoskeleton_Signaling	0.348152665275732
Intrinsic_Prothrombin_Activation_Pathway	Integrin_Signaling	0.348152665275732
Intrinsic_Prothrombin_Activation_Pathway	CREB_Signaling_in_Neurons	0.348152665275732
Putrescine_Degradation_III	Glycine_Betaine_Degradation	0.34815530041177
Bladder_Cancer_Signaling	Role_of_JAK2_in_Hormone-like_Cytokine_Signaling	0.34815530041177
Dopamine_Degradation	cAMP-mediated_signaling	0.348158806969032
Thrombin_Signaling	Leptin_Signaling_in_Obesity	0.348160810716039
Retinoate_Biosynthesis_I	Bladder_Cancer_Signaling	0.348164421470342
Role_of_Macrophages,_Fibroblasts_and_Endothelial_Cells_in_Rheumatoid_Arthritis	Colorectal_Cancer_Metastasis_Signaling	0.348164752109352
Ethanol_Degradation_IV	Role_of_Tissue_Factor_in_Cancer	0.348168825704067
Putrescine_Degradation_III	Inhibition_of_Matrix_Metalloproteases	0.348169326640818
Putrescine_Degradation_III	Cell_Cycle_Control_of_Chromosomal_Replication	0.348169326640818
Colorectal_Cancer_Metastasis_Signaling	EIF2_Signaling	0.348169326640818
Role_of_Macrophages,_Fibroblasts_and_Endothelial_Cells_in_Rheumatoid_Arthritis	Epithelial_Adherens_Junction_Signaling	0.348172543912376
Putrescine_Degradation_III	Basal_Cell_Carcinoma_Signaling	0.34817283319808
CXCR4_Signaling	Role_of_IL-17A_in_Psoriasis	0.348174158801258
CXCR4_Signaling	tRNA_Splicing	0.348174158801258
Salvage_Pathways_of_Pyrimidine_Deoxyribonucleotides	Cell_Cycle_Control_of_Chromosomal_Replication	0.348176339755342
Calcium_Signaling	Extrinsic_Prothrombin_Activation_Pathway	0.348177842565598
Calcium_Signaling	IL-8_Signaling	0.348179846312605
Calcium_Signaling	Cardiac_Hypertrophy_Signaling	0.348179846312605
Calcium_Signaling	CDK5_Signaling	0.348179846312605
Tryptophan_Degradation_X_(Mammalian,_via_Tryptamine)	Extrinsic_Prothrombin_Activation_Pathway	0.348186859427129
Acute_Phase_Response_Signaling	Atherosclerosis_Signaling	0.348190365984391
Acute_Phase_Response_Signaling	Role_of_IL-17A_in_Psoriasis	0.348190365984391
Acute_Phase_Response_Signaling	tRNA_Splicing	0.348190365984391
P2Y_Purigenic_Receptor_Signaling_Pathway	Ovarian_Cancer_Signaling	0.348190365984391
Putrescine_Degradation_III	Histamine_Degradation	0.348193872541653
Putrescine_Degradation_III	Noradrenaline_and_Adrenaline_Degradation	0.348193872541653
Intrinsic_Prothrombin_Activation_Pathway	Role_of_JAK2_in_Hormone-like_Cytokine_Signaling	0.348195620602193
Salvage_Pathways_of_Pyrimidine_Deoxyribonucleotides	Antigen_Presentation_Pathway	0.348197379098915
Salvage_Pathways_of_Pyrimidine_Deoxyribonucleotides	Glioma_Invasiveness_Signaling	0.348197379098915
Glioblastoma_Multiforme_Signaling	cAMP-mediated_signaling	0.348200885656177
Ethanol_Degradation_IV	VDR/RXR_Activation	0.348203891276687
Ethanol_Degradation_IV	Dopamine_Degradation	0.348207397833949
Salvage_Pathways_of_Pyrimidine_Deoxyribonucleotides	Prolactin_Signaling	0.348207898770701
Assembly_of_RNA_Polymerase_II_Complex	Ovarian_Cancer_Signaling	0.348218418442487
Fatty_Acid__-oxidation	Extrinsic_Prothrombin_Activation_Pathway	0.348218418442487
TR/RXR_Activation	Extrinsic_Prothrombin_Activation_Pathway	0.348219921252743
Regulation_of_the_Epithelial-Mesenchymal_Transition_Pathway	Leptin_Signaling_in_Obesity	0.348230941861281
Calcium_Signaling	Role_of_CHK_Proteins_in_Cell_Cycle_Checkpoint_Control	0.348251480268101
Coagulation_System	Colorectal_Cancer_Metastasis_Signaling	0.348254945875327
Inhibition_of_Matrix_Metalloproteases	cAMP-mediated_signaling	0.34825699057237
Bladder_Cancer_Signaling	Hepatic_Fibrosis_/_Hepatic_Stellate_Cell_Activation	0.348260497129632
Bladder_Cancer_Signaling	Sperm_Motility	0.348260497129632
Bladder_Cancer_Signaling	ILK_Signaling	0.348260497129632
Glycine_Betaine_Degradation	Salvage_Pathways_of_Pyrimidine_Deoxyribonucleotides	0.348260497129632
Fatty_Acid__-oxidation	GDNF_Family_Ligand-Receptor_Interactions	0.348264003686894
Glioblastoma_Multiforme_Signaling	Ethanol_Degradation_IV	0.348267009307405
Cellular_Effects_of_Sildenafil_(Viagra)	Caveolar-mediated_Endocytosis_Signaling	0.348275906152839
Cellular_Effects_of_Sildenafil_(Viagra)	Regulation_of_eIF4_and_p70S6K_Signaling	0.348275906152839
Growth_Hormone_Signaling	Breast_Cancer_Regulation_by_Stathmin1	0.348276898417151
Axonal_Guidance_Signaling	Macropinocytosis_Signaling	0.348277440271641
Growth_Hormone_Signaling	Oxidative_Ethanol_Degradation_III	0.348279681203945
Salvage_Pathways_of_Pyrimidine_Deoxyribonucleotides	Dopamine_Degradation	0.348281536473205
Calcium_Signaling	Glycogen_Degradation_II	0.34828303928346
Tryptophan_Degradation_X_(Mammalian,_via_Tryptamine)	Role_of_IL-17A_in_Psoriasis	0.348290553334736
Tryptophan_Degradation_X_(Mammalian,_via_Tryptamine)	tRNA_Splicing	0.348290553334736
Tryptophan_Degradation_X_(Mammalian,_via_Tryptamine)	Glycogen_Degradation_II	0.348292056144991
Salvage_Pathways_of_Pyrimidine_Deoxyribonucleotides	Role_of_Tissue_Factor_in_Cancer	0.348295562702253
Basal_Cell_Carcinoma_Signaling	cAMP-mediated_signaling	0.348295562702253
Coagulation_System	Calcium_Signaling	0.348296005972378
HIF1__Signaling	Retinoate_Biosynthesis_I	0.348297072468405
Protein_Ubiquitination_Pathway	Role_of_IL-17A_in_Psoriasis	0.348297383816069
Protein_Ubiquitination_Pathway	tRNA_Splicing	0.348297383816069
Histamine_Degradation	cAMP-mediated_signaling	0.348299069259515
cAMP-mediated_signaling	Noradrenaline_and_Adrenaline_Degradation	0.348299069259515
Bladder_Cancer_Signaling	G_Beta_Gamma_Signaling	0.34830057206977
Factors_Promoting_Cardiogenesis_in_Vertebrates	Intrinsic_Prothrombin_Activation_Pathway	0.348312708855472
Epithelial_Adherens_Junction_Signaling	EIF2_Signaling	0.348313095488564
Salvage_Pathways_of_Pyrimidine_Deoxyribonucleotides	VDR/RXR_Activation	0.348313095488564
Retinoate_Biosynthesis_I	Role_of_Osteoblasts,_Osteoclasts_and_Chondrocytes_in_Rheumatoid_Arthritis	0.348314275271512
TR/RXR_Activation	Role_of_CHK_Proteins_in_Cell_Cycle_Checkpoint_Control	0.348314598298819
Coagulation_System	EIF2_Signaling	0.348314669652856
Bladder_Cancer_Signaling	Induction_of_Apoptosis_by_HIV1	0.348316602045826
tRNA_Charging	Leptin_Signaling_in_Obesity	0.34831680264491
Fatty_Acid__-oxidation	Role_of_CHK_Proteins_in_Cell_Cycle_Checkpoint_Control	0.348320108603088
Ethanol_Degradation_IV	Inhibition_of_Matrix_Metalloproteases	0.348323114223598
Role_of_Osteoblasts,_Osteoclasts_and_Chondrocytes_in_Rheumatoid_Arthritis	Role_of_JAK2_in_Hormone-like_Cytokine_Signaling	0.34832361516035
Fatty_Acid__-oxidation	Glycogen_Degradation_II	0.34832361516035
TR/RXR_Activation	Glycogen_Degradation_II	0.348325117970605
Ethanol_Degradation_IV	Basal_Cell_Carcinoma_Signaling	0.34832662078086
Intrinsic_Prothrombin_Activation_Pathway	G_Beta_Gamma_Signaling	0.348333179921453
Thrombin_Signaling	Nitric_Oxide_Signaling_in_the_Cardiovascular_System	0.348334134832136
Putrescine_Degradation_III	Relaxin_Signaling	0.348335225413189
Glycine_Betaine_Degradation	Ethanol_Degradation_IV	0.348337140452646
HIF1__Signaling	Role_of_JAK2_in_Hormone-like_Cytokine_Signaling	0.348345964244804
Intrinsic_Prothrombin_Activation_Pathway	Induction_of_Apoptosis_by_HIV1	0.348345964244804
Ethanol_Degradation_IV	Histamine_Degradation	0.348347660124433
Ethanol_Degradation_IV	Noradrenaline_and_Adrenaline_Degradation	0.348347660124433
P2Y_Purigenic_Receptor_Signaling_Pathway	Role_of_JAK2_in_Hormone-like_Cytokine_Signaling	0.348348161061184
Bladder_Cancer_Signaling	Ovarian_Cancer_Signaling	0.348348161061184
Bladder_Cancer_Signaling	GDNF_Family_Ligand-Receptor_Interactions	0.348348161061184
Putrescine_Degradation_III	Atherosclerosis_Signaling	0.348351667618446
Bladder_Cancer_Signaling	RhoGDI_Signaling	0.348355174175709
Epithelial_Adherens_Junction_Signaling	Thrombin_Signaling	0.348358680732971
Epithelial_Adherens_Junction_Signaling	Regulation_of_the_Epithelial-Mesenchymal_Transition_Pathway	0.348358680732971
Human_Embryonic_Stem_Cell_Pluripotency	Thyroid_Cancer_Signaling	0.348360183543226
P2Y_Purigenic_Receptor_Signaling_Pathway	Actin_Cytoskeleton_Signaling	0.348362187290233
P2Y_Purigenic_Receptor_Signaling_Pathway	Integrin_Signaling	0.348362187290233
P2Y_Purigenic_Receptor_Signaling_Pathway	CREB_Signaling_in_Neurons	0.348362187290233
Leptin_Signaling_in_Obesity	Antigen_Presentation_Pathway	0.348371204151764
Leptin_Signaling_in_Obesity	Glioma_Invasiveness_Signaling	0.348371204151764
Assembly_of_RNA_Polymerase_II_Complex	Role_of_JAK2_in_Hormone-like_Cytokine_Signaling	0.348376213519281
Calcium_Signaling	Cardiac__-adrenergic_Signaling	0.348376213519281
Intrinsic_Prothrombin_Activation_Pathway	GDNF_Family_Ligand-Receptor_Interactions	0.348381760350188
Role_of_Osteoblasts,_Osteoclasts_and_Chondrocytes_in_Rheumatoid_Arthritis	Actin_Cytoskeleton_Signaling	0.348383226633805
Role_of_Osteoblasts,_Osteoclasts_and_Chondrocytes_in_Rheumatoid_Arthritis	Integrin_Signaling	0.348383226633805
Role_of_Osteoblasts,_Osteoclasts_and_Chondrocytes_in_Rheumatoid_Arthritis	CREB_Signaling_in_Neurons	0.348383226633805
Intrinsic_Prothrombin_Activation_Pathway	RhoGDI_Signaling	0.348388919571265
Glioblastoma_Multiforme_Signaling	Salvage_Pathways_of_Pyrimidine_Deoxyribonucleotides	0.348393746305591
Role_of_Osteoblasts,_Osteoclasts_and_Chondrocytes_in_Rheumatoid_Arthritis	Hepatic_Fibrosis_/_Hepatic_Stellate_Cell_Activation	0.348393746305591
Role_of_Osteoblasts,_Osteoclasts_and_Chondrocytes_in_Rheumatoid_Arthritis	Sperm_Motility	0.348393746305591
Role_of_Osteoblasts,_Osteoclasts_and_Chondrocytes_in_Rheumatoid_Arthritis	ILK_Signaling	0.348393746305591
Glycine_Betaine_Degradation	Leptin_Signaling_in_Obesity	0.34839925660986
tRNA_Charging	Epithelial_Adherens_Junction_Signaling	0.348404255319149
Regulation_of_the_Epithelial-Mesenchymal_Transition_Pathway	Nitric_Oxide_Signaling_in_the_Cardiovascular_System	0.348404265977378
Cell_Cycle_Control_of_Chromosomal_Replication	Leptin_Signaling_in_Obesity	0.348413282838909
Acute_Phase_Response_Signaling	Macropinocytosis_Signaling	0.348414785649164
tRNA_Charging	Nitric_Oxide_Signaling_in_the_Cardiovascular_System	0.348415453527436
HIF1__Signaling	Factors_Promoting_Cardiogenesis_in_Vertebrates	0.348418703007519
CXCR4_Signaling	Macropinocytosis_Signaling	0.348420519383565
Salvage_Pathways_of_Pyrimidine_Deoxyribonucleotides	Histamine_Degradation	0.348421798763688
Salvage_Pathways_of_Pyrimidine_Deoxyribonucleotides	Noradrenaline_and_Adrenaline_Degradation	0.348421798763688
Putrescine_Degradation_III	Wnt/_-catenin_Signaling	0.34842530532095
Fatty_Acid__-oxidation	Cardiac__-adrenergic_Signaling	0.348427309067957
Factors_Promoting_Cardiogenesis_in_Vertebrates	Role_of_Osteoblasts,_Osteoclasts_and_Chondrocytes_in_Rheumatoid_Arthritis	0.348429829405989
Intrinsic_Prothrombin_Activation_Pathway	Hepatic_Fibrosis_/_Hepatic_Stellate_Cell_Activation	0.348431874897725
Intrinsic_Prothrombin_Activation_Pathway	Sperm_Motility	0.348431874897725
Intrinsic_Prothrombin_Activation_Pathway	ILK_Signaling	0.348431874897725
Putrescine_Degradation_III	G_s_Signaling	0.348433821245729
HIF1__Signaling	Actin_Cytoskeleton_Signaling	0.348442613729341
HIF1__Signaling	Integrin_Signaling	0.348442613729341
HIF1__Signaling	CREB_Signaling_in_Neurons	0.348442613729341
Assembly_of_RNA_Polymerase_II_Complex	Actin_Cytoskeleton_Signaling	0.348442838107261
Assembly_of_RNA_Polymerase_II_Complex	Integrin_Signaling	0.348442838107261
Assembly_of_RNA_Polymerase_II_Complex	CREB_Signaling_in_Neurons	0.348442838107261
Inhibition_of_Matrix_Metalloproteases	Salvage_Pathways_of_Pyrimidine_Deoxyribonucleotides	0.348449851221785
Leptin_Signaling_in_Obesity	Role_of_Tissue_Factor_in_Cancer	0.348451854968792
Intrinsic_Prothrombin_Activation_Pathway	IL-8_Signaling	0.348453352560956
Intrinsic_Prothrombin_Activation_Pathway	Cardiac_Hypertrophy_Signaling	0.348453352560956
Intrinsic_Prothrombin_Activation_Pathway	CDK5_Signaling	0.348453352560956
Role_of_Osteoblasts,_Osteoclasts_and_Chondrocytes_in_Rheumatoid_Arthritis	G_Beta_Gamma_Signaling	0.348454860589302
Atherosclerosis_Signaling	cAMP-mediated_signaling	0.348456864336309
Bladder_Cancer_Signaling	IL-8_Signaling	0.348456864336309
Bladder_Cancer_Signaling	Cardiac_Hypertrophy_Signaling	0.348456864336309
Bladder_Cancer_Signaling	CDK5_Signaling	0.348456864336309
Putrescine_Degradation_III	TWEAK_Signaling	0.348463877450833
Role_of_Osteoblasts,_Osteoclasts_and_Chondrocytes_in_Rheumatoid_Arthritis	Induction_of_Apoptosis_by_HIV1	0.348467384008095
Retinoate_Biosynthesis_I	P2Y_Purigenic_Receptor_Signaling_Pathway	0.348467784043442
Salvage_Pathways_of_Pyrimidine_Deoxyribonucleotides	Basal_Cell_Carcinoma_Signaling	0.348470890565357
Colorectal_Cancer_Metastasis_Signaling	Thrombin_Signaling	0.348474397122619
Colorectal_Cancer_Metastasis_Signaling	Regulation_of_the_Epithelial-Mesenchymal_Transition_Pathway	0.348474397122619
cAMP-mediated_signaling	DNA_damage-induced_14-3-3__Signaling	0.348477903679881
Protein_Ubiquitination_Pathway	Cardiac__-adrenergic_Signaling	0.348478409834724
HIF1__Signaling	G_Beta_Gamma_Signaling	0.348483523564065
Tryptophan_Degradation_X_(Mammalian,_via_Tryptamine)	Macropinocytosis_Signaling	0.348486920541412
Leptin_Signaling_in_Obesity	VDR/RXR_Activation	0.348486920541412
P2Y_Purigenic_Receptor_Signaling_Pathway	Hepatic_Fibrosis_/_Hepatic_Stellate_Cell_Activation	0.348488423351668
P2Y_Purigenic_Receptor_Signaling_Pathway	Sperm_Motility	0.348488423351668
P2Y_Purigenic_Receptor_Signaling_Pathway	ILK_Signaling	0.348488423351668
Role_of_Osteoblasts,_Osteoclasts_and_Chondrocytes_in_Rheumatoid_Arthritis	TWEAK_Signaling	0.348488423351668
Role_of_Osteoblasts,_Osteoclasts_and_Chondrocytes_in_Rheumatoid_Arthritis	RhoGDI_Signaling	0.348488423351668
HIF1__Signaling	Induction_of_Apoptosis_by_HIV1	0.348489148666339
TR/RXR_Activation	Cardiac__-adrenergic_Signaling	0.34849192990893
Relaxin_Signaling	Ethanol_Degradation_IV	0.348492216903944
Calcium_Signaling	Role_of_IL-17A_in_Psoriasis	0.348496939276447
Calcium_Signaling	tRNA_Splicing	0.348496939276447
Assembly_of_RNA_Polymerase_II_Complex	Hepatic_Fibrosis_/_Hepatic_Stellate_Cell_Activation	0.348498943023454
Assembly_of_RNA_Polymerase_II_Complex	Sperm_Motility	0.348498943023454
Assembly_of_RNA_Polymerase_II_Complex	ILK_Signaling	0.348498943023454
Role_of_Osteoblasts,_Osteoclasts_and_Chondrocytes_in_Rheumatoid_Arthritis	GDNF_Family_Ligand-Receptor_Interactions	0.348502449580716
Atherosclerosis_Signaling	Ethanol_Degradation_IV	0.348505455201226
Putrescine_Degradation_III	Ethanol_Degradation_II	0.348505956137978
Putrescine_Degradation_III	Thrombopoietin_Signaling	0.348505956137978
Protein_Ubiquitination_Pathway	Macropinocytosis_Signaling	0.34851574005891
Factors_Promoting_Cardiogenesis_in_Vertebrates	Assembly_of_RNA_Polymerase_II_Complex	0.348519319669449
Assembly_of_RNA_Polymerase_II_Complex	G_Beta_Gamma_Signaling	0.348521485177281
Fatty_Acid__-oxidation	Role_of_IL-17A_in_Psoriasis	0.34852699548155
Fatty_Acid__-oxidation	tRNA_Splicing	0.34852699548155
Putrescine_Degradation_III	Endothelin-1_Signaling	0.348530502038813
Putrescine_Degradation_III	Gap_Junction_Signaling	0.348530502038813
Putrescine_Degradation_III	Synaptic_Long_Term_Depression	0.348530502038813
Putrescine_Degradation_III	Dendritic_Cell_Maturation	0.348530502038813
Putrescine_Degradation_III	Leukocyte_Extravasation_Signaling	0.348530502038813
cAMP-mediated_signaling	G_s_Signaling	0.348532004849068
Dopamine_Degradation	Leptin_Signaling_in_Obesity	0.348536012343082
HIF1__Signaling	RhoGDI_Signaling	0.348539263213877
P2Y_Purigenic_Receptor_Signaling_Pathway	GDNF_Family_Ligand-Receptor_Interactions	0.348541021710599
Ethanol_Degradation_IV	DNA_damage-induced_14-3-3__Signaling	0.348544027331109
P2Y_Purigenic_Receptor_Signaling_Pathway	Induction_of_Apoptosis_by_HIV1	0.348544528267861
Epithelial_Adherens_Junction_Signaling	Prolactin_Signaling	0.348544528267861
P2Y_Purigenic_Receptor_Signaling_Pathway	G_Beta_Gamma_Signaling	0.348546031078116
P2Y_Purigenic_Receptor_Signaling_Pathway	RhoGDI_Signaling	0.348548034825123
Putrescine_Degradation_III	Agranulocyte_Adhesion_and_Diapedesis	0.348548034825123
Putrescine_Degradation_III	RAR_Activation	0.348548034825123
Putrescine_Degradation_III	LPS/IL-1_Mediated_Inhibition_of_RXR_Function	0.348548034825123
Putrescine_Degradation_III	Oncostatin_M_Signaling	0.348548034825123
Putrescine_Degradation_III	Tryptophan_Degradation_to_2-amino-3-carboxymuconate_Semialdehyde	0.348548034825123
Thrombin_Signaling	EIF2_Signaling	0.348548034825123
EIF2_Signaling	Regulation_of_the_Epithelial-Mesenchymal_Transition_Pathway	0.348548034825123
TR/RXR_Activation	Role_of_IL-17A_in_Psoriasis	0.348549537635378
TR/RXR_Activation	tRNA_Splicing	0.348549537635378
Epithelial_Adherens_Junction_Signaling	Antigen_Presentation_Pathway	0.348551541382385
Epithelial_Adherens_Junction_Signaling	Glioma_Invasiveness_Signaling	0.348551541382385
cAMP-mediated_signaling	TWEAK_Signaling	0.348551541382385
Assembly_of_RNA_Polymerase_II_Complex	Induction_of_Apoptosis_by_HIV1	0.348555047939647
Nitric_Oxide_Signaling_in_the_Cardiovascular_System	Prolactin_Signaling	0.348555047939647
Bladder_Cancer_Signaling	Extrinsic_Prothrombin_Activation_Pathway	0.348556550749902
Putrescine_Degradation_III	Eicosanoid_Signaling	0.348558554496909
cAMP-mediated_signaling	Ethanol_Degradation_II	0.348558554496909
Axonal_Guidance_Signaling	Thyroid_Cancer_Signaling	0.348560229504173
HIF1__Signaling	Hepatic_Fibrosis_/_Hepatic_Stellate_Cell_Activation	0.348560740877107
HIF1__Signaling	Sperm_Motility	0.348560740877107
HIF1__Signaling	ILK_Signaling	0.348560740877107
Role_of_Osteoblasts,_Osteoclasts_and_Chondrocytes_in_Rheumatoid_Arthritis	IL-8_Signaling	0.348562061054171
Role_of_Osteoblasts,_Osteoclasts_and_Chondrocytes_in_Rheumatoid_Arthritis	Cardiac_Hypertrophy_Signaling	0.348562061054171
Role_of_Osteoblasts,_Osteoclasts_and_Chondrocytes_in_Rheumatoid_Arthritis	CDK5_Signaling	0.348562061054171
Glycine_Betaine_Degradation	Epithelial_Adherens_Junction_Signaling	0.348562061054171
Glioblastoma_Multiforme_Signaling	Leptin_Signaling_in_Obesity	0.34856757135844
Assembly_of_RNA_Polymerase_II_Complex	GDNF_Family_Ligand-Receptor_Interactions	0.348569074168695
Ethanol_Degradation_IV	G_s_Signaling	0.348570076042199
Glycine_Betaine_Degradation	Nitric_Oxide_Signaling_in_the_Cardiovascular_System	0.348572580725958
Assembly_of_RNA_Polymerase_II_Complex	RhoGDI_Signaling	0.34857608728322
Epithelial_Adherens_Junction_Signaling	Cell_Cycle_Control_of_Chromosomal_Replication	0.34857608728322
Coagulation_System	Regulation_of_the_Epithelial-Mesenchymal_Transition_Pathway	0.348583426651736
Human_Embryonic_Stem_Cell_Pluripotency	Estrogen_Receptor_Signaling	0.348583752659139
Role_of_Macrophages,_Fibroblasts_and_Endothelial_Cells_in_Rheumatoid_Arthritis	Thrombin_Signaling	0.348585509472606
Nitric_Oxide_Signaling_in_the_Cardiovascular_System	Cell_Cycle_Control_of_Chromosomal_Replication	0.348586606955006
cAMP-mediated_signaling	Endothelin-1_Signaling	0.348590113512268
cAMP-mediated_signaling	Gap_Junction_Signaling	0.348590113512268
cAMP-mediated_signaling	Synaptic_Long_Term_Depression	0.348590113512268
cAMP-mediated_signaling	Dendritic_Cell_Maturation	0.348590113512268
cAMP-mediated_signaling	Leukocyte_Extravasation_Signaling	0.348590113512268
P2Y_Purigenic_Receptor_Signaling_Pathway	Factors_Promoting_Cardiogenesis_in_Vertebrates	0.348590911880216
cAMP-mediated_signaling	Wnt/_-catenin_Signaling	0.34859362006953
cAMP-mediated_signaling	Thrombopoietin_Signaling	0.34859362006953
Nitric_Oxide_Signaling_in_the_Cardiovascular_System	Antigen_Presentation_Pathway	0.348597126626792
Nitric_Oxide_Signaling_in_the_Cardiovascular_System	Glioma_Invasiveness_Signaling	0.348597126626792
Putrescine_Degradation_III	Ovarian_Cancer_Signaling	0.348600633184054
HIF1__Signaling	IL-8_Signaling	0.348603696203567
HIF1__Signaling	Cardiac_Hypertrophy_Signaling	0.348603696203567
HIF1__Signaling	CDK5_Signaling	0.348603696203567
Relaxin_Signaling	Salvage_Pathways_of_Pyrimidine_Deoxyribonucleotides	0.348603696203567
Human_Embryonic_Stem_Cell_Pluripotency	Caveolar-mediated_Endocytosis_Signaling	0.348605642551571
Human_Embryonic_Stem_Cell_Pluripotency	Regulation_of_eIF4_and_p70S6K_Signaling	0.348605642551571
tRNA_Charging	EIF2_Signaling	0.348605823068309
Inhibition_of_Matrix_Metalloproteases	Leptin_Signaling_in_Obesity	0.348606143488323
Basal_Cell_Carcinoma_Signaling	Leptin_Signaling_in_Obesity	0.348609650045585
cAMP-mediated_signaling	Eicosanoid_Signaling	0.34861115285584
Atherosclerosis_Signaling	Salvage_Pathways_of_Pyrimidine_Deoxyribonucleotides	0.348614659413102
Ethanol_Degradation_IV	TWEAK_Signaling	0.348617665033613
Bladder_Cancer_Signaling	Role_of_CHK_Proteins_in_Cell_Cycle_Checkpoint_Control	0.348623175337882
Epithelial_Adherens_Junction_Signaling	Role_of_Tissue_Factor_in_Cancer	0.348632192199413
Acute_Phase_Response_Signaling	Thyroid_Cancer_Signaling	0.348635698756675
Putrescine_Degradation_III	DNA_damage-induced_14-3-3__Signaling	0.348635698756675
Agranulocyte_Adhesion_and_Diapedesis	cAMP-mediated_signaling	0.348635698756675
cAMP-mediated_signaling	RAR_Activation	0.348635698756675
cAMP-mediated_signaling	LPS/IL-1_Mediated_Inhibition_of_RXR_Function	0.348635698756675
cAMP-mediated_signaling	Oncostatin_M_Signaling	0.348635698756675
cAMP-mediated_signaling	Tryptophan_Degradation_to_2-amino-3-carboxymuconate_Semialdehyde	0.348635698756675
Epithelial_Adherens_Junction_Signaling	Dopamine_Degradation	0.348653231542985
Ethanol_Degradation_IV	Endothelin-1_Signaling	0.348656237163496
Ethanol_Degradation_IV	Gap_Junction_Signaling	0.348656237163496
Ethanol_Degradation_IV	Synaptic_Long_Term_Depression	0.348656237163496
Ethanol_Degradation_IV	Dendritic_Cell_Maturation	0.348656237163496
Ethanol_Degradation_IV	Leukocyte_Extravasation_Signaling	0.348656237163496
Coagulation_System	Thrombin_Signaling	0.348658081373647
Intrinsic_Prothrombin_Activation_Pathway	Role_of_CHK_Proteins_in_Cell_Cycle_Checkpoint_Control	0.348658924480445
Ethanol_Degradation_IV	Thrombopoietin_Signaling	0.348659743720758
Bladder_Cancer_Signaling	Glycogen_Degradation_II	0.348661747467765
Factors_Promoting_Cardiogenesis_in_Vertebrates	TR/RXR_Activation	0.348662504090983
Nitric_Oxide_Signaling_in_the_Cardiovascular_System	Dopamine_Degradation	0.348663751214772
Assembly_of_RNA_Polymerase_II_Complex	IL-8_Signaling	0.348667257772034
Assembly_of_RNA_Polymerase_II_Complex	Cardiac_Hypertrophy_Signaling	0.348667257772034
Assembly_of_RNA_Polymerase_II_Complex	CDK5_Signaling	0.348667257772034
Colorectal_Cancer_Metastasis_Signaling	Antigen_Presentation_Pathway	0.348667257772034
Colorectal_Cancer_Metastasis_Signaling	Glioma_Invasiveness_Signaling	0.348667257772034
Epithelial_Adherens_Junction_Signaling	VDR/RXR_Activation	0.348667257772034
Role_of_Osteoblasts,_Osteoclasts_and_Chondrocytes_in_Rheumatoid_Arthritis	Extrinsic_Prothrombin_Activation_Pathway	0.348672267139551
Histamine_Degradation	Leptin_Signaling_in_Obesity	0.348676274633565
Leptin_Signaling_in_Obesity	Noradrenaline_and_Adrenaline_Degradation	0.348676274633565
Ethanol_Degradation_IV	Wnt/_-catenin_Signaling	0.348677276507068
Colorectal_Cancer_Metastasis_Signaling	Glycine_Betaine_Degradation	0.34867777744382
Nitric_Oxide_Signaling_in_the_Cardiovascular_System	Role_of_Tissue_Factor_in_Cancer	0.34867777744382
Salvage_Pathways_of_Pyrimidine_Deoxyribonucleotides	DNA_damage-induced_14-3-3__Signaling	0.348688297115606
Ovarian_Cancer_Signaling	cAMP-mediated_signaling	0.348688297115606
Salvage_Pathways_of_Pyrimidine_Deoxyribonucleotides	G_s_Signaling	0.348689799925861
Colorectal_Cancer_Metastasis_Signaling	Cell_Cycle_Control_of_Chromosomal_Replication	0.348691803672868
Colorectal_Cancer_Metastasis_Signaling	Prolactin_Signaling	0.34869531023013
Ethanol_Degradation_IV	Agranulocyte_Adhesion_and_Diapedesis	0.348701822407903
Ethanol_Degradation_IV	RAR_Activation	0.348701822407903
Ethanol_Degradation_IV	LPS/IL-1_Mediated_Inhibition_of_RXR_Function	0.348701822407903
Ethanol_Degradation_IV	Oncostatin_M_Signaling	0.348701822407903
Ethanol_Degradation_IV	Tryptophan_Degradation_to_2-amino-3-carboxymuconate_Semialdehyde	0.348701822407903
Salvage_Pathways_of_Pyrimidine_Deoxyribonucleotides	Wnt/_-catenin_Signaling	0.348705829901917
Tryptophan_Degradation_X_(Mammalian,_via_Tryptamine)	Thyroid_Cancer_Signaling	0.348707833648923
Ethanol_Degradation_IV	Eicosanoid_Signaling	0.348712342079689
Glioblastoma_Multiforme_Signaling	Epithelial_Adherens_Junction_Signaling	0.348712843016441
Nitric_Oxide_Signaling_in_the_Cardiovascular_System	VDR/RXR_Activation	0.348712843016441
EIF2_Signaling	Prolactin_Signaling	0.348716349573703
P2Y_Purigenic_Receptor_Signaling_Pathway	IL-8_Signaling	0.348726869245489
P2Y_Purigenic_Receptor_Signaling_Pathway	Cardiac_Hypertrophy_Signaling	0.348726869245489
P2Y_Purigenic_Receptor_Signaling_Pathway	CDK5_Signaling	0.348726869245489
tRNA_Charging	Coagulation_System	0.348730177689805
Calcium_Signaling	Macropinocytosis_Signaling	0.348731878613006
Colorectal_Cancer_Metastasis_Signaling	Dopamine_Degradation	0.348733882360013
Glycine_Betaine_Degradation	EIF2_Signaling	0.348733882360013
Salvage_Pathways_of_Pyrimidine_Deoxyribonucleotides	Ethanol_Degradation_II	0.348733882360013
Glioblastoma_Multiforme_Signaling	Nitric_Oxide_Signaling_in_the_Cardiovascular_System	0.348740895474537
EIF2_Signaling	Antigen_Presentation_Pathway	0.348740895474537
EIF2_Signaling	Glioma_Invasiveness_Signaling	0.348740895474537
HIF1__Signaling	Extrinsic_Prothrombin_Activation_Pathway	0.348744835133366
Coagulation_System	Glycine_Betaine_Degradation	0.34874766703994
Colorectal_Cancer_Metastasis_Signaling	Role_of_Tissue_Factor_in_Cancer	0.348747908589062
Bladder_Cancer_Signaling	Cardiac__-adrenergic_Signaling	0.348747908589062
P2Y_Purigenic_Receptor_Signaling_Pathway	Extrinsic_Prothrombin_Activation_Pathway	0.348749411399317
Salvage_Pathways_of_Pyrimidine_Deoxyribonucleotides	Thrombopoietin_Signaling	0.348751415146324
Protein_Ubiquitination_Pathway	Thyroid_Cancer_Signaling	0.348751994354443
Axonal_Guidance_Signaling	Caveolar-mediated_Endocytosis_Signaling	0.348753528473245
Axonal_Guidance_Signaling	Regulation_of_eIF4_and_p70S6K_Signaling	0.348753528473245
Ethanol_Degradation_IV	Ovarian_Cancer_Signaling	0.348754420766834
Putrescine_Degradation_III	Actin_Cytoskeleton_Signaling	0.348754921703586
Putrescine_Degradation_III	Integrin_Signaling	0.348754921703586
Putrescine_Degradation_III	CREB_Signaling_in_Neurons	0.348754921703586
Cellular_Effects_of_Sildenafil_(Viagra)	Oxidative_Ethanol_Degradation_III	0.348755829651448
Growth_Hormone_Signaling	Factors_Promoting_Cardiogenesis_in_Vertebrates	0.348756613756614
Cellular_Effects_of_Sildenafil_(Viagra)	Breast_Cancer_Regulation_by_Stathmin1	0.348761454753723
Salvage_Pathways_of_Pyrimidine_Deoxyribonucleotides	Endothelin-1_Signaling	0.348765441375372
Salvage_Pathways_of_Pyrimidine_Deoxyribonucleotides	Gap_Junction_Signaling	0.348765441375372
Salvage_Pathways_of_Pyrimidine_Deoxyribonucleotides	Synaptic_Long_Term_Depression	0.348765441375372
Salvage_Pathways_of_Pyrimidine_Deoxyribonucleotides	Dendritic_Cell_Maturation	0.348765441375372
Salvage_Pathways_of_Pyrimidine_Deoxyribonucleotides	Leukocyte_Extravasation_Signaling	0.348765441375372
EIF2_Signaling	Cell_Cycle_Control_of_Chromosomal_Replication	0.348765441375372
Fatty_Acid__-oxidation	Macropinocytosis_Signaling	0.348768947932634
Epithelial_Adherens_Junction_Signaling	Basal_Cell_Carcinoma_Signaling	0.348772454489896
Role_of_Osteoblasts,_Osteoclasts_and_Chondrocytes_in_Rheumatoid_Arthritis	Role_of_CHK_Proteins_in_Cell_Cycle_Checkpoint_Control	0.348773957300151
Putrescine_Degradation_III	Ethanol_Degradation_IV	0.348776540255277
Assembly_of_RNA_Polymerase_II_Complex	Extrinsic_Prothrombin_Activation_Pathway	0.348777463857413
Role_of_Osteoblasts,_Osteoclasts_and_Chondrocytes_in_Rheumatoid_Arthritis	Glycogen_Degradation_II	0.348777463857413
Intrinsic_Prothrombin_Activation_Pathway	Cardiac__-adrenergic_Signaling	0.348779097119948
Salvage_Pathways_of_Pyrimidine_Deoxyribonucleotides	TWEAK_Signaling	0.34877946760442
Relaxin_Signaling	Leptin_Signaling_in_Obesity	0.348781142611684
Colorectal_Cancer_Metastasis_Signaling	VDR/RXR_Activation	0.348782974161682
Nitric_Oxide_Signaling_in_the_Cardiovascular_System	Basal_Cell_Carcinoma_Signaling	0.348782974161682
Inhibition_of_Matrix_Metalloproteases	Epithelial_Adherens_Junction_Signaling	0.348786480718944
Salvage_Pathways_of_Pyrimidine_Deoxyribonucleotides	Eicosanoid_Signaling	0.348786480718944
Atherosclerosis_Signaling	Leptin_Signaling_in_Obesity	0.348788484465951
Coagulation_System	Antigen_Presentation_Pathway	0.348788727136991
Coagulation_System	Glioma_Invasiveness_Signaling	0.348788727136991
Epithelial_Adherens_Junction_Signaling	Histamine_Degradation	0.348793493833469
Epithelial_Adherens_Junction_Signaling	Noradrenaline_and_Adrenaline_Degradation	0.348793493833469
Salvage_Pathways_of_Pyrimidine_Deoxyribonucleotides	Agranulocyte_Adhesion_and_Diapedesis	0.348793493833469
Salvage_Pathways_of_Pyrimidine_Deoxyribonucleotides	RAR_Activation	0.348793493833469
Salvage_Pathways_of_Pyrimidine_Deoxyribonucleotides	LPS/IL-1_Mediated_Inhibition_of_RXR_Function	0.348793493833469
Salvage_Pathways_of_Pyrimidine_Deoxyribonucleotides	Oncostatin_M_Signaling	0.348793493833469
Salvage_Pathways_of_Pyrimidine_Deoxyribonucleotides	Tryptophan_Degradation_to_2-amino-3-carboxymuconate_Semialdehyde	0.348793493833469
Inhibition_of_Matrix_Metalloproteases	Nitric_Oxide_Signaling_in_the_Cardiovascular_System	0.348797000390731
Role_of_Macrophages,_Fibroblasts_and_Endothelial_Cells_in_Rheumatoid_Arthritis	Cell_Cycle_Control_of_Chromosomal_Replication	0.348799784055745
Retinoate_Biosynthesis_I	Putrescine_Degradation_III	0.348800386382623
HIF1__Signaling	Role_of_CHK_Proteins_in_Cell_Cycle_Checkpoint_Control	0.34880210890198
Nitric_Oxide_Signaling_in_the_Cardiovascular_System	Histamine_Degradation	0.348804013505255
Nitric_Oxide_Signaling_in_the_Cardiovascular_System	Noradrenaline_and_Adrenaline_Degradation	0.348804013505255
Ephrin_Receptor_Signaling	Mismatch_Repair_in_Eukaryotes	0.348804410080183
EIF2_Signaling	Dopamine_Degradation	0.348807520062517
Putrescine_Degradation_III	Role_of_JAK2_in_Hormone-like_Cytokine_Signaling	0.348811026619779
EIF2_Signaling	Role_of_Tissue_Factor_in_Cancer	0.348821546291565
Role_of_Macrophages,_Fibroblasts_and_Endothelial_Cells_in_Rheumatoid_Arthritis	Regulation_of_the_Epithelial-Mesenchymal_Transition_Pathway	0.348830951267838
Role_of_Macrophages,_Fibroblasts_and_Endothelial_Cells_in_Rheumatoid_Arthritis	Prolactin_Signaling	0.348830951267838
DNA_damage-induced_14-3-3__Signaling	Leptin_Signaling_in_Obesity	0.34883757626762
Assembly_of_RNA_Polymerase_II_Complex	Role_of_CHK_Proteins_in_Cell_Cycle_Checkpoint_Control	0.348844088445393
Axonal_Guidance_Signaling	Estrogen_Receptor_Signaling	0.348844246031746
Role_of_Macrophages,_Fibroblasts_and_Endothelial_Cells_in_Rheumatoid_Arthritis	Glycine_Betaine_Degradation	0.348850430775396
HIF1__Signaling	Glycogen_Degradation_II	0.348852223449517
Thrombin_Signaling	Regulation_of_the_Epithelial-Mesenchymal_Transition_Pathway	0.348853105306924
P2Y_Purigenic_Receptor_Signaling_Pathway	Glycogen_Degradation_II	0.348854608117179
EIF2_Signaling	VDR/RXR_Activation	0.348856611864186
Bladder_Cancer_Signaling	Role_of_IL-17A_in_Psoriasis	0.348858114674441
Bladder_Cancer_Signaling	tRNA_Splicing	0.348858114674441
Prolactin_Signaling	Leptin_Signaling_in_Obesity	0.348858615611193
Coagulation_System	Dopamine_Degradation	0.348859649122807
cAMP-mediated_signaling	Actin_Cytoskeleton_Signaling	0.348860118421448
cAMP-mediated_signaling	Integrin_Signaling	0.348860118421448
cAMP-mediated_signaling	CREB_Signaling_in_Neurons	0.348860118421448
P2Y_Purigenic_Receptor_Signaling_Pathway	Role_of_CHK_Proteins_in_Cell_Cycle_Checkpoint_Control	0.348861621231703
Leptin_Signaling_in_Obesity	Wnt/_-catenin_Signaling	0.348862122168455
CXCR4_Signaling	Caveolar-mediated_Endocytosis_Signaling	0.348866314722978
CXCR4_Signaling	Regulation_of_eIF4_and_p70S6K_Signaling	0.348866314722978
Colorectal_Cancer_Metastasis_Signaling	Histamine_Degradation	0.348874144650496
Colorectal_Cancer_Metastasis_Signaling	Noradrenaline_and_Adrenaline_Degradation	0.348874144650496
Acute_Phase_Response_Signaling	Caveolar-mediated_Endocytosis_Signaling	0.348877651207758
Acute_Phase_Response_Signaling	Regulation_of_eIF4_and_p70S6K_Signaling	0.348877651207758
[truncated: 2,951 more rows]
