# Supplementary material for: In silico identification of drug target pathways in breast cancer subtypes using pathway cross-talk inhibition
Source: J Transl Med. 2018 Jun 5;16:154. doi: 10.1186/s12967-018-1535-2 (PMC5989433; doi:10.1186/s12967-018-1535-2)
Supplement: Supplementary file 4 — Additional file 4. Shows the network efficiency after inhibition of individual and combined pathway(s) in basal BC. [file 12967_2018_1535_MOESM4_ESM.xlsx]

## Sheet: Basal NE individual pathway
Pathway 1	NE
EIF2_Signaling	0.295946
Mismatch_Repair_in_Eukaryotes	0.312422
Aryl_Hydrocarbon_Receptor_Signaling	0.324144
Cell_Cycle_Control_of_Chromosomal_Replication	0.324655
Cell_Cycle:_G2/M_DNA_Damage_Checkpoint_Regulation	0.327216
Role_of_BRCA1_in_DNA_Damage_Response	0.330889
Noradrenaline_and_Adrenaline_Degradation	0.337056
Histamine_Degradation	0.339293
Tryptophan_Degradation_X_(Mammalian,_via_Tryptamine)	0.341347
Dopamine_Degradation	0.341826
Cellular_Effects_of_Sildenafil_(Viagra)	0.342287
Colorectal_Cancer_Metastasis_Signaling	0.342287
eNOS_Signaling	0.342287
Salvage_Pathways_of_Pyrimidine_Deoxyribonucleotides	0.342564
Oxidative_Ethanol_Degradation_III	0.342907
Putrescine_Degradation_III	0.342907
Ethanol_Degradation_II	0.342907
Triacylglycerol_Degradation	0.342907
Fatty_Acid__-oxidation_I	0.343681
Mitochondrial_Dysfunction	0.345288
HIF1__Signaling	0.345722
Fatty_Acid__-oxidation	0.346187
Extrinsic_Prothrombin_Activation_Pathway	0.346449
Calcium_Signaling	0.346449
Cardiac__-adrenergic_Signaling	0.346449
IL-1_Signaling	0.346449
Nitric_Oxide_Signaling_in_the_Cardiovascular_System	0.346449
Oncostatin_M_Signaling	0.347204
Assembly_of_RNA_Polymerase_II_Complex	0.347387
Phototransduction_Pathway	0.347481
Role_of_CHK_Proteins_in_Cell_Cycle_Checkpoint_Control	0.347481
Phenylalanine_Degradation_IV_(Mammalian,_via_Side_Chain)	0.348103
Coagulation_System	0.348103
Mitotic_Roles_of_Polo-Like_Kinase	0.348452
PI3K/AKT_Signaling	0.348816
Ethanol_Degradation_IV	0.349383
CXCR4_Signaling	0.349538
mTOR_Signaling	0.349997
Regulation_of_eIF4_and_p70S6K_Signaling	0.349997
Antigen_Presentation_Pathway	0.350971
Axonal_Guidance_Signaling	0.351771
Gluconeogenesis_I	0.353249
Glycolysis_I	0.353249

## Sheet: Basal NE combined pathways
Pathway 1	Pathway 2	NE
Role_of_BRCA1_in_DNA_Damage_Response	Mismatch_Repair_in_Eukaryotes	0.292641422904581
Role_of_BRCA1_in_DNA_Damage_Response	Cell_Cycle_Control_of_Chromosomal_Replication	0.297765106042417
Role_of_BRCA1_in_DNA_Damage_Response	Antigen_Presentation_Pathway	0.332852401273454
Role_of_BRCA1_in_DNA_Damage_Response	Ethanol_Degradation_IV	0.338261193524351
Role_of_BRCA1_in_DNA_Damage_Response	Salvage_Pathways_of_Pyrimidine_Deoxyribonucleotides	0.324017094017094
Role_of_BRCA1_in_DNA_Damage_Response	Tryptophan_Degradation_X_(Mammalian,_via_Tryptamine)	0.323873626373626
Role_of_BRCA1_in_DNA_Damage_Response	Cell_Cycle:_G2/M_DNA_Damage_Checkpoint_Regulation	0.315356524567051
Role_of_BRCA1_in_DNA_Damage_Response	EIF2_Signaling	0.279948107448107
Role_of_BRCA1_in_DNA_Damage_Response	Oxidative_Ethanol_Degradation_III	0.330503663003663
Role_of_BRCA1_in_DNA_Damage_Response	Putrescine_Degradation_III	0.330503663003663
Role_of_BRCA1_in_DNA_Damage_Response	Ethanol_Degradation_II	0.330503663003663
Role_of_BRCA1_in_DNA_Damage_Response	Histamine_Degradation	0.325247252747253
Role_of_BRCA1_in_DNA_Damage_Response	Noradrenaline_and_Adrenaline_Degradation	0.334539875329349
Role_of_BRCA1_in_DNA_Damage_Response	Mitotic_Roles_of_Polo-Like_Kinase	0.332995951417004
Role_of_BRCA1_in_DNA_Damage_Response	Aryl_Hydrocarbon_Receptor_Signaling	0.304306203056203
Role_of_BRCA1_in_DNA_Damage_Response	Cellular_Effects_of_Sildenafil_(Viagra)	0.327664835164835
Role_of_BRCA1_in_DNA_Damage_Response	Dopamine_Degradation	0.326272893772894
Role_of_BRCA1_in_DNA_Damage_Response	Triacylglycerol_Degradation	0.330503663003663
Role_of_BRCA1_in_DNA_Damage_Response	Axonal_Guidance_Signaling	0.336479018057965
Role_of_BRCA1_in_DNA_Damage_Response	Mitochondrial_Dysfunction	0.331657509157509
Role_of_BRCA1_in_DNA_Damage_Response	Phenylalanine_Degradation_IV_(Mammalian,_via_Side_Chain)	0.333977411477412
Role_of_BRCA1_in_DNA_Damage_Response	Colorectal_Cancer_Metastasis_Signaling	0.327664835164835
Role_of_BRCA1_in_DNA_Damage_Response	eNOS_Signaling	0.327664835164835
Role_of_BRCA1_in_DNA_Damage_Response	Fatty_Acid__-oxidation_I	0.332029914529915
Role_of_BRCA1_in_DNA_Damage_Response	Gluconeogenesis_I	0.338879249405565
Role_of_BRCA1_in_DNA_Damage_Response	Glycolysis_I	0.338879249405565
Role_of_BRCA1_in_DNA_Damage_Response	HIF1__Signaling	0.329917582417582
Role_of_BRCA1_in_DNA_Damage_Response	Coagulation_System	0.333977411477412
Role_of_BRCA1_in_DNA_Damage_Response	Extrinsic_Prothrombin_Activation_Pathway	0.331874236874237
Role_of_BRCA1_in_DNA_Damage_Response	mTOR_Signaling	0.336019536019536
Role_of_BRCA1_in_DNA_Damage_Response	PI3K/AKT_Signaling	0.334487179487179
Role_of_BRCA1_in_DNA_Damage_Response	Regulation_of_eIF4_and_p70S6K_Signaling	0.336019536019536
Role_of_BRCA1_in_DNA_Damage_Response	Assembly_of_RNA_Polymerase_II_Complex	0.335225885225885
Role_of_BRCA1_in_DNA_Damage_Response	Calcium_Signaling	0.331874236874237
Role_of_BRCA1_in_DNA_Damage_Response	Cardiac__-adrenergic_Signaling	0.331874236874237
Role_of_BRCA1_in_DNA_Damage_Response	CXCR4_Signaling	0.335210622710623
Role_of_BRCA1_in_DNA_Damage_Response	Fatty_Acid__-oxidation	0.33088850174216
Role_of_BRCA1_in_DNA_Damage_Response	IL-1_Signaling	0.331874236874237
Role_of_BRCA1_in_DNA_Damage_Response	Nitric_Oxide_Signaling_in_the_Cardiovascular_System	0.331874236874237
Role_of_BRCA1_in_DNA_Damage_Response	Oncostatin_M_Signaling	0.333772893772894
Role_of_BRCA1_in_DNA_Damage_Response	Phototransduction_Pathway	0.334291819291819
Role_of_BRCA1_in_DNA_Damage_Response	Role_of_CHK_Proteins_in_Cell_Cycle_Checkpoint_Control	0.334291819291819
Mismatch_Repair_in_Eukaryotes	Cell_Cycle_Control_of_Chromosomal_Replication	0.325067640692641
Mismatch_Repair_in_Eukaryotes	Antigen_Presentation_Pathway	0.316978343294133
Mismatch_Repair_in_Eukaryotes	Ethanol_Degradation_IV	0.3197518368571
Mismatch_Repair_in_Eukaryotes	Salvage_Pathways_of_Pyrimidine_Deoxyribonucleotides	0.310472802942315
Mismatch_Repair_in_Eukaryotes	Tryptophan_Degradation_X_(Mammalian,_via_Tryptamine)	0.308070557491289
Mismatch_Repair_in_Eukaryotes	Cell_Cycle:_G2/M_DNA_Damage_Checkpoint_Regulation	0.214893162393162
Mismatch_Repair_in_Eukaryotes	EIF2_Signaling	0.25590108401084
Mismatch_Repair_in_Eukaryotes	Oxidative_Ethanol_Degradation_III	0.312338850174216
Mismatch_Repair_in_Eukaryotes	Putrescine_Degradation_III	0.312338850174216
Mismatch_Repair_in_Eukaryotes	Ethanol_Degradation_II	0.312338850174216
Mismatch_Repair_in_Eukaryotes	Histamine_Degradation	0.311424216027875
Mismatch_Repair_in_Eukaryotes	Noradrenaline_and_Adrenaline_Degradation	0.293892542642543
Mismatch_Repair_in_Eukaryotes	Mitotic_Roles_of_Polo-Like_Kinase	0.312884615384615
Mismatch_Repair_in_Eukaryotes	Aryl_Hydrocarbon_Receptor_Signaling	0.234067944250871
Mismatch_Repair_in_Eukaryotes	Cellular_Effects_of_Sildenafil_(Viagra)	0.314185540069686
Mismatch_Repair_in_Eukaryotes	Dopamine_Degradation	0.306603271389857
Mismatch_Repair_in_Eukaryotes	Triacylglycerol_Degradation	0.312338850174216
Mismatch_Repair_in_Eukaryotes	Axonal_Guidance_Signaling	0.319041514041514
Mismatch_Repair_in_Eukaryotes	Mitochondrial_Dysfunction	0.311416957026713
Mismatch_Repair_in_Eukaryotes	Phenylalanine_Degradation_IV_(Mammalian,_via_Side_Chain)	0.315164053426249
Mismatch_Repair_in_Eukaryotes	Colorectal_Cancer_Metastasis_Signaling	0.314185540069686
Mismatch_Repair_in_Eukaryotes	eNOS_Signaling	0.314185540069686
Mismatch_Repair_in_Eukaryotes	Fatty_Acid__-oxidation_I	0.313151858304297
Mismatch_Repair_in_Eukaryotes	Gluconeogenesis_I	0.317820512820513
Mismatch_Repair_in_Eukaryotes	Glycolysis_I	0.317820512820513
Mismatch_Repair_in_Eukaryotes	HIF1__Signaling	0.31205574912892
Mismatch_Repair_in_Eukaryotes	Coagulation_System	0.315164053426249
Mismatch_Repair_in_Eukaryotes	Extrinsic_Prothrombin_Activation_Pathway	0.314185540069686
Mismatch_Repair_in_Eukaryotes	mTOR_Signaling	0.316321138211382
Mismatch_Repair_in_Eukaryotes	PI3K/AKT_Signaling	0.315121951219512
Mismatch_Repair_in_Eukaryotes	Regulation_of_eIF4_and_p70S6K_Signaling	0.316321138211382
Mismatch_Repair_in_Eukaryotes	Assembly_of_RNA_Polymerase_II_Complex	0.313803716608595
Mismatch_Repair_in_Eukaryotes	Calcium_Signaling	0.314185540069686
Mismatch_Repair_in_Eukaryotes	Cardiac__-adrenergic_Signaling	0.314185540069686
Mismatch_Repair_in_Eukaryotes	CXCR4_Signaling	0.316929442508711
Mismatch_Repair_in_Eukaryotes	Fatty_Acid__-oxidation	0.313151858304297
Mismatch_Repair_in_Eukaryotes	IL-1_Signaling	0.314185540069686
Mismatch_Repair_in_Eukaryotes	Nitric_Oxide_Signaling_in_the_Cardiovascular_System	0.314185540069686
Mismatch_Repair_in_Eukaryotes	Oncostatin_M_Signaling	0.313429152148664
Mismatch_Repair_in_Eukaryotes	Phototransduction_Pathway	0.315635404568331
Mismatch_Repair_in_Eukaryotes	Role_of_CHK_Proteins_in_Cell_Cycle_Checkpoint_Control	0.315635404568331
Cell_Cycle_Control_of_Chromosomal_Replication	Antigen_Presentation_Pathway	0.326298701298701
Cell_Cycle_Control_of_Chromosomal_Replication	Ethanol_Degradation_IV	0.326196842373313
Cell_Cycle_Control_of_Chromosomal_Replication	Salvage_Pathways_of_Pyrimidine_Deoxyribonucleotides	0.320145502645503
Cell_Cycle_Control_of_Chromosomal_Replication	Tryptophan_Degradation_X_(Mammalian,_via_Tryptamine)	0.317995086923658
Cell_Cycle_Control_of_Chromosomal_Replication	Cell_Cycle:_G2/M_DNA_Damage_Checkpoint_Regulation	0.245798319327731
Cell_Cycle_Control_of_Chromosomal_Replication	EIF2_Signaling	0.274928193499622
Cell_Cycle_Control_of_Chromosomal_Replication	Oxidative_Ethanol_Degradation_III	0.321301965230537
Cell_Cycle_Control_of_Chromosomal_Replication	Putrescine_Degradation_III	0.321301965230537
Cell_Cycle_Control_of_Chromosomal_Replication	Ethanol_Degradation_II	0.321301965230537
Cell_Cycle_Control_of_Chromosomal_Replication	Histamine_Degradation	0.317254346182918
Cell_Cycle_Control_of_Chromosomal_Replication	Noradrenaline_and_Adrenaline_Degradation	0.306782713085234
Cell_Cycle_Control_of_Chromosomal_Replication	Mitotic_Roles_of_Polo-Like_Kinase	0.331532613045218
Cell_Cycle_Control_of_Chromosomal_Replication	Aryl_Hydrocarbon_Receptor_Signaling	0.326600529100529
Cell_Cycle_Control_of_Chromosomal_Replication	Cellular_Effects_of_Sildenafil_(Viagra)	0.326201814058957
Cell_Cycle_Control_of_Chromosomal_Replication	Dopamine_Degradation	0.318955026455026
Cell_Cycle_Control_of_Chromosomal_Replication	Triacylglycerol_Degradation	0.321301965230537
Cell_Cycle_Control_of_Chromosomal_Replication	Axonal_Guidance_Signaling	0.36171468587435
Cell_Cycle_Control_of_Chromosomal_Replication	Mitochondrial_Dysfunction	0.324873393801965
Cell_Cycle_Control_of_Chromosomal_Replication	Phenylalanine_Degradation_IV_(Mammalian,_via_Side_Chain)	0.327227891156463
Cell_Cycle_Control_of_Chromosomal_Replication	Colorectal_Cancer_Metastasis_Signaling	0.326201814058957
Cell_Cycle_Control_of_Chromosomal_Replication	eNOS_Signaling	0.326201814058957
Cell_Cycle_Control_of_Chromosomal_Replication	Fatty_Acid__-oxidation_I	0.322360166288738
Cell_Cycle_Control_of_Chromosomal_Replication	Gluconeogenesis_I	0.334473789515806
Cell_Cycle_Control_of_Chromosomal_Replication	Glycolysis_I	0.334473789515806
Cell_Cycle_Control_of_Chromosomal_Replication	HIF1__Signaling	0.323973922902494
Cell_Cycle_Control_of_Chromosomal_Replication	Coagulation_System	0.327227891156463
Cell_Cycle_Control_of_Chromosomal_Replication	Extrinsic_Prothrombin_Activation_Pathway	0.324655012155012
Cell_Cycle_Control_of_Chromosomal_Replication	mTOR_Signaling	0.330646258503401
Cell_Cycle_Control_of_Chromosomal_Replication	PI3K/AKT_Signaling	0.329984882842026
Cell_Cycle_Control_of_Chromosomal_Replication	Regulation_of_eIF4_and_p70S6K_Signaling	0.330646258503401
Cell_Cycle_Control_of_Chromosomal_Replication	Assembly_of_RNA_Polymerase_II_Complex	0.326249055177627
Cell_Cycle_Control_of_Chromosomal_Replication	Calcium_Signaling	0.324655012155012
Cell_Cycle_Control_of_Chromosomal_Replication	Cardiac__-adrenergic_Signaling	0.324655012155012
Cell_Cycle_Control_of_Chromosomal_Replication	CXCR4_Signaling	0.36171468587435
Cell_Cycle_Control_of_Chromosomal_Replication	Fatty_Acid__-oxidation	0.324608843537415
Cell_Cycle_Control_of_Chromosomal_Replication	IL-1_Signaling	0.324655012155012
Cell_Cycle_Control_of_Chromosomal_Replication	Nitric_Oxide_Signaling_in_the_Cardiovascular_System	0.324655012155012
Cell_Cycle_Control_of_Chromosomal_Replication	Oncostatin_M_Signaling	0.326592970521542
Cell_Cycle_Control_of_Chromosomal_Replication	Phototransduction_Pathway	0.326865079365079
Cell_Cycle_Control_of_Chromosomal_Replication	Role_of_CHK_Proteins_in_Cell_Cycle_Checkpoint_Control	0.326865079365079
Antigen_Presentation_Pathway	Ethanol_Degradation_IV	0.356281281281281
Antigen_Presentation_Pathway	Salvage_Pathways_of_Pyrimidine_Deoxyribonucleotides	0.349363794100636
Antigen_Presentation_Pathway	Tryptophan_Degradation_X_(Mammalian,_via_Tryptamine)	0.350806503438082
Antigen_Presentation_Pathway	Cell_Cycle:_G2/M_DNA_Damage_Checkpoint_Regulation	0.342082558749225
Antigen_Presentation_Pathway	EIF2_Signaling	0.29778291883555
Antigen_Presentation_Pathway	Oxidative_Ethanol_Degradation_III	0.349132446500868
Antigen_Presentation_Pathway	Putrescine_Degradation_III	0.349132446500868
Antigen_Presentation_Pathway	Ethanol_Degradation_II	0.349132446500868
Antigen_Presentation_Pathway	Histamine_Degradation	0.350032131611079
Antigen_Presentation_Pathway	Noradrenaline_and_Adrenaline_Degradation	0.334424462056041
Antigen_Presentation_Pathway	Mitotic_Roles_of_Polo-Like_Kinase	0.354971889182416
Antigen_Presentation_Pathway	Aryl_Hydrocarbon_Receptor_Signaling	0.326491588333694
Antigen_Presentation_Pathway	Cellular_Effects_of_Sildenafil_(Viagra)	0.348480174795964
Antigen_Presentation_Pathway	Dopamine_Degradation	0.354125698862541
Antigen_Presentation_Pathway	Triacylglycerol_Degradation	0.349132446500868
Antigen_Presentation_Pathway	Axonal_Guidance_Signaling	0.358561945404051
Antigen_Presentation_Pathway	Mitochondrial_Dysfunction	0.351898978214768
Antigen_Presentation_Pathway	Phenylalanine_Degradation_IV_(Mammalian,_via_Side_Chain)	0.350970695970696
Antigen_Presentation_Pathway	Colorectal_Cancer_Metastasis_Signaling	0.348480174795964
Antigen_Presentation_Pathway	eNOS_Signaling	0.348480174795964
Antigen_Presentation_Pathway	Fatty_Acid__-oxidation_I	0.350032131611079
Antigen_Presentation_Pathway	Gluconeogenesis_I	0.360566957935379
Antigen_Presentation_Pathway	Glycolysis_I	0.360566957935379
Antigen_Presentation_Pathway	HIF1__Signaling	0.352853287063813
Antigen_Presentation_Pathway	Coagulation_System	0.350970695970696
Antigen_Presentation_Pathway	Extrinsic_Prothrombin_Activation_Pathway	0.35284364758049
Antigen_Presentation_Pathway	mTOR_Signaling	0.356966133281923
Antigen_Presentation_Pathway	PI3K/AKT_Signaling	0.35559411348885
Antigen_Presentation_Pathway	Regulation_of_eIF4_and_p70S6K_Signaling	0.356966133281923
Antigen_Presentation_Pathway	Assembly_of_RNA_Polymerase_II_Complex	0.354090354090354
Antigen_Presentation_Pathway	Calcium_Signaling	0.35284364758049
Antigen_Presentation_Pathway	Cardiac__-adrenergic_Signaling	0.35284364758049
Antigen_Presentation_Pathway	CXCR4_Signaling	0.356323501060343
Antigen_Presentation_Pathway	Fatty_Acid__-oxidation	0.352943255574835
Antigen_Presentation_Pathway	IL-1_Signaling	0.35284364758049
Antigen_Presentation_Pathway	Nitric_Oxide_Signaling_in_the_Cardiovascular_System	0.35284364758049
Antigen_Presentation_Pathway	Oncostatin_M_Signaling	0.354125698862541
Antigen_Presentation_Pathway	Phototransduction_Pathway	0.354199601568023
Antigen_Presentation_Pathway	Role_of_CHK_Proteins_in_Cell_Cycle_Checkpoint_Control	0.354199601568023
Ethanol_Degradation_IV	Salvage_Pathways_of_Pyrimidine_Deoxyribonucleotides	0.348637619690251
Ethanol_Degradation_IV	Tryptophan_Degradation_X_(Mammalian,_via_Tryptamine)	0.346099222415012
Ethanol_Degradation_IV	Cell_Cycle:_G2/M_DNA_Damage_Checkpoint_Regulation	0.329713924450767
Ethanol_Degradation_IV	EIF2_Signaling	0.295308784782469
Ethanol_Degradation_IV	Oxidative_Ethanol_Degradation_III	0.347911445279866
Ethanol_Degradation_IV	Putrescine_Degradation_III	0.347911445279866
Ethanol_Degradation_IV	Ethanol_Degradation_II	0.347911445279866
Ethanol_Degradation_IV	Histamine_Degradation	0.343711843711844
Ethanol_Degradation_IV	Noradrenaline_and_Adrenaline_Degradation	0.342633611054664
Ethanol_Degradation_IV	Mitotic_Roles_of_Polo-Like_Kinase	0.352929621350674
Ethanol_Degradation_IV	Aryl_Hydrocarbon_Receptor_Signaling	0.325413037255143
Ethanol_Degradation_IV	Cellular_Effects_of_Sildenafil_(Viagra)	0.347191697191697
Ethanol_Degradation_IV	Dopamine_Degradation	0.345957843326264
Ethanol_Degradation_IV	Triacylglycerol_Degradation	0.347911445279866
Ethanol_Degradation_IV	Axonal_Guidance_Signaling	0.357081893923999
Ethanol_Degradation_IV	Mitochondrial_Dysfunction	0.349980721033353
Ethanol_Degradation_IV	Phenylalanine_Degradation_IV_(Mammalian,_via_Side_Chain)	0.353251719041193
Ethanol_Degradation_IV	Colorectal_Cancer_Metastasis_Signaling	0.347191697191697
Ethanol_Degradation_IV	eNOS_Signaling	0.347191697191697
Ethanol_Degradation_IV	Fatty_Acid__-oxidation_I	0.348811130390078
Ethanol_Degradation_IV	Gluconeogenesis_I	0.358524690103637
Ethanol_Degradation_IV	Glycolysis_I	0.358524690103637
Ethanol_Degradation_IV	HIF1__Signaling	0.350732600732601
Ethanol_Degradation_IV	Coagulation_System	0.353251719041193
Ethanol_Degradation_IV	Extrinsic_Prothrombin_Activation_Pathway	0.35133024869867
Ethanol_Degradation_IV	mTOR_Signaling	0.355186042028147
Ethanol_Degradation_IV	PI3K/AKT_Signaling	0.353814022235075
Ethanol_Degradation_IV	Regulation_of_eIF4_and_p70S6K_Signaling	0.355186042028147
Ethanol_Degradation_IV	Assembly_of_RNA_Polymerase_II_Complex	0.352666923719555
Ethanol_Degradation_IV	Calcium_Signaling	0.35133024869867
Ethanol_Degradation_IV	Cardiac__-adrenergic_Signaling	0.35133024869867
Ethanol_Degradation_IV	CXCR4_Signaling	0.354761904761905
Ethanol_Degradation_IV	Fatty_Acid__-oxidation	0.351722254353833
Ethanol_Degradation_IV	IL-1_Signaling	0.35133024869867
Ethanol_Degradation_IV	Nitric_Oxide_Signaling_in_the_Cardiovascular_System	0.35133024869867
Ethanol_Degradation_IV	Oncostatin_M_Signaling	0.352207441681126
Ethanol_Degradation_IV	Phototransduction_Pathway	0.349383394383394
Ethanol_Degradation_IV	Role_of_CHK_Proteins_in_Cell_Cycle_Checkpoint_Control	0.349383394383394
Salvage_Pathways_of_Pyrimidine_Deoxyribonucleotides	Tryptophan_Degradation_X_(Mammalian,_via_Tryptamine)	0.341001742160279
Salvage_Pathways_of_Pyrimidine_Deoxyribonucleotides	Cell_Cycle:_G2/M_DNA_Damage_Checkpoint_Regulation	0.324054741554742
Salvage_Pathways_of_Pyrimidine_Deoxyribonucleotides	EIF2_Signaling	0.292012195121951
Salvage_Pathways_of_Pyrimidine_Deoxyribonucleotides	Oxidative_Ethanol_Degradation_III	0.34154181184669
Salvage_Pathways_of_Pyrimidine_Deoxyribonucleotides	Putrescine_Degradation_III	0.34154181184669
Salvage_Pathways_of_Pyrimidine_Deoxyribonucleotides	Ethanol_Degradation_II	0.34154181184669
Salvage_Pathways_of_Pyrimidine_Deoxyribonucleotides	Histamine_Degradation	0.336933797909408
Salvage_Pathways_of_Pyrimidine_Deoxyribonucleotides	Noradrenaline_and_Adrenaline_Degradation	0.334346764346764
Salvage_Pathways_of_Pyrimidine_Deoxyribonucleotides	Mitotic_Roles_of_Polo-Like_Kinase	0.345976800976801
Salvage_Pathways_of_Pyrimidine_Deoxyribonucleotides	Aryl_Hydrocarbon_Receptor_Signaling	0.320865404920283
Salvage_Pathways_of_Pyrimidine_Deoxyribonucleotides	Cellular_Effects_of_Sildenafil_(Viagra)	0.340078397212544
Salvage_Pathways_of_Pyrimidine_Deoxyribonucleotides	Dopamine_Degradation	0.339593495934959
Salvage_Pathways_of_Pyrimidine_Deoxyribonucleotides	Triacylglycerol_Degradation	0.34154181184669
Salvage_Pathways_of_Pyrimidine_Deoxyribonucleotides	Axonal_Guidance_Signaling	0.349539072039072
Salvage_Pathways_of_Pyrimidine_Deoxyribonucleotides	Mitochondrial_Dysfunction	0.343066202090592
Salvage_Pathways_of_Pyrimidine_Deoxyribonucleotides	Phenylalanine_Degradation_IV_(Mammalian,_via_Side_Chain)	0.346184668989547
Salvage_Pathways_of_Pyrimidine_Deoxyribonucleotides	Colorectal_Cancer_Metastasis_Signaling	0.340078397212544
Salvage_Pathways_of_Pyrimidine_Deoxyribonucleotides	eNOS_Signaling	0.340078397212544
Salvage_Pathways_of_Pyrimidine_Deoxyribonucleotides	Fatty_Acid__-oxidation_I	0.34154181184669
Salvage_Pathways_of_Pyrimidine_Deoxyribonucleotides	Gluconeogenesis_I	0.351019536019536
Salvage_Pathways_of_Pyrimidine_Deoxyribonucleotides	Glycolysis_I	0.351019536019536
Salvage_Pathways_of_Pyrimidine_Deoxyribonucleotides	HIF1__Signaling	0.343887921022067
Salvage_Pathways_of_Pyrimidine_Deoxyribonucleotides	Coagulation_System	0.346184668989547
Salvage_Pathways_of_Pyrimidine_Deoxyribonucleotides	Extrinsic_Prothrombin_Activation_Pathway	0.344285714285714
Salvage_Pathways_of_Pyrimidine_Deoxyribonucleotides	mTOR_Signaling	0.347941347270616
Salvage_Pathways_of_Pyrimidine_Deoxyribonucleotides	PI3K/AKT_Signaling	0.346701509872242
Salvage_Pathways_of_Pyrimidine_Deoxyribonucleotides	Regulation_of_eIF4_and_p70S6K_Signaling	0.347941347270616
Salvage_Pathways_of_Pyrimidine_Deoxyribonucleotides	Assembly_of_RNA_Polymerase_II_Complex	0.345331010452962
Salvage_Pathways_of_Pyrimidine_Deoxyribonucleotides	Calcium_Signaling	0.344285714285714
Salvage_Pathways_of_Pyrimidine_Deoxyribonucleotides	Cardiac__-adrenergic_Signaling	0.344285714285714
Salvage_Pathways_of_Pyrimidine_Deoxyribonucleotides	CXCR4_Signaling	0.347488385598142
Salvage_Pathways_of_Pyrimidine_Deoxyribonucleotides	Fatty_Acid__-oxidation	0.344172473867596
Salvage_Pathways_of_Pyrimidine_Deoxyribonucleotides	IL-1_Signaling	0.344285714285714
Salvage_Pathways_of_Pyrimidine_Deoxyribonucleotides	Nitric_Oxide_Signaling_in_the_Cardiovascular_System	0.344285714285714
Salvage_Pathways_of_Pyrimidine_Deoxyribonucleotides	Oncostatin_M_Signaling	0.345078397212544
Salvage_Pathways_of_Pyrimidine_Deoxyribonucleotides	Phototransduction_Pathway	0.345734610917538
Salvage_Pathways_of_Pyrimidine_Deoxyribonucleotides	Role_of_CHK_Proteins_in_Cell_Cycle_Checkpoint_Control	0.345734610917538
Tryptophan_Degradation_X_(Mammalian,_via_Tryptamine)	Cell_Cycle:_G2/M_DNA_Damage_Checkpoint_Regulation	0.323290598290598
Tryptophan_Degradation_X_(Mammalian,_via_Tryptamine)	EIF2_Signaling	0.290975609756098
Tryptophan_Degradation_X_(Mammalian,_via_Tryptamine)	Oxidative_Ethanol_Degradation_III	0.339654471544715
Tryptophan_Degradation_X_(Mammalian,_via_Tryptamine)	Putrescine_Degradation_III	0.339654471544715
Tryptophan_Degradation_X_(Mammalian,_via_Tryptamine)	Ethanol_Degradation_II	0.339654471544715
Tryptophan_Degradation_X_(Mammalian,_via_Tryptamine)	Histamine_Degradation	0.331408246225319
Tryptophan_Degradation_X_(Mammalian,_via_Tryptamine)	Noradrenaline_and_Adrenaline_Degradation	0.338508129297603
Tryptophan_Degradation_X_(Mammalian,_via_Tryptamine)	Mitotic_Roles_of_Polo-Like_Kinase	0.34470695970696
Tryptophan_Degradation_X_(Mammalian,_via_Tryptamine)	Aryl_Hydrocarbon_Receptor_Signaling	0.319587820715869
Tryptophan_Degradation_X_(Mammalian,_via_Tryptamine)	Cellular_Effects_of_Sildenafil_(Viagra)	0.33869918699187
Tryptophan_Degradation_X_(Mammalian,_via_Tryptamine)	Dopamine_Degradation	0.338681765389082
Tryptophan_Degradation_X_(Mammalian,_via_Tryptamine)	Triacylglycerol_Degradation	0.339654471544715
Tryptophan_Degradation_X_(Mammalian,_via_Tryptamine)	Axonal_Guidance_Signaling	0.348122710622711
Tryptophan_Degradation_X_(Mammalian,_via_Tryptamine)	Mitochondrial_Dysfunction	0.341849593495935
Tryptophan_Degradation_X_(Mammalian,_via_Tryptamine)	Phenylalanine_Degradation_IV_(Mammalian,_via_Side_Chain)	0.345435540069686
Tryptophan_Degradation_X_(Mammalian,_via_Tryptamine)	Colorectal_Cancer_Metastasis_Signaling	0.33869918699187
Tryptophan_Degradation_X_(Mammalian,_via_Tryptamine)	eNOS_Signaling	0.33869918699187
Tryptophan_Degradation_X_(Mammalian,_via_Tryptamine)	Fatty_Acid__-oxidation_I	0.340467479674797
Tryptophan_Degradation_X_(Mammalian,_via_Tryptamine)	Gluconeogenesis_I	0.349749694749695
Tryptophan_Degradation_X_(Mammalian,_via_Tryptamine)	Glycolysis_I	0.349749694749695
Tryptophan_Degradation_X_(Mammalian,_via_Tryptamine)	HIF1__Signaling	0.344155052264808
Tryptophan_Degradation_X_(Mammalian,_via_Tryptamine)	Coagulation_System	0.345435540069686
Tryptophan_Degradation_X_(Mammalian,_via_Tryptamine)	Extrinsic_Prothrombin_Activation_Pathway	0.342967479674797
Tryptophan_Degradation_X_(Mammalian,_via_Tryptamine)	mTOR_Signaling	0.346692799070848
Tryptophan_Degradation_X_(Mammalian,_via_Tryptamine)	PI3K/AKT_Signaling	0.345452961672474
Tryptophan_Degradation_X_(Mammalian,_via_Tryptamine)	Regulation_of_eIF4_and_p70S6K_Signaling	0.346692799070848
Tryptophan_Degradation_X_(Mammalian,_via_Tryptamine)	Assembly_of_RNA_Polymerase_II_Complex	0.344155052264808
Tryptophan_Degradation_X_(Mammalian,_via_Tryptamine)	Calcium_Signaling	0.342967479674797
Tryptophan_Degradation_X_(Mammalian,_via_Tryptamine)	Cardiac__-adrenergic_Signaling	0.342967479674797
Tryptophan_Degradation_X_(Mammalian,_via_Tryptamine)	CXCR4_Signaling	0.346181765389082
Tryptophan_Degradation_X_(Mammalian,_via_Tryptamine)	Fatty_Acid__-oxidation	0.343098141695703
Tryptophan_Degradation_X_(Mammalian,_via_Tryptamine)	IL-1_Signaling	0.342967479674797
Tryptophan_Degradation_X_(Mammalian,_via_Tryptamine)	Nitric_Oxide_Signaling_in_the_Cardiovascular_System	0.342967479674797
Tryptophan_Degradation_X_(Mammalian,_via_Tryptamine)	Oncostatin_M_Signaling	0.343861788617886
Tryptophan_Degradation_X_(Mammalian,_via_Tryptamine)	Phototransduction_Pathway	0.344253774680604
Tryptophan_Degradation_X_(Mammalian,_via_Tryptamine)	Role_of_CHK_Proteins_in_Cell_Cycle_Checkpoint_Control	0.344253774680604
Cell_Cycle:_G2/M_DNA_Damage_Checkpoint_Regulation	EIF2_Signaling	0.290346967846968
Cell_Cycle:_G2/M_DNA_Damage_Checkpoint_Regulation	Oxidative_Ethanol_Degradation_III	0.32469881969882
Cell_Cycle:_G2/M_DNA_Damage_Checkpoint_Regulation	Putrescine_Degradation_III	0.32469881969882
Cell_Cycle:_G2/M_DNA_Damage_Checkpoint_Regulation	Ethanol_Degradation_II	0.32469881969882
Cell_Cycle:_G2/M_DNA_Damage_Checkpoint_Regulation	Histamine_Degradation	0.318174880674881
Cell_Cycle:_G2/M_DNA_Damage_Checkpoint_Regulation	Noradrenaline_and_Adrenaline_Degradation	0.332654820812716
Cell_Cycle:_G2/M_DNA_Damage_Checkpoint_Regulation	Mitotic_Roles_of_Polo-Like_Kinase	0.339692700219016
Cell_Cycle:_G2/M_DNA_Damage_Checkpoint_Regulation	Aryl_Hydrocarbon_Receptor_Signaling	0.263681318681319
Cell_Cycle:_G2/M_DNA_Damage_Checkpoint_Regulation	Cellular_Effects_of_Sildenafil_(Viagra)	0.323526658526659
Cell_Cycle:_G2/M_DNA_Damage_Checkpoint_Regulation	Dopamine_Degradation	0.330918803418803
Cell_Cycle:_G2/M_DNA_Damage_Checkpoint_Regulation	Triacylglycerol_Degradation	0.32469881969882
Cell_Cycle:_G2/M_DNA_Damage_Checkpoint_Regulation	Axonal_Guidance_Signaling	0.332871709187499
Cell_Cycle:_G2/M_DNA_Damage_Checkpoint_Regulation	Mitochondrial_Dysfunction	0.331813186813187
Cell_Cycle:_G2/M_DNA_Damage_Checkpoint_Regulation	Phenylalanine_Degradation_IV_(Mammalian,_via_Side_Chain)	0.330918803418803
Cell_Cycle:_G2/M_DNA_Damage_Checkpoint_Regulation	Colorectal_Cancer_Metastasis_Signaling	0.323526658526659
Cell_Cycle:_G2/M_DNA_Damage_Checkpoint_Regulation	eNOS_Signaling	0.323526658526659
Cell_Cycle:_G2/M_DNA_Damage_Checkpoint_Regulation	Fatty_Acid__-oxidation_I	0.325553520553521
Cell_Cycle:_G2/M_DNA_Damage_Checkpoint_Regulation	Gluconeogenesis_I	0.338537047747574
Cell_Cycle:_G2/M_DNA_Damage_Checkpoint_Regulation	Glycolysis_I	0.338537047747574
Cell_Cycle:_G2/M_DNA_Damage_Checkpoint_Regulation	HIF1__Signaling	0.329634208384208
Cell_Cycle:_G2/M_DNA_Damage_Checkpoint_Regulation	Coagulation_System	0.330918803418803
Cell_Cycle:_G2/M_DNA_Damage_Checkpoint_Regulation	Extrinsic_Prothrombin_Activation_Pathway	0.328267195767196
Cell_Cycle:_G2/M_DNA_Damage_Checkpoint_Regulation	mTOR_Signaling	0.333580077330077
Cell_Cycle:_G2/M_DNA_Damage_Checkpoint_Regulation	PI3K/AKT_Signaling	0.331813186813187
Cell_Cycle:_G2/M_DNA_Damage_Checkpoint_Regulation	Regulation_of_eIF4_and_p70S6K_Signaling	0.333580077330077
Cell_Cycle:_G2/M_DNA_Damage_Checkpoint_Regulation	Assembly_of_RNA_Polymerase_II_Complex	0.331642755392755
Cell_Cycle:_G2/M_DNA_Damage_Checkpoint_Regulation	Calcium_Signaling	0.328267195767196
Cell_Cycle:_G2/M_DNA_Damage_Checkpoint_Regulation	Cardiac__-adrenergic_Signaling	0.328267195767196
Cell_Cycle:_G2/M_DNA_Damage_Checkpoint_Regulation	CXCR4_Signaling	0.331530321530322
Cell_Cycle:_G2/M_DNA_Damage_Checkpoint_Regulation	Fatty_Acid__-oxidation	0.328803418803419
Cell_Cycle:_G2/M_DNA_Damage_Checkpoint_Regulation	IL-1_Signaling	0.328267195767196
Cell_Cycle:_G2/M_DNA_Damage_Checkpoint_Regulation	Nitric_Oxide_Signaling_in_the_Cardiovascular_System	0.328267195767196
Cell_Cycle:_G2/M_DNA_Damage_Checkpoint_Regulation	Oncostatin_M_Signaling	0.327216415021293
Cell_Cycle:_G2/M_DNA_Damage_Checkpoint_Regulation	Phototransduction_Pathway	0.329482091982092
Cell_Cycle:_G2/M_DNA_Damage_Checkpoint_Regulation	Role_of_CHK_Proteins_in_Cell_Cycle_Checkpoint_Control	0.329482091982092
EIF2_Signaling	Oxidative_Ethanol_Degradation_III	0.292572590011614
EIF2_Signaling	Putrescine_Degradation_III	0.292572590011614
EIF2_Signaling	Ethanol_Degradation_II	0.292572590011614
EIF2_Signaling	Histamine_Degradation	0.288065718157182
EIF2_Signaling	Noradrenaline_and_Adrenaline_Degradation	0.290003052503053
EIF2_Signaling	Mitotic_Roles_of_Polo-Like_Kinase	0.296696682946683
EIF2_Signaling	Aryl_Hydrocarbon_Receptor_Signaling	0.287170969274628
EIF2_Signaling	Cellular_Effects_of_Sildenafil_(Viagra)	0.29232868757259
EIF2_Signaling	Dopamine_Degradation	0.294038908246225
EIF2_Signaling	Triacylglycerol_Degradation	0.292572590011614
EIF2_Signaling	Axonal_Guidance_Signaling	0.300885225885226
EIF2_Signaling	Mitochondrial_Dysfunction	0.290896728610143
EIF2_Signaling	Phenylalanine_Degradation_IV_(Mammalian,_via_Side_Chain)	0.298069105691057
EIF2_Signaling	Colorectal_Cancer_Metastasis_Signaling	0.29232868757259
EIF2_Signaling	eNOS_Signaling	0.29232868757259
EIF2_Signaling	Fatty_Acid__-oxidation_I	0.293385598141696
EIF2_Signaling	Gluconeogenesis_I	0.325396825396825
EIF2_Signaling	Glycolysis_I	0.325396825396825
EIF2_Signaling	HIF1__Signaling	0.296130952380952
EIF2_Signaling	Coagulation_System	0.298069105691057
EIF2_Signaling	Extrinsic_Prothrombin_Activation_Pathway	0.296837979094077
EIF2_Signaling	mTOR_Signaling	0.325396825396825
EIF2_Signaling	PI3K/AKT_Signaling	0.299610917537747
EIF2_Signaling	Regulation_of_eIF4_and_p70S6K_Signaling	0.325396825396825
EIF2_Signaling	Assembly_of_RNA_Polymerase_II_Complex	0.297878919860627
EIF2_Signaling	Calcium_Signaling	0.296837979094077
EIF2_Signaling	Cardiac__-adrenergic_Signaling	0.296837979094077
EIF2_Signaling	CXCR4_Signaling	0.299706736353078
EIF2_Signaling	Fatty_Acid__-oxidation	0.296056910569106
EIF2_Signaling	IL-1_Signaling	0.296837979094077
EIF2_Signaling	Nitric_Oxide_Signaling_in_the_Cardiovascular_System	0.296837979094077
EIF2_Signaling	Oncostatin_M_Signaling	0.298475609756098
EIF2_Signaling	Phototransduction_Pathway	0.297174796747967
EIF2_Signaling	Role_of_CHK_Proteins_in_Cell_Cycle_Checkpoint_Control	0.297174796747967
Oxidative_Ethanol_Degradation_III	Putrescine_Degradation_III	0.341292102206736
Oxidative_Ethanol_Degradation_III	Ethanol_Degradation_II	0.341292102206736
Oxidative_Ethanol_Degradation_III	Histamine_Degradation	0.337497096399535
Oxidative_Ethanol_Degradation_III	Noradrenaline_and_Adrenaline_Degradation	0.335641025641026
Oxidative_Ethanol_Degradation_III	Mitotic_Roles_of_Polo-Like_Kinase	0.346428571428571
Oxidative_Ethanol_Degradation_III	Aryl_Hydrocarbon_Receptor_Signaling	0.321286426987646
Oxidative_Ethanol_Degradation_III	Cellular_Effects_of_Sildenafil_(Viagra)	0.340641695702671
Oxidative_Ethanol_Degradation_III	Dopamine_Degradation	0.339851916376307
Oxidative_Ethanol_Degradation_III	Triacylglycerol_Degradation	0.341292102206736
Oxidative_Ethanol_Degradation_III	Axonal_Guidance_Signaling	0.35002442002442
Oxidative_Ethanol_Degradation_III	Mitochondrial_Dysfunction	0.343487224157956
Oxidative_Ethanol_Degradation_III	Phenylalanine_Degradation_IV_(Mammalian,_via_Side_Chain)	0.346443089430894
Oxidative_Ethanol_Degradation_III	Colorectal_Cancer_Metastasis_Signaling	0.340641695702671
Oxidative_Ethanol_Degradation_III	eNOS_Signaling	0.340641695702671
Oxidative_Ethanol_Degradation_III	Fatty_Acid__-oxidation_I	0.342105110336818
Oxidative_Ethanol_Degradation_III	Gluconeogenesis_I	0.351471306471306
Oxidative_Ethanol_Degradation_III	Glycolysis_I	0.351471306471306
Oxidative_Ethanol_Degradation_III	HIF1__Signaling	0.344044715447154
Oxidative_Ethanol_Degradation_III	Coagulation_System	0.346443089430894
Oxidative_Ethanol_Degradation_III	Extrinsic_Prothrombin_Activation_Pathway	0.344706736353078
Oxidative_Ethanol_Degradation_III	mTOR_Signaling	0.348330429732869
Oxidative_Ethanol_Degradation_III	PI3K/AKT_Signaling	0.347090592334495
Oxidative_Ethanol_Degradation_III	Regulation_of_eIF4_and_p70S6K_Signaling	0.348330429732869
Oxidative_Ethanol_Degradation_III	Assembly_of_RNA_Polymerase_II_Complex	0.345792682926829
Oxidative_Ethanol_Degradation_III	Calcium_Signaling	0.344706736353078
Oxidative_Ethanol_Degradation_III	Cardiac__-adrenergic_Signaling	0.344706736353078
Oxidative_Ethanol_Degradation_III	CXCR4_Signaling	0.347889082462253
Oxidative_Ethanol_Degradation_III	Fatty_Acid__-oxidation	0.344735772357724
Oxidative_Ethanol_Degradation_III	IL-1_Signaling	0.344706736353078
Oxidative_Ethanol_Degradation_III	Nitric_Oxide_Signaling_in_the_Cardiovascular_System	0.344706736353078
Oxidative_Ethanol_Degradation_III	Oncostatin_M_Signaling	0.345499419279907
Oxidative_Ethanol_Degradation_III	Phototransduction_Pathway	0.345891405342625
Oxidative_Ethanol_Degradation_III	Role_of_CHK_Proteins_in_Cell_Cycle_Checkpoint_Control	0.345891405342625
Putrescine_Degradation_III	Ethanol_Degradation_II	0.341292102206736
Putrescine_Degradation_III	Histamine_Degradation	0.337497096399535
Putrescine_Degradation_III	Noradrenaline_and_Adrenaline_Degradation	0.335641025641026
Putrescine_Degradation_III	Mitotic_Roles_of_Polo-Like_Kinase	0.346428571428571
Putrescine_Degradation_III	Aryl_Hydrocarbon_Receptor_Signaling	0.321286426987646
Putrescine_Degradation_III	Cellular_Effects_of_Sildenafil_(Viagra)	0.340641695702671
Putrescine_Degradation_III	Dopamine_Degradation	0.339851916376307
Putrescine_Degradation_III	Triacylglycerol_Degradation	0.341292102206736
Putrescine_Degradation_III	Axonal_Guidance_Signaling	0.35002442002442
Putrescine_Degradation_III	Mitochondrial_Dysfunction	0.343487224157956
Putrescine_Degradation_III	Phenylalanine_Degradation_IV_(Mammalian,_via_Side_Chain)	0.346443089430894
Putrescine_Degradation_III	Colorectal_Cancer_Metastasis_Signaling	0.340641695702671
Putrescine_Degradation_III	eNOS_Signaling	0.340641695702671
Putrescine_Degradation_III	Fatty_Acid__-oxidation_I	0.342105110336818
Putrescine_Degradation_III	Gluconeogenesis_I	0.351471306471306
Putrescine_Degradation_III	Glycolysis_I	0.351471306471306
Putrescine_Degradation_III	HIF1__Signaling	0.344044715447154
Putrescine_Degradation_III	Coagulation_System	0.346443089430894
Putrescine_Degradation_III	Extrinsic_Prothrombin_Activation_Pathway	0.344706736353078
Putrescine_Degradation_III	mTOR_Signaling	0.348330429732869
Putrescine_Degradation_III	PI3K/AKT_Signaling	0.347090592334495
Putrescine_Degradation_III	Regulation_of_eIF4_and_p70S6K_Signaling	0.348330429732869
Putrescine_Degradation_III	Assembly_of_RNA_Polymerase_II_Complex	0.345792682926829
Putrescine_Degradation_III	Calcium_Signaling	0.344706736353078
Putrescine_Degradation_III	Cardiac__-adrenergic_Signaling	0.344706736353078
Putrescine_Degradation_III	CXCR4_Signaling	0.347889082462253
Putrescine_Degradation_III	Fatty_Acid__-oxidation	0.344735772357724
Putrescine_Degradation_III	IL-1_Signaling	0.344706736353078
Putrescine_Degradation_III	Nitric_Oxide_Signaling_in_the_Cardiovascular_System	0.344706736353078
Putrescine_Degradation_III	Oncostatin_M_Signaling	0.345499419279907
Putrescine_Degradation_III	Phototransduction_Pathway	0.345891405342625
Putrescine_Degradation_III	Role_of_CHK_Proteins_in_Cell_Cycle_Checkpoint_Control	0.345891405342625
Ethanol_Degradation_II	Histamine_Degradation	0.337497096399535
Ethanol_Degradation_II	Noradrenaline_and_Adrenaline_Degradation	0.335641025641026
Ethanol_Degradation_II	Mitotic_Roles_of_Polo-Like_Kinase	0.346428571428571
Ethanol_Degradation_II	Aryl_Hydrocarbon_Receptor_Signaling	0.321286426987646
Ethanol_Degradation_II	Cellular_Effects_of_Sildenafil_(Viagra)	0.340641695702671
Ethanol_Degradation_II	Dopamine_Degradation	0.339851916376307
Ethanol_Degradation_II	Triacylglycerol_Degradation	0.341292102206736
Ethanol_Degradation_II	Axonal_Guidance_Signaling	0.35002442002442
Ethanol_Degradation_II	Mitochondrial_Dysfunction	0.343487224157956
Ethanol_Degradation_II	Phenylalanine_Degradation_IV_(Mammalian,_via_Side_Chain)	0.346443089430894
Ethanol_Degradation_II	Colorectal_Cancer_Metastasis_Signaling	0.340641695702671
Ethanol_Degradation_II	eNOS_Signaling	0.340641695702671
Ethanol_Degradation_II	Fatty_Acid__-oxidation_I	0.342105110336818
Ethanol_Degradation_II	Gluconeogenesis_I	0.351471306471306
Ethanol_Degradation_II	Glycolysis_I	0.351471306471306
Ethanol_Degradation_II	HIF1__Signaling	0.344044715447154
Ethanol_Degradation_II	Coagulation_System	0.346443089430894
Ethanol_Degradation_II	Extrinsic_Prothrombin_Activation_Pathway	0.344706736353078
Ethanol_Degradation_II	mTOR_Signaling	0.348330429732869
Ethanol_Degradation_II	PI3K/AKT_Signaling	0.347090592334495
Ethanol_Degradation_II	Regulation_of_eIF4_and_p70S6K_Signaling	0.348330429732869
Ethanol_Degradation_II	Assembly_of_RNA_Polymerase_II_Complex	0.345792682926829
Ethanol_Degradation_II	Calcium_Signaling	0.344706736353078
Ethanol_Degradation_II	Cardiac__-adrenergic_Signaling	0.344706736353078
Ethanol_Degradation_II	CXCR4_Signaling	0.347889082462253
Ethanol_Degradation_II	Fatty_Acid__-oxidation	0.344735772357724
Ethanol_Degradation_II	IL-1_Signaling	0.344706736353078
Ethanol_Degradation_II	Nitric_Oxide_Signaling_in_the_Cardiovascular_System	0.344706736353078
Ethanol_Degradation_II	Oncostatin_M_Signaling	0.345499419279907
Ethanol_Degradation_II	Phototransduction_Pathway	0.345891405342625
Ethanol_Degradation_II	Role_of_CHK_Proteins_in_Cell_Cycle_Checkpoint_Control	0.345891405342625
Histamine_Degradation	Noradrenaline_and_Adrenaline_Degradation	0.330949328449328
Histamine_Degradation	Mitotic_Roles_of_Polo-Like_Kinase	0.34243894993895
Histamine_Degradation	Aryl_Hydrocarbon_Receptor_Signaling	0.316366276000422
Histamine_Degradation	Cellular_Effects_of_Sildenafil_(Viagra)	0.337273519163763
Histamine_Degradation	Dopamine_Degradation	0.336018679829655
Histamine_Degradation	Triacylglycerol_Degradation	0.337497096399535
Histamine_Degradation	Axonal_Guidance_Signaling	0.346214896214896
Histamine_Degradation	Mitochondrial_Dysfunction	0.339692218350755
Histamine_Degradation	Phenylalanine_Degradation_IV_(Mammalian,_via_Side_Chain)	0.343657084785134
Histamine_Degradation	Colorectal_Cancer_Metastasis_Signaling	0.337273519163763
Histamine_Degradation	eNOS_Signaling	0.337273519163763
Histamine_Degradation	Fatty_Acid__-oxidation_I	0.338310104529617
Histamine_Degradation	Gluconeogenesis_I	0.347481684981685
Histamine_Degradation	Glycolysis_I	0.347481684981685
Histamine_Degradation	HIF1__Signaling	0.340249709639954
Histamine_Degradation	Coagulation_System	0.343657084785134
Histamine_Degradation	Extrinsic_Prothrombin_Activation_Pathway	0.341010452961672
Histamine_Degradation	mTOR_Signaling	0.344535423925668
Histamine_Degradation	PI3K/AKT_Signaling	0.343295586527294
Histamine_Degradation	Regulation_of_eIF4_and_p70S6K_Signaling	0.344535423925668
Histamine_Degradation	Assembly_of_RNA_Polymerase_II_Complex	0.341997677119628
Histamine_Degradation	Calcium_Signaling	0.341010452961672
Histamine_Degradation	Cardiac__-adrenergic_Signaling	0.341010452961672
Histamine_Degradation	CXCR4_Signaling	0.344166666666667
Histamine_Degradation	Fatty_Acid__-oxidation	0.340940766550523
Histamine_Degradation	IL-1_Signaling	0.341010452961672
Histamine_Degradation	Nitric_Oxide_Signaling_in_the_Cardiovascular_System	0.341010452961672
Histamine_Degradation	Oncostatin_M_Signaling	0.341704413472706
Histamine_Degradation	Phototransduction_Pathway	0.342096399535424
Histamine_Degradation	Role_of_CHK_Proteins_in_Cell_Cycle_Checkpoint_Control	0.342096399535424
Noradrenaline_and_Adrenaline_Degradation	Mitotic_Roles_of_Polo-Like_Kinase	0.340625602467708
Noradrenaline_and_Adrenaline_Degradation	Aryl_Hydrocarbon_Receptor_Signaling	0.313006854256854
Noradrenaline_and_Adrenaline_Degradation	Cellular_Effects_of_Sildenafil_(Viagra)	0.333870573870574
Noradrenaline_and_Adrenaline_Degradation	Dopamine_Degradation	0.328022995522996
Noradrenaline_and_Adrenaline_Degradation	Triacylglycerol_Degradation	0.335641025641026
Noradrenaline_and_Adrenaline_Degradation	Axonal_Guidance_Signaling	0.343360002570529
Noradrenaline_and_Adrenaline_Degradation	Mitochondrial_Dysfunction	0.338910256410256
Noradrenaline_and_Adrenaline_Degradation	Phenylalanine_Degradation_IV_(Mammalian,_via_Side_Chain)	0.340289987789988
Noradrenaline_and_Adrenaline_Degradation	Colorectal_Cancer_Metastasis_Signaling	0.333870573870574
Noradrenaline_and_Adrenaline_Degradation	eNOS_Signaling	0.333870573870574
Noradrenaline_and_Adrenaline_Degradation	Fatty_Acid__-oxidation_I	0.336495726495726
Noradrenaline_and_Adrenaline_Degradation	Gluconeogenesis_I	0.346508900456269
Noradrenaline_and_Adrenaline_Degradation	Glycolysis_I	0.346508900456269
Noradrenaline_and_Adrenaline_Degradation	HIF1__Signaling	0.340737179487179
Noradrenaline_and_Adrenaline_Degradation	Coagulation_System	0.340289987789988
Noradrenaline_and_Adrenaline_Degradation	Extrinsic_Prothrombin_Activation_Pathway	0.338388278388278
Noradrenaline_and_Adrenaline_Degradation	mTOR_Signaling	0.342809829059829
Noradrenaline_and_Adrenaline_Degradation	PI3K/AKT_Signaling	0.341277472527472
Noradrenaline_and_Adrenaline_Degradation	Regulation_of_eIF4_and_p70S6K_Signaling	0.342809829059829
Noradrenaline_and_Adrenaline_Degradation	Assembly_of_RNA_Polymerase_II_Complex	0.33705574912892
Noradrenaline_and_Adrenaline_Degradation	Calcium_Signaling	0.338388278388278
Noradrenaline_and_Adrenaline_Degradation	Cardiac__-adrenergic_Signaling	0.338388278388278
Noradrenaline_and_Adrenaline_Degradation	CXCR4_Signaling	0.341717032967033
Noradrenaline_and_Adrenaline_Degradation	Fatty_Acid__-oxidation	0.339580280830281
Noradrenaline_and_Adrenaline_Degradation	IL-1_Signaling	0.338388278388278
Noradrenaline_and_Adrenaline_Degradation	Nitric_Oxide_Signaling_in_the_Cardiovascular_System	0.338388278388278
Noradrenaline_and_Adrenaline_Degradation	Oncostatin_M_Signaling	0.341025641025641
Noradrenaline_and_Adrenaline_Degradation	Phototransduction_Pathway	0.340177045177045
Noradrenaline_and_Adrenaline_Degradation	Role_of_CHK_Proteins_in_Cell_Cycle_Checkpoint_Control	0.340177045177045
Mitotic_Roles_of_Polo-Like_Kinase	Aryl_Hydrocarbon_Receptor_Signaling	0.333465192215192
Mitotic_Roles_of_Polo-Like_Kinase	Cellular_Effects_of_Sildenafil_(Viagra)	0.346086691086691
Mitotic_Roles_of_Polo-Like_Kinase	Dopamine_Degradation	0.345946275946276
Mitotic_Roles_of_Polo-Like_Kinase	Triacylglycerol_Degradation	0.346428571428571
Mitotic_Roles_of_Polo-Like_Kinase	Axonal_Guidance_Signaling	0.356509864404601
Mitotic_Roles_of_Polo-Like_Kinase	Mitochondrial_Dysfunction	0.351449938949939
Mitotic_Roles_of_Polo-Like_Kinase	Phenylalanine_Degradation_IV_(Mammalian,_via_Side_Chain)	0.352164224664225
Mitotic_Roles_of_Polo-Like_Kinase	Colorectal_Cancer_Metastasis_Signaling	0.346086691086691
Mitotic_Roles_of_Polo-Like_Kinase	eNOS_Signaling	0.346086691086691
Mitotic_Roles_of_Polo-Like_Kinase	Fatty_Acid__-oxidation_I	0.347283272283272
Mitotic_Roles_of_Polo-Like_Kinase	Gluconeogenesis_I	0.358550221708116
Mitotic_Roles_of_Polo-Like_Kinase	Glycolysis_I	0.358550221708116
Mitotic_Roles_of_Polo-Like_Kinase	HIF1__Signaling	0.349642857142857
Mitotic_Roles_of_Polo-Like_Kinase	Coagulation_System	0.352164224664225
Mitotic_Roles_of_Polo-Like_Kinase	Extrinsic_Prothrombin_Activation_Pathway	0.350680708180708
Mitotic_Roles_of_Polo-Like_Kinase	mTOR_Signaling	0.354532967032967
Mitotic_Roles_of_Polo-Like_Kinase	PI3K/AKT_Signaling	0.348452380952381
Mitotic_Roles_of_Polo-Like_Kinase	Regulation_of_eIF4_and_p70S6K_Signaling	0.354532967032967
Mitotic_Roles_of_Polo-Like_Kinase	Assembly_of_RNA_Polymerase_II_Complex	0.351480463980464
Mitotic_Roles_of_Polo-Like_Kinase	Calcium_Signaling	0.350680708180708
Mitotic_Roles_of_Polo-Like_Kinase	Cardiac__-adrenergic_Signaling	0.350680708180708
Mitotic_Roles_of_Polo-Like_Kinase	CXCR4_Signaling	0.353898046398046
Mitotic_Roles_of_Polo-Like_Kinase	Fatty_Acid__-oxidation	0.35004884004884
Mitotic_Roles_of_Polo-Like_Kinase	IL-1_Signaling	0.350680708180708
Mitotic_Roles_of_Polo-Like_Kinase	Nitric_Oxide_Signaling_in_the_Cardiovascular_System	0.350680708180708
Mitotic_Roles_of_Polo-Like_Kinase	Oncostatin_M_Signaling	0.351449938949939
Mitotic_Roles_of_Polo-Like_Kinase	Phototransduction_Pathway	0.351404151404151
Mitotic_Roles_of_Polo-Like_Kinase	Role_of_CHK_Proteins_in_Cell_Cycle_Checkpoint_Control	0.351404151404151
Aryl_Hydrocarbon_Receptor_Signaling	Cellular_Effects_of_Sildenafil_(Viagra)	0.322176380530039
Aryl_Hydrocarbon_Receptor_Signaling	Dopamine_Degradation	0.320728935698448
Aryl_Hydrocarbon_Receptor_Signaling	Triacylglycerol_Degradation	0.321286426987646
Aryl_Hydrocarbon_Receptor_Signaling	Axonal_Guidance_Signaling	0.333050976800977
Aryl_Hydrocarbon_Receptor_Signaling	Mitochondrial_Dysfunction	0.325651506352726
Aryl_Hydrocarbon_Receptor_Signaling	Phenylalanine_Degradation_IV_(Mammalian,_via_Side_Chain)	0.326681316650829
Aryl_Hydrocarbon_Receptor_Signaling	Colorectal_Cancer_Metastasis_Signaling	0.322176380530039
Aryl_Hydrocarbon_Receptor_Signaling	eNOS_Signaling	0.322176380530039
Aryl_Hydrocarbon_Receptor_Signaling	Fatty_Acid__-oxidation_I	0.322099435117728
Aryl_Hydrocarbon_Receptor_Signaling	Gluconeogenesis_I	0.334640405890406
Aryl_Hydrocarbon_Receptor_Signaling	Glycolysis_I	0.334640405890406
Aryl_Hydrocarbon_Receptor_Signaling	HIF1__Signaling	0.324478935698448
Aryl_Hydrocarbon_Receptor_Signaling	Coagulation_System	0.326681316650829
Aryl_Hydrocarbon_Receptor_Signaling	Extrinsic_Prothrombin_Activation_Pathway	0.327115404920283
Aryl_Hydrocarbon_Receptor_Signaling	mTOR_Signaling	0.330129782141977
Aryl_Hydrocarbon_Receptor_Signaling	PI3K/AKT_Signaling	0.329824904093197
Aryl_Hydrocarbon_Receptor_Signaling	Regulation_of_eIF4_and_p70S6K_Signaling	0.330129782141977
Aryl_Hydrocarbon_Receptor_Signaling	Assembly_of_RNA_Polymerase_II_Complex	0.326226903178123
Aryl_Hydrocarbon_Receptor_Signaling	Calcium_Signaling	0.327115404920283
Aryl_Hydrocarbon_Receptor_Signaling	Cardiac__-adrenergic_Signaling	0.327115404920283
Aryl_Hydrocarbon_Receptor_Signaling	CXCR4_Signaling	0.329634146341463
Aryl_Hydrocarbon_Receptor_Signaling	Fatty_Acid__-oxidation	0.324669121528878
Aryl_Hydrocarbon_Receptor_Signaling	IL-1_Signaling	0.327115404920283
Aryl_Hydrocarbon_Receptor_Signaling	Nitric_Oxide_Signaling_in_the_Cardiovascular_System	0.327115404920283
Aryl_Hydrocarbon_Receptor_Signaling	Oncostatin_M_Signaling	0.326769392531588
Aryl_Hydrocarbon_Receptor_Signaling	Phototransduction_Pathway	0.326028006546299
Aryl_Hydrocarbon_Receptor_Signaling	Role_of_CHK_Proteins_in_Cell_Cycle_Checkpoint_Control	0.326028006546299
Cellular_Effects_of_Sildenafil_(Viagra)	Dopamine_Degradation	0.339201509872242
Cellular_Effects_of_Sildenafil_(Viagra)	Triacylglycerol_Degradation	0.340641695702671
Cellular_Effects_of_Sildenafil_(Viagra)	Axonal_Guidance_Signaling	0.349832112332112
Cellular_Effects_of_Sildenafil_(Viagra)	Mitochondrial_Dysfunction	0.342836817653891
Cellular_Effects_of_Sildenafil_(Viagra)	Phenylalanine_Degradation_IV_(Mammalian,_via_Side_Chain)	0.345792682926829
Cellular_Effects_of_Sildenafil_(Viagra)	Colorectal_Cancer_Metastasis_Signaling	0.339991289198606
Cellular_Effects_of_Sildenafil_(Viagra)	eNOS_Signaling	0.339991289198606
Cellular_Effects_of_Sildenafil_(Viagra)	Fatty_Acid__-oxidation_I	0.341454703832753
Cellular_Effects_of_Sildenafil_(Viagra)	Gluconeogenesis_I	0.350894383394383
Cellular_Effects_of_Sildenafil_(Viagra)	Glycolysis_I	0.350894383394383
Cellular_Effects_of_Sildenafil_(Viagra)	HIF1__Signaling	0.343231707317073
Cellular_Effects_of_Sildenafil_(Viagra)	Coagulation_System	0.345792682926829
Cellular_Effects_of_Sildenafil_(Viagra)	Extrinsic_Prothrombin_Activation_Pathway	0.344361207897793
Cellular_Effects_of_Sildenafil_(Viagra)	mTOR_Signaling	0.347720673635308
Cellular_Effects_of_Sildenafil_(Viagra)	PI3K/AKT_Signaling	0.34654181184669
Cellular_Effects_of_Sildenafil_(Viagra)	Regulation_of_eIF4_and_p70S6K_Signaling	0.347720673635308
Cellular_Effects_of_Sildenafil_(Viagra)	Assembly_of_RNA_Polymerase_II_Complex	0.344979674796748
Cellular_Effects_of_Sildenafil_(Viagra)	Calcium_Signaling	0.344361207897793
Cellular_Effects_of_Sildenafil_(Viagra)	Cardiac__-adrenergic_Signaling	0.344361207897793
Cellular_Effects_of_Sildenafil_(Viagra)	CXCR4_Signaling	0.347401277584204
Cellular_Effects_of_Sildenafil_(Viagra)	Fatty_Acid__-oxidation	0.343780487804878
Cellular_Effects_of_Sildenafil_(Viagra)	IL-1_Signaling	0.344361207897793
Cellular_Effects_of_Sildenafil_(Viagra)	Nitric_Oxide_Signaling_in_the_Cardiovascular_System	0.344361207897793
Cellular_Effects_of_Sildenafil_(Viagra)	Oncostatin_M_Signaling	0.344788037166086
Cellular_Effects_of_Sildenafil_(Viagra)	Phototransduction_Pathway	0.34524099883856
Cellular_Effects_of_Sildenafil_(Viagra)	Role_of_CHK_Proteins_in_Cell_Cycle_Checkpoint_Control	0.34524099883856
Dopamine_Degradation	Triacylglycerol_Degradation	0.339851916376307
Dopamine_Degradation	Axonal_Guidance_Signaling	0.348724053724054
Dopamine_Degradation	Mitochondrial_Dysfunction	0.343022648083624
Dopamine_Degradation	Phenylalanine_Degradation_IV_(Mammalian,_via_Side_Chain)	0.346482288037166
Dopamine_Degradation	Colorectal_Cancer_Metastasis_Signaling	0.339201509872242
Dopamine_Degradation	eNOS_Signaling	0.339201509872242
Dopamine_Degradation	Fatty_Acid__-oxidation_I	0.340664924506388
Dopamine_Degradation	Gluconeogenesis_I	0.350989010989011
Dopamine_Degradation	Glycolysis_I	0.350989010989011
Dopamine_Degradation	HIF1__Signaling	0.342909407665505
Dopamine_Degradation	Coagulation_System	0.346482288037166
Dopamine_Degradation	Extrinsic_Prothrombin_Activation_Pathway	0.343510452961672
Dopamine_Degradation	mTOR_Signaling	0.34746806039489
Dopamine_Degradation	PI3K/AKT_Signaling	0.346228222996516
Dopamine_Degradation	Regulation_of_eIF4_and_p70S6K_Signaling	0.34746806039489
Dopamine_Degradation	Assembly_of_RNA_Polymerase_II_Complex	0.34465737514518
Dopamine_Degradation	Calcium_Signaling	0.343510452961672
Dopamine_Degradation	Cardiac__-adrenergic_Signaling	0.343510452961672
Dopamine_Degradation	CXCR4_Signaling	0.3467131242741
Dopamine_Degradation	Fatty_Acid__-oxidation	0.343295586527294
Dopamine_Degradation	IL-1_Signaling	0.343510452961672
Dopamine_Degradation	Nitric_Oxide_Signaling_in_the_Cardiovascular_System	0.343510452961672
Dopamine_Degradation	Oncostatin_M_Signaling	0.345034843205575
Dopamine_Degradation	Phototransduction_Pathway	0.344593495934959
Dopamine_Degradation	Role_of_CHK_Proteins_in_Cell_Cycle_Checkpoint_Control	0.344593495934959
Triacylglycerol_Degradation	Axonal_Guidance_Signaling	0.35002442002442
Triacylglycerol_Degradation	Mitochondrial_Dysfunction	0.343487224157956
Triacylglycerol_Degradation	Phenylalanine_Degradation_IV_(Mammalian,_via_Side_Chain)	0.346443089430894
Triacylglycerol_Degradation	Colorectal_Cancer_Metastasis_Signaling	0.340641695702671
Triacylglycerol_Degradation	eNOS_Signaling	0.340641695702671
Triacylglycerol_Degradation	Fatty_Acid__-oxidation_I	0.342105110336818
Triacylglycerol_Degradation	Gluconeogenesis_I	0.351471306471306
Triacylglycerol_Degradation	Glycolysis_I	0.351471306471306
Triacylglycerol_Degradation	HIF1__Signaling	0.344044715447154
Triacylglycerol_Degradation	Coagulation_System	0.346443089430894
Triacylglycerol_Degradation	Extrinsic_Prothrombin_Activation_Pathway	0.344706736353078
Triacylglycerol_Degradation	mTOR_Signaling	0.348330429732869
Triacylglycerol_Degradation	PI3K/AKT_Signaling	0.347090592334495
Triacylglycerol_Degradation	Regulation_of_eIF4_and_p70S6K_Signaling	0.348330429732869
Triacylglycerol_Degradation	Assembly_of_RNA_Polymerase_II_Complex	0.345792682926829
Triacylglycerol_Degradation	Calcium_Signaling	0.344706736353078
Triacylglycerol_Degradation	Cardiac__-adrenergic_Signaling	0.344706736353078
Triacylglycerol_Degradation	CXCR4_Signaling	0.347889082462253
Triacylglycerol_Degradation	Fatty_Acid__-oxidation	0.344735772357724
Triacylglycerol_Degradation	IL-1_Signaling	0.344706736353078
Triacylglycerol_Degradation	Nitric_Oxide_Signaling_in_the_Cardiovascular_System	0.344706736353078
Triacylglycerol_Degradation	Oncostatin_M_Signaling	0.345499419279907
Triacylglycerol_Degradation	Phototransduction_Pathway	0.345891405342625
Triacylglycerol_Degradation	Role_of_CHK_Proteins_in_Cell_Cycle_Checkpoint_Control	0.345891405342625
Axonal_Guidance_Signaling	Mitochondrial_Dysfunction	0.352652625152625
Axonal_Guidance_Signaling	Phenylalanine_Degradation_IV_(Mammalian,_via_Side_Chain)	0.355579975579976
Axonal_Guidance_Signaling	Colorectal_Cancer_Metastasis_Signaling	0.349832112332112
Axonal_Guidance_Signaling	eNOS_Signaling	0.349832112332112
Axonal_Guidance_Signaling	Fatty_Acid__-oxidation_I	0.350879120879121
Axonal_Guidance_Signaling	Gluconeogenesis_I	0.361413148255254
Axonal_Guidance_Signaling	Glycolysis_I	0.361413148255254
Axonal_Guidance_Signaling	HIF1__Signaling	0.35295177045177
Axonal_Guidance_Signaling	Coagulation_System	0.355579975579976
Axonal_Guidance_Signaling	Extrinsic_Prothrombin_Activation_Pathway	0.354426129426129
Axonal_Guidance_Signaling	mTOR_Signaling	0.3577442002442
Axonal_Guidance_Signaling	PI3K/AKT_Signaling	0.356547619047619
Axonal_Guidance_Signaling	Regulation_of_eIF4_and_p70S6K_Signaling	0.3577442002442
Axonal_Guidance_Signaling	Assembly_of_RNA_Polymerase_II_Complex	0.354789377289377
Axonal_Guidance_Signaling	Calcium_Signaling	0.354426129426129
Axonal_Guidance_Signaling	Cardiac__-adrenergic_Signaling	0.354426129426129
Axonal_Guidance_Signaling	CXCR4_Signaling	0.351771196283391
Axonal_Guidance_Signaling	Fatty_Acid__-oxidation	0.353464590964591
Axonal_Guidance_Signaling	IL-1_Signaling	0.354426129426129
Axonal_Guidance_Signaling	Nitric_Oxide_Signaling_in_the_Cardiovascular_System	0.354426129426129
Axonal_Guidance_Signaling	Oncostatin_M_Signaling	0.354661172161172
Axonal_Guidance_Signaling	Phototransduction_Pathway	0.354966422466423
Axonal_Guidance_Signaling	Role_of_CHK_Proteins_in_Cell_Cycle_Checkpoint_Control	0.354966422466423
Mitochondrial_Dysfunction	Phenylalanine_Degradation_IV_(Mammalian,_via_Side_Chain)	0.348943089430894
Mitochondrial_Dysfunction	Colorectal_Cancer_Metastasis_Signaling	0.342836817653891
Mitochondrial_Dysfunction	eNOS_Signaling	0.342836817653891
Mitochondrial_Dysfunction	Fatty_Acid__-oxidation_I	0.344300232288037
Mitochondrial_Dysfunction	Gluconeogenesis_I	0.354377289377289
Mitochondrial_Dysfunction	Glycolysis_I	0.354377289377289
Mitochondrial_Dysfunction	HIF1__Signaling	0.346544715447154
Mitochondrial_Dysfunction	Coagulation_System	0.348943089430894
Mitochondrial_Dysfunction	Extrinsic_Prothrombin_Activation_Pathway	0.347206736353078
Mitochondrial_Dysfunction	mTOR_Signaling	0.350932055749129
Mitochondrial_Dysfunction	PI3K/AKT_Signaling	0.349997096399535
Mitochondrial_Dysfunction	Regulation_of_eIF4_and_p70S6K_Signaling	0.350932055749129
Mitochondrial_Dysfunction	Assembly_of_RNA_Polymerase_II_Complex	0.348292682926829
Mitochondrial_Dysfunction	Calcium_Signaling	0.347206736353078
Mitochondrial_Dysfunction	Cardiac__-adrenergic_Signaling	0.347206736353078
Mitochondrial_Dysfunction	CXCR4_Signaling	0.350389082462253
Mitochondrial_Dysfunction	Fatty_Acid__-oxidation	0.346930894308943
Mitochondrial_Dysfunction	IL-1_Signaling	0.347206736353078
Mitochondrial_Dysfunction	Nitric_Oxide_Signaling_in_the_Cardiovascular_System	0.347206736353078
Mitochondrial_Dysfunction	Oncostatin_M_Signaling	0.348304297328688
Mitochondrial_Dysfunction	Phototransduction_Pathway	0.348228803716609
Mitochondrial_Dysfunction	Role_of_CHK_Proteins_in_Cell_Cycle_Checkpoint_Control	0.348228803716609
Phenylalanine_Degradation_IV_(Mammalian,_via_Side_Chain)	Colorectal_Cancer_Metastasis_Signaling	0.345792682926829
Phenylalanine_Degradation_IV_(Mammalian,_via_Side_Chain)	eNOS_Signaling	0.345792682926829
Phenylalanine_Degradation_IV_(Mammalian,_via_Side_Chain)	Fatty_Acid__-oxidation_I	0.347256097560976
Phenylalanine_Degradation_IV_(Mammalian,_via_Side_Chain)	Gluconeogenesis_I	0.35720695970696
Phenylalanine_Degradation_IV_(Mammalian,_via_Side_Chain)	Glycolysis_I	0.35720695970696
Phenylalanine_Degradation_IV_(Mammalian,_via_Side_Chain)	HIF1__Signaling	0.349500580720093
Phenylalanine_Degradation_IV_(Mammalian,_via_Side_Chain)	Coagulation_System	0.352203832752613
Phenylalanine_Degradation_IV_(Mammalian,_via_Side_Chain)	Extrinsic_Prothrombin_Activation_Pathway	0.350060975609756
Phenylalanine_Degradation_IV_(Mammalian,_via_Side_Chain)	mTOR_Signaling	0.353786295005807
Phenylalanine_Degradation_IV_(Mammalian,_via_Side_Chain)	PI3K/AKT_Signaling	0.352546457607433
Phenylalanine_Degradation_IV_(Mammalian,_via_Side_Chain)	Regulation_of_eIF4_and_p70S6K_Signaling	0.353786295005807
Phenylalanine_Degradation_IV_(Mammalian,_via_Side_Chain)	Assembly_of_RNA_Polymerase_II_Complex	0.351085946573751
Phenylalanine_Degradation_IV_(Mammalian,_via_Side_Chain)	Calcium_Signaling	0.350060975609756
Phenylalanine_Degradation_IV_(Mammalian,_via_Side_Chain)	Cardiac__-adrenergic_Signaling	0.350060975609756
Phenylalanine_Degradation_IV_(Mammalian,_via_Side_Chain)	CXCR4_Signaling	0.353275261324042
Phenylalanine_Degradation_IV_(Mammalian,_via_Side_Chain)	Fatty_Acid__-oxidation	0.349886759581882
Phenylalanine_Degradation_IV_(Mammalian,_via_Side_Chain)	IL-1_Signaling	0.350060975609756
Phenylalanine_Degradation_IV_(Mammalian,_via_Side_Chain)	Nitric_Oxide_Signaling_in_the_Cardiovascular_System	0.350060975609756
Phenylalanine_Degradation_IV_(Mammalian,_via_Side_Chain)	Oncostatin_M_Signaling	0.350955284552845
Phenylalanine_Degradation_IV_(Mammalian,_via_Side_Chain)	Phototransduction_Pathway	0.351184668989547
Phenylalanine_Degradation_IV_(Mammalian,_via_Side_Chain)	Role_of_CHK_Proteins_in_Cell_Cycle_Checkpoint_Control	0.351184668989547
Colorectal_Cancer_Metastasis_Signaling	eNOS_Signaling	0.339991289198606
Colorectal_Cancer_Metastasis_Signaling	Fatty_Acid__-oxidation_I	0.341454703832753
Colorectal_Cancer_Metastasis_Signaling	Gluconeogenesis_I	0.350894383394383
Colorectal_Cancer_Metastasis_Signaling	Glycolysis_I	0.350894383394383
Colorectal_Cancer_Metastasis_Signaling	HIF1__Signaling	0.343231707317073
Colorectal_Cancer_Metastasis_Signaling	Coagulation_System	0.345792682926829
Colorectal_Cancer_Metastasis_Signaling	Extrinsic_Prothrombin_Activation_Pathway	0.344361207897793
Colorectal_Cancer_Metastasis_Signaling	mTOR_Signaling	0.347720673635308
Colorectal_Cancer_Metastasis_Signaling	PI3K/AKT_Signaling	0.34654181184669
Colorectal_Cancer_Metastasis_Signaling	Regulation_of_eIF4_and_p70S6K_Signaling	0.347720673635308
Colorectal_Cancer_Metastasis_Signaling	Assembly_of_RNA_Polymerase_II_Complex	0.344979674796748
Colorectal_Cancer_Metastasis_Signaling	Calcium_Signaling	0.344361207897793
Colorectal_Cancer_Metastasis_Signaling	Cardiac__-adrenergic_Signaling	0.344361207897793
Colorectal_Cancer_Metastasis_Signaling	CXCR4_Signaling	0.347401277584204
Colorectal_Cancer_Metastasis_Signaling	Fatty_Acid__-oxidation	0.343780487804878
Colorectal_Cancer_Metastasis_Signaling	IL-1_Signaling	0.344361207897793
Colorectal_Cancer_Metastasis_Signaling	Nitric_Oxide_Signaling_in_the_Cardiovascular_System	0.344361207897793
Colorectal_Cancer_Metastasis_Signaling	Oncostatin_M_Signaling	0.344788037166086
Colorectal_Cancer_Metastasis_Signaling	Phototransduction_Pathway	0.34524099883856
Colorectal_Cancer_Metastasis_Signaling	Role_of_CHK_Proteins_in_Cell_Cycle_Checkpoint_Control	0.34524099883856
eNOS_Signaling	Fatty_Acid__-oxidation_I	0.341454703832753
eNOS_Signaling	Gluconeogenesis_I	0.350894383394383
eNOS_Signaling	Glycolysis_I	0.350894383394383
eNOS_Signaling	HIF1__Signaling	0.343231707317073
eNOS_Signaling	Coagulation_System	0.345792682926829
eNOS_Signaling	Extrinsic_Prothrombin_Activation_Pathway	0.344361207897793
eNOS_Signaling	mTOR_Signaling	0.347720673635308
eNOS_Signaling	PI3K/AKT_Signaling	0.34654181184669
eNOS_Signaling	Regulation_of_eIF4_and_p70S6K_Signaling	0.347720673635308
eNOS_Signaling	Assembly_of_RNA_Polymerase_II_Complex	0.344979674796748
eNOS_Signaling	Calcium_Signaling	0.344361207897793
eNOS_Signaling	Cardiac__-adrenergic_Signaling	0.344361207897793
eNOS_Signaling	CXCR4_Signaling	0.347401277584204
eNOS_Signaling	Fatty_Acid__-oxidation	0.343780487804878
eNOS_Signaling	IL-1_Signaling	0.344361207897793
eNOS_Signaling	Nitric_Oxide_Signaling_in_the_Cardiovascular_System	0.344361207897793
eNOS_Signaling	Oncostatin_M_Signaling	0.344788037166086
eNOS_Signaling	Phototransduction_Pathway	0.34524099883856
eNOS_Signaling	Role_of_CHK_Proteins_in_Cell_Cycle_Checkpoint_Control	0.34524099883856
Fatty_Acid__-oxidation_I	Gluconeogenesis_I	0.352326007326007
Fatty_Acid__-oxidation_I	Glycolysis_I	0.352326007326007
Fatty_Acid__-oxidation_I	HIF1__Signaling	0.344857723577236
Fatty_Acid__-oxidation_I	Coagulation_System	0.347256097560976
Fatty_Acid__-oxidation_I	Extrinsic_Prothrombin_Activation_Pathway	0.345519744483159
Fatty_Acid__-oxidation_I	mTOR_Signaling	0.34914343786295
Fatty_Acid__-oxidation_I	PI3K/AKT_Signaling	0.347903600464576
Fatty_Acid__-oxidation_I	Regulation_of_eIF4_and_p70S6K_Signaling	0.34914343786295
Fatty_Acid__-oxidation_I	Assembly_of_RNA_Polymerase_II_Complex	0.346605691056911
Fatty_Acid__-oxidation_I	Calcium_Signaling	0.345519744483159
Fatty_Acid__-oxidation_I	Cardiac__-adrenergic_Signaling	0.345519744483159
Fatty_Acid__-oxidation_I	CXCR4_Signaling	0.348702090592335
Fatty_Acid__-oxidation_I	Fatty_Acid__-oxidation	0.345548780487805
Fatty_Acid__-oxidation_I	IL-1_Signaling	0.345519744483159
Fatty_Acid__-oxidation_I	Nitric_Oxide_Signaling_in_the_Cardiovascular_System	0.345519744483159
Fatty_Acid__-oxidation_I	Oncostatin_M_Signaling	0.346312427409988
Fatty_Acid__-oxidation_I	Phototransduction_Pathway	0.346704413472706
Fatty_Acid__-oxidation_I	Role_of_CHK_Proteins_in_Cell_Cycle_Checkpoint_Control	0.346704413472706
Gluconeogenesis_I	Glycolysis_I	0.363858363858364
Gluconeogenesis_I	HIF1__Signaling	0.354685592185592
Gluconeogenesis_I	Coagulation_System	0.35720695970696
Gluconeogenesis_I	Extrinsic_Prothrombin_Activation_Pathway	0.3554884004884
Gluconeogenesis_I	mTOR_Signaling	0.359575702075702
Gluconeogenesis_I	PI3K/AKT_Signaling	0.358272283272283
Gluconeogenesis_I	Regulation_of_eIF4_and_p70S6K_Signaling	0.353249128919861
Gluconeogenesis_I	Assembly_of_RNA_Polymerase_II_Complex	0.356523199023199
Gluconeogenesis_I	Calcium_Signaling	0.3554884004884
Gluconeogenesis_I	Cardiac__-adrenergic_Signaling	0.3554884004884
Gluconeogenesis_I	CXCR4_Signaling	0.358791208791209
Gluconeogenesis_I	Fatty_Acid__-oxidation	0.355091575091575
Gluconeogenesis_I	IL-1_Signaling	0.3554884004884
Gluconeogenesis_I	Nitric_Oxide_Signaling_in_the_Cardiovascular_System	0.3554884004884
Gluconeogenesis_I	Oncostatin_M_Signaling	0.356492673992674
Gluconeogenesis_I	Phototransduction_Pathway	0.356446886446886
Gluconeogenesis_I	Role_of_CHK_Proteins_in_Cell_Cycle_Checkpoint_Control	0.356446886446886
Glycolysis_I	HIF1__Signaling	0.354685592185592
Glycolysis_I	Coagulation_System	0.35720695970696
Glycolysis_I	Extrinsic_Prothrombin_Activation_Pathway	0.3554884004884
Glycolysis_I	mTOR_Signaling	0.353249128919861
Glycolysis_I	PI3K/AKT_Signaling	0.358272283272283
Glycolysis_I	Regulation_of_eIF4_and_p70S6K_Signaling	0.359575702075702
Glycolysis_I	Assembly_of_RNA_Polymerase_II_Complex	0.356523199023199
Glycolysis_I	Calcium_Signaling	0.3554884004884
Glycolysis_I	Cardiac__-adrenergic_Signaling	0.3554884004884
Glycolysis_I	CXCR4_Signaling	0.358791208791209
Glycolysis_I	Fatty_Acid__-oxidation	0.355091575091575
Glycolysis_I	IL-1_Signaling	0.3554884004884
Glycolysis_I	Nitric_Oxide_Signaling_in_the_Cardiovascular_System	0.3554884004884
Glycolysis_I	Oncostatin_M_Signaling	0.356492673992674
Glycolysis_I	Phototransduction_Pathway	0.356446886446886
Glycolysis_I	Role_of_CHK_Proteins_in_Cell_Cycle_Checkpoint_Control	0.356446886446886
HIF1__Signaling	Coagulation_System	0.349500580720093
HIF1__Signaling	Extrinsic_Prothrombin_Activation_Pathway	0.347560975609756
HIF1__Signaling	mTOR_Signaling	0.351326945412311
HIF1__Signaling	PI3K/AKT_Signaling	0.350087108013937
HIF1__Signaling	Regulation_of_eIF4_and_p70S6K_Signaling	0.351326945412311
HIF1__Signaling	Assembly_of_RNA_Polymerase_II_Complex	0.348951800232288
HIF1__Signaling	Calcium_Signaling	0.347560975609756
HIF1__Signaling	Cardiac__-adrenergic_Signaling	0.347560975609756
HIF1__Signaling	CXCR4_Signaling	0.350775261324042
HIF1__Signaling	Fatty_Acid__-oxidation	0.347488385598142
HIF1__Signaling	IL-1_Signaling	0.347560975609756
HIF1__Signaling	Nitric_Oxide_Signaling_in_the_Cardiovascular_System	0.347560975609756
HIF1__Signaling	Oncostatin_M_Signaling	0.348556910569106
HIF1__Signaling	Phototransduction_Pathway	0.348745644599303
HIF1__Signaling	Role_of_CHK_Proteins_in_Cell_Cycle_Checkpoint_Control	0.348745644599303
Coagulation_System	Extrinsic_Prothrombin_Activation_Pathway	0.350060975609756
Coagulation_System	mTOR_Signaling	0.353786295005807
Coagulation_System	PI3K/AKT_Signaling	0.352546457607433
Coagulation_System	Regulation_of_eIF4_and_p70S6K_Signaling	0.353786295005807
Coagulation_System	Assembly_of_RNA_Polymerase_II_Complex	0.351085946573751
Coagulation_System	Calcium_Signaling	0.350060975609756
Coagulation_System	Cardiac__-adrenergic_Signaling	0.350060975609756
Coagulation_System	CXCR4_Signaling	0.353275261324042
Coagulation_System	Fatty_Acid__-oxidation	0.349886759581882
Coagulation_System	IL-1_Signaling	0.350060975609756
Coagulation_System	Nitric_Oxide_Signaling_in_the_Cardiovascular_System	0.350060975609756
Coagulation_System	Oncostatin_M_Signaling	0.350955284552845
Coagulation_System	Phototransduction_Pathway	0.351184668989547
Coagulation_System	Role_of_CHK_Proteins_in_Cell_Cycle_Checkpoint_Control	0.351184668989547
Extrinsic_Prothrombin_Activation_Pathway	mTOR_Signaling	0.352090592334495
Extrinsic_Prothrombin_Activation_Pathway	PI3K/AKT_Signaling	0.350911730545877
Extrinsic_Prothrombin_Activation_Pathway	Regulation_of_eIF4_and_p70S6K_Signaling	0.352090592334495
Extrinsic_Prothrombin_Activation_Pathway	Assembly_of_RNA_Polymerase_II_Complex	0.349308943089431
Extrinsic_Prothrombin_Activation_Pathway	Calcium_Signaling	0.34873112659698
Extrinsic_Prothrombin_Activation_Pathway	Cardiac__-adrenergic_Signaling	0.34873112659698
Extrinsic_Prothrombin_Activation_Pathway	CXCR4_Signaling	0.351771196283391
Extrinsic_Prothrombin_Activation_Pathway	Fatty_Acid__-oxidation	0.348048780487805
Extrinsic_Prothrombin_Activation_Pathway	IL-1_Signaling	0.34873112659698
Extrinsic_Prothrombin_Activation_Pathway	Nitric_Oxide_Signaling_in_the_Cardiovascular_System	0.34873112659698
Extrinsic_Prothrombin_Activation_Pathway	Oncostatin_M_Signaling	0.349157955865273
Extrinsic_Prothrombin_Activation_Pathway	Phototransduction_Pathway	0.349448315911731
Extrinsic_Prothrombin_Activation_Pathway	Role_of_CHK_Proteins_in_Cell_Cycle_Checkpoint_Control	0.349448315911731
mTOR_Signaling	PI3K/AKT_Signaling	0.354637049941928
mTOR_Signaling	Regulation_of_eIF4_and_p70S6K_Signaling	0.355876887340302
mTOR_Signaling	Assembly_of_RNA_Polymerase_II_Complex	0.353074912891986
mTOR_Signaling	Calcium_Signaling	0.352090592334495
mTOR_Signaling	Cardiac__-adrenergic_Signaling	0.352090592334495
mTOR_Signaling	CXCR4_Signaling	0.355293263646922
mTOR_Signaling	Fatty_Acid__-oxidation	0.351774099883856
mTOR_Signaling	IL-1_Signaling	0.352090592334495
mTOR_Signaling	Nitric_Oxide_Signaling_in_the_Cardiovascular_System	0.352090592334495
mTOR_Signaling	Oncostatin_M_Signaling	0.35294425087108
mTOR_Signaling	Phototransduction_Pathway	0.353103948896632
mTOR_Signaling	Role_of_CHK_Proteins_in_Cell_Cycle_Checkpoint_Control	0.353103948896632
PI3K/AKT_Signaling	Regulation_of_eIF4_and_p70S6K_Signaling	0.354637049941928
PI3K/AKT_Signaling	Assembly_of_RNA_Polymerase_II_Complex	0.351835075493612
PI3K/AKT_Signaling	Calcium_Signaling	0.350911730545877
PI3K/AKT_Signaling	Cardiac__-adrenergic_Signaling	0.350911730545877
PI3K/AKT_Signaling	CXCR4_Signaling	0.354094076655052
PI3K/AKT_Signaling	Fatty_Acid__-oxidation	0.350534262485482
PI3K/AKT_Signaling	IL-1_Signaling	0.350911730545877
PI3K/AKT_Signaling	Nitric_Oxide_Signaling_in_the_Cardiovascular_System	0.350911730545877
PI3K/AKT_Signaling	Oncostatin_M_Signaling	0.351704413472706
PI3K/AKT_Signaling	Phototransduction_Pathway	0.351864111498258
PI3K/AKT_Signaling	Role_of_CHK_Proteins_in_Cell_Cycle_Checkpoint_Control	0.351864111498258
Regulation_of_eIF4_and_p70S6K_Signaling	Assembly_of_RNA_Polymerase_II_Complex	0.353074912891986
Regulation_of_eIF4_and_p70S6K_Signaling	Calcium_Signaling	0.352090592334495
Regulation_of_eIF4_and_p70S6K_Signaling	Cardiac__-adrenergic_Signaling	0.352090592334495
Regulation_of_eIF4_and_p70S6K_Signaling	CXCR4_Signaling	0.355293263646922
Regulation_of_eIF4_and_p70S6K_Signaling	Fatty_Acid__-oxidation	0.351774099883856
Regulation_of_eIF4_and_p70S6K_Signaling	IL-1_Signaling	0.352090592334495
Regulation_of_eIF4_and_p70S6K_Signaling	Nitric_Oxide_Signaling_in_the_Cardiovascular_System	0.352090592334495
Regulation_of_eIF4_and_p70S6K_Signaling	Oncostatin_M_Signaling	0.35294425087108
Regulation_of_eIF4_and_p70S6K_Signaling	Phototransduction_Pathway	0.353103948896632
Regulation_of_eIF4_and_p70S6K_Signaling	Role_of_CHK_Proteins_in_Cell_Cycle_Checkpoint_Control	0.353103948896632
Assembly_of_RNA_Polymerase_II_Complex	Calcium_Signaling	0.349308943089431
Assembly_of_RNA_Polymerase_II_Complex	Cardiac__-adrenergic_Signaling	0.349308943089431
Assembly_of_RNA_Polymerase_II_Complex	CXCR4_Signaling	0.352523228803717
Assembly_of_RNA_Polymerase_II_Complex	Fatty_Acid__-oxidation	0.349236353077817
Assembly_of_RNA_Polymerase_II_Complex	IL-1_Signaling	0.349308943089431
Assembly_of_RNA_Polymerase_II_Complex	Nitric_Oxide_Signaling_in_the_Cardiovascular_System	0.349308943089431
Assembly_of_RNA_Polymerase_II_Complex	Oncostatin_M_Signaling	0.35030487804878
Assembly_of_RNA_Polymerase_II_Complex	Phototransduction_Pathway	0.350493612078978
Assembly_of_RNA_Polymerase_II_Complex	Role_of_CHK_Proteins_in_Cell_Cycle_Checkpoint_Control	0.350493612078978
Calcium_Signaling	Cardiac__-adrenergic_Signaling	0.34873112659698
Calcium_Signaling	CXCR4_Signaling	0.351771196283391
Calcium_Signaling	Fatty_Acid__-oxidation	0.348048780487805
Calcium_Signaling	IL-1_Signaling	0.34873112659698
Calcium_Signaling	Nitric_Oxide_Signaling_in_the_Cardiovascular_System	0.34873112659698
Calcium_Signaling	Oncostatin_M_Signaling	0.349157955865273
Calcium_Signaling	Phototransduction_Pathway	0.349448315911731
Calcium_Signaling	Role_of_CHK_Proteins_in_Cell_Cycle_Checkpoint_Control	0.349448315911731
Cardiac__-adrenergic_Signaling	CXCR4_Signaling	0.351771196283391
Cardiac__-adrenergic_Signaling	Fatty_Acid__-oxidation	0.348048780487805
Cardiac__-adrenergic_Signaling	IL-1_Signaling	0.34873112659698
Cardiac__-adrenergic_Signaling	Nitric_Oxide_Signaling_in_the_Cardiovascular_System	0.34873112659698
Cardiac__-adrenergic_Signaling	Oncostatin_M_Signaling	0.349157955865273
Cardiac__-adrenergic_Signaling	Phototransduction_Pathway	0.349448315911731
Cardiac__-adrenergic_Signaling	Role_of_CHK_Proteins_in_Cell_Cycle_Checkpoint_Control	0.349448315911731
CXCR4_Signaling	Fatty_Acid__-oxidation	0.351263066202091
CXCR4_Signaling	IL-1_Signaling	0.351771196283391
CXCR4_Signaling	Nitric_Oxide_Signaling_in_the_Cardiovascular_System	0.351771196283391
CXCR4_Signaling	Oncostatin_M_Signaling	0.3523606271777
CXCR4_Signaling	Phototransduction_Pathway	0.352650987224158
CXCR4_Signaling	Role_of_CHK_Proteins_in_Cell_Cycle_Checkpoint_Control	0.352650987224158
Fatty_Acid__-oxidation	IL-1_Signaling	0.348048780487805
Fatty_Acid__-oxidation	Nitric_Oxide_Signaling_in_the_Cardiovascular_System	0.348048780487805
Fatty_Acid__-oxidation	Oncostatin_M_Signaling	0.348943089430894
Fatty_Acid__-oxidation	Phototransduction_Pathway	0.349335075493612
Fatty_Acid__-oxidation	Role_of_CHK_Proteins_in_Cell_Cycle_Checkpoint_Control	0.349335075493612
IL-1_Signaling	Nitric_Oxide_Signaling_in_the_Cardiovascular_System	0.34873112659698
IL-1_Signaling	Oncostatin_M_Signaling	0.349157955865273
IL-1_Signaling	Phototransduction_Pathway	0.349448315911731
IL-1_Signaling	Role_of_CHK_Proteins_in_Cell_Cycle_Checkpoint_Control	0.349448315911731
Nitric_Oxide_Signaling_in_the_Cardiovascular_System	Oncostatin_M_Signaling	0.349157955865273
Nitric_Oxide_Signaling_in_the_Cardiovascular_System	Phototransduction_Pathway	0.349448315911731
Nitric_Oxide_Signaling_in_the_Cardiovascular_System	Role_of_CHK_Proteins_in_Cell_Cycle_Checkpoint_Control	0.349448315911731
Oncostatin_M_Signaling	Phototransduction_Pathway	0.35024099883856
Oncostatin_M_Signaling	Role_of_CHK_Proteins_in_Cell_Cycle_Checkpoint_Control	0.35024099883856
Phototransduction_Pathway	Role_of_CHK_Proteins_in_Cell_Cycle_Checkpoint_Control	0.350897212543554
